# Supplementary material
Source: PubMed Central journal article supplement (PMC4151784)
Supplement: ja506885s_si_002.pdf [file ja506885s_si_002.pdf]

# Stereoconvergent Arylations and Alkenylations of Unactivated Alkyl Electrophiles: The Catalytic Enantioselective Synthesis of Secondary Sulfonamides and Sulfones

Junwon Choi, Pablo Martín-Gago, and Gregory C. Fu\*

*Division of Chemistry and Chemical Engineering, California Institute of Technology  
Pasadena, California 91125*

## Supporting Information

### Table of Contents

|                                              |      |
|----------------------------------------------|------|
| I. General Information                       | S-1  |
| II. Preparation of Electrophiles             | S-2  |
| III. Enantioselective Arylations             | S-10 |
| IV. Enantioselective Alkenylations           | S-26 |
| V. Determination of Absolute Stereochemistry | S-31 |
| VI. <sup>1</sup> H NMR Spectra               | S-55 |
| VII. HPLC Data                               | S-90 |

### I. General Information

The following reagents were purchased and used as received: NiCl<sub>2</sub>·glyme (Strem), ZnI<sub>2</sub> (Strem), and Cp<sub>2</sub>ZrHCl (Strem). Ligands **L1** (available from Aldrich) and **L6** were prepared according to a literature procedure.<sup>1</sup> Grignard reagents were prepared from aryl bromides and magnesium turnings (Strem) or from aryl iodides and *i*-PrMgCl (Aldrich; 2.0 M in THF); on occasion, we have found purchased Grignard reagents to be less suitable. THF was deoxygenated and dried by sparging with argon followed by passage through an activated alumina column (S. G. Water) prior to use. All reactions were carried out in oven-dried glassware under an inert atmosphere.

<sup>1</sup>H NMR data and <sup>13</sup>C NMR data were collected on a VARIAN 500 MHz spectrometer at ambient temperature. HPLC analyses were carried out on an Agilent 1100 series system with Daicel CHIRALPAK® columns or Daicel CHIRALCEL® columns (internal diameter 4.6 mm, column length 250 mm, particle size 5 μm or 3 μm). GC analyses were carried out on an Agilent 6890 series system with an HP-5 column (length 30 m, I.D. 0.25 mm).

---

(1) Choi, J.; Fu, G. C. *J. Am. Chem. Soc.* **2012**, *134*, 9102–9105.

## II. Preparation of Electrophiles

These procedures have not been optimized.

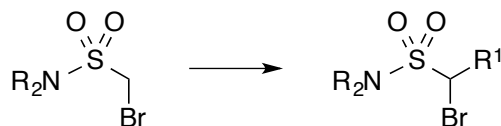

### Representative experimental procedure for the preparation of $\alpha$ -bromosulfonamides.

LDA was prepared by the dropwise addition of *n*-BuLi (1.6 M in hexanes; 13.8 mL, 22 mmol) to a solution of *i*-Pr<sub>2</sub>NH (3.36 mL, 24.0 mmol) in THF (71 mL) in a 500-mL round-bottom flask at  $-78\text{ }^\circ\text{C}$ . The reaction mixture was stirred at  $0\text{ }^\circ\text{C}$  for 15 min, and then it was cooled to  $-78\text{ }^\circ\text{C}$ . A solution of the 1-bromomethanesulfonamide (20.0 mmol; prepared according to a literature procedure from bromomethanesulfonyl chloride<sup>2</sup> and a secondary amine<sup>3</sup>) in THF (40.0 mL) was added over 15 min to the LDA solution at  $-78\text{ }^\circ\text{C}$ . The mixture was stirred for 30 min, and then a solution of the alkyl bromide (26.0 mmol) in THF (43.3 mL) was added over 15 min. The solution was stirred at  $-78\text{ }^\circ\text{C}$  for 2 h, and then it was allowed to slowly warm to r.t. The reaction mixture was stirred at r.t. for 12 h, and then the reaction was quenched by the addition of saturated aqueous NH<sub>4</sub>Cl (100 mL). The mixture was extracted with Et<sub>2</sub>O (3  $\times$  50 mL), and the combined organic layers were rinsed with brine (50 mL), dried over MgSO<sub>4</sub>, and concentrated.

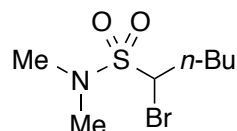

**1-Bromo-*N,N*-dimethylpentane-1-sulfonamide.** The title compound was prepared from 1-bromo-*N,N*-dimethylmethanesulfonamide (5.00 g, 24.7 mmol) and 1-bromobutane (3.45 mL, 32.2 mmol). The product was purified by column chromatography (3%  $\rightarrow$  20% ethyl acetate/hexanes): 3.00 g (47%). Colorless oil.

<sup>1</sup>H NMR (500 MHz, CDCl<sub>3</sub>)  $\delta$  4.81 (dd, 1H, *J* = 10.7, 3.1 Hz), 3.03 (s, 6H), 2.34 (dddd, 1H, *J* = 14.4, 10.0, 5.5, 3.1 Hz), 2.10–2.02 (m, 1H), 1.70–1.61 (m, 1H), 1.47–1.30 (m, 3H), 0.94 (t, 3H, *J* = 7.2 Hz).

<sup>13</sup>C NMR (126 MHz, CDCl<sub>3</sub>)  $\delta$  63.3, 38.8, 32.9, 29.2, 21.9, 13.9.

FT-IR (neat) 2958, 2873, 2814, 1483, 1458, 1435, 1414, 1380, 1342, 1287, 1237, 1203, 1171, 1145, 1106, 1064, 973, 930, 782, 750, 734 cm<sup>-1</sup>.

MS (EI) *m/z* (M<sup>+</sup>) calcd for C<sub>7</sub>H<sub>16</sub>BrNO<sub>2</sub>S: 257, found: 257.

- 
- (2) Gao, F.; Yan, X.; Zahr, O.; Larsen, A.; Vong, K.; Auclair, K. *Bioorg. Med. Chem. Lett.* **2008**, *18*, 5518–5522.
- (3) Brienne, M.-J.; Varech, D.; Leclercq, M.; Jacques, J.; Radembino, N.; Dessalles, M.-C.; Mahuzier, G.; Gueyouche, C.; Bories, C. Loiseau, P.; Gayral, P. *J. Med. Chem.* **1987**, *30*, 2232–2239.

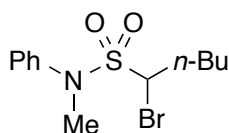

**1-Bromo-N-methyl-N-phenylpentane-1-sulfonamide.** The title compound was prepared from 1-bromo-N-methyl-N-phenylmethanesulfonamide (3.82 g, 14.5 mmol) and 1-bromobutane (2.02 mL, 18.8 mmol). The product was purified by column chromatography on silica gel (2%→15% ethyl acetate/hexanes) and then on C-18 silica gel (10%→100% acetonitrile/water): 3.60 g (78%). Colorless oil.

<sup>1</sup>H NMR (500 MHz, CDCl<sub>3</sub>) δ 7.50–7.48 (m, 2H), 7.43–7.39 (m, 2H), 7.35–7.31 (m, 1H), 4.74 (dd, 1H, *J* = 10.5, 3.1 Hz), 3.52 (s, 3H), 2.27 (dddd, 1H, *J* = 14.5, 10.2, 5.3, 3.1 Hz), 2.11–2.03 (m, 1H), 1.66–1.58 (m, 1H), 1.40–1.24 (m, 3H), 0.89 (t, 3H, *J* = 7.2 Hz).

<sup>13</sup>C NMR (126 MHz, CDCl<sub>3</sub>) δ 140.8, 129.7, 128.1, 127.3, 63.3, 42.0, 32.7, 29.1, 21.9, 13.9.

FT-IR (neat) 3062, 3039, 2957, 2931, 2872, 1595, 1493, 1466, 1453, 1436, 1351, 1270, 1237, 1183, 1143, 1106, 1068, 1026, 917, 886, 767, 725 cm<sup>-1</sup>.

MS (ESI) *m/z* (M<sup>+</sup>+H) calcd for C<sub>12</sub>H<sub>19</sub>BrNO<sub>2</sub>S: 320, found: 320.

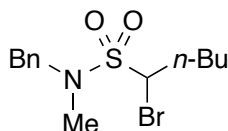

**N-Benzyl-1-bromo-N-methylpentane-1-sulfonamide.** The title compound was prepared from N-benzyl-1-bromo-N-methylmethanesulfonamide (3.75 g, 13.5 mmol) and 1-bromobutane (1.88 mL, 17.5 mmol). The product was purified by column chromatography (2%→15% ethyl acetate/hexanes): 2.04 g (45%). Light-yellow oil.

<sup>1</sup>H NMR (500 MHz, CDCl<sub>3</sub>) δ 7.39–7.35 (m, 4H), 7.34–7.30 (m, 1H), 4.84 (dd, 1H, *J* = 10.7, 3.1 Hz), 4.61 (d, 1H, *J* = 14.8 Hz), 4.36 (d, 1H, *J* = 14.8 Hz), 2.88 (s, 3H), 2.40 (dddd, 1H, *J* = 14.4, 10.0, 5.6, 3.1 Hz), 2.15–2.07 (m, 1H), 1.72–1.64 (m, 1H), 1.50–1.31 (m, 3H), 0.95 (t, 3H, *J* = 7.2 Hz).

<sup>13</sup>C NMR (126 MHz, CDCl<sub>3</sub>) δ 135.8, 128.9, 128.3, 128.2, 64.1, 55.5, 35.5, 32.9, 29.3, 21.9, 13.9.

FT-IR (neat) 3088, 3064, 3031, 2958, 2931, 2872, 1605, 1587, 1496, 1467, 1455, 1338, 1278, 1212, 1196, 1151, 1106, 1077, 1029, 994, 944, 910, 858, 787, 733 cm<sup>-1</sup>.

MS (ESI) *m/z* (M<sup>+</sup>+H) calcd for C<sub>13</sub>H<sub>21</sub>BrNO<sub>2</sub>S: 334, found: 334.

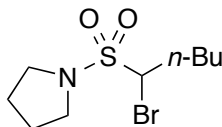

**1-((1-Bromopentyl)sulfonyl)pyrrolidine.** The title compound was prepared from 1-((bromomethyl)sulfonyl)pyrrolidine (3.02 g, 13.2 mmol) and 1-bromobutane (1.85 mL, 17.2 mmol). The product was purified by column chromatography (2%→15% ethyl acetate/hexanes): 1.96 g (52%). Light-yellow oil.

$^1\text{H}$  NMR (500 MHz,  $\text{CDCl}_3$ )  $\delta$  4.84 (dd, 1H,  $J = 10.7, 3.1$  Hz), 3.62–3.56 (m, 2H), 3.49–3.43 (m, 2H), 2.36 (dddd, 1H,  $J = 14.4, 10.0, 5.6, 3.1$  Hz), 2.11–2.03 (m, 1H), 1.99–1.94 (m, 4H), 1.70–1.61 (m, 1H), 1.48–1.30 (m, 3H), 0.94 (t, 3H,  $J = 7.2$  Hz).

$^{13}\text{C}$  NMR (126 MHz,  $\text{CDCl}_3$ )  $\delta$  63.7, 49.4, 32.7, 29.3, 26.1, 21.9, 13.9.

FT-IR (neat) 2957, 2872, 1461, 1334, 1238, 1200, 1148, 1076, 1014, 929, 781  $\text{cm}^{-1}$ .

MS (EI)  $m/z$  ( $\text{M}^+$ ) calcd for  $\text{C}_9\text{H}_{18}\text{BrNO}_2\text{S}$ : 283, found: 283.

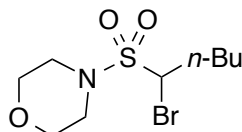

**4-((1-Bromopentyl)sulfonyl)morpholine.** The title compound was prepared from 4-((bromomethyl)sulfonyl)morpholine (3.01 g, 12.3 mmol) and 1-bromobutane (1.72 mL, 16.0 mmol). The product was purified by column chromatography (2%→20% ethyl acetate/hexanes): 1.28 g (35%). White solid.

$^1\text{H}$  NMR (500 MHz,  $\text{CDCl}_3$ )  $\delta$  4.72 (dd, 1H,  $J = 10.7, 3.1$  Hz), 3.75–3.68 (m, 4H), 3.50–3.42 (m, 4H), 2.32 (dddd, 1H,  $J = 14.3, 9.9, 5.5, 3.0$  Hz), 2.05–1.97 (m, 1H), 1.67–1.58 (m, 1H), 1.45–1.27 (m, 3H), 0.92 (t, 3H,  $J = 7.2$  Hz).

$^{13}\text{C}$  NMR (126 MHz,  $\text{CDCl}_3$ )  $\delta$  67.0, 63.8, 47.3, 32.8, 29.1, 21.8, 13.8.

FT-IR (neat) 2959, 2925, 2860, 1467, 1460, 1450, 1434, 1347, 1328, 1299, 1261, 1237, 1204, 1153, 1114, 1074, 1014, 958, 846, 778, 732  $\text{cm}^{-1}$ .

MS (EI)  $m/z$  ( $\text{M}^+$ ) calcd for  $\text{C}_9\text{H}_{18}\text{BrNO}_3\text{S}$ : 299, found: 299.

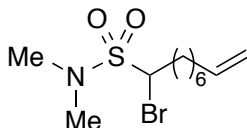

**1-Bromo-*N,N*-dimethylnon-8-ene-1-sulfonamide.** The title compound was prepared from 1-bromo-*N,N*-dimethylmethanesulfonamide (1.76 g, 8.71 mmol) and 8-bromo-1-octene (1.90 mL, 11.3 mmol). The product was purified by column chromatography (2%→20% ethyl acetate/hexanes): 1.30 g (48%). Colorless oil.

$^1\text{H}$  NMR (500 MHz,  $\text{CDCl}_3$ )  $\delta$  5.80 (ddt, 1H,  $J = 16.9, 10.2, 6.7$  Hz), 5.00 (ddt, 1H,  $J = 17.1, 2.2, 1.6$  Hz), 4.94 (ddt, 1H,  $J = 10.2, 2.2, 1.2$  Hz), 4.81 (dd, 1H,  $J = 10.6, 3.1$  Hz), 3.03 (s, 6H), 2.33 (dddd, 1H,  $J = 14.3, 10.0, 5.8, 3.1$  Hz), 2.10–2.02 (m, 3H), 1.71–1.63 (m, 1H), 1.48–1.25 (m, 7H).

$^{13}\text{C}$  NMR (126 MHz,  $\text{CDCl}_3$ )  $\delta$  139.0, 114.5, 63.3, 38.8, 33.8, 33.1, 28.8, 28.6, 27.1.

FT-IR (neat) 3075, 2923, 2852, 1640, 1479, 1454, 1414, 1340, 1285, 1204, 1143, 1063, 971, 907, 783  $\text{cm}^{-1}$ .

MS (ESI)  $m/z$  ( $\text{M}^+ + \text{H}$ ) calcd for  $\text{C}_{11}\text{H}_{23}\text{BrNO}_2\text{S}$ : 312, found: 312.



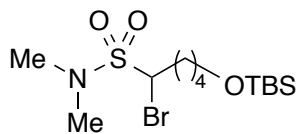

**1-Bromo-5-((*tert*-butyldimethylsilyl)oxy)-*N,N*-dimethylpentane-1-sulfonamide.** A 250-mL round-bottom flask was charged with 1-bromo-*N,N*-dimethylmethanesulfonamide (0.808 g, 4.00 mmol) and toluene (24 mL). *tert*-Butyl(4-iodobutoxy)dimethylsilane (5.03 g, 16.0 mmol), aqueous NaOH (50% w/v; 24 mL), and benzyltriethylammonium chloride (0.911 g, 4.00 mmol) were added to the solution at r.t. The resulting mixture was stirred at r.t. for 24 h, and then water (50 mL) was added. The organic phase was separated, and the aqueous solution was extracted with ethyl acetate (2 × 25 mL). The combined organic layers were dried over MgSO<sub>4</sub> and concentrated. The product was purified by column chromatography (hexanes→30% ethyl acetate/hexanes): 1.21 g (78%). Colorless oil.

<sup>1</sup>H NMR (500 MHz, CDCl<sub>3</sub>) δ 4.82 (dd, 1H, *J* = 10.7, 3.1 Hz), 3.62 (t, 2H, *J* = 6.1 Hz), 3.02 (s, 6H), 2.38–2.32 (m, 1H), 2.13–2.04 (m, 1H), 1.79–1.70 (m, 1H), 1.67–1.45 (m, 3H), 0.89 (s, 9H), 0.05 (s, 6H).

<sup>13</sup>C NMR (126 MHz, CDCl<sub>3</sub>) δ 63.2, 62.6, 38.8, 33.0, 31.8, 26.1, 23.7, 18.5, –5.2.

FT-IR (neat) 2952, 2929, 2885, 2856, 1471, 1462, 1389, 1343, 1287, 1256, 1205, 1146, 1127, 1106, 1006, 973, 939, 836, 812, 776, 740 cm<sup>-1</sup>.

MS (ESI) *m/z* (*M*<sup>+</sup>+H) calcd for C<sub>13</sub>H<sub>31</sub>BrNO<sub>3</sub>SSi: 388, found: 388.

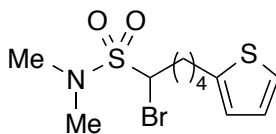

**1-Bromo-*N,N*-dimethyl-5-(thiophen-2-yl)pentane-1-sulfonamide.** The title compound was prepared from 1-bromo-*N,N*-dimethylmethanesulfonamide (3.00 g, 14.8 mmol) and 2-(4-bromobutyl)thiophene (4.23 g, 19.3 mmol). The product was purified by column chromatography (3%→20% ethyl acetate/hexanes): 1.44 g (29%). Light-yellow solid.

<sup>1</sup>H NMR (500 MHz, CDCl<sub>3</sub>) δ 7.12 (dd, 1H, *J* = 5.1, 1.2 Hz), 6.92 (dd, 1H, *J* = 5.1, 3.4 Hz), 6.79 (dddd, 1H, *J* = 3.3, 1.0, 1.0, 1.0 Hz), 4.80 (dd, 1H, *J* = 10.5, 3.2 Hz), 3.02 (s, 6H), 2.92–2.82 (m, 2H), 2.40–2.34 (m, 1H), 2.14–2.07 (m, 1H), 1.80–1.69 (m, 3H), 1.56–1.47 (m, 1H).

<sup>13</sup>C NMR (126 MHz, CDCl<sub>3</sub>) δ 144.8, 126.9, 124.4, 123.2, 63.0, 38.8, 33.0, 30.9, 29.7, 26.6.

FT-IR (neat) 2935, 2857, 1480, 1454, 1414, 1340, 1286, 1203, 1180, 1145, 1063, 972, 850, 784 cm<sup>-1</sup>.

MS (ESI) *m/z* (*M*<sup>+</sup>+H) calcd for C<sub>11</sub>H<sub>19</sub>BrNO<sub>2</sub>S<sub>2</sub>: 340, found: 340.

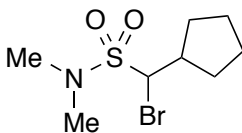

**1-Bromo-1-cyclopentyl-*N,N*-dimethylmethanesulfonamide.** The title compound was prepared from 1-bromo-*N,N*-dimethylmethanesulfonamide (3.03 g, 15.0 mmol) and cyclopentyl

4-methylbenzenesulfonate (4.69 g, 19.5 mmol). The product was purified by column chromatography (10% ethyl acetate/hexanes): 668 mg (16%). Colorless oil.

$^1\text{H}$  NMR (500 MHz,  $\text{CDCl}_3$ )  $\delta$  4.99 (d, 1H,  $J = 4.8$  Hz), 3.00 (s, 6H), 2.66–2.59 (m, 1H), 1.99–1.88 (m, 2H), 1.75–1.55 (m, 5H), 1.54–1.45 (m, 1H).

$^{13}\text{C}$  NMR (126 MHz,  $\text{CDCl}_3$ )  $\delta$  68.5, 41.8, 38.7, 31.8, 30.0, 25.6, 25.5.

FT-IR (neat) 2947, 2869, 2812, 1481, 1452, 1413, 1333, 1284, 1205, 1180, 1142, 1063, 969, 898, 862, 786  $\text{cm}^{-1}$ .

MS (EI)  $m/z$  ( $\text{M}^+ - \text{Br}$ ) calcd for  $\text{C}_8\text{H}_{16}\text{NO}_2\text{S}$ : 190, found: 190.

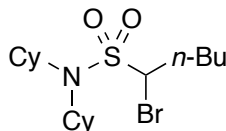

**1-Bromo-*N,N*-dicyclohexylpentane-1-sulfonamide.** The title compound was prepared from 1-bromo-*N,N*-dicyclohexylmethanesulfonamide (2.10 g, 6.21 mmol) and 1-bromobutane (0.867 mL, 8.07 mmol). The product was purified by column chromatography (1%→8% ethyl acetate/hexanes): 2.06 g (84%). Colorless oil.

$^1\text{H}$  NMR (500 MHz,  $\text{CDCl}_3$ )  $\delta$  4.57 (dd, 1H,  $J = 10.6, 2.9$  Hz), 3.38–3.33 (br m, 2H), 2.35 (dddd, 1H,  $J = 14.3, 10.1, 5.3, 2.9$  Hz), 2.07–2.00 (m, 1H), 1.95–1.91 (m, 2H), 1.86–1.59 (m, 13H), 1.45–1.23 (m, 7H), 1.09 (qt, 2H,  $J = 13.1, 3.5$  Hz), 0.92 (t, 3H,  $J = 7.2$  Hz).

$^{13}\text{C}$  NMR (126 MHz,  $\text{CDCl}_3$ )  $\delta$  66.6, 59.3, 33.9, 33.3, 32.4, 29.5, 26.6, 25.4, 22.0, 13.9.

FT-IR (neat) 2931, 2855, 1467, 1454, 1401, 1381, 1329, 1275, 1256, 1235, 1188, 1166, 1142, 1101, 1074, 1048, 1027, 997, 982, 929, 917, 895, 856, 847, 824, 801, 774, 760, 749, 733  $\text{cm}^{-1}$ .

MS (EI)  $m/z$  ( $\text{M}^+$ ) calcd for  $\text{C}_{17}\text{H}_{32}\text{BrNO}_2\text{S}$ : 393, found: 393.

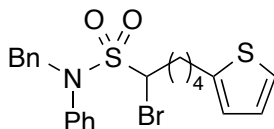

***N*-Benzyl-1-bromo-*N*-phenyl-5-(thiophen-2-yl)pentane-1-sulfonamide.** The title compound was prepared from *N*-benzyl-1-bromo-*N*-phenylmethanesulfonamide (2.70 g, 7.94 mmol) and 2-(4-bromobutyl)thiophene (2.26 g, 10.3 mmol). The product was purified by column chromatography on silica gel (2%→12% ethyl acetate/hexanes) and then preparative HPLC on C-18 silica gel (80%→100% acetonitrile/water; water was doped with 0.1% AcOH): 0.881 g (23%). White solid.

$^1\text{H}$  NMR (500 MHz,  $\text{CDCl}_3$ )  $\delta$  7.34–7.27 (m, 5H), 7.26–7.20 (m, 5H), 7.11 (dd, 1H,  $J = 5.1, 1.2$  Hz), 6.90 (dd, 1H,  $J = 5.1, 3.4$  Hz), 6.76 (dddd, 1H,  $J = 3.2, 1.0, 1.0, 1.0$  Hz), 5.34 (d, 1H,  $J = 14.8$  Hz), 4.75 (dd, 1H,  $J = 10.5, 3.1$  Hz), 4.69 (d, 1H,  $J = 14.9$  Hz), 2.88–2.78 (m, 2H), 2.38–2.31 (m, 1H), 2.21–2.13 (m, 1H), 1.79–1.65 (m, 3H), 1.51–1.43 (m, 1H).

$^{13}\text{C}$  NMR (126 MHz,  $\text{CDCl}_3$ )  $\delta$  144.8, 138.1, 136.3, 129.6, 129.4, 128.7, 128.6, 128.5, 127.9, 126.9, 124.4, 123.2, 63.3, 58.9, 32.7, 30.9, 29.6, 26.6.

FT-IR (neat) 3064, 3031, 2932, 2858, 1594, 1492, 1454, 1439, 1348, 1214, 1178, 1150, 1093, 1066, 1028, 917, 868, 822, 781  $\text{cm}^{-1}$ .

MS (ESI)  $m/z$  ( $M^+ + H$ ) calcd for  $\text{C}_{22}\text{H}_{25}\text{BrNO}_2\text{S}_2$ : 478, found: 478.

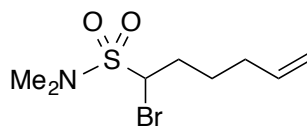

**1-Bromo-*N,N*-dimethylhex-5-ene-1-sulfonamide.** The title compound was prepared from 1-bromo-*N,N*-dimethylmethanesulfonamide (4.00 g, 19.8 mmol) and 5-bromo-1-pentene (3.05 mL, 25.7 mmol). The product was purified by column chromatography (3%  $\rightarrow$  15% ethyl acetate/hexanes): 2.29 g (43%). Colorless oil.

$^1\text{H}$  NMR (500 MHz,  $\text{CDCl}_3$ )  $\delta$  5.79 (ddt, 1H,  $J = 16.9, 10.2, 6.7$  Hz), 5.05 (dq, 1H,  $J = 17.1, 1.7$  Hz), 5.01 (ddt, 1H,  $J = 10.2, 1.9, 1.2$  Hz), 4.82 (dd, 1H,  $J = 10.5, 3.2$  Hz), 3.02 (s, 6H), 2.35 (dddd, 1H,  $J = 14.5, 10.2, 6.0, 3.2$  Hz), 2.19–2.04 (m, 3H), 1.84–1.75 (m, 1H), 1.60–1.51 (m, 1H).

$^{13}\text{C}$  NMR (126 MHz,  $\text{CDCl}_3$ )  $\delta$  137.5, 115.8, 63.0, 38.8, 32.8, 32.7, 26.4.

FT-IR (neat) 3076, 2918, 1640, 1482, 1454, 1415, 1341, 1285, 1204, 1143, 1063, 970, 912, 856, 786, 738  $\text{cm}^{-1}$ .

MS (ESI)  $m/z$  ( $M^+ + H$ ) calcd for  $\text{C}_8\text{H}_{17}\text{BrNO}_2\text{S}$ : 270, found: 270.

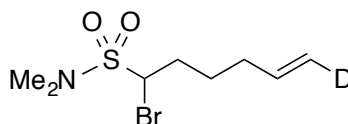

**(*E*)-1-Bromo-*N,N*-dimethylhex-5-ene-1-sulfonamide-6-*d*.** The title compound was prepared from 1-bromo-*N,N*-dimethylmethanesulfonamide (762 mg, 3.77 mmol) and (*E*)-pent-4-en-1-yl-5-*d* 4-methylbenzenesulfonate (1.18 g, 4.90 mmol). The product was purified by column chromatography (2%  $\rightarrow$  20% ethyl acetate/hexanes): 408 mg (40%). Colorless oil.

$^1\text{H}$  NMR (500 MHz,  $\text{CDCl}_3$ )  $\delta$  5.78 (dt, 1H,  $J = 16.9, 6.5$  Hz), 5.05–5.00 (m, 1H), 4.82 (dd, 1H,  $J = 10.5, 3.2$  Hz), 3.01 (s, 6H), 2.37–2.30 (m, 1H), 2.18–2.03 (m, 3H), 1.83–1.74 (m, 1H), 1.59–1.50 (m, 1H).

$^{13}\text{C}$  NMR (126 MHz,  $\text{CDCl}_3$ )  $\delta$  137.4, 115.5 (t,  $J = 24$  Hz), 63.1, 38.8, 32.8, 32.7, 26.4.

FT-IR (neat) 3028, 2949, 2862, 2264, 1621, 1483, 1455, 1435, 1414, 1342, 1287, 1204, 1183, 1144, 1064, 972, 868, 785, 744  $\text{cm}^{-1}$ .

MS (ESI)  $m/z$  ( $M^+ + H$ ) calcd for  $\text{C}_8\text{H}_{16}\text{DBrNO}_2\text{S}$ : 271, found: 271.

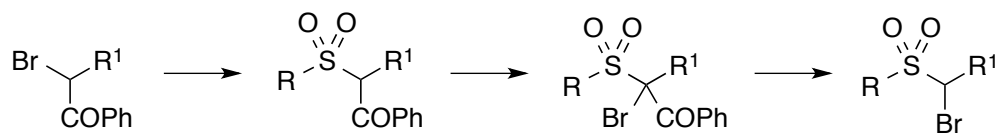

**Representative experimental procedure for the preparation of  $\alpha$ -bromosulfones.** The target molecules were prepared according to literature procedures from  $\alpha$ -bromoketones.<sup>4,5</sup> A 100-mL round-bottom flask was charged with the  $\alpha$ -bromo- $\beta$ -keto-sulfone (10.0 mmol) and aqueous KOH (30% w/v; 50 mL), and the mixture was stirred at r.t. for 48 h. When the reaction was complete (monitored by TLC), the reaction mixture was extracted with dichloromethane (3  $\times$  30 mL). The combined organic layers were dried over MgSO<sub>4</sub> and concentrated.

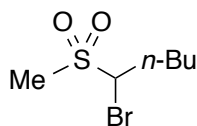

**1-Bromo-1-(methylsulfonyl)pentane.** The title compound was prepared from 2-bromo-2-(methylsulfonyl)-1-phenylhexan-1-one (12.0 g, 36.0 mmol). The product was purified by column chromatography (hexanes  $\rightarrow$  20% ethyl acetate/hexanes): 8.08 g (98%). White solid.

<sup>1</sup>H NMR (500 MHz, CDCl<sub>3</sub>)  $\delta$  4.61 (dd, 1H,  $J$  = 11.0, 3.0 Hz), 3.09 (s, 3H), 2.43 (dddd, 1H,  $J$  = 14.4, 9.9, 5.7, 3.0 Hz), 1.96 (dddd, 1H,  $J$  = 14.2, 11.1, 9.5, 4.4 Hz), 1.72–1.64 (m, 1H), 1.50–1.31 (m, 3H), 0.94 (t, 3H,  $J$  = 7.2 Hz).

<sup>13</sup>C NMR (126 MHz, CDCl<sub>3</sub>)  $\delta$  64.3, 37.6, 30.1, 29.2, 21.8, 13.8.

FT-IR (neat) 3010, 2958, 2932, 2873, 1467, 1454, 1434, 1413, 1381, 1311, 1237, 1208, 1140, 1121, 1106, 956, 928, 815, 771, 748, 735 cm<sup>-1</sup>.

MS (ESI)  $m/z$  ( $M^+$ +H) calcd for C<sub>6</sub>H<sub>14</sub>BrO<sub>2</sub>S: 229, found: 229.

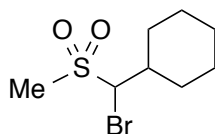

**(Bromo(methylsulfonyl)methyl)cyclohexane.** The bromination of 2-cyclohexyl-2-(methylsulfonyl)-1-phenylethan-1-one was conducted at 60 °C, and extra KBr and H<sub>2</sub>O<sub>2</sub> were added until the reaction was complete. The title compound was prepared from 2-bromo-2-cyclohexyl-2-(methylsulfonyl)-1-phenylethan-1-one (8.13 g, 22.6 mmol). The reaction was run at 40 °C for 96 h. The product was purified by column chromatography on silica gel (5%  $\rightarrow$  30% ethyl acetate/hexanes) and then on C-18 silica gel (10%  $\rightarrow$  100% acetonitrile/water): 1.69 g (29%). White solid.

- 
- (4) Suryakiran, N.; Reddy, T. S.; Ashalatha, K.; Lakshman, M.; Venkateswarlu, Y. *Tetrahedron Lett.* **2006**, *47*, 3853–3856.
- (5) Suryakiran, N.; Prabhakar, P.; Reddy, T. S.; Mahesh, K. C.; Rajesh, K.; Venkateswarlu, Y. *Tetrahedron Lett.* **2007**, *48*, 877–881.

$^1\text{H}$  NMR (500 MHz,  $\text{CDCl}_3$ )  $\delta$  4.60 (d, 1H,  $J = 2.7$  Hz), 3.10 (s, 3H), 2.41–2.35 (m, 1H), 2.08–2.04 (m, 1H), 1.84–1.76 (m, 2H), 1.72–1.67 (m, 1H), 1.64–1.61 (m, 1H), 1.48–1.30 (m, 4H), 1.21–1.12 (m, 1H).

$^{13}\text{C}$  NMR (126 MHz,  $\text{CDCl}_3$ )  $\delta$  71.0, 39.9, 37.4, 31.8, 28.5, 26.0, 25.6, 25.3.

FT-IR (neat) 3011, 2930, 2855, 1452, 1411, 1370, 1310, 1240, 1171, 1138, 1090, 1080, 1060, 1032, 968, 922, 896, 885, 848, 792, 774, 728  $\text{cm}^{-1}$ .

MS (ESI)  $m/z$  ( $\text{M}^+\text{+H}$ ) calcd for  $\text{C}_8\text{H}_{16}\text{BrO}_2\text{S}$ : 255, found: 255.

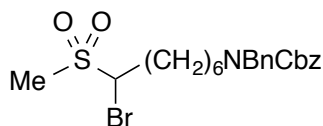

**Benzyl benzyl(7-bromo-7-(methylsulfonyl)heptyl)carbamate.** The title compound was prepared from benzyl benzyl(7-bromo-7-(methylsulfonyl)-8-oxo-8-phenyloctyl)carbamate (3.08 g, 5.13 mmol). The product was purified by column chromatography on silica gel (10%→50% ethyl acetate/hexanes) and then on C-18 silica gel (10%→100% acetonitrile/water): 1.57 g (62%). Viscous colorless oil.

$^1\text{H}$  NMR (500 MHz,  $\text{CD}_2\text{Cl}_2$ )  $\delta$  7.39–7.20 (br m, 10H), 5.18–5.14 (m, 2H), 4.68–4.60 (m, 1H), 4.50 (s, 2H), 3.28–3.20 (m, 2H), 3.06 (s, 3H), 2.40–2.30 (br m, 1H), 1.97–1.86 (br m, 1H), 1.70–1.25 (br m, 8H).

$^{13}\text{C}$  NMR (126 MHz,  $\text{CD}_2\text{Cl}_2$ )  $\delta$  156.9, 156.4, 138.6, 137.6, 128.82, 128.78, 128.2, 128.05, 127.98, 127.5, 67.3, 64.7, 50.8, 50.5, 47.4, 46.7, 37.8, 30.7, 28.6, 28.3, 27.9, 27.2, 26.7.

FT-IR (neat) 3087, 3062, 3030, 2930, 2858, 1692, 1605, 1585, 1496, 1467, 1453, 1421, 1365, 1315, 1230, 1140, 1119, 1072, 1028, 955, 915, 819, 768, 733  $\text{cm}^{-1}$ .

MS (ESI)  $m/z$  ( $\text{M}^+\text{+H}$ ) calcd for  $\text{C}_{23}\text{H}_{31}\text{BrNO}_4\text{S}$ : 496, found: 496.

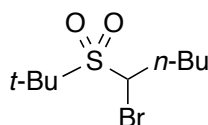

**1-Bromo-1-(tert-butylsulfonyl)pentane.** A mixture of 2-bromo-1-phenylhexan-1-one (5.10 g, 20.0 mmol), 2-methyl-2-propanethiol (1.80 g, 20.0 mmol), benzyltriethylammonium bromide (0.272 g, 1.00 mmol), and NaOH (3.00 g, 75.0 mmol) in dichloromethane (40 mL) and water (40 mL) in a 250-mL round-bottom flask was stirred at r.t. for 8 h. Then, water (100 mL) was added, and the mixture was extracted with dichloromethane (3 × 50 mL). The combined organic layers were dried over  $\text{MgSO}_4$  and concentrated. The residue was dissolved in MeOH (50 mL) and water (50 mL), and then oxone<sup>®</sup> (30.7 g, 100 mmol) was added. The reaction mixture was stirred at r.t. overnight, and most of the MeOH was removed under reduced pressure. The resulting aqueous mixture was extracted with dichloromethane (3 × 30 mL). The combined organic layers were dried over  $\text{MgSO}_4$  and concentrated. 2-(tert-Butylsulfonyl)-1-phenylhexan-1-one was purified by column chromatography (5%→60% ethyl acetate/hexanes): 5.34 g (90%). White solid.

2-Bromo-2-(*tert*-butylsulfonyl)-1-phenylhexan-1-one was prepared from 2-(*tert*-butylsulfonyl)-1-phenylhexan-1-one following the described procedure.

The title compound was prepared from 2-bromo-2-(*tert*-butylsulfonyl)-1-phenylhexan-1-one (2.30 g, 6.13 mmol). The reaction was conducted at 40 °C. The product was purified by column chromatography (hexanes→20% ethyl acetate/hexanes): 1.41 g (85%). White solid.

<sup>1</sup>H NMR (500 MHz, CDCl<sub>3</sub>) δ 4.84 (dd, 1H, *J* = 10.5, 3.0 Hz), 2.43 (dddd, 1H, *J* = 14.5, 10.2, 5.3, 2.9 Hz), 2.11–2.03 (m, 1H), 1.75–1.66 (m, 1H), 1.55 (s, 9H), 1.48–1.30 (m, 3H), 0.94 (t, 3H, *J* = 7.2 Hz).

<sup>13</sup>C NMR (126 MHz, CDCl<sub>3</sub>) δ 63.3, 59.2, 30.8, 28.8, 25.2, 22.0, 13.9.

FT-IR (neat) 2959, 2933, 2873, 1479, 1467, 1399, 1366, 1305, 1192, 1167, 1118, 1104, 1020, 986, 964, 929, 801, 733 cm<sup>-1</sup>.

MS (ESI) *m/z* (M<sup>+</sup>+Na) calcd for C<sub>9</sub>H<sub>19</sub>BrNaO<sub>2</sub>S: 293, found: 293.

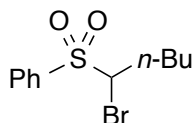

**((1-Bromopentyl)sulfonyl)benzene.** The title compound was prepared from 2-bromo-1-phenyl-2-(phenylsulfonyl)hexan-1-one (12.0 g, 30.4 mmol). The reaction was conducted at 60 °C. The product was purified by column chromatography (hexanes→20% ethyl acetate/hexanes): 8.50 g (96%). White solid.

<sup>1</sup>H NMR (500 MHz, CDCl<sub>3</sub>) δ 7.98–7.95 (m, 2H), 7.72–7.68 (m, 1H), 7.61–7.57 (m, 2H), 4.70 (dd, 1H, *J* = 11.1, 2.9 Hz), 2.41 (dddd, 1H, *J* = 14.3, 9.9, 5.8, 2.9 Hz), 1.89 (dddd, 1H, *J* = 14.1, 11.1, 9.4, 4.4 Hz), 1.67–1.58 (m, 1H), 1.45–1.26 (m, 3H), 0.91 (t, 3H, *J* = 7.2 Hz).

<sup>13</sup>C NMR (126 MHz, CDCl<sub>3</sub>) δ 135.5, 134.6, 130.2, 129.2, 66.0, 31.0, 29.2, 21.8, 13.8.

FT-IR (neat) 3065, 2958, 2932, 2872, 1584, 1478, 1466, 1447, 1381, 1324, 1309, 1236, 1203, 1149, 1133, 1083, 1024, 999, 929, 792, 778, 746 cm<sup>-1</sup>.

MS (ESI) *m/z* (M<sup>+</sup>+H) calcd for C<sub>11</sub>H<sub>16</sub>BrO<sub>2</sub>S: 291, found: 291.

### III. Enantioselective Arylations

**General Procedure.** An oven-dried 8-mL vial equipped with a magnetic stir bar was capped with a PTFE-lined septum cap, cooled under vacuum, and then filled with nitrogen. ZnI<sub>2</sub> (290 mg, 0.910 mmol) was added to the vial, and the vial was then immediately placed under vacuum and refilled with nitrogen (three cycles). Next, THF (2.73 mL) was added to the vial, followed by a solution of ArMgBr (prepared according to a literature procedure;<sup>1</sup> 1.00 M in THF; 0.910 mL, 0.910 mmol). The mixture was stirred at r.t. for 30 min. An oven-dried 20-mL vial equipped with a magnetic stir bar was charged with NiCl<sub>2</sub>·glyme (15.4 mg, 0.070 mmol), (*R,R*)-L1 (30.4 mg, 0.091 mmol), and the electrophile (0.70 mmol). The vial was sealed with a PTFE-lined septum cap, placed under vacuum, and then filled with nitrogen; this cycle was repeated three times. THF (4.14 mL) was added, and the mixture was stirred at r.t. for 20 min, at which

time it had become homogenous. Both vials were wrapped with electrical tape, attached with nitrogen-filled balloons, and cooled to  $-20\text{ }^{\circ}\text{C}$  for 15 min. The heterogeneous mixture of the nucleophile was then transferred by syringe over 2 min to the vial that contained the electrophile. The nitrogen-filled balloon was removed, and the septum cap was covered with grease. The reaction mixture was stirred at  $-20\text{ }^{\circ}\text{C}$  for 24 h, and then the reaction was quenched by the addition of ethanol (0.70 mL). The solution was allowed to warm to r.t., and then it was filtered through a pad of silica (eluted with  $\text{Et}_2\text{O}$ ). The filtrate was concentrated, and the residue was purified by column chromatography.

A second run was conducted with (*S,S*)-L1.

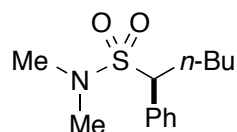

**(*S*)-*N,N*-Dimethyl-1-phenylpentane-1-sulfonamide (Table 2, Entry 1).** 1-Bromo-*N,N*-dimethylpentane-1-sulfonamide (181 mg, 0.700 mmol) and phenylzinc iodide (0.910 mmol) were used. The product was purified by column chromatography (20%  $\rightarrow$  25%  $\text{Et}_2\text{O}$ /hexanes). Light-yellow solid. First run: 159 mg (89%, 96% ee). Second run: 162 mg (91%, 96% ee).

The ee was determined by HPLC on a CHIRALCEL OD-H column (1% *i*-PrOH/hexanes, 1.0 mL/min) with  $t_r = 10.9$  min (major), 13.4 min (minor).

$^1\text{H}$  NMR (500 MHz,  $\text{CDCl}_3$ )  $\delta$  7.42–7.34 (m, 5H), 4.08 (dd, 1H,  $J = 11.3, 3.8$  Hz), 2.53 (s, 6H), 2.34 (dddd, 1H,  $J = 13.7, 10.2, 6.5, 3.8$  Hz), 2.15 (dddd, 1H,  $J = 13.6, 11.4, 10.0, 5.1$  Hz), 1.38–1.23 (m, 2H), 1.22–1.09 (m, 2H), 0.84 (t, 3H,  $J = 7.3$  Hz).

$^{13}\text{C}$  NMR (126 MHz,  $\text{CDCl}_3$ )  $\delta$  133.9, 129.6, 129.0, 128.9, 67.7, 37.8, 29.6, 28.9, 22.4, 13.9.

FT-IR (neat) 3017, 2952, 2930, 2872, 1497, 1455, 1326, 1305, 1288, 1204, 1137, 1109, 1064, 973, 820, 808  $\text{cm}^{-1}$ .

MS (ESI)  $m/z$  ( $\text{M}^+ + \text{Na}$ ) calcd for  $\text{C}_{13}\text{H}_{21}\text{NNaO}_2\text{S}$ : 278, found: 278.

$[\alpha]_{\text{D}}^{25} = -30^{\circ}$  ( $c = 1.02, \text{CHCl}_3$ ).

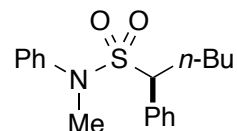

**(*S*)-*N*-Methyl-*N*,1-diphenylpentane-1-sulfonamide (Table 2, Entry 2).** 1-Bromo-*N*-methyl-*N*-phenylpentane-1-sulfonamide (224 mg, 0.700 mmol) and phenylzinc iodide (0.910 mmol) were used. The product was purified by column chromatography (10%  $\text{Et}_2\text{O}$ /hexanes). Light-yellow solid. First run: 211 mg (95%, 93% ee). Second run: 211 mg (95%, 95% ee).

The ee was determined by HPLC on a CHIRALCEL OD-H column (2% *i*-PrOH/hexanes, 1.0 mL/min) with  $t_r = 10.5$  min (major), 11.7 min (minor).

$^1\text{H}$  NMR (500 MHz,  $\text{CDCl}_3$ )  $\delta$  7.41–7.35 (m, 5H), 7.31–7.27 (m, 2H), 7.21–7.18 (m, 1H), 7.17–7.14 (m, 2H), 4.11 (dd, 1H,  $J = 11.4, 3.7$  Hz), 2.88 (s, 3H), 2.32 (dddd, 1H,  $J = 13.6, 10.1, 6.5, 3.7$

Hz), 2.14 (dddd, 1H,  $J = 13.4, 11.4, 9.9, 5.2$  Hz), 1.34–1.18 (m, 2H), 1.17–1.03 (m, 2H), 0.80 (t, 3H,  $J = 7.3$  Hz).

$^{13}\text{C}$  NMR (126 MHz,  $\text{CDCl}_3$ )  $\delta$  141.7, 133.7, 129.9, 129.1, 129.0, 128.8, 126.5, 125.8, 68.2, 39.2, 30.0, 28.9, 22.4, 13.9.

FT-IR (neat) 3063, 3030, 2957, 2932, 2872, 1596, 1493, 1455, 1423, 1380, 1342, 1266, 1179, 1143, 1108, 1067, 1028, 1003, 969, 917, 880, 801, 765  $\text{cm}^{-1}$ .

MS (ESI)  $m/z$  ( $\text{M}^+ + \text{Na}$ ) calcd for  $\text{C}_{18}\text{H}_{23}\text{NNaO}_2\text{S}$ : 340, found: 340.

$[\alpha]_{\text{D}}^{25} = -105^\circ$  ( $c = 1.01$ ,  $\text{CHCl}_3$ ).

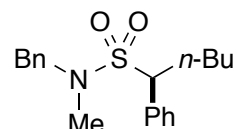

**(S)-N-Benzyl-N-methyl-1-phenylpentane-1-sulfonamide (Table 2, Entry 3).** *N*-Benzyl-1-bromo-*N*-methylpentane-1-sulfonamide (234 mg, 0.700 mmol) and phenylzinc iodide (0.910 mmol) were used. The product was purified by column chromatography (7% ethyl acetate/hexanes). Light-yellow solid. First run: 219 mg (94%, 94% ee). Second run: 221 mg (95%, 93% ee).

The ee was determined by HPLC on a CHIRALPAK AD-H column (2% *i*-PrOH/hexanes, 1.0 mL/min) with  $t_r = 25.8$  min (major), 28.9 min (minor).

$^1\text{H}$  NMR (500 MHz,  $\text{CDCl}_3$ )  $\delta$  7.42–7.36 (m, 5H), 7.31–7.23 (m, 3H), 7.22–7.18 (m, 2H), 4.12 (dd, 1H,  $J = 11.3, 3.8$  Hz), 4.01 (d, 1H,  $J = 14.7$  Hz), 3.68 (br d, 1H,  $J = 11.0$  Hz), 2.42 (s, 3H), 2.38 (dddd, 1H,  $J = 13.7, 10.1, 6.2, 3.8$  Hz), 2.21 (dddd, 1H,  $J = 13.5, 11.3, 9.8, 5.2$  Hz), 1.42–1.26 (m, 2H), 1.26–1.12 (m, 2H), 0.85 (t, 3H,  $J = 7.3$  Hz).

$^{13}\text{C}$  NMR (126 MHz,  $\text{CDCl}_3$ )  $\delta$  136.3, 133.9, 129.7, 129.0, 128.9, 128.6, 128.3, 127.9, 68.5, 54.2, 34.6, 29.6, 29.0, 22.4, 13.9.

FT-IR (neat) 3063, 3030, 2954, 2930, 2870, 1495, 1454, 1363, 1327, 1214, 1149, 1133, 1075, 1003, 944, 890, 807, 760  $\text{cm}^{-1}$ .

MS (ESI)  $m/z$  ( $\text{M}^+ + \text{Na}$ ) calcd for  $\text{C}_{19}\text{H}_{25}\text{NNaO}_2\text{S}$ : 354, found: 354.

$[\alpha]_{\text{D}}^{25} = -54^\circ$  ( $c = 1.03$ ,  $\text{CHCl}_3$ ).

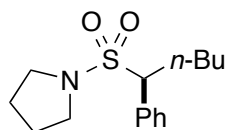

**(S)-1-((1-Phenylpentyl)sulfonyl)pyrrolidine (Table 2, Entry 4).** 1-((1-Bromopentyl)sulfonyl)pyrrolidine (199 mg, 0.700 mmol) and phenylzinc iodide (0.910 mmol) were used. The product was purified by column chromatography (10% ethyl acetate/hexanes). White solid. First run: 166 mg (84%, 96% ee). Second run: 170 mg (86%, 96% ee).

The ee was determined by HPLC on a CHIRALPAK AD-H column (2% *i*-PrOH/hexanes, 1.0 mL/min) with  $t_r = 13.8$  min (minor), 20.2 min (major).



$^1\text{H}$  NMR (500 MHz,  $\text{CDCl}_3$ )  $\delta$  7.43–7.39 (m, 2H), 7.39–7.33 (m, 3H), 4.11 (dd, 1H,  $J = 11.3, 3.8$  Hz), 3.21–3.13 (m, 2H), 2.84–2.77 (m, 2H), 2.33 (dddd, 1H,  $J = 13.8, 10.1, 6.4, 3.8$  Hz), 2.17 (dddd, 1H,  $J = 13.5, 11.3, 9.6, 5.2$  Hz), 1.74–1.67 (m, 2H), 1.67–1.58 (m, 2H), 1.39–1.24 (m, 2H), 1.24–1.10 (m, 2H), 0.84 (t, 3H,  $J = 7.3$  Hz).

$^{13}\text{C}$  NMR (126 MHz,  $\text{CDCl}_3$ )  $\delta$  134.3, 129.7, 128.8, 128.7, 67.7, 48.2, 29.2, 29.0, 25.9, 22.4, 13.9.

FT-IR (neat) 3436, 2957, 2887, 2872, 2857, 1498, 1467, 1456, 1325, 1294, 1240, 1198, 1143, 1128, 1084, 1015, 829, 806, 728  $\text{cm}^{-1}$ .

MS (ESI)  $m/z$  ( $\text{M}^+ + \text{Na}$ ) calcd for  $\text{C}_{15}\text{H}_{23}\text{NNaO}_2\text{S}$ : 304, found: 304.

$[\alpha]_{\text{D}}^{25} = -51^\circ$  ( $c = 0.97, \text{CHCl}_3$ ).

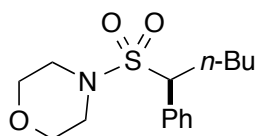

**(S)-4-((1-Phenylpentyl)sulfonyl)morpholine (Table 2, Entry 5).** 4-((1-

Bromopentyl)sulfonyl)morpholine (210 mg, 0.700 mmol) and phenylzinc iodide (0.910 mmol) were used. The product was purified by column chromatography (20% ethyl acetate/hexanes). White solid. First run: 197 mg (95%, 98% ee). Second run: 186 mg (89%, 95% ee).

The ee was determined by HPLC on a CHIRALCEL OD-H column (3% *i*-PrOH/hexanes, 1.0 mL/min) with  $t_r = 13.9$  min (major), 16.7 min (minor).

$^1\text{H}$  NMR (500 MHz,  $\text{CDCl}_3$ )  $\delta$  7.44–7.35 (m, 5H), 4.02 (dd, 1H,  $J = 11.3, 3.8$  Hz), 3.56–3.52 (m, 2H), 3.48–3.43 (m, 2H), 3.06–3.02 (m, 2H), 2.75 (br s, 2H), 2.34 (dddd, 1H,  $J = 13.8, 10.1, 6.3, 3.8$  Hz), 2.13 (dddd, 1H,  $J = 13.4, 11.3, 9.8, 5.1$  Hz), 1.39–1.23 (m, 2H), 1.23–1.08 (m, 2H), 0.84 (t, 3H,  $J = 7.3$  Hz).

$^{13}\text{C}$  NMR (126 MHz,  $\text{CDCl}_3$ )  $\delta$  133.5, 129.7, 129.2, 129.0, 68.5, 67.0, 46.3, 29.7, 28.9, 22.4, 13.9.

FT-IR (neat) 2955, 2923, 2859, 1496, 1455, 1336, 1323, 1257, 1214, 1152, 1128, 1110, 1076, 955, 924, 848, 803  $\text{cm}^{-1}$ .

MS (ESI)  $m/z$  ( $\text{M}^+ + \text{Na}$ ) calcd for  $\text{C}_{15}\text{H}_{23}\text{NNaO}_3\text{S}$ : 320, found: 320.

$[\alpha]_{\text{D}}^{25} = -34^\circ$  ( $c = 1.02, \text{CHCl}_3$ ).

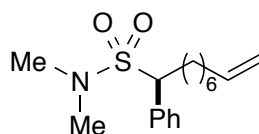

**(S)-*N,N*-Dimethyl-1-phenylnon-8-ene-1-sulfonamide (Table 2, Entry 6).** 1-Bromo-*N,N*-dimethylnon-8-ene-1-sulfonamide (219 mg, 0.700 mmol) and phenylzinc iodide (0.910 mmol) were used. The product was purified by column chromatography (5%→10% ethyl acetate/hexanes). Light-yellow solid. First run: 192 mg (89%, 95% ee). Second run: 189 mg (87%, 95% ee).

The ee was determined by HPLC on a CHIRALCEL OD-H column (1% *i*-PrOH/hexanes, 1.0 mL/min) with  $t_r = 12.8$  min (major), 20.6 min (minor).

$^1\text{H}$  NMR (500 MHz,  $\text{CDCl}_3$ )  $\delta$  7.41–7.34 (m, 5H), 5.76 (dddd, 1H,  $J = 16.9, 10.2, 6.7, 6.7$  Hz), 4.96 (dddd, 1H,  $J = 17.1, 2.2, 1.6, 1.6$  Hz), 4.91 (dddd, 1H,  $J = 10.2, 2.3, 1.2, 1.2$  Hz), 4.08 (dd, 1H,  $J = 11.3, 3.9$  Hz), 2.53 (s, 6H), 2.30 (dddd, 1H,  $J = 13.7, 10.2, 6.5, 3.9$  Hz), 2.19–2.11 (m, 1H), 2.01–1.96 (m, 2H), 1.35–1.11 (m, 8H).

$^{13}\text{C}$  NMR (126 MHz,  $\text{CDCl}_3$ )  $\delta$  139.1, 133.9, 129.6, 129.0, 128.9, 114.4, 67.7, 37.8, 33.8, 29.8, 29.1, 28.8, 26.7.

FT-IR (neat) 3062, 2924, 2853, 1640, 1497, 1468, 1456, 1414, 1327, 1208, 1137, 1066, 977, 912, 824  $\text{cm}^{-1}$ .

MS (ESI)  $m/z$  ( $\text{M}^+ + \text{Na}$ ) calcd for  $\text{C}_{17}\text{H}_{27}\text{NNaO}_2\text{S}$ : 332, found: 332.

$[\alpha]_{\text{D}}^{25} = -19.2^\circ$  ( $c = 0.98$ ,  $\text{CHCl}_3$ ).

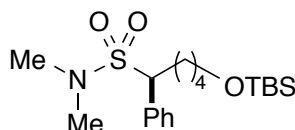

**(S)-5-((*tert*-Butyldimethylsilyloxy)-*N,N*-dimethyl-1-phenylpentane-1-sulfonamide (Table 2, Entry 7).** 1-Bromo-5-((*tert*-butyldimethylsilyloxy)-*N,N*-dimethylpentane-1-sulfonamide (272 mg, 0.700 mmol) and phenylzinc iodide (0.910 mmol) were used. The product was purified by column chromatography (2%  $\rightarrow$  20% ethyl acetate/hexanes). White solid. First run: 248 mg (92%, >99% ee). Second run: 250 mg (93%, 98% ee).

The ee was determined by HPLC on a CHIRALCEL OD-H column (2% *i*-PrOH/hexanes, 1.0 mL/min) with  $t_r = 8.2$  min (major), 11.0 min (minor).

$^1\text{H}$  NMR (500 MHz,  $\text{CDCl}_3$ )  $\delta$  7.41–7.33 (m, 5H), 4.09 (dd, 1H,  $J = 11.3, 3.9$  Hz), 3.56–3.49 (m, 2H), 2.53 (s, 6H), 2.35–2.28 (m, 1H), 2.21–2.13 (m, 1H), 1.57–1.42 (m, 2H), 1.27–1.18 (m, 2H), 0.82 (s, 9H),  $-0.02$  (s, 6H).

$^{13}\text{C}$  NMR (126 MHz,  $\text{CDCl}_3$ )  $\delta$  133.7, 129.6, 129.0, 128.9, 67.6, 62.7, 37.8, 32.4, 29.7, 26.0, 23.1, 18.4,  $-5.2$ .

FT-IR (neat) 3065, 2931, 2897, 2860, 1458, 1385, 1359, 1329, 1280, 1257, 1200, 1143, 1132, 1110, 1092, 966, 900, 872, 833, 808, 779, 736  $\text{cm}^{-1}$ .

MS (ESI)  $m/z$  ( $\text{M}^+ + \text{Na}$ ) calcd for  $\text{C}_{19}\text{H}_{35}\text{NNaO}_3\text{SSi}$ : 408, found: 408.

$[\alpha]_{\text{D}}^{25} = -15.0^\circ$  ( $c = 0.98$ ,  $\text{CHCl}_3$ ).

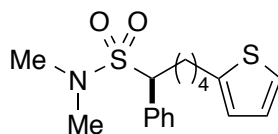

**(S)-*N,N*-Dimethyl-1-phenyl-5-(thiophen-2-yl)pentane-1-sulfonamide (Table 2, Entry 8).** 1-Bromo-*N,N*-dimethyl-5-(thiophen-2-yl)pentane-1-sulfonamide (238 mg, 0.700 mmol) and phenylzinc iodide (1.05 mmol) were used. The product was purified by column chromatography (10%  $\rightarrow$  15% ethyl acetate/hexanes). Yellow solid. First run: 128 mg (54%, 90% ee). Second run: 131 mg (55%, 91% ee).

The ee was determined by HPLC on a CHIRALCEL OD-H column (5% *i*-PrOH/hexanes, 1.0 mL/min) with  $t_r$  = 18.3 min (major), 22.8 min (minor).

$^1\text{H}$  NMR (500 MHz,  $\text{CDCl}_3$ )  $\delta$  7.41–7.34 (m, 5H), 7.08 (dd, 1H,  $J$  = 5.1, 1.2 Hz), 6.88 (dd, 1H,  $J$  = 5.1, 3.4 Hz), 6.71 (dddd, 1H,  $J$  = 3.3, 1.0, 1.0, 1.0 Hz), 4.08 (dd, 1H,  $J$  = 11.2, 3.9 Hz), 2.82–2.70 (m, 2H), 2.52 (s, 6H), 2.39–2.32 (m, 1H), 2.23–2.15 (m, 1H), 1.74–1.61 (m, 2H), 1.35–1.21 (m, 2H).

$^{13}\text{C}$  NMR (126 MHz,  $\text{CDCl}_3$ )  $\delta$  145.1, 133.8, 129.6, 129.0, 128.9, 126.8, 124.2, 123.0, 67.6, 37.8, 31.4, 29.65, 29.59, 26.2.

FT-IR (neat) 3064, 2932, 2856, 1495, 1480, 1454, 1331, 1282, 1200, 1140, 1062, 1030, 967, 849, 820  $\text{cm}^{-1}$ .

MS (ESI)  $m/z$  ( $\text{M}^+ + \text{Na}$ ) calcd for  $\text{C}_{17}\text{H}_{23}\text{NNaO}_2\text{S}_2$ : 360, found: 360.

$[\alpha]_{\text{D}}^{25} = -9.4^\circ$  ( $c = 0.99$ ,  $\text{CHCl}_3$ ).

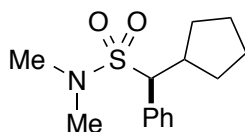

**(S)-1-Cyclopentyl-*N,N*-dimethyl-1-phenylmethanesulfonamide (Table 2, Entry 9).** 1-Bromo-1-cyclopentyl-*N,N*-dimethylmethanesulfonamide (189 mg, 0.700 mmol) and phenylzinc iodide (1.05 mmol) were used. The product was purified by column chromatography (first purification: 10% ethyl acetate/hexanes; second purification: 12% → 100% dichloromethane/hexanes). White solid. First run: 86 mg (46%, >99% ee). Second run: 79 mg (42%, >99% ee).

The ee was determined by HPLC on a CHIRALCEL OD-H column (1% *i*-PrOH/hexanes, 1.0 mL/min) with  $t_r$  = 12.7 min (major), 14.6 min (minor).

$^1\text{H}$  NMR (500 MHz,  $\text{CDCl}_3$ )  $\delta$  7.41–7.38 (m, 2H), 7.37–7.31 (m, 3H), 3.92 (d, 1H,  $J$  = 10.3 Hz), 2.78–2.69 (m, 1H), 2.43 (s, 6H), 2.29–2.22 (m, 1H), 1.75–1.67 (m, 1H), 1.66–1.60 (m, 1H), 1.59–1.41 (m, 4H), 1.03–0.95 (m, 1H).

$^{13}\text{C}$  NMR (126 MHz,  $\text{CDCl}_3$ )  $\delta$  135.2, 129.7, 128.69, 128.67, 73.2, 41.8, 37.6, 32.3, 32.1, 25.5, 24.1.

FT-IR (neat) 3090, 3064, 3025, 2960, 2871, 2812, 1496, 1479, 1452, 1323, 1293, 1206, 1188, 1131, 1081, 1063, 1030, 1003, 969, 911, 872, 848, 807, 732  $\text{cm}^{-1}$ .

MS (EI)  $m/z$  ( $\text{M}^+ - \text{SO}_2\text{NMe}_2$ ) calcd for  $\text{C}_{12}\text{H}_{15}$ : 159, found: 159.

$[\alpha]_{\text{D}}^{25} = -43^\circ$  ( $c = 1.04$ ,  $\text{CHCl}_3$ ).

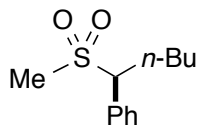

**(S)-1-(1-(Methylsulfonyl)pentyl)benzene (Table 3, Entry 1).** 1-Bromo-1-(methylsulfonyl)pentane (160 mg, 0.700 mmol) and phenylzinc iodide (0.910 mmol) were used. The product was purified by column chromatography (20% → 30% ethyl acetate/hexanes). White solid. First run: 150 mg (95%, 94% ee). Second run: 153 mg (97%, 94% ee).

The ee was determined by HPLC on a CHIRALCEL OD-H column (5% *i*-PrOH/hexanes, 1.0 mL/min) with  $t_r$  = 17.6 min (major), 20.8 min (minor).

$^1\text{H}$  NMR (500 MHz,  $\text{CDCl}_3$ )  $\delta$  7.42–7.37 (m, 5H), 3.99 (dd, 1H,  $J$  = 11.5, 3.7 Hz), 2.59 (s, 3H), 2.45–2.37 (m, 1H), 2.12 (dddd, 1H,  $J$  = 13.6, 11.5, 9.6, 5.3 Hz), 1.41–1.26 (m, 2H), 1.25–1.14 (m, 2H), 0.85 (t, 3H,  $J$  = 7.1 Hz).

$^{13}\text{C}$  NMR (126 MHz,  $\text{CDCl}_3$ )  $\delta$  133.4, 129.5, 129.28, 129.27, 70.4, 38.7, 28.9, 26.7, 22.4, 13.9.

FT-IR (neat) 3088, 3065, 3051, 3011, 2931, 2869, 1496, 1468, 1456, 1417, 1379, 1292, 1277, 1263, 1211, 1158, 1130, 1107, 1072, 1036, 966, 936, 904, 805, 722  $\text{cm}^{-1}$ .

MS (ESI)  $m/z$  ( $\text{M}^+$ +Na) calcd for  $\text{C}_{12}\text{H}_{18}\text{NaO}_2\text{S}$ : 249, found: 249.

$[\alpha]_D^{25} = -6.2^\circ$  ( $c$  = 1.00,  $\text{CHCl}_3$ ).

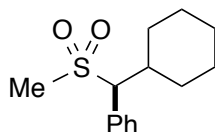

**(S)-(Cyclohexyl(methylsulfonyl)methyl)benzene (Table 3, Entry 2).**

(Bromo(methylsulfonyl)methyl)cyclohexane (179 mg, 0.700 mmol) and phenylzinc iodide (1.05 mmol) were used. The product was purified by column chromatography (10%→15% ethyl acetate/hexanes). White solid. First run: 145 mg (82%, 99% ee). Second run: 148 mg (84%, 99% ee).

The ee was determined by HPLC on a CHIRALPAK AD-H column (4% *i*-PrOH/hexanes, 1.0 mL/min) with  $t_r$  = 16.7 min (minor), 25.8 min (major).

$^1\text{H}$  NMR (500 MHz,  $\text{CDCl}_3$ )  $\delta$  7.43–7.36 (m, 5H), 3.87 (d, 1H,  $J$  = 7.9 Hz), 2.53–2.45 (m, 1H), 2.46 (s, 3H), 2.29–2.24 (m, 1H), 1.80–1.74 (m, 1H), 1.67–1.56 (m, 3H), 1.42–1.33 (m, 1H), 1.28–1.18 (m, 2H), 1.14–1.05 (m, 1H), 0.93–0.85 (m, 1H).

$^{13}\text{C}$  NMR (126 MHz,  $\text{CDCl}_3$ )  $\delta$  133.9, 129.8, 129.2, 129.1, 75.9, 41.4, 38.1, 32.4, 30.6, 26.11, 26.06, 26.0.

FT-IR (neat) 3004, 2930, 2853, 1496, 1454, 1413, 1378, 1348, 1319, 1302, 1292, 1244, 1221, 1170, 1127, 1076, 1036, 970, 896, 854, 804, 742  $\text{cm}^{-1}$ .

MS (ESI)  $m/z$  ( $\text{M}^+$ +Na) calcd for  $\text{C}_{14}\text{H}_{20}\text{NaO}_2\text{S}$ : 275, found: 275.

$[\alpha]_D^{25} = -40^\circ$  ( $c$  = 1.06,  $\text{CHCl}_3$ ).

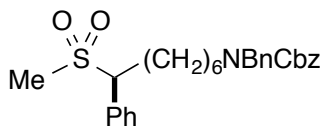

**Benzyl (S)-benzyl(7-(methylsulfonyl)-7-phenylheptyl)carbamate (Table 3, Entry 3).** Benzyl benzyl(7-bromo-7-(methylsulfonyl)heptyl)carbamate (199 mg, 0.400 mmol) and phenylzinc iodide (0.520 mmol) were used. The product was purified by column chromatography on silica gel (25% ethyl acetate/hexanes) and then preparative HPLC on C-18 silica gel (80%→100% acetonitrile/water; water was doped with 0.1% AcOH). Viscous colorless oil. First run: 149 mg (75%, 89% ee). Second run: 145 mg (73%, 91% ee).

The ee was determined by HPLC on a CHIRALCEL OD-H column (20% *i*-PrOH/hexanes, 1.0 mL/min) with  $t_r = 31.5$  min (major), 40.0 min (minor).

$^1\text{H}$  NMR (500 MHz,  $\text{CD}_2\text{Cl}_2$ )  $\delta$  7.44–7.17 (m, 15H), 5.14–5.12 (m, 2H), 4.45 (s, 2H), 4.01–3.95 (m, 1H), 3.22–3.15 (m, 2H), 2.59 (s, 3H), 2.35–2.23 (br m, 1H), 2.12–1.99 (br m, 1H), 1.48–1.40 (br m, 2H), 1.35–1.09 (br m, 6H).

$^{13}\text{C}$  NMR (126 MHz,  $\text{CD}_2\text{Cl}_2$ )  $\delta$  156.9, 156.3, 138.7, 137.6, 133.6, 129.9, 129.40, 129.36, 128.8, 128.7, 128.2, 128.01, 127.95, 127.5, 70.3, 67.3, 50.8, 50.4, 47.4, 46.7, 38.9, 29.2, 28.4, 27.9, 27.4, 26.9, 26.8.

FT-IR (neat) 3088, 3063, 3031, 3007, 2931, 2858, 1697, 1605, 1586, 1496, 1468, 1454, 1422, 1366, 1305, 1232, 1137, 1086, 1071, 1029, 1002, 954, 916, 801  $\text{cm}^{-1}$ .

MS (ESI)  $m/z$  ( $\text{M}^+\text{+H}$ ) calcd for  $\text{C}_{29}\text{H}_{36}\text{NO}_4\text{S}$ : 494, found: 494.

$[\alpha]_{\text{D}}^{25} = -0.037^\circ$  ( $c = 4.1$ ,  $\text{CHCl}_3$ ).

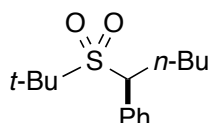

**(S)-1-(*tert*-Butylsulfonyl)pentylbenzene (Table 3, Entry 4).** 1-Bromo-1-(*tert*-butylsulfonyl)pentane (190 mg, 0.700 mmol) and phenylzinc iodide (0.910 mmol) were used. The product was purified by column chromatography (15% ethyl acetate/hexanes). White solid. First run: 179 mg (95%, 99% ee). Second run: 182 mg (97%, 98% ee).

The ee was determined by HPLC on a CHIRALPAK IB-3 column (1% *i*-PrOH/hexanes, 1.0 mL/min) with  $t_r = 8.4$  min (major), 9.9 min (minor).

$^1\text{H}$  NMR (500 MHz,  $\text{CDCl}_3$ )  $\delta$  7.47–7.45 (m, 2H), 7.39–7.32 (m, 3H), 4.14 (dd, 1H,  $J = 11.6, 3.3$  Hz), 2.47 (dddd, 1H,  $J = 13.6, 10.6, 6.2, 3.3$  Hz), 2.06 (dddd, 1H,  $J = 13.4, 11.6, 10.2, 4.9$  Hz), 1.40–1.30 (m, 1H), 1.29–1.21 (m, 1H), 1.16 (s, 9H), 1.15–1.01 (m, 2H), 0.82 (t, 3H,  $J = 7.3$  Hz).

$^{13}\text{C}$  NMR (126 MHz,  $\text{CDCl}_3$ )  $\delta$  134.9, 129.6, 129.0, 128.9, 65.3, 62.1, 28.9, 28.7, 24.4, 22.4, 13.9.

FT-IR (neat) 3032, 2986, 2954, 2872, 1497, 1466, 1455, 1366, 1279, 1190, 1115, 1100, 782  $\text{cm}^{-1}$ .

MS (ESI)  $m/z$  ( $\text{M}^+\text{+Na}$ ) calcd for  $\text{C}_{15}\text{H}_{24}\text{NaO}_2\text{S}$ : 291, found: 291.

$[\alpha]_{\text{D}}^{25} = -20.3^\circ$  ( $c = 1.01$ ,  $\text{CHCl}_3$ ).

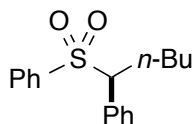

**(S)-1-(1-Phenylpentyl)sulfonylbenzene (Table 3, Entry 5).** ((1-Bromopentyl)sulfonyl)benzene (204 mg, 0.700 mmol) and phenylzinc iodide (0.910 mmol) were used. The product was purified by column chromatography (10% → 20%  $\text{Et}_2\text{O}$ /hexanes). White solid. First run: 195 mg (97%, 86% ee). Second run: 193 mg (96%, 83% ee).

The ee was determined by HPLC on a CHIRALCEL OD-H column (1% *i*-PrOH/hexanes, 1.0 mL/min) with  $t_r = 13.6$  min (major), 18.7 min (minor).

$^1\text{H}$  NMR (500 MHz,  $\text{CDCl}_3$ )  $\delta$  7.54–7.49 (m, 3H), 7.38–7.34 (m, 2H), 7.29–7.26 (m, 1H), 7.24–7.20 (m, 2H), 7.10–7.07 (m, 2H), 4.01 (dd, 1H,  $J = 11.6, 3.6$  Hz), 2.46–2.39 (m, 1H), 2.20–2.10 (m, 1H), 1.38–1.23 (m, 2H), 1.22–1.13 (m, 2H), 0.83 (t, 3H,  $J = 7.3$  Hz).

$^{13}\text{C}$  NMR (126 MHz,  $\text{CDCl}_3$ )  $\delta$  137.6, 133.5, 132.6, 130.0, 129.2, 128.8, 128.7, 128.6, 71.8, 29.0, 27.1, 22.4, 13.9.

FT-IR (neat) 2952, 2926, 2857, 1584, 1496, 1467, 1455, 1447, 1379, 1316, 1304, 1294, 1214, 1147, 1084, 1070, 1037, 1024, 998, 968, 800, 758, 713  $\text{cm}^{-1}$ .

MS (ESI)  $m/z$  ( $\text{M}^+ + \text{Na}$ ) calcd for  $\text{C}_{17}\text{H}_{20}\text{NaO}_2\text{S}$ : 311, found: 311.

$[\alpha]_{\text{D}}^{25} = -78^\circ$  ( $c = 1.08$ ,  $\text{CHCl}_3$ ).

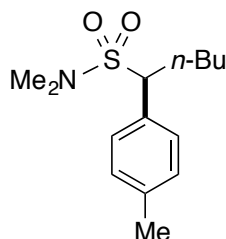

**(S)-N,N-Dimethyl-1-(*p*-tolyl)pentane-1-sulfonamide (Table 4, Entry 1).** 1-Bromo-*N,N*-dimethylpentane-1-sulfonamide (181 mg, 0.700 mmol) and *p*-tolylzinc iodide (0.910 mmol) were used. The product was purified by column chromatography (20%  $\text{Et}_2\text{O}$ /hexanes). Light-yellow oil. First run: 172 mg (91%, 96% ee). Second run: 165 mg (87%, 95% ee).

The ee was determined by HPLC on a CHIRALCEL OD-H column (2% *i*-PrOH/hexanes, 1.0 mL/min) with  $t_r = 8.1$  min (major), 10.1 min (minor).

$^1\text{H}$  NMR (500 MHz,  $\text{CDCl}_3$ )  $\delta$  7.30–7.27 (m, 2H), 7.19–7.17 (m, 2H), 4.05 (dd, 1H,  $J = 11.3, 3.8$  Hz), 2.54 (s, 6H), 2.36 (s, 3H), 2.29 (dddd, 1H,  $J = 13.7, 10.1, 6.4, 3.8$  Hz), 2.12 (dddd, 1H,  $J = 13.5, 11.4, 9.7, 5.3$  Hz), 1.38–1.22 (m, 2H), 1.22–1.09 (m, 2H), 0.83 (t, 3H,  $J = 7.3$  Hz).

$^{13}\text{C}$  NMR (126 MHz,  $\text{CDCl}_3$ )  $\delta$  138.8, 130.8, 129.6, 129.5, 67.4, 37.8, 29.6, 28.9, 22.4, 21.3, 13.9.

FT-IR (neat) 3025, 2956, 2932, 2872, 2811, 1515, 1479, 1457, 1413, 1380, 1331, 1283, 1204, 1141, 1107, 1062, 1022, 968, 843, 832, 716  $\text{cm}^{-1}$ .

MS (ESI)  $m/z$  ( $\text{M}^+ + \text{Na}$ ) calcd for  $\text{C}_{14}\text{H}_{23}\text{NNaO}_2\text{S}$ : 292, found: 292.

$[\alpha]_{\text{D}}^{25} = -30^\circ$  ( $c = 0.99$ ,  $\text{CHCl}_3$ ).

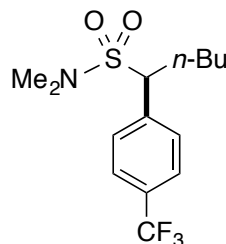

**(S)-N,N-Dimethyl-1-(4-(trifluoromethyl)phenyl)pentane-1-sulfonamide (Table 4, Entry 2).** An oven-dried 8-mL vial equipped with a magnetic stir bar was capped with a PTFE-lined septum cap, cooled under vacuum, and filled with nitrogen. 4-Iodobenzotrifluoride (248 mg,

0.910 mmol) and THF (1.35 mL) were added to the vial, followed by the dropwise addition over 1 min of *i*-PrMgCl (1.92 M in THF; 0.474 mL, 0.910 mmol), and the resulting mixture was stirred at r.t. for 1 h. An oven-dried 4-mL vial equipped with a magnetic stir bar was capped with a PTFE-lined septum cap, cooled under vacuum, and filled with nitrogen. ZnI<sub>2</sub> (290 mg, 0.910 mmol) was added into the vial. The vial was immediately evacuated and refilled with nitrogen (three cycles), and then THF (1.82 mL) was added to the vial. The solution of ZnI<sub>2</sub> was transferred by syringe to the Grignard reagent, and then the reaction mixture was stirred at r.t. for 30 min.

1-Bromo-*N,N*-dimethylpentane-1-sulfonamide (181 mg, 0.700 mmol) and (4-(trifluoromethyl)phenyl)zinc iodide (0.910 mmol) were used. The product was purified by column chromatography (20% Et<sub>2</sub>O/hexanes). Light-yellow solid. First run: 209 mg (92%, 98% ee). Second run: 216 mg (95%, 98% ee).

The ee was determined by HPLC on a CHIRALCEL OD-H column (3% *i*-PrOH/hexanes, 1.0 mL/min) with *t*<sub>r</sub> = 8.8 min (major), 12.0 min (minor).

<sup>1</sup>H NMR (500 MHz, CDCl<sub>3</sub>) δ 7.65 (d, 2H, *J* = 8.2 Hz), 7.55 (d, 2H, *J* = 8.2 Hz), 4.14 (dd, 1H, *J* = 11.4, 3.8 Hz), 2.58 (s, 6H), 2.32 (dddd, 1H, *J* = 13.9, 10.3, 6.3, 3.9 Hz), 2.14 (dddd, 1H, *J* = 13.7, 11.4, 10.1, 4.9 Hz), 1.38–1.24 (m, 2H), 1.22–1.06 (m, 2H), 0.84 (t, 3H, *J* = 7.3 Hz).

<sup>13</sup>C NMR (126 MHz, CDCl<sub>3</sub>) δ 138.2 (d, *J*<sub>CF</sub> = 1.3 Hz), 131.1 (q, *J*<sub>CF</sub> = 32.7 Hz), 130.0, 125.8 (q, *J*<sub>CF</sub> = 3.7 Hz), 123.6 (q, *J*<sub>CF</sub> = 272.2 Hz), 67.3, 37.8, 29.6, 28.8, 22.3, 13.8.

FT-IR (neat) 2958, 2875, 1325, 1167, 1122, 1069, 1019, 968, 856, 727 cm<sup>-1</sup>.

MS (ESI) *m/z* (M<sup>+</sup>+Na) calcd for C<sub>14</sub>H<sub>20</sub>F<sub>3</sub>NNaO<sub>2</sub>S: 346, found: 346.

[α]<sub>D</sub><sup>25</sup> = -23.3° (c = 1.02, CHCl<sub>3</sub>).

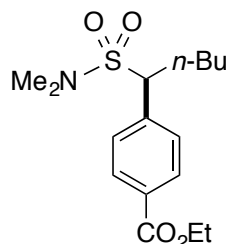

**Ethyl (S)-4-(1-(*N,N*-dimethylsulfamoyl)pentyl)benzoate (Table 4, Entry 3).** An oven-dried 8-mL vial equipped with a magnetic stir bar was capped with a PTFE-lined septum cap, cooled under vacuum, and then filled with nitrogen. Ethyl 4-iodobenzoate (251 mg, 0.910 mmol) was added to the vial, and then the vial was evacuated and refilled with nitrogen (three cycles). Next, THF (1.31 mL) was added to the vial, and the vial was wrapped with electrical tape and fitted with a nitrogen-filled balloon. Then, the reaction mixture was cooled to -20 °C. *i*-PrMgCl (1.78 M in THF; 0.511 mL, 0.910 mmol) was added over 1 min, and the mixture was stirred at -20 °C for 2 h. An oven-dried 4-mL vial equipped with a magnetic stir bar was capped with a PTFE-lined septum cap, cooled under vacuum, and filled with nitrogen. ZnI<sub>2</sub> (291 mg, 0.910 mmol) was added to the vial. The vial was immediately placed under vacuum and then filled with nitrogen. This evacuation-refill cycle was repeated three times, and then THF (1.82 mL) was added to the vial. The solution of ZnI<sub>2</sub> was transferred by syringe to the Grignard reagent,

and then the reaction mixture was stirred at  $-20\text{ }^{\circ}\text{C}$  for 30 min. The reaction mixture was allowed to warm to r.t. and stirred for an additional 30 min.

1-Bromo-*N,N*-dimethylpentane-1-sulfonamide (181 mg, 0.700 mmol) and (4-(ethoxycarbonyl)phenyl)zinc iodide (0.910 mmol) were used. The product was purified by column chromatography (20% ethyl acetate/hexanes). Colorless oil. First run: 229 mg (>99%, 97% ee). Second run: 229 mg (>99%, 97% ee).

The ee was determined by HPLC on a CHIRALCEL OD-H column (5% *i*-PrOH/hexanes, 1.0 mL/min) with  $t_r = 8.7$  min (major), 11.4 min (minor).

$^1\text{H}$  NMR (500 MHz,  $\text{CDCl}_3$ )  $\delta$  8.07–8.05 (m, 2H), 7.50–7.48 (m, 2H), 4.38 (q, 2H,  $J = 7.1$  Hz), 4.14 (dd, 1H,  $J = 11.3, 3.8$  Hz), 2.55 (s, 6H), 2.32 (dddd, 1H,  $J = 14.0, 10.2, 6.2, 3.8$  Hz), 2.16 (dddd, 1H,  $J = 13.6, 11.3, 10.0, 4.8$  Hz), 1.40 (t, 3H,  $J = 7.1$  Hz), 1.37–1.21 (m, 2H), 1.21–1.05 (m, 2H), 0.82 (t, 3H,  $J = 7.3$  Hz).

$^{13}\text{C}$  NMR (126 MHz,  $\text{CDCl}_3$ )  $\delta$  166.2, 139.0, 131.1, 130.0, 129.6, 67.5, 61.4, 37.9, 29.6, 28.9, 22.4, 14.5, 13.9.

FT-IR (neat) 2956, 2934, 2872, 2813, 1718, 1611, 1576, 1507, 1477, 1457, 1417, 1367, 1334, 1278, 1182, 1143, 1110, 1063, 1021, 968, 867, 799, 776, 753, 712  $\text{cm}^{-1}$ .

MS (ESI)  $m/z$  ( $\text{M}^+ - \text{SO}_2\text{NMe}_2$ ) calcd for  $\text{C}_{14}\text{H}_{19}\text{O}_2$ : 219, found: 219.

$[\alpha]_{\text{D}}^{25} = -36^{\circ}$  ( $c = 1.00, \text{CHCl}_3$ ).

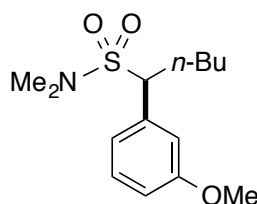

**(S)-1-(3-Methoxyphenyl)-*N,N*-dimethylpentane-1-sulfonamide (Table 4, Entry 4).** 1-Bromo-*N,N*-dimethylpentane-1-sulfonamide (181 mg, 0.700 mmol) and (3-methoxyphenyl)zinc iodide (0.910 mmol) were used. The product was purified by column chromatography (15% ethyl acetate/hexanes). White solid. First run: 175 mg (88%, 95% ee). Second run: 174 mg (87%, 96% ee).

The ee was determined by HPLC on a CHIRALCEL OD-H column (3% *i*-PrOH/hexanes, 1.0 mL/min) with  $t_r = 10.5$  min (major), 12.9 min (minor).

$^1\text{H}$  NMR (500 MHz,  $\text{CDCl}_3$ )  $\delta$  7.30–7.27 (m, 1H), 6.99–6.97 (m, 2H), 6.90–6.88 (m, 1H), 4.05 (dd, 1H,  $J = 11.3, 3.8$  Hz), 3.82 (s, 3H), 2.56 (s, 6H), 2.29 (dddd, 1H,  $J = 13.6, 10.2, 6.6, 3.8$  Hz), 2.12 (dddd, 1H,  $J = 13.5, 11.3, 9.8, 5.2$  Hz), 1.38–1.23 (m, 2H), 1.23–1.10 (m, 2H), 0.84 (t, 3H,  $J = 7.3$  Hz).

$^{13}\text{C}$  NMR (126 MHz,  $\text{CDCl}_3$ )  $\delta$  159.9, 135.4, 129.8, 122.0, 115.2, 114.2, 67.6, 55.5, 37.8, 29.7, 28.9, 22.4, 13.9.

FT-IR (neat) 3002, 2956, 2873, 2839, 1601, 1585, 1489, 1456, 1438, 1380, 1330, 1262, 1204, 1142, 1111, 1049, 968, 888, 806  $\text{cm}^{-1}$ .

MS (ESI)  $m/z$  ( $\text{M}^+ + \text{Na}$ ) calcd for  $\text{C}_{14}\text{H}_{23}\text{NNaO}_3\text{S}$ : 308, found: 308.

$[\alpha]_{\text{D}}^{25} = -28^{\circ}$  ( $c = 1.00, \text{CHCl}_3$ ).



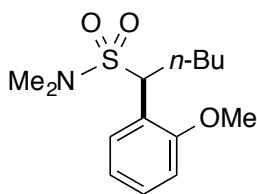

**(S)-1-(2-Methoxyphenyl)-N,N-dimethylpentane-1-sulfonamide (Table 4, Entry 5).** 1-Bromo-*N,N*-dimethylpentane-1-sulfonamide (181 mg, 0.700 mmol) and (2-methoxyphenyl)zinc iodide (1.05 mmol) were used. The product was purified by column chromatography on silica gel (10% → 15% ethyl acetate/hexanes) and then on C-18 silica gel (10% → 100% acetonitrile/water). Light-yellow oil. First run: 125 mg (63%, 96% ee). Second run: 128 mg (64%, 96% ee).

The ee was determined by HPLC on a CHIRALPAK AS-H column (5% *i*-PrOH/hexanes, 1.0 mL/min) with  $t_r$  = 16.6 min (major), 19.3 min (minor).

$^1\text{H}$  NMR (500 MHz,  $\text{CDCl}_3$ )  $\delta$  7.59 (dd, 1H,  $J$  = 7.8, 1.7 Hz), 7.30 (ddd, 1H,  $J$  = 8.2, 7.4, 1.7 Hz), 7.00 (ddd, 1H,  $J$  = 7.6, 7.6, 1.1 Hz), 6.91 (dd, 1H,  $J$  = 8.3, 1.1 Hz), 4.87 (dd, 1H,  $J$  = 11.4, 3.9 Hz), 3.87 (s, 3H), 2.51 (s, 6H), 2.32 (dddd, 1H,  $J$  = 13.7, 10.2, 6.4, 3.9 Hz), 2.13–2.05 (m, 1H), 1.36–1.22 (m, 2H), 1.22–1.07 (m, 2H), 0.83 (t, 3H,  $J$  = 7.3 Hz).

$^{13}\text{C}$  NMR (126 MHz,  $\text{CDCl}_3$ )  $\delta$  157.7, 129.7, 129.6, 122.2, 121.1, 110.5, 57.3, 55.8, 37.6, 29.7, 28.6, 22.4, 13.9.

FT-IR (neat) 3070, 3005, 2957, 2873, 1601, 1587, 1494, 1463, 1442, 1380, 1330, 1290, 1247, 1202, 1142, 1124, 1090, 1052, 1026, 967, 796, 756, 726  $\text{cm}^{-1}$ .

MS (ESI)  $m/z$  ( $\text{M}^+ + \text{Na}$ ) calcd for  $\text{C}_{14}\text{H}_{23}\text{NNaO}_3\text{S}$ : 308, found: 308.

$[\alpha]_D^{25} = +40^\circ$  ( $c$  = 1.03,  $\text{CHCl}_3$ ).

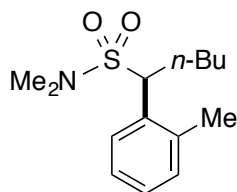

**(S)-N,N-Dimethyl-1-(*o*-tolyl)pentane-1-sulfonamide (Table 4, Entry 6).** 1-Bromo-*N,N*-dimethylpentane-1-sulfonamide (181 mg, 0.700 mmol) and *o*-tolylzinc iodide (1.05 mmol) were used. The product was purified by column chromatography (5% → 10% ethyl acetate/hexanes). Light-yellow oil. First run: 148 mg (78%, 97% ee). Second run: 149 mg (79%, 97% ee).

The ee was determined by HPLC on a CHIRALCEL OD-H column (2% *i*-PrOH/hexanes, 1.0 mL/min) with  $t_r$  = 9.8 min (major), 11.9 min (minor).

$^1\text{H}$  NMR (500 MHz,  $\text{CDCl}_3$ )  $\delta$  7.62–7.58 (m, 1H), 7.25–7.19 (m, 3H), 4.43 (dd, 1H,  $J$  = 11.3, 3.8 Hz), 2.60 (s, 6H), 2.39 (s, 3H), 2.33 (dddd, 1H,  $J$  = 13.6, 10.1, 6.1, 3.8 Hz), 2.16–2.08 (m, 1H), 1.37–1.22 (m, 2H), 1.21–1.06 (m, 2H), 0.83 (t, 3H,  $J$  = 7.3 Hz).

$^{13}\text{C}$  NMR (126 MHz,  $\text{CDCl}_3$ )  $\delta$  137.4, 132.3, 130.7, 128.4, 128.3, 126.6, 63.2, 38.0, 30.7, 28.7, 22.6, 20.1, 13.9.

FT-IR (neat) 3064, 3023, 2957, 2872, 2813, 1604, 1493, 1461, 1380, 1329, 1283, 1203, 1178, 1141, 1119, 1063, 967, 834, 802  $\text{cm}^{-1}$ .

MS (ESI)  $m/z$  ( $M^+ + \text{Na}$ ) calcd for  $\text{C}_{14}\text{H}_{23}\text{NNaO}_2\text{S}$ : 292, found: 292.

$[\alpha]_{\text{D}}^{25} = +7.9^\circ$  ( $c = 1.05$ ,  $\text{CHCl}_3$ ).

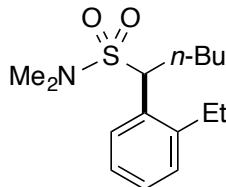

**(S)-1-(2-Ethylphenyl)-*N,N*-dimethylpentane-1-sulfonamide (Table 4, Entry 7).** 1-Bromo-*N,N*-dimethylpentane-1-sulfonamide (181 mg, 0.700 mmol), (2-ethylphenyl)zinc iodide (1.40 mmol),  $\text{NiCl}_2 \cdot \text{glyme}$  (30.8 mg, 0.140 mmol), and (*R,R*)-L1 (60.9 mg, 0.182 mmol) were used. The product was purified by column chromatography (first purification: 10% ethyl acetate/hexanes; second purification: 15%  $\rightarrow$  90% dichloromethane/hexanes). Light-yellow oil. First run: 178 mg (90%, 97% ee). Second run: 165 mg (83%, 97% ee).

The ee was determined by HPLC on a CHIRALPAK IC column (15% *i*-PrOH/hexanes, 1.0 mL/min) with  $t_r = 16.9$  min (minor), 22.7 min (major).

$^1\text{H}$  NMR (500 MHz,  $\text{CD}_2\text{Cl}_2$ )  $\delta$  7.57–7.54 (m, 1H), 7.30–7.22 (m, 3H), 4.46 (dd, 1H,  $J = 11.1, 4.0$  Hz), 2.79 (dq, 1H,  $J = 14.9, 7.5$  Hz), 2.68 (dq, 1H,  $J = 15.2, 7.6$  Hz), 2.62 (s, 6H), 2.29–2.22 (m, 1H), 2.15–2.07 (m, 1H), 1.39–1.24 (m, 2H), 1.22 (t, 3H,  $J = 7.6$  Hz), 1.24–1.15 (m, 1H), 1.13–1.04 (m, 1H), 0.84 (t, 3H,  $J = 7.3$  Hz).

$^{13}\text{C}$  NMR (126 MHz,  $\text{CD}_2\text{Cl}_2$ )  $\delta$  144.1, 131.9, 129.2, 128.7, 128.5, 126.5, 62.8, 38.0, 30.8, 29.3, 26.0, 23.0, 15.7, 13.9.

FT-IR (neat) 3063, 3021, 2959, 2933, 2873, 2813, 1490, 1455, 1378, 1330, 1282, 1201, 1177, 1141, 1120, 1062, 968, 803, 760  $\text{cm}^{-1}$ .

MS (ESI)  $m/z$  ( $M^+ + \text{Na}$ ) calcd for  $\text{C}_{15}\text{H}_{25}\text{NNaO}_2\text{S}$ : 306, found: 306.

$[\alpha]_{\text{D}}^{25} = +8.9^\circ$  ( $c = 1.03$ ,  $\text{CHCl}_3$ ).

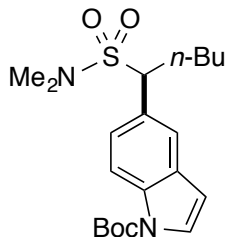

***tert*-Butyl (S)-5-(1-(*N,N*-dimethylsulfamoyl)pentyl)-1*H*-indole-1-carboxylate (Table 4, Entry 8).** An oven-dried 8-mL vial equipped with a magnetic stir bar was capped with a PTFE-lined septum cap, cooled under vacuum, and filled with nitrogen. *tert*-Butyl 5-iodo-1*H*-indole-1-carboxylate (360 mg, 1.05 mmol) was added to the vial, and then the vial was evacuated and refilled with nitrogen (three cycles). THF (1.56 mL) was added to the vial, and the vial was

wrapped with electrical tape and fitted with a nitrogen-filled balloon. Then, the reaction mixture was cooled to  $-20\text{ }^{\circ}\text{C}$ . *i*-PrMgCl (1.93 M in THF; 0.544 mL, 1.05 mmol) was added over 1 min, and the mixture was stirred at  $-20\text{ }^{\circ}\text{C}$  for 2 h. An oven-dried 4-mL vial equipped with a magnetic stir bar was capped with a PTFE-lined septum cap, cooled under vacuum, and filled with nitrogen.  $\text{ZnI}_2$  (338 mg, 1.06 mmol) was added to the vial. The vial was immediately placed under vacuum and then filled with nitrogen. This evacuation-refill cycle was repeated three times, and then THF (2.10 mL) was added to the vial. The solution of  $\text{ZnI}_2$  was transferred by syringe to the Grignard reagent, and then the reaction mixture was stirred at  $-20\text{ }^{\circ}\text{C}$  for 30 min. The reaction mixture was allowed to warm to r.t. and stirred for an additional 30 min.

1-Bromo-*N,N*-dimethylpentane-1-sulfonamide (181 mg, 0.700 mmol) and (1-(*tert*-butoxycarbonyl)-1*H*-indol-5-yl)zinc iodide (1.05 mmol) were used. The product was purified by column chromatography on silica gel (10%→15% ethyl acetate/hexanes) and then on C-18 silica gel (10%→100% acetonitrile/water). Yellow solid. First run: 180 mg (65%, 88% ee). Second run: 200 mg (72%, 90% ee).

The ee was determined by HPLC on a CHIRALCEL OD-H column (2% *i*-PrOH/hexanes, 1.0 mL/min) with  $t_r = 11.7$  min (major), 15.4 min (minor).

$^1\text{H}$  NMR (500 MHz,  $\text{CDCl}_3$ )  $\delta$  8.14 (d, 1H,  $J = 8.5$  Hz), 7.63–7.62 (m, 2H), 7.33 (dd, 1H,  $J = 8.6, 1.8$  Hz), 6.58 (dd, 1H,  $J = 3.7, 0.8$  Hz), 4.18 (dd, 1H,  $J = 11.4, 3.8$  Hz), 2.51 (s, 6H), 2.36 (dddd, 1H,  $J = 13.7, 10.2, 6.4, 3.8$  Hz), 2.20 (dddd, 1H,  $J = 13.6, 11.4, 10.0, 5.0$  Hz), 1.68 (s, 9H), 1.38–1.23 (m, 2H), 1.22–1.08 (m, 2H), 0.82 (t, 3H,  $J = 7.3$  Hz).

$^{13}\text{C}$  NMR (126 MHz,  $\text{CDCl}_3$ )  $\delta$  149.7, 135.4, 130.9, 128.0, 126.9, 125.7, 121.9, 115.4, 107.4, 84.2, 67.6, 37.9, 29.9, 28.9, 28.3, 22.4, 13.9.

FT-IR (neat) 3152, 3120, 2956, 2934, 2873, 1736, 1536, 1470, 1445, 1374, 1351, 1329, 1256, 1218, 1193, 1164, 1138, 1107, 1084, 1042, 1024, 968, 841, 768, 729  $\text{cm}^{-1}$ .

MS (ESI)  $m/z$  ( $\text{M}^+ + \text{Na}$ ) calcd for  $\text{C}_{20}\text{H}_{30}\text{N}_2\text{NaO}_4\text{S}$ : 417, found: 417.

$[\alpha]_D^{25} = -23.7^{\circ}$  ( $c = 1.04, \text{CHCl}_3$ ).

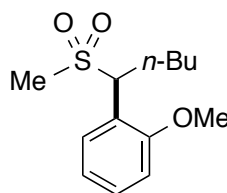

**(S)-1-Methoxy-2-(1-(methylsulfonyl)pentyl)benzene (Table 4, Entry 9).** 1-Bromo-1-(methylsulfonyl)pentane (160 mg, 0.700 mmol) and (2-methoxyphenyl)zinc iodide (0.910 mmol) were used. The product was purified by column chromatography (20%→25% ethyl acetate/hexanes). Colorless oil. First run: 148 mg (82%, 96% ee). Second run: 154 mg (86%, 96% ee).

The ee was determined by HPLC on a CHIRALCEL OD-H column (5% *i*-PrOH/hexanes, 1.0 mL/min) with  $t_r = 17.6$  min (minor), 18.9 min (major).

$^1\text{H}$  NMR (500 MHz,  $\text{CDCl}_3$ )  $\delta$  7.52 (dd, 1H,  $J = 7.8, 1.7$  Hz), 7.34 (ddd, 1H,  $J = 8.3, 7.4, 1.7$  Hz), 7.04 (ddd, 1H,  $J = 7.6, 7.6, 1.1$  Hz), 6.93 (dd, 1H,  $J = 8.3, 1.1$  Hz), 4.81 (dd, 1H,  $J = 11.5, 3.9$  Hz),

3.87 (s, 3H), 2.58 (s, 3H), 2.40 (dddd, 1H,  $J = 13.5, 9.6, 6.9, 3.9$  Hz), 2.05 (dddd, 1H,  $J = 13.5, 11.5, 9.4, 5.3$  Hz), 1.38–1.24 (m, 2H), 1.23–1.12 (m, 2H), 0.84 (t, 3H,  $J = 7.3$  Hz).

$^{13}\text{C}$  NMR (126 MHz,  $\text{CDCl}_3$ )  $\delta$  157.6, 130.1, 129.2, 121.7, 121.6, 110.9, 60.4, 55.9, 38.6, 28.7, 25.9, 22.4, 13.9.

FT-IR (neat) 3009, 2957, 2872, 1601, 1587, 1494, 1464, 1440, 1412, 1380, 1296, 1247, 1192, 1164, 1137, 1090, 1051, 1025, 956, 792, 755  $\text{cm}^{-1}$ .

MS (ESI)  $m/z$  ( $\text{M}^+ + \text{Na}$ ) calcd for  $\text{C}_{13}\text{H}_{20}\text{NaO}_3\text{S}$ : 279, found: 279.

$[\alpha]_{\text{D}}^{25} = +61^\circ$  ( $c = 1.00$ ,  $\text{CHCl}_3$ ).

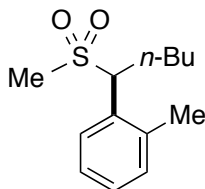

**(S)-1-Methyl-2-(1-(methylsulfonyl)pentyl)benzene (Table 4, Entry 10).** 1-Bromo-1-(methylsulfonyl)pentane (160 mg, 0.700 mmol) and *o*-tolylzinc iodide (0.910 mmol) were used. The product was purified by column chromatography (15% → 20% ethyl acetate/hexanes). Colorless oil. First run: 137 mg (81%, 97% ee). Second run: 134 mg (80%, 97% ee).

The ee was determined by HPLC on a CHIRALPAK AS-H column (10% *i*-PrOH/hexanes, 1.0 mL/min) with  $t_r = 18.4$  min (minor), 28.0 min (major).

$^1\text{H}$  NMR (500 MHz,  $\text{CD}_2\text{Cl}_2$ )  $\delta$  7.52–7.50 (m, 1H), 7.30–7.23 (m, 3H), 4.37 (dd, 1H,  $J = 11.4, 3.7$  Hz), 2.61 (s, 3H), 2.40 (s, 3H), 2.37–2.31 (m, 1H), 2.12–2.04 (m, 1H), 1.40–1.24 (m, 2H), 1.24–1.10 (m, 2H), 0.84 (t, 3H,  $J = 7.3$  Hz).

$^{13}\text{C}$  NMR (126 MHz,  $\text{CD}_2\text{Cl}_2$ )  $\delta$  138.4, 132.0, 131.2, 129.0, 127.9, 127.1, 65.0, 38.7, 29.1, 28.5, 22.8, 20.3, 13.9.

FT-IR (neat) 3025, 2957, 2931, 2872, 1493, 1464, 1411, 1380, 1294, 1224, 1208, 1177, 1138, 1113, 1051, 958, 825, 796, 771, 736  $\text{cm}^{-1}$ .

MS (ESI)  $m/z$  ( $\text{M}^+ + \text{Na}$ ) calcd for  $\text{C}_{13}\text{H}_{20}\text{NaO}_2\text{S}$ : 263, found: 263.

$[\alpha]_{\text{D}}^{25} = +24.2^\circ$  ( $c = 0.99$ ,  $\text{CHCl}_3$ ).

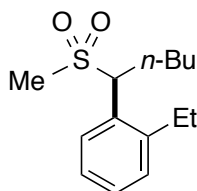

**(S)-1-Ethyl-2-(1-(methylsulfonyl)pentyl)benzene (Table 4, Entry 11).** 1-Bromo-1-(methylsulfonyl)pentane (160 mg, 0.700 mmol), (2-ethylphenyl)zinc iodide (1.40 mmol),  $\text{NiCl}_2 \cdot \text{glyme}$  (30.8 mg, 0.140 mmol), and (*R,R*)-L1 (60.9 mg, 0.182 mmol) were used. The product was purified by column chromatography (15% ethyl acetate/hexanes). Light-yellow oil. First run: 145 mg (81%, 98% ee). Second run: 146 mg (82%, 98% ee).

The ee was determined by HPLC on a CHIRALPAK AS-H column (10% *i*-PrOH/hexanes, 1.0 mL/min) with  $t_r = 13.1$  min (minor), 22.1 min (major).

$^1\text{H}$  NMR (500 MHz,  $\text{CD}_2\text{Cl}_2$ )  $\delta$  7.52–7.51 (m, 1H), 7.34–7.26 (m, 3H), 4.41 (dd, 1H,  $J = 11.2, 3.9$  Hz), 2.82–2.75 (m, 1H), 2.73–2.66 (m, 1H), 2.62 (s, 3H), 2.35 (dddd, 1H,  $J = 13.5, 11.0, 5.7, 3.8$  Hz), 2.12–2.04 (m, 1H), 1.41–1.20 (m, 3H), 1.23 (t, 3H,  $J = 7.6$  Hz), 1.19–1.09 (m, 1H), 0.85 (t, 3H,  $J = 7.2$  Hz).

$^{13}\text{C}$  NMR (126 MHz,  $\text{CD}_2\text{Cl}_2$ )  $\delta$  144.4, 131.2, 129.6, 129.1, 127.9, 126.9, 64.5, 38.8, 29.3, 28.7, 26.2, 23.0, 15.7, 13.9.

FT-IR (neat) 3063, 3026, 2960, 2932, 2873, 1491, 1453, 1411, 1379, 1294, 1218, 1176, 1138, 1113, 1061, 958, 831, 797, 757  $\text{cm}^{-1}$ .

MS (ESI)  $m/z$  ( $\text{M}^+ + \text{Na}$ ) calcd for  $\text{C}_{14}\text{H}_{22}\text{NaO}_2\text{S}$ : 277, found: 277.

$[\alpha]_{\text{D}}^{25} = +24.1^\circ$  ( $c = 1.01$ ,  $\text{CHCl}_3$ ).

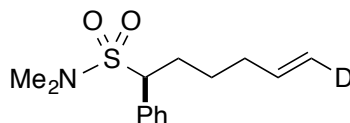

**(*S,E*)-*N,N*-Dimethyl-1-phenylhex-5-ene-1-sulfonamide-6-*d* (eq 3).** White solid.

The ee was determined by HPLC on a CHIRALCEL OD-H column (1% *i*-PrOH/hexanes, 1.0 mL/min) with  $t_r = 13.9$  min (major), 17.4 min (minor).

$^1\text{H}$  NMR (500 MHz,  $\text{CDCl}_3$ )  $\delta$  7.42–7.34 (m, 5H), 5.70 (dt, 1H,  $J = 17.0, 6.5$  Hz), 4.95 (dt, 1H,  $J = 17.1, 1.6$  Hz), 4.09 (dd, 1H,  $J = 11.2, 3.9$  Hz), 2.53 (s, 6H), 2.32 (dddd, 1H,  $J = 13.9, 10.3, 6.4, 3.9$  Hz), 2.20–2.12 (m, 1H), 2.10–1.98 (m, 2H), 1.36–1.22 (m, 2H).

$^{13}\text{C}$  NMR (126 MHz,  $\text{CDCl}_3$ )  $\delta$  137.8, 134.0, 129.6, 129.0, 128.9, 115.0 (t,  $J = 24$  Hz), 67.8, 37.8, 33.3, 29.5, 26.2.

FT-IR (neat) 3088, 3065, 3024, 2926, 2860, 2822, 2261, 1623, 1496, 1480, 1456, 1436, 1326, 1292, 1256, 1200, 1140, 1064, 1043, 984, 970, 917, 906, 822, 799, 778, 745  $\text{cm}^{-1}$ .

MS (EI)  $m/z$  ( $\text{M}^+ - \text{SO}_2\text{NMe}_2$ ) calcd for  $\text{C}_{12}\text{H}_{14}\text{D}$ : 160, found: 160.

$[\alpha]_{\text{D}}^{25} = -34^\circ$  ( $c = 0.99$ ,  $\text{CHCl}_3$ ); 96% ee.

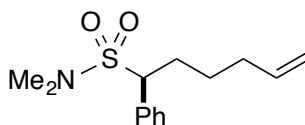

**(*S*)-*N,N*-Dimethyl-1-phenylhex-5-ene-1-sulfonamide (Figure 1).** White solid.

The ee was determined by HPLC on a CHIRALCEL OD-H column (1% *i*-PrOH/hexanes, 1.0 mL/min) with  $t_r = 14.1$  min (major), 17.8 min (minor).

$^1\text{H}$  NMR (500 MHz,  $\text{CDCl}_3$ )  $\delta$  7.42–7.34 (m, 5H), 5.70 (ddt, 1H,  $J = 17.0, 10.3, 6.7$  Hz), 4.98–4.92 (m, 2H), 4.09 (dd, 1H,  $J = 11.2, 3.9$  Hz), 2.53 (s, 6H), 2.32 (dddd, 1H,  $J = 14.1, 10.3, 6.3, 3.9$  Hz), 2.20–2.12 (m, 1H), 2.10–1.98 (m, 2H), 1.36–1.22 (m, 2H).

$^{13}\text{C}$  NMR (126 MHz,  $\text{CDCl}_3$ )  $\delta$  138.0, 134.0, 129.6, 129.0, 128.9, 115.3, 67.8, 37.8, 33.4, 29.5, 26.2.

FT-IR (neat) 3067, 3033, 2934, 2908, 2868, 2821, 1640, 1497, 1480, 1455, 1417, 1329, 1282, 1199, 1141, 1063, 1043, 993, 966, 916, 906, 870, 814, 781, 746, 735  $\text{cm}^{-1}$ .

MS (EI)  $m/z$  ( $\text{M}^+ - \text{SO}_2\text{NMe}_2$ ) calcd for  $\text{C}_{12}\text{H}_{15}$ : 159, found: 159.

$[\alpha]_{\text{D}}^{25} = -33^\circ$  ( $c = 0.82$ ,  $\text{CHCl}_3$ ); 97% ee.

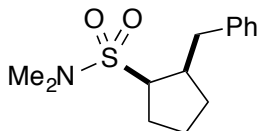

***syn*-2-Benzyl-*N,N*-dimethylcyclopentane-1-sulfonamide (Figure 1).** White solid.

$^1\text{H}$  NMR (500 MHz,  $\text{CD}_2\text{Cl}_2$ )  $\delta$  7.30–7.26 (m, 2H), 7.20–7.16 (m, 3H), 3.54 (ddd, 1H,  $J = 8.7, 8.7, 6.3$  Hz), 3.31–3.25 (m, 1H), 2.89 (s, 6H), 2.60–2.52 (m, 2H), 2.15–2.07 (m, 1H), 2.04–1.97 (m, 1H), 1.95–1.87 (m, 1H), 1.66–1.44 (m, 3H).

$^{13}\text{C}$  NMR (126 MHz,  $\text{CD}_2\text{Cl}_2$ )  $\delta$  141.8, 129.4, 128.6, 126.2, 62.8, 44.7, 37.8, 35.7, 29.7, 26.8, 22.7.

FT-IR (neat) 3084, 3060, 3024, 2922, 2874, 2850, 2806, 1602, 1583, 1495, 1473, 1452, 1332, 1273, 1195, 1136, 1073, 1058, 1029, 958, 845, 822, 727  $\text{cm}^{-1}$ .

MS (EI)  $m/z$  ( $\text{M}^+$ ) calcd for  $\text{C}_{14}\text{H}_{21}\text{NO}_2\text{S}$ : 267, found: 267.

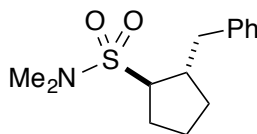

***anti*-2-Benzyl-*N,N*-dimethylcyclopentane-1-sulfonamide (Figure 1).** Colorless oil.

$^1\text{H}$  NMR (500 MHz,  $\text{CD}_2\text{Cl}_2$ )  $\delta$  7.32–7.28 (m, 2H), 7.22–7.19 (m, 3H), 3.20 (ddd, 1H,  $J = 8.9, 6.1, 6.1$  Hz), 2.97 (dd, 1H,  $J = 12.6, 4.9$  Hz), 2.78 (s, 6H), 2.65–2.53 (m, 2H), 2.08–1.95 (m, 2H), 1.82–1.74 (m, 1H), 1.73–1.61 (m, 2H), 1.42–1.35 (m, 1H).

$^{13}\text{C}$  NMR (126 MHz,  $\text{CD}_2\text{Cl}_2$ )  $\delta$  140.7, 129.6, 128.7, 126.5, 64.5, 43.6, 41.3, 37.8, 32.1, 28.5, 24.9.

FT-IR (neat) 3084, 3060, 3025, 2917, 2849, 1602, 1583, 1494, 1461, 1453, 1435, 1315, 1199, 1136, 1082, 1059, 1029, 960, 882, 849, 733  $\text{cm}^{-1}$ .

MS (EI)  $m/z$  ( $\text{M}^+$ ) calcd for  $\text{C}_{14}\text{H}_{21}\text{NO}_2\text{S}$ : 267, found: 267.

#### IV. Enantioselective Alkenylations

**General Procedure.**  $\text{Cp}_2\text{ZrHCl}$  (Schwartz's reagent; 258 mg, 1.00 mmol) was added to an oven-dried 4-mL vial equipped with a magnetic stir bar, and then the vial was capped with a PTFE-lined septum cap. The vial was evacuated and refilled with nitrogen (three cycles). 1,2-Dimethoxyethane (1.00 ml) was added to the vial, followed by the alkyne (1.00 mmol). The reaction mixture was stirred at r.t. for 1.5 h, at which time it had become homogenous. An oven-dried 20-mL vial equipped with a magnetic stir bar was charged with  $\text{NiCl}_2 \cdot \text{glyme}$  (11.0 mg, 0.050 mmol), (3*R*,8*S*)-L6 (23.3 mg, 0.065 mmol), and the electrophile (0.500 mmol). The vial

was sealed with a PTFE-lined septum cap, placed under vacuum, and then filled with nitrogen. This evacuation-refill cycle was repeated three times. 1,2-Dimethoxyethane (2.57 mL) was added, and the mixture was stirred at r.t. for 1 h. The solution of the nucleophile was transferred by syringe over 2 min to the vial that contained the electrophile. The reaction mixture was stirred at r.t. for 24 h, and then the reaction was quenched by the addition of ethanol (0.50 mL). The solution was filtered through a pad of silica (eluted with Et<sub>2</sub>O). The filtrate was concentrated, and the resulting residue was purified by column chromatography.

A second run was conducted with (3*S*,8*R*)-L6.

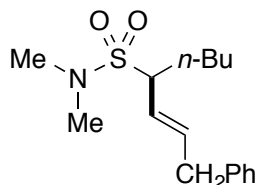

**(*S,E*)-*N,N*-Dimethyl-1-phenyloct-2-ene-4-sulfonamide (Table 5, Entry 1).** 1-Bromo-*N,N*-dimethylpentane-1-sulfonamide (129 mg, 0.500 mmol) and (*E*)-(3-phenylprop-1-en-1-yl)zirconium reagent (1.00 mmol) were used. The product was purified by column chromatography on silica gel (15% ethyl acetate/hexanes). Colorless oil. First run: 116 mg (79%, 91% ee). Second run: 122 mg (83%, 90% ee).

The ee was determined by HPLC on a CHIRALCEL OJ-H column (5% *i*-PrOH/hexanes, 1.0 mL/min) with  $t_r = 18.2$  min (major), 20.9 min (minor).

<sup>1</sup>H NMR (500 MHz, CDCl<sub>3</sub>)  $\delta$  7.32–7.28 (m, 2H), 7.24–7.20 (m, 1H), 7.18–7.15 (m, 2H), 5.87 (dddd, 1H,  $J = 15.3, 6.9, 6.9, 0.4$  Hz), 5.44 (dddd, 1H,  $J = 15.3, 9.7, 1.5, 1.5$  Hz), 3.57 (ddd, 1H,  $J = 10.5, 10.5, 3.5$  Hz), 3.49–3.39 (m, 2H), 2.82 (s, 6H), 2.04–1.97 (m, 1H), 1.75–1.68 (m, 1H), 1.41–1.18 (m, 4H), 0.89 (t, 3H,  $J = 7.1$  Hz).

<sup>13</sup>C NMR (126 MHz, CDCl<sub>3</sub>)  $\delta$  139.3, 136.9, 128.7, 128.6, 126.5, 125.1, 65.8, 39.1, 38.3, 28.8, 28.7, 22.4, 14.0.

FT-IR (neat) 3061, 3027, 2954, 2930, 2871, 1663, 1603, 1494, 1453, 1379, 1329, 1281, 1198, 1139, 1076, 1062, 1029, 966, 804, 747, 730 cm<sup>-1</sup>.

MS (EI)  $m/z$  ( $M^+ - \text{SO}_2\text{NMe}_2$ ) calcd for C<sub>14</sub>H<sub>19</sub>: 187, found: 187.

$[\alpha]_D^{25} = +22.9^\circ$  ( $c = 1.01$ , CHCl<sub>3</sub>).

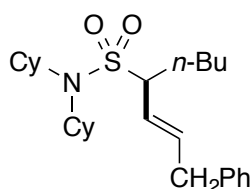

**(*S,E*)-*N,N*-Dicyclohexyl-1-phenyloct-2-ene-4-sulfonamide (Table 5, Entry 2).** 1-Bromo-*N,N*-dicyclohexylpentane-1-sulfonamide (197 mg, 0.500 mmol) and (*E*)-(3-phenylprop-1-en-1-yl)zirconium reagent (1.00 mmol) were used. The product was purified by column chromatography on silica gel (5% Et<sub>2</sub>O/hexanes) and then on C-18 silica gel (10%→100%

acetonitrile/water). Viscous light-yellow oil. First run: 179 mg (83%, 95% ee). Second run: 180 mg (83%, 94% ee).

The ee was determined by HPLC on a CHIRALPAK AD-H column (1% *i*-PrOH/hexanes, 0.6 mL/min) with  $t_r$  = 16.6 min (major), 17.7 min (minor).

$^1\text{H}$  NMR (500 MHz,  $\text{CD}_2\text{Cl}_2$ )  $\delta$  7.31–7.28 (m, 2H), 7.22–7.17 (m, 3H), 5.80 (dddd, 1H,  $J$  = 15.3, 7.4, 6.0, 0.4 Hz), 5.42 (dddd, 1H,  $J$  = 15.4, 9.8, 1.5, 1.5 Hz), 3.48–3.38 (m, 2H), 3.33 (ddd, 1H,  $J$  = 10.8, 10.0, 3.2 Hz), 3.17–3.10 (m, 2H), 2.04–1.97 (m, 1H), 1.79–1.56 (m, 15H), 1.41–1.16 (m, 8H), 1.08 (qt, 2H,  $J$  = 13.1, 3.4 Hz), 0.89 (t, 3H,  $J$  = 7.2 Hz).

$^{13}\text{C}$  NMR (126 MHz,  $\text{CD}_2\text{Cl}_2$ )  $\delta$  140.1, 136.6, 128.9, 128.8, 126.6, 126.0, 69.0, 58.4, 39.2, 34.0, 33.1, 29.5, 29.3, 26.99, 26.97, 25.8, 22.7, 14.1.

FT-IR (neat) 3084, 3062, 3027, 2931, 2855, 1603, 1495, 1466, 1453, 1401, 1381, 1322, 1274, 1256, 1188, 1164, 1139, 1108, 1074, 1047, 1028, 981, 895, 854, 823, 750  $\text{cm}^{-1}$ .

MS (ESI)  $m/z$  ( $\text{M}^+ + \text{Na}$ ) calcd for  $\text{C}_{26}\text{H}_{41}\text{NNaO}_2\text{S}$ : 454, found: 454.

$[\alpha]_{\text{D}}^{25} = -6.9^\circ$  ( $c$  = 1.02,  $\text{CHCl}_3$ ).

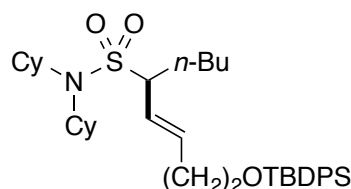

**(*S,E*)-1-((*tert*-Butyldiphenylsilyl)oxy)-*N,N*-dicyclohexylnon-3-ene-5-sulfonamide (Table 5, Entry 3).** 1-Bromo-*N,N*-dicyclohexylpentane-1-sulfonamide (197 mg, 0.500 mmol) and (*E*)-(4-((*tert*-butyldiphenylsilyl)oxy)but-1-en-1-yl)zirconium reagent (1.00 mmol) were used. The product was purified by column chromatography on silica gel (3% ethyl acetate/hexanes) and then on C-18 silica gel (10%→100% acetonitrile/water). Viscous light-yellow oil. First run: 254 mg (81%, 95% ee). Second run: 259 mg (83%, 94% ee).

The ee was determined by HPLC on a CHIRALPAK AD-H column (0.5% *i*-PrOH/hexanes, 0.8 mL/min) with  $t_r$  = 14.6 min (minor), 17.9 min (major).

$^1\text{H}$  NMR (500 MHz,  $\text{CDCl}_3$ )  $\delta$  7.67–7.64 (m, 4H), 7.45–7.41 (m, 2H), 7.40–7.36 (m, 4H), 5.69 (ddd, 1H,  $J$  = 15.5, 6.4, 6.4 Hz), 5.42 (dddd, 1H,  $J$  = 15.5, 9.7, 1.4, 1.4 Hz), 3.75–3.68 (m, 2H), 3.26 (ddd, 1H,  $J$  = 10.6, 9.5, 3.2 Hz), 3.15–3.09 (m, 2H), 2.39–2.29 (m, 2H), 2.08–2.01 (m, 1H), 1.76–1.57 (m, 14H), 1.39–1.14 (m, 9H), 1.12–1.02 (m, 2H), 1.05 (s, 9H), 0.86 (t, 3H,  $J$  = 7.2 Hz).

$^{13}\text{C}$  NMR (126 MHz,  $\text{CDCl}_3$ )  $\delta$  135.7, 135.6, 134.3, 133.9, 133.8, 129.79, 129.78, 127.79, 127.78, 126.10, 69.5, 63.2, 58.2, 36.0, 33.9, 32.8, 29.3, 29.0, 26.9, 26.7, 25.5, 22.5, 19.3, 14.0.

FT-IR (neat) 3071, 3048, 2931, 2856, 1590, 1471, 1453, 1428, 1389, 1323, 1257, 1221, 1188, 1164, 1138, 1110, 1048, 1028, 998, 980, 939, 895, 854, 822, 764, 738  $\text{cm}^{-1}$ .

MS (ESI)  $m/z$  ( $\text{M}^+ + \text{Na}$ ) calcd for  $\text{C}_{37}\text{H}_{57}\text{NNaO}_3\text{SSi}$ : 646, found: 646.

$[\alpha]_{\text{D}}^{25} = +1.7^\circ$  ( $c$  = 0.99,  $\text{CHCl}_3$ ).



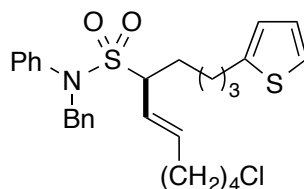

**(*S,E*)-*N*-Benzyl-11-chloro-*N*-phenyl-1-(thiophen-2-yl)undec-6-ene-5-sulfonamide (Table 5, Entry 4).** *N*-Benzyl-1-bromo-*N*-phenyl-5-(thiophen-2-yl)pentane-1-sulfonamide (239 mg, 0.500 mmol) and (*E*)-(6-chlorohex-1-en-1-yl)zirconium reagent (1.00 mmol) were used. The product was purified by column chromatography (first purification: 5% ethyl acetate/hexanes; second purification: 15% cyclopentyl methyl ether/hexanes). Viscous light-yellow oil. First run: 165 mg (64%, 80% ee). Second run: 156 mg (60%, 81% ee).

The ee was determined by HPLC on a CHIRALPAK AD-H column (10% *i*-PrOH/hexanes, 0.8 mL/min) with  $t_r = 17.5$  min (major), 23.8 min (minor).

$^1\text{H}$  NMR (500 MHz,  $\text{CD}_2\text{Cl}_2$ )  $\delta$  7.32–7.28 (m, 2H), 7.27–7.19 (m, 8H), 7.12 (dd, 1H,  $J = 5.1, 1.2$  Hz), 6.91 (dd, 1H,  $J = 5.1, 3.4$  Hz), 6.77 (dddd, 1H,  $J = 3.3, 1.0, 1.0, 1.0$  Hz), 5.80 (ddd, 1H,  $J = 15.3, 6.8, 6.8$  Hz), 5.46 (dddd, 1H,  $J = 15.4, 9.7, 1.5, 1.5$  Hz), 4.99 (d, 1H,  $J = 15.1$  Hz), 4.67 (d, 1H,  $J = 15.1$  Hz), 3.60–3.55 (m, 1H), 3.58 (t, 2H,  $J = 6.6$  Hz), 2.87–2.76 (m, 2H), 2.26–2.13 (m, 2H), 2.04 (dddd, 1H,  $J = 13.6, 9.9, 6.3, 3.4$  Hz), 1.86–1.72 (m, 3H), 1.72–1.56 (m, 4H), 1.50–1.41 (m, 1H), 1.32–1.22 (m, 1H).

$^{13}\text{C}$  NMR (126 MHz,  $\text{CD}_2\text{Cl}_2$ )  $\delta$  145.6, 139.7, 139.0, 137.3, 129.4, 129.3, 128.7, 128.6, 127.9, 127.8, 127.0, 124.5, 124.2, 123.2, 66.7, 56.7, 45.4, 32.5, 32.2, 31.6, 29.9, 29.2, 26.5, 26.2.

FT-IR (neat) 3064, 3032, 2933, 2860, 1595, 1493, 1454, 1337, 1216, 1145, 1093, 1065, 1028, 976, 916, 862, 775  $\text{cm}^{-1}$ .

MS (ESI)  $m/z$  ( $\text{M}^+ + \text{Na}$ ) calcd for  $\text{C}_{28}\text{H}_{34}\text{ClNNaO}_2\text{S}_2$ : 538, found: 538.

$[\alpha]_D^{25} = -23.0^\circ$  ( $c = 1.03, \text{CHCl}_3$ ).

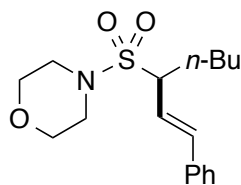

**(*S,E*)-4-((1-Phenylhept-1-en-3-yl)sulfonyl)morpholine (Table 5, Entry 5).** 4-((1-Bromopentyl)sulfonyl)morpholine (150 mg, 0.500 mmol), and (*E*)-styrylzirconium reagent (1.00 mmol) were used. The product was purified by column chromatography (15% ethyl acetate/hexanes). White solid. First run: 110 mg (68%, 97% ee). Second run: 110 mg (68%, 95% ee).

The ee was determined by HPLC on a CHIRALPAK AS-H column (10% *i*-PrOH/hexanes, 1.0 mL/min) with  $t_r = 18.7$  min (minor), 30.1 min (major).

$^1\text{H}$  NMR (500 MHz,  $\text{CDCl}_3$ )  $\delta$  7.42–7.39 (m, 2H), 7.38–7.34 (m, 2H), 7.32–7.29 (m, 1H), 6.62 (d, 1H,  $J = 15.9$  Hz), 6.06 (dd, 1H,  $J = 15.9, 9.8$  Hz), 3.70–3.62 (m, 5H), 3.38–3.30 (m, 4H), 2.17–2.10 (m, 1H), 1.87–1.79 (m, 1H), 1.45–1.22 (m, 4H), 0.90 (t, 3H,  $J = 7.0$  Hz).

$^{13}\text{C}$  NMR (126 MHz,  $\text{CDCl}_3$ )  $\delta$  137.0, 135.7, 129.0, 128.7, 126.7, 122.7, 67.1, 67.0, 46.8, 29.0, 28.8, 22.4, 14.0.

FT-IR (neat) 2958, 2923, 2859, 1450, 1339, 1324, 1260, 1148, 1114, 1073, 955, 743  $\text{cm}^{-1}$ .

MS (ESI)  $m/z$  ( $\text{M}^+ + \text{Na}$ ) calcd for  $\text{C}_{17}\text{H}_{25}\text{NNaO}_3\text{S}$ : 346, found: 346.

$[\alpha]_{\text{D}}^{25} = -82^\circ$  ( $c = 0.98$ ,  $\text{CHCl}_3$ ).

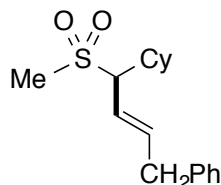

**(S,E)-(4-Cyclohexyl-4-(methylsulfonyl)but-2-en-1-yl)benzene (Table 5, Entry 6).**

(Bromo(methylsulfonyl)methyl)cyclohexane (179 mg, 0.700 mmol), (E)-(3-phenylprop-1-en-1-yl)zirconium reagent (1.40 mmol), and (R,R)-L1 (30.4 mg, 0.091 mmol) were used. The product was purified by column chromatography (15% ethyl acetate/hexanes). Light-yellow oil. First run: 109 mg (53%, 93% ee). Second run: 98 mg (48%, 93% ee).

The ee was determined by HPLC on a CHIRALPAK IB-3 column (5% *i*-PrOH/hexanes, 1.0 mL/min) with  $t_r = 13.0$  min (minor), 22.9 min (major).

$^1\text{H}$  NMR (500 MHz,  $\text{CDCl}_3$ )  $\delta$  7.33–7.30 (m, 2H), 7.25–7.21 (m, 1H), 7.18–7.16 (m, 2H), 5.89 (ddd, 1H,  $J = 15.2, 6.9, 6.9$  Hz), 5.71 (dddd, 1H,  $J = 15.3, 10.4, 1.4, 1.4$  Hz), 3.48 (d, 2H,  $J = 6.9$  Hz), 3.29 (dd, 1H,  $J = 10.4, 3.8$  Hz), 2.76 (s, 3H), 2.32 (tq, 1H,  $J = 11.9, 3.5$  Hz), 2.08–2.02 (m, 1H), 1.78–1.72 (m, 2H), 1.70–1.61 (m, 2H), 1.40–1.26 (m, 2H), 1.23–1.07 (m, 3H).

$^{13}\text{C}$  NMR (126 MHz,  $\text{CDCl}_3$ )  $\delta$  139.2, 139.0, 128.8, 128.6, 126.6, 122.6, 73.2, 39.8, 39.3, 36.0, 32.2, 28.9, 26.4, 26.1, 26.0.

FT-IR (neat) 3083, 3060, 3026, 2927, 2852, 1660, 1602, 1494, 1452, 1411, 1351, 1295, 1240, 1173, 1133, 1077, 1029, 978, 894, 852, 784, 751, 700  $\text{cm}^{-1}$ .

MS (ESI)  $m/z$  ( $\text{M}^+ + \text{Na}$ ) calcd for  $\text{C}_{17}\text{H}_{24}\text{NaO}_2\text{S}$ : 315, found: 315.

$[\alpha]_{\text{D}}^{25} = +60.8^\circ$  ( $c = 1.00$ ,  $\text{CHCl}_3$ ).

## V. Determination of Absolute Stereochemistry

Product from entry 7 of Table 2 (run with (S,S)-L1). (*R*)-5-((*tert*-Butyldimethylsilyl)oxy)-*N,N*-dimethyl-1-phenylpentane-1-sulfonamide. A crystal suitable for X-ray crystallography was grown by vapor diffusion with dichloromethane and pentane.

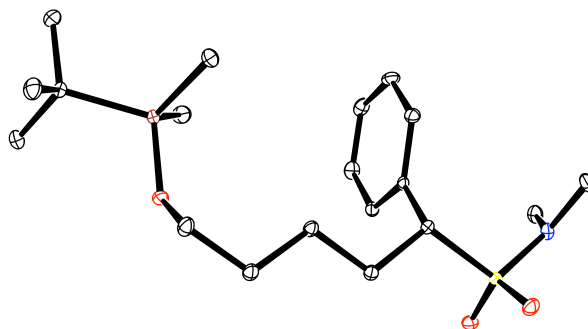

A suitable crystal of C<sub>19</sub>H<sub>35</sub>NO<sub>3</sub>Si was selected for analysis. All measurements were made on a Bruker SMART 1000 CCD with filtered Mo-K $\alpha$  radiation at a temperature of 100 K. Using Olex2,<sup>6</sup> the structure was solved with the ShelXS<sup>7</sup> structure solution program using Direct Methods and refined with the ShelXL<sup>7</sup> refinement package using Least Squares minimization. The absolute stereochemistry was determined on the basis of the absolute structure parameter.

- 
- (6) Dolomanov, O. V.; Bourhis, L. J.; Gildea, R. J.; Howard, J. A. K.; Puschmann, H. J. *Appl. Crystallogr.* **2009**, *42*, 339–341.  
(7) Sheldrick, G. M. *Acta Cryst.* **2008**, *A64*, 112–122.

Table S-1. Crystal data and structure refinement for crystal01.

|                                   |                                             |                               |
|-----------------------------------|---------------------------------------------|-------------------------------|
| Identification code               | crystal01                                   |                               |
| Empirical formula                 | $C_{19}H_{35}INO_3SSi$                      |                               |
| Formula weight                    | 385.63                                      |                               |
| Temperature                       | 100 K                                       |                               |
| Wavelength                        | 0.71073 Å                                   |                               |
| Crystal system                    | Monoclinic                                  |                               |
| Space group                       | $P2_1$                                      |                               |
| Unit cell dimensions              | $a = 5.9209(6)$ Å                           | $\alpha = 90^\circ$ .         |
|                                   | $b = 10.6607(12)$ Å                         | $\beta = 99.2230(10)^\circ$ . |
|                                   | $c = 17.0647(19)$ Å                         | $\gamma = 90^\circ$ .         |
| Volume                            | $1063.2(2)$ Å <sup>3</sup>                  |                               |
| Z                                 | 2                                           |                               |
| Density (calculated)              | 1.205 Mg/m <sup>3</sup>                     |                               |
| Absorption coefficient            | 0.226 mm <sup>-1</sup>                      |                               |
| F(000)                            | 420                                         |                               |
| Crystal size                      | 0.4 x 0.4 x 0.1 mm <sup>3</sup>             |                               |
| Theta range for data collection   | 1.209 to 29.107°.                           |                               |
| Index ranges                      | -7 ≤ h ≤ 8, -13 ≤ k ≤ 14, -22 ≤ l ≤ 23      |                               |
| Reflections collected             | 16770                                       |                               |
| Independent reflections           | 5160 [R(int) = 0.0236]                      |                               |
| Completeness to theta = 25.000°   | 100.0 %                                     |                               |
| Absorption correction             | Semi-empirical from equivalents             |                               |
| Max. and min. transmission        | 1.0000 and 0.9257                           |                               |
| Refinement method                 | Full-matrix least-squares on F <sup>2</sup> |                               |
| Data / restraints / parameters    | 5160 / 1 / 233                              |                               |
| Goodness-of-fit on F <sup>2</sup> | 1.098                                       |                               |
| Final R indices [I > 2σ(I)]       | R1 = 0.0279, wR2 = 0.0669                   |                               |
| R indices (all data)              | R1 = 0.0308, wR2 = 0.0690                   |                               |
| Absolute structure parameter      | 0.02(2)                                     |                               |
| Largest diff. peak and hole       | 0.325 and -0.163 e/Å <sup>-3</sup>          |                               |

Table S-2. Atomic coordinates ( $\times 10^4$ ) and equivalent isotropic displacement parameters ( $\text{\AA}^2 \times 10^3$ )

for crystal01.  $U(\text{eq})$  is defined as one third of the trace of the orthogonalized  $U^{ij}$  tensor.

|       | x        | y        | z       | $U(\text{eq})$ |
|-------|----------|----------|---------|----------------|
| S(1)  | -4031(1) | 5489(1)  | 517(1)  | 14(1)          |
| Si(1) | 2618(1)  | 1014(1)  | 3465(1) | 14(1)          |
| O(1)  | -3746(3) | 5244(1)  | -291(1) | 20(1)          |
| O(2)  | -6212(2) | 5232(1)  | 755(1)  | 19(1)          |
| O(3)  | 648(2)   | 432(2)   | 2769(1) | 19(1)          |
| N(1)  | -3503(3) | 6967(2)  | 689(1)  | 16(1)          |
| C(1)  | -4272(4) | 7610(2)  | 1361(1) | 20(1)          |
| C(2)  | -1459(4) | 7506(2)  | 435(1)  | 22(1)          |
| C(3)  | -1857(3) | 4582(2)  | 1132(1) | 12(1)          |
| C(4)  | -2416(3) | 3172(2)  | 1032(1) | 15(1)          |
| C(5)  | -552(3)  | 2381(2)  | 1521(1) | 16(1)          |
| C(6)  | -952(4)  | 967(2)   | 1416(1) | 18(1)          |
| C(7)  | 820(4)   | 204(2)   | 1957(1) | 21(1)          |
| C(8)  | -1531(3) | 5030(2)  | 1983(1) | 12(1)          |
| C(9)  | 508(3)   | 5621(2)  | 2311(1) | 17(1)          |
| C(10) | 842(3)   | 6027(2)  | 3095(1) | 21(1)          |
| C(11) | -835(4)  | 5849(2)  | 3558(1) | 21(1)          |
| C(12) | -2858(4) | 5251(2)  | 3243(1) | 20(1)          |
| C(13) | -3211(3) | 4849(2)  | 2456(1) | 16(1)          |
| C(14) | 1116(4)  | 2120(2)  | 4054(1) | 24(1)          |
| C(15) | 4837(4)  | 1893(2)  | 3029(1) | 27(1)          |
| C(16) | 3960(3)  | -312(2)  | 4110(1) | 15(1)          |
| C(17) | 5647(4)  | 216(2)   | 4811(1) | 23(1)          |
| C(18) | 2103(4)  | -1074(2) | 4431(1) | 22(1)          |
| C(19) | 5248(4)  | -1178(2) | 3614(1) | 24(1)          |

Table S-3. Bond lengths [ $\text{\AA}$ ] and angles [ $^\circ$ ] for crystal01.

---

|                  |            |
|------------------|------------|
| S(1)-O(1)        | 1.4394(15) |
| S(1)-O(2)        | 1.4405(15) |
| S(1)-N(1)        | 1.6247(18) |
| S(1)-C(3)        | 1.8048(19) |
| Si(1)-O(3)       | 1.6471(14) |
| Si(1)-C(14)      | 1.865(2)   |
| Si(1)-C(15)      | 1.863(2)   |
| Si(1)-C(16)      | 1.886(2)   |
| O(3)-C(7)        | 1.426(2)   |
| N(1)-C(1)        | 1.469(3)   |
| N(1)-C(2)        | 1.466(3)   |
| C(3)-C(4)        | 1.543(3)   |
| C(3)-C(8)        | 1.512(3)   |
| C(4)-C(5)        | 1.526(3)   |
| C(5)-C(6)        | 1.532(3)   |
| C(6)-C(7)        | 1.517(3)   |
| C(8)-C(9)        | 1.396(3)   |
| C(8)-C(13)       | 1.391(3)   |
| C(9)-C(10)       | 1.390(3)   |
| C(10)-C(11)      | 1.378(3)   |
| C(11)-C(12)      | 1.387(3)   |
| C(12)-C(13)      | 1.393(3)   |
| C(16)-C(17)      | 1.537(3)   |
| C(16)-C(18)      | 1.537(3)   |
| C(16)-C(19)      | 1.535(3)   |
| O(1)-S(1)-O(2)   | 118.93(9)  |
| O(1)-S(1)-N(1)   | 107.45(9)  |
| O(1)-S(1)-C(3)   | 106.10(9)  |
| O(2)-S(1)-N(1)   | 106.79(9)  |
| O(2)-S(1)-C(3)   | 108.81(9)  |
| N(1)-S(1)-C(3)   | 108.40(9)  |
| O(3)-Si(1)-C(14) | 106.44(9)  |
| O(3)-Si(1)-C(15) | 111.35(9)  |
| O(3)-Si(1)-C(16) | 108.79(9)  |

|                   |            |
|-------------------|------------|
| C(14)-Si(1)-C(16) | 110.66(10) |
| C(15)-Si(1)-C(14) | 108.96(11) |
| C(15)-Si(1)-C(16) | 110.57(10) |
| C(7)-O(3)-Si(1)   | 127.79(13) |
| C(1)-N(1)-S(1)    | 121.23(14) |
| C(2)-N(1)-S(1)    | 118.06(14) |
| C(2)-N(1)-C(1)    | 114.98(17) |
| C(4)-C(3)-S(1)    | 109.70(13) |
| C(8)-C(3)-S(1)    | 111.03(13) |
| C(8)-C(3)-C(4)    | 113.95(16) |
| C(5)-C(4)-C(3)    | 110.75(15) |
| C(4)-C(5)-C(6)    | 113.27(16) |
| C(7)-C(6)-C(5)    | 112.19(16) |
| O(3)-C(7)-C(6)    | 110.46(17) |
| C(9)-C(8)-C(3)    | 119.76(17) |
| C(13)-C(8)-C(3)   | 121.38(17) |
| C(13)-C(8)-C(9)   | 118.86(18) |
| C(10)-C(9)-C(8)   | 120.46(18) |
| C(11)-C(10)-C(9)  | 120.29(19) |
| C(10)-C(11)-C(12) | 119.91(19) |
| C(11)-C(12)-C(13) | 120.06(19) |
| C(8)-C(13)-C(12)  | 120.41(19) |
| C(17)-C(16)-Si(1) | 109.87(14) |
| C(17)-C(16)-C(18) | 109.15(17) |
| C(18)-C(16)-Si(1) | 110.21(14) |
| C(19)-C(16)-Si(1) | 109.22(14) |
| C(19)-C(16)-C(17) | 109.34(17) |
| C(19)-C(16)-C(18) | 109.03(17) |

---

Table S-4. Anisotropic displacement parameters ( $\text{\AA}^2 \times 10^3$ ) for crystal01. The anisotropic displacement factor exponent takes the form:  $-2\pi^2 [ h^2 a^{*2} U^{11} + \dots + 2 h k a^* b^* U^{12} ]$

|       | U11   | U22   | U33   | U23   | U13   | U12   |
|-------|-------|-------|-------|-------|-------|-------|
| S(1)  | 14(1) | 14(1) | 12(1) | 1(1)  | -1(1) | 0(1)  |
| Si(1) | 14(1) | 12(1) | 15(1) | 2(1)  | 1(1)  | -1(1) |
| O(1)  | 26(1) | 21(1) | 13(1) | 0(1)  | -2(1) | 0(1)  |
| O(2)  | 14(1) | 19(1) | 23(1) | 1(1)  | -1(1) | -1(1) |
| O(3)  | 21(1) | 20(1) | 14(1) | 2(1)  | -2(1) | -6(1) |
| N(1)  | 20(1) | 13(1) | 16(1) | 2(1)  | 4(1)  | 1(1)  |
| C(1)  | 24(1) | 14(1) | 22(1) | 0(1)  | 5(1)  | 3(1)  |
| C(2)  | 27(1) | 17(1) | 24(1) | 2(1)  | 8(1)  | -6(1) |
| C(3)  | 12(1) | 13(1) | 11(1) | 1(1)  | 1(1)  | 2(1)  |
| C(4)  | 18(1) | 13(1) | 12(1) | -2(1) | 1(1)  | 0(1)  |
| C(5)  | 19(1) | 14(1) | 13(1) | -1(1) | -1(1) | 2(1)  |
| C(6)  | 24(1) | 15(1) | 14(1) | -1(1) | -2(1) | 0(1)  |
| C(7)  | 27(1) | 15(1) | 18(1) | -1(1) | -1(1) | 4(1)  |
| C(8)  | 15(1) | 10(1) | 12(1) | 1(1)  | 1(1)  | 1(1)  |
| C(9)  | 14(1) | 20(1) | 18(1) | 1(1)  | 3(1)  | 0(1)  |
| C(10) | 18(1) | 20(1) | 22(1) | -5(1) | -5(1) | -1(1) |
| C(11) | 30(1) | 19(1) | 14(1) | -3(1) | 0(1)  | 5(1)  |
| C(12) | 24(1) | 21(1) | 16(1) | 0(1)  | 8(1)  | 2(1)  |
| C(13) | 18(1) | 14(1) | 15(1) | 1(1)  | 2(1)  | 0(1)  |
| C(14) | 23(1) | 20(1) | 29(1) | -5(1) | 0(1)  | 4(1)  |
| C(15) | 23(1) | 28(1) | 29(1) | 12(1) | 2(1)  | -8(1) |
| C(16) | 16(1) | 14(1) | 15(1) | 2(1)  | 1(1)  | 1(1)  |
| C(17) | 23(1) | 25(1) | 20(1) | 5(1)  | -4(1) | -2(1) |
| C(18) | 24(1) | 17(1) | 24(1) | 5(1)  | 4(1)  | -2(1) |
| C(19) | 24(1) | 21(1) | 29(1) | 1(1)  | 5(1)  | 6(1)  |



Table S-5. Hydrogen coordinates ( $\times 10^4$ ) and isotropic displacement parameters ( $\text{\AA}^2 \times 10^3$ ) for crystal01.

|        | x     | y     | z    | U(eq) |
|--------|-------|-------|------|-------|
| H(1A)  | -5587 | 7185  | 1497 | 30    |
| H(1B)  | -4669 | 8461  | 1216 | 30    |
| H(1C)  | -3064 | 7603  | 1809 | 30    |
| H(2A)  | -208  | 7483  | 869  | 33    |
| H(2B)  | -1761 | 8359  | 270  | 33    |
| H(2C)  | -1070 | 7027  | -1   | 33    |
| H(3)   | -413  | 4726  | 934  | 15    |
| H(4A)  | -3873 | 3002  | 1201 | 18    |
| H(4B)  | -2546 | 2944  | 476  | 18    |
| H(5A)  | -473  | 2592  | 2077 | 19    |
| H(5B)  | 911   | 2591  | 1368 | 19    |
| H(6A)  | -2463 | 763   | 1529 | 22    |
| H(6B)  | -902  | 741   | 869  | 22    |
| H(7A)  | 586   | -681  | 1840 | 25    |
| H(7B)  | 2340  | 428   | 1861 | 25    |
| H(9)   | 1649  | 5743  | 2003 | 20    |
| H(10)  | 2205  | 6421  | 3308 | 25    |
| H(11)  | -611  | 6130  | 4081 | 26    |
| H(12)  | -3980 | 5118  | 3558 | 24    |
| H(13)  | -4578 | 4458  | 2246 | 19    |
| H(14A) | 483   | 2801  | 3721 | 36    |
| H(14B) | 2183  | 2444  | 4490 | 36    |
| H(14C) | -93   | 1686  | 4254 | 36    |
| H(15A) | 5788  | 1311  | 2802 | 40    |
| H(15B) | 5761  | 2371  | 3437 | 40    |
| H(15C) | 4107  | 2449  | 2624 | 40    |
| H(17A) | 6824  | 681   | 4613 | 35    |
| H(17B) | 6325  | -463  | 5136 | 35    |
| H(17C) | 4846  | 759   | 5121 | 35    |
| H(18A) | 1374  | -556  | 4777 | 32    |
| H(18B) | 2791  | -1786 | 4721 | 32    |

|        |      |       |      |    |
|--------|------|-------|------|----|
| H(18C) | 986  | -1356 | 3996 | 32 |
| H(19A) | 4214 | -1474 | 3160 | 37 |
| H(19B) | 5860 | -1880 | 3931 | 37 |
| H(19C) | 6475 | -722  | 3439 | 37 |

---

**Product from entry 2 of Table 3: (S)-(Cyclohexyl(methylsulfonyl)methyl)benzene (from a reaction using (R,R)-L1).** A crystal suitable for X-ray crystallography was grown by vapor diffusion with dichloromethane and pentane.

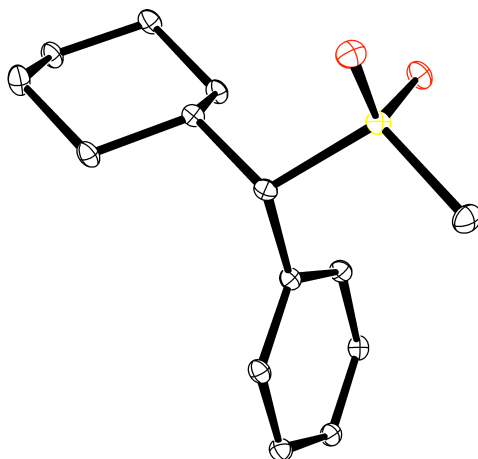

A suitable crystal of  $C_{14}H_{20}O_2S$  was selected for analysis. All measurements were made on a Bruker APEX-II CCD with filtered Mo- $K\alpha$  radiation at a temperature of 100 K. Using Olex2,<sup>6</sup> the structure was solved with the ShelXS<sup>7</sup> structure solution program using Direct Methods and refined with the ShelXL<sup>7</sup> refinement package using Least Squares minimization. The absolute stereochemistry was determined on the basis of the absolute structure parameter.

Table S-6. Crystal data and structure refinement for crystal03.

|                                   |                                               |                       |
|-----------------------------------|-----------------------------------------------|-----------------------|
| Identification code               | crystal03                                     |                       |
| Empirical formula                 | $C_{14}H_{20}O_2S$                            |                       |
| Formula weight                    | 252.36                                        |                       |
| Temperature                       | 100.15 K                                      |                       |
| Wavelength                        | 0.71073 Å                                     |                       |
| Crystal system                    | Orthorhombic                                  |                       |
| Space group                       | P2 <sub>1</sub> 2 <sub>1</sub> 2 <sub>1</sub> |                       |
| Unit cell dimensions              | a = 6.2283(3) Å                               | $\alpha = 90^\circ$ . |
|                                   | b = 13.7866(7) Å                              | $\beta = 90^\circ$ .  |
|                                   | c = 15.3937(8) Å                              | $\gamma = 90^\circ$ . |
| Volume                            | 1321.81(12) Å <sup>3</sup>                    |                       |
| Z                                 | 4                                             |                       |
| Density (calculated)              | 1.268 Mg/m <sup>3</sup>                       |                       |
| Absorption coefficient            | 0.233 mm <sup>-1</sup>                        |                       |
| F(000)                            | 544                                           |                       |
| Crystal size                      | 0.62 x 0.16 x 0.09 mm <sup>3</sup>            |                       |
| Theta range for data collection   | 1.983 to 33.731°.                             |                       |
| Index ranges                      | -9 ≤ h ≤ 9, -21 ≤ k ≤ 20, -23 ≤ l ≤ 23        |                       |
| Reflections collected             | 39471                                         |                       |
| Independent reflections           | 4910 [R(int) = 0.0621]                        |                       |
| Completeness to theta = 25.000°   | 100.0 %                                       |                       |
| Absorption correction             | Semi-empirical from equivalents               |                       |
| Max. and min. transmission        | 1.0000 and 0.8575                             |                       |
| Refinement method                 | Full-matrix least-squares on F <sup>2</sup>   |                       |
| Data / restraints / parameters    | 4910 / 0 / 155                                |                       |
| Goodness-of-fit on F <sup>2</sup> | 1.141                                         |                       |
| Final R indices [I > 2σ(I)]       | R1 = 0.0540, wR2 = 0.1115                     |                       |
| R indices (all data)              | R1 = 0.0741, wR2 = 0.1179                     |                       |
| Absolute structure parameter      | 0.01(3)                                       |                       |
| Largest diff. peak and hole       | 0.692 and -0.385 e/Å <sup>-3</sup>            |                       |

Table S-7. Atomic coordinates ( $\times 10^4$ ) and equivalent isotropic displacement parameters ( $\text{\AA}^2 \times 10^3$ ) for crystal03.  $U(\text{eq})$  is defined as one third of the trace of the orthogonalized  $U^{ij}$  tensor.

|       | x       | y       | z       | U(eq) |
|-------|---------|---------|---------|-------|
| S(1)  | 7502(1) | 3757(1) | 4892(1) | 17(1) |
| O(1)  | 6971(3) | 3206(1) | 5662(1) | 21(1) |
| O(2)  | 9662(3) | 4136(1) | 4836(1) | 21(1) |
| C(1)  | 5566(4) | 4731(2) | 4817(2) | 14(1) |
| C(2)  | 5963(4) | 5465(2) | 5570(2) | 14(1) |
| C(3)  | 7759(4) | 6208(2) | 5418(2) | 17(1) |
| C(4)  | 8064(4) | 6849(2) | 6224(2) | 20(1) |
| C(5)  | 5993(4) | 7371(2) | 6464(2) | 21(1) |
| C(6)  | 4161(4) | 6651(2) | 6587(2) | 23(1) |
| C(7)  | 3868(4) | 5994(2) | 5790(2) | 19(1) |
| C(8)  | 5392(4) | 5139(2) | 3904(2) | 15(1) |
| C(9)  | 7131(4) | 5552(2) | 3461(2) | 17(1) |
| C(10) | 6869(4) | 5905(2) | 2620(2) | 18(1) |
| C(11) | 4895(4) | 5840(2) | 2207(2) | 18(1) |
| C(12) | 3168(4) | 5434(2) | 2644(2) | 19(1) |
| C(13) | 3419(4) | 5081(2) | 3483(2) | 17(1) |
| C(14) | 7027(5) | 3018(2) | 3977(2) | 23(1) |

Table S-8. Bond lengths [ $\text{\AA}$ ] and angles [ $^\circ$ ] for crystal03.

---

|             |            |
|-------------|------------|
| S(1)-O(1)   | 1.4458(19) |
| S(1)-O(2)   | 1.4461(19) |
| S(1)-C(1)   | 1.809(2)   |
| S(1)-C(14)  | 1.763(3)   |
| C(1)-H(1)   | 1.0000     |
| C(1)-C(2)   | 1.557(3)   |
| C(1)-C(8)   | 1.518(3)   |
| C(2)-H(2)   | 1.0000     |
| C(2)-C(3)   | 1.535(3)   |
| C(2)-C(7)   | 1.533(3)   |
| C(3)-H(3A)  | 0.9900     |
| C(3)-H(3B)  | 0.9900     |
| C(3)-C(4)   | 1.536(3)   |
| C(4)-H(4A)  | 0.9900     |
| C(4)-H(4B)  | 0.9900     |
| C(4)-C(5)   | 1.523(4)   |
| C(5)-H(5A)  | 0.9900     |
| C(5)-H(5B)  | 0.9900     |
| C(5)-C(6)   | 1.524(4)   |
| C(6)-H(6A)  | 0.9900     |
| C(6)-H(6B)  | 0.9900     |
| C(6)-C(7)   | 1.536(4)   |
| C(7)-H(7A)  | 0.9900     |
| C(7)-H(7B)  | 0.9900     |
| C(8)-C(9)   | 1.401(3)   |
| C(8)-C(13)  | 1.391(4)   |
| C(9)-H(9)   | 0.9500     |
| C(9)-C(10)  | 1.393(3)   |
| C(10)-H(10) | 0.9500     |
| C(10)-C(11) | 1.387(4)   |
| C(11)-H(11) | 0.9500     |
| C(11)-C(12) | 1.386(4)   |
| C(12)-H(12) | 0.9500     |
| C(12)-C(13) | 1.390(4)   |
| C(13)-H(13) | 0.9500     |

|                  |            |
|------------------|------------|
| C(14)-H(14A)     | 0.9800     |
| C(14)-H(14B)     | 0.9800     |
| C(14)-H(14C)     | 0.9800     |
| O(1)-S(1)-O(2)   | 116.89(12) |
| O(1)-S(1)-C(1)   | 106.82(11) |
| O(1)-S(1)-C(14)  | 108.23(11) |
| O(2)-S(1)-C(1)   | 110.34(10) |
| O(2)-S(1)-C(14)  | 108.51(13) |
| C(14)-S(1)-C(1)  | 105.43(13) |
| S(1)-C(1)-H(1)   | 105.6      |
| C(2)-C(1)-S(1)   | 109.22(16) |
| C(2)-C(1)-H(1)   | 105.6      |
| C(8)-C(1)-S(1)   | 112.41(17) |
| C(8)-C(1)-H(1)   | 105.6      |
| C(8)-C(1)-C(2)   | 117.36(18) |
| C(1)-C(2)-H(2)   | 107.1      |
| C(3)-C(2)-C(1)   | 115.9(2)   |
| C(3)-C(2)-H(2)   | 107.1      |
| C(7)-C(2)-C(1)   | 109.8(2)   |
| C(7)-C(2)-H(2)   | 107.1      |
| C(7)-C(2)-C(3)   | 109.60(18) |
| C(2)-C(3)-H(3A)  | 109.5      |
| C(2)-C(3)-H(3B)  | 109.5      |
| C(2)-C(3)-C(4)   | 110.6(2)   |
| H(3A)-C(3)-H(3B) | 108.1      |
| C(4)-C(3)-H(3A)  | 109.5      |
| C(4)-C(3)-H(3B)  | 109.5      |
| C(3)-C(4)-H(4A)  | 109.4      |
| C(3)-C(4)-H(4B)  | 109.4      |
| H(4A)-C(4)-H(4B) | 108.0      |
| C(5)-C(4)-C(3)   | 111.3(2)   |
| C(5)-C(4)-H(4A)  | 109.4      |
| C(5)-C(4)-H(4B)  | 109.4      |
| C(4)-C(5)-H(5A)  | 109.5      |
| C(4)-C(5)-H(5B)  | 109.5      |
| C(4)-C(5)-C(6)   | 110.9(2)   |

|                     |          |
|---------------------|----------|
| H(5A)-C(5)-H(5B)    | 108.1    |
| C(6)-C(5)-H(5A)     | 109.5    |
| C(6)-C(5)-H(5B)     | 109.5    |
| C(5)-C(6)-H(6A)     | 109.2    |
| C(5)-C(6)-H(6B)     | 109.2    |
| C(5)-C(6)-C(7)      | 111.9(2) |
| H(6A)-C(6)-H(6B)    | 107.9    |
| C(7)-C(6)-H(6A)     | 109.2    |
| C(7)-C(6)-H(6B)     | 109.2    |
| C(2)-C(7)-C(6)      | 110.9(2) |
| C(2)-C(7)-H(7A)     | 109.5    |
| C(2)-C(7)-H(7B)     | 109.5    |
| C(6)-C(7)-H(7A)     | 109.5    |
| C(6)-C(7)-H(7B)     | 109.5    |
| H(7A)-C(7)-H(7B)    | 108.1    |
| C(9)-C(8)-C(1)      | 123.1(2) |
| C(13)-C(8)-C(1)     | 118.2(2) |
| C(13)-C(8)-C(9)     | 118.7(2) |
| C(8)-C(9)-H(9)      | 119.9    |
| C(10)-C(9)-C(8)     | 120.2(2) |
| C(10)-C(9)-H(9)     | 119.9    |
| C(9)-C(10)-H(10)    | 119.7    |
| C(11)-C(10)-C(9)    | 120.5(2) |
| C(11)-C(10)-H(10)   | 119.7    |
| C(10)-C(11)-H(11)   | 120.3    |
| C(12)-C(11)-C(10)   | 119.4(2) |
| C(12)-C(11)-H(11)   | 120.3    |
| C(11)-C(12)-H(12)   | 119.8    |
| C(11)-C(12)-C(13)   | 120.4(2) |
| C(13)-C(12)-H(12)   | 119.8    |
| C(8)-C(13)-H(13)    | 119.6    |
| C(12)-C(13)-C(8)    | 120.8(2) |
| C(12)-C(13)-H(13)   | 119.6    |
| S(1)-C(14)-H(14A)   | 109.5    |
| S(1)-C(14)-H(14B)   | 109.5    |
| S(1)-C(14)-H(14C)   | 109.5    |
| H(14A)-C(14)-H(14B) | 109.5    |



H(14A)-C(14)-H(14C) 109.5

H(14B)-C(14)-H(14C) 109.5

---

Table S-9. Anisotropic displacement parameters ( $\text{\AA}^2 \times 10^3$ ) for crystal03. The anisotropic displacement factor exponent takes the form:  $-2\pi^2 [ h^2 a^{*2} U^{11} + \dots + 2 h k a^* b^* U^{12} ]$

|       | U11   | U22   | U33   | U23   | U13   | U12   |
|-------|-------|-------|-------|-------|-------|-------|
| S(1)  | 19(1) | 13(1) | 18(1) | 1(1)  | -1(1) | -1(1) |
| O(1)  | 26(1) | 17(1) | 20(1) | 2(1)  | -1(1) | -2(1) |
| O(2)  | 17(1) | 16(1) | 29(1) | 2(1)  | 0(1)  | 0(1)  |
| C(1)  | 11(1) | 15(1) | 17(1) | 1(1)  | -1(1) | -3(1) |
| C(2)  | 14(1) | 11(1) | 18(1) | 2(1)  | -1(1) | -2(1) |
| C(3)  | 11(1) | 17(1) | 24(1) | -2(1) | 0(1)  | -3(1) |
| C(4)  | 15(1) | 16(1) | 28(1) | -2(1) | -3(1) | -2(1) |
| C(5)  | 18(1) | 15(1) | 29(1) | -4(1) | -1(1) | 2(1)  |
| C(6)  | 17(1) | 22(1) | 31(2) | -6(1) | 4(1)  | 0(1)  |
| C(7)  | 12(1) | 18(1) | 26(1) | -2(1) | 0(1)  | 0(1)  |
| C(8)  | 15(1) | 12(1) | 18(1) | 1(1)  | 0(1)  | 0(1)  |
| C(9)  | 14(1) | 17(1) | 20(1) | 0(1)  | -1(1) | -3(1) |
| C(10) | 19(1) | 14(1) | 20(1) | 1(1)  | 4(1)  | -1(1) |
| C(11) | 22(1) | 14(1) | 18(1) | 0(1)  | -1(1) | 3(1)  |
| C(12) | 18(1) | 18(1) | 21(1) | -2(1) | -3(1) | 2(1)  |
| C(13) | 12(1) | 17(1) | 21(1) | 0(1)  | 1(1)  | -2(1) |
| C(14) | 32(2) | 14(1) | 22(1) | -3(1) | -2(1) | -1(1) |

Table S-10. Hydrogen coordinates ( $\times 10^4$ ) and isotropic displacement parameters ( $\text{\AA}^2 \times 10^3$ ) for crystal03.

|        | x    | y    | z    | U(eq) |
|--------|------|------|------|-------|
| H(1)   | 4140 | 4428 | 4942 | 17    |
| H(2)   | 6373 | 5077 | 6093 | 17    |
| H(3A)  | 7392 | 6620 | 4912 | 21    |
| H(3B)  | 9117 | 5865 | 5286 | 21    |
| H(4A)  | 8533 | 6442 | 6719 | 23    |
| H(4B)  | 9203 | 7333 | 6109 | 23    |
| H(5A)  | 5613 | 7837 | 6000 | 25    |
| H(5B)  | 6210 | 7741 | 7009 | 25    |
| H(6A)  | 2812 | 7011 | 6695 | 28    |
| H(6B)  | 4457 | 6244 | 7103 | 28    |
| H(7A)  | 2725 | 5513 | 5908 | 22    |
| H(7B)  | 3415 | 6392 | 5286 | 22    |
| H(9)   | 8494 | 5592 | 3736 | 20    |
| H(10)  | 8051 | 6192 | 2327 | 21    |
| H(11)  | 4728 | 6071 | 1629 | 22    |
| H(12)  | 1806 | 5398 | 2368 | 23    |
| H(13)  | 2229 | 4797 | 3773 | 20    |
| H(14A) | 7233 | 3400 | 3447 | 34    |
| H(14B) | 5551 | 2773 | 3996 | 34    |
| H(14C) | 8032 | 2471 | 3980 | 34    |

**Product from entry 5 of Table 5 (run with (3*R*,8*S*)-L6). (*S,E*)-4-((1-Phenylhept-1-en-3-yl)sulfonyl)morpholine.** A crystal suitable for X-ray crystallography was grown by vapor diffusion with Et<sub>2</sub>O and pentane.

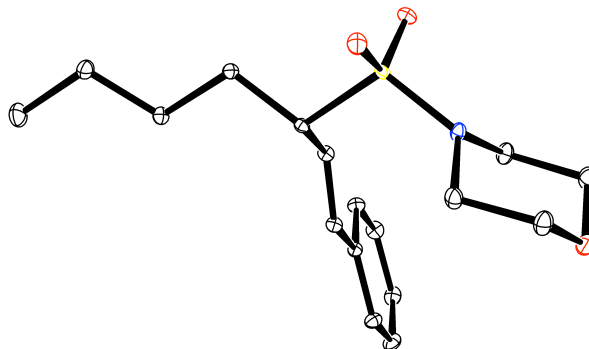

A suitable crystal of C<sub>17</sub>H<sub>25</sub>NO<sub>3</sub>S was selected for analysis. All measurements were made on a Bruker APEX-II CCD with filtered Mo-K $\alpha$  radiation at a temperature of 100 K. Using Olex2,<sup>6</sup> the structure was solved with the ShelXS<sup>7</sup> structure solution program using Direct Methods and refined with the ShelXL<sup>7</sup> refinement package using Least Squares minimization. The absolute stereochemistry was determined on the basis of the absolute structure parameter.

Table S-11. Crystal data and structure refinement for crystal02.

|                                   |                                             |                              |
|-----------------------------------|---------------------------------------------|------------------------------|
| Identification code               | crystal02                                   |                              |
| Empirical formula                 | $C_{17}H_{25}I\text{NO}_3S$                 |                              |
| Formula weight                    | 323.44                                      |                              |
| Temperature                       | 100 K                                       |                              |
| Wavelength                        | 0.71073 Å                                   |                              |
| Crystal system                    | Monoclinic                                  |                              |
| Space group                       | $P2_1$                                      |                              |
| Unit cell dimensions              | $a = 12.8350(6)$ Å                          | $\alpha = 90^\circ$ .        |
|                                   | $b = 5.6272(3)$ Å                           | $\beta = 113.133(2)^\circ$ . |
|                                   | $c = 12.9187(6)$ Å                          | $\gamma = 90^\circ$ .        |
| Volume                            | $858.03(7)$ Å <sup>3</sup>                  |                              |
| Z                                 | 2                                           |                              |
| Density (calculated)              | 1.252 Mg/m <sup>3</sup>                     |                              |
| Absorption coefficient            | 0.201 mm <sup>-1</sup>                      |                              |
| F(000)                            | 348                                         |                              |
| Crystal size                      | 0.5 x 0.12 x 0.12 mm <sup>3</sup>           |                              |
| Theta range for data collection   | 1.714 to 31.552°.                           |                              |
| Index ranges                      | -18 ≤ h ≤ 18, -8 ≤ k ≤ 8, -19 ≤ l ≤ 19      |                              |
| Reflections collected             | 57330                                       |                              |
| Independent reflections           | 5731 [R(int) = 0.0344]                      |                              |
| Completeness to theta = 25.242°   | 100.0 %                                     |                              |
| Absorption correction             | Semi-empirical from equivalents             |                              |
| Max. and min. transmission        | 1.0000 and 0.8839                           |                              |
| Refinement method                 | Full-matrix least-squares on F <sup>2</sup> |                              |
| Data / restraints / parameters    | 5731 / 1 / 200                              |                              |
| Goodness-of-fit on F <sup>2</sup> | 1.073                                       |                              |
| Final R indices [I > 2σ(I)]       | R1 = 0.0258, wR2 = 0.0683                   |                              |
| R indices (all data)              | R1 = 0.0273, wR2 = 0.0695                   |                              |
| Absolute structure parameter      | 0.019(11)                                   |                              |
| Largest diff. peak and hole       | 0.444 and -0.190 e/Å <sup>-3</sup>          |                              |

Table S-12. Atomic coordinates ( $\times 10^4$ ) and equivalent isotropic displacement parameters ( $\text{\AA}^2 \times 10^3$ ) for crystal02.  $U(\text{eq})$  is defined as one third of the trace of the orthogonalized  $U^{ij}$  tensor.

|       | x       | y        | z        | U(eq) |
|-------|---------|----------|----------|-------|
| S(1)  | 4726(1) | 7787(1)  | 3347(1)  | 12(1) |
| O(1)  | 4294(1) | 10123(2) | 2942(1)  | 19(1) |
| O(2)  | 5535(1) | 7480(2)  | 4482(1)  | 18(1) |
| O(3)  | 6358(1) | 4985(2)  | 1135(1)  | 21(1) |
| N(1)  | 5344(1) | 6838(2)  | 2534(1)  | 14(1) |
| C(1)  | 3537(1) | 5903(2)  | 3176(1)  | 11(1) |
| C(2)  | 3067(1) | 6643(2)  | 4055(1)  | 13(1) |
| C(3)  | 2154(1) | 4910(2)  | 4061(1)  | 14(1) |
| C(4)  | 1833(1) | 5268(3)  | 5067(1)  | 18(1) |
| C(5)  | 944(1)  | 3484(3)  | 5081(1)  | 25(1) |
| C(6)  | 2671(1) | 6069(2)  | 1991(1)  | 13(1) |
| C(7)  | 2415(1) | 4264(2)  | 1261(1)  | 13(1) |
| C(8)  | 1574(1) | 4329(2)  | 93(1)    | 12(1) |
| C(9)  | 797(1)  | 6196(2)  | -325(1)  | 16(1) |
| C(10) | 21(1)   | 6194(3)  | -1441(1) | 19(1) |
| C(11) | 9(1)    | 4336(3)  | -2156(1) | 20(1) |
| C(12) | 764(1)  | 2453(3)  | -1748(1) | 20(1) |
| C(13) | 1539(1) | 2453(2)  | -630(1)  | 16(1) |
| C(14) | 4862(1) | 7376(2)  | 1320(1)  | 18(1) |
| C(15) | 5820(1) | 7255(3)  | 909(1)   | 21(1) |
| C(16) | 6847(1) | 4566(3)  | 2317(1)  | 21(1) |
| C(17) | 5947(1) | 4555(3)  | 2806(1)  | 19(1) |

Table S-13. Bond lengths [ $\text{\AA}$ ] and angles [ $^\circ$ ] for crystal02.

---

|                  |            |
|------------------|------------|
| S(1)-O(1)        | 1.4424(10) |
| S(1)-O(2)        | 1.4360(9)  |
| S(1)-N(1)        | 1.6356(11) |
| S(1)-C(1)        | 1.7985(12) |
| O(3)-C(15)       | 1.4267(18) |
| O(3)-C(16)       | 1.4241(17) |
| N(1)-C(14)       | 1.4733(16) |
| N(1)-C(17)       | 1.4694(17) |
| C(1)-C(2)        | 1.5379(17) |
| C(1)-C(6)        | 1.5001(15) |
| C(2)-C(3)        | 1.5265(17) |
| C(3)-C(4)        | 1.5241(18) |
| C(4)-C(5)        | 1.525(2)   |
| C(6)-C(7)        | 1.3364(17) |
| C(7)-C(8)        | 1.4711(16) |
| C(8)-C(9)        | 1.4021(17) |
| C(8)-C(13)       | 1.3993(17) |
| C(9)-C(10)       | 1.3937(16) |
| C(10)-C(11)      | 1.391(2)   |
| C(11)-C(12)      | 1.393(2)   |
| C(12)-C(13)      | 1.3954(17) |
| C(14)-C(15)      | 1.5194(19) |
| C(16)-C(17)      | 1.5189(19) |
| O(1)-S(1)-N(1)   | 106.16(6)  |
| O(1)-S(1)-C(1)   | 107.85(6)  |
| O(2)-S(1)-O(1)   | 120.05(6)  |
| O(2)-S(1)-N(1)   | 106.10(6)  |
| O(2)-S(1)-C(1)   | 107.05(6)  |
| N(1)-S(1)-C(1)   | 109.34(6)  |
| C(16)-O(3)-C(15) | 109.98(11) |
| C(14)-N(1)-S(1)  | 120.64(9)  |
| C(17)-N(1)-S(1)  | 118.32(9)  |
| C(17)-N(1)-C(14) | 113.32(11) |
| C(2)-C(1)-S(1)   | 108.03(8)  |

|                   |            |
|-------------------|------------|
| C(6)-C(1)-S(1)    | 109.94(8)  |
| C(6)-C(1)-C(2)    | 112.83(10) |
| C(3)-C(2)-C(1)    | 110.77(10) |
| C(4)-C(3)-C(2)    | 112.63(10) |
| C(3)-C(4)-C(5)    | 112.19(12) |
| C(7)-C(6)-C(1)    | 123.45(11) |
| C(6)-C(7)-C(8)    | 125.69(11) |
| C(9)-C(8)-C(7)    | 122.55(11) |
| C(13)-C(8)-C(7)   | 118.95(11) |
| C(13)-C(8)-C(9)   | 118.50(11) |
| C(10)-C(9)-C(8)   | 120.60(12) |
| C(11)-C(10)-C(9)  | 120.30(13) |
| C(10)-C(11)-C(12) | 119.73(12) |
| C(11)-C(12)-C(13) | 119.96(12) |
| C(12)-C(13)-C(8)  | 120.90(12) |
| N(1)-C(14)-C(15)  | 107.67(11) |
| O(3)-C(15)-C(14)  | 111.21(11) |
| O(3)-C(16)-C(17)  | 111.08(11) |
| N(1)-C(17)-C(16)  | 108.16(11) |

---



Table S-14. Anisotropic displacement parameters ( $\text{\AA}^2 \times 10^3$ ) for crystal02. The anisotropic displacement factor exponent takes the form:  $-2\pi^2 [ h^2 a^{*2} U^{11} + \dots + 2 h k a^* b^* U^{12} ]$

|       | U11   | U22   | U33   | U23   | U13   | U12   |
|-------|-------|-------|-------|-------|-------|-------|
| S(1)  | 12(1) | 11(1) | 11(1) | -1(1) | 4(1)  | -3(1) |
| O(1)  | 24(1) | 11(1) | 23(1) | 0(1)  | 11(1) | -2(1) |
| O(2)  | 15(1) | 26(1) | 12(1) | -3(1) | 2(1)  | -7(1) |
| O(3)  | 22(1) | 22(1) | 21(1) | 0(1)  | 12(1) | 1(1)  |
| N(1)  | 16(1) | 16(1) | 13(1) | 3(1)  | 7(1)  | 2(1)  |
| C(1)  | 10(1) | 10(1) | 11(1) | 0(1)  | 3(1)  | -1(1) |
| C(2)  | 12(1) | 12(1) | 13(1) | -1(1) | 5(1)  | 0(1)  |
| C(3)  | 11(1) | 16(1) | 14(1) | 1(1)  | 4(1)  | 0(1)  |
| C(4)  | 18(1) | 20(1) | 19(1) | -2(1) | 10(1) | -1(1) |
| C(5)  | 22(1) | 29(1) | 28(1) | 2(1)  | 15(1) | -4(1) |
| C(6)  | 11(1) | 13(1) | 12(1) | 1(1)  | 2(1)  | 0(1)  |
| C(7)  | 11(1) | 14(1) | 12(1) | 0(1)  | 2(1)  | 0(1)  |
| C(8)  | 11(1) | 14(1) | 11(1) | -2(1) | 3(1)  | -2(1) |
| C(9)  | 15(1) | 16(1) | 14(1) | -1(1) | 3(1)  | 1(1)  |
| C(10) | 15(1) | 21(1) | 16(1) | 2(1)  | 2(1)  | 2(1)  |
| C(11) | 16(1) | 29(1) | 12(1) | -2(1) | 2(1)  | -4(1) |
| C(12) | 18(1) | 26(1) | 15(1) | -7(1) | 6(1)  | -3(1) |
| C(13) | 13(1) | 18(1) | 17(1) | -4(1) | 5(1)  | 0(1)  |
| C(14) | 18(1) | 23(1) | 13(1) | 4(1)  | 7(1)  | 3(1)  |
| C(15) | 24(1) | 23(1) | 19(1) | 4(1)  | 12(1) | 1(1)  |
| C(16) | 18(1) | 24(1) | 23(1) | 4(1)  | 10(1) | 4(1)  |
| C(17) | 21(1) | 16(1) | 22(1) | 7(1)  | 12(1) | 4(1)  |

Table S-15. Hydrogen coordinates ( $\times 10^4$ ) and isotropic displacement parameters ( $\text{\AA}^2 \times 10^3$ ) for crystal02.

|        | x    | y    | z     | U(eq) |
|--------|------|------|-------|-------|
| H(1)   | 3809 | 4223 | 3327  | 13    |
| H(2A)  | 3691 | 6680 | 4811  | 15    |
| H(2B)  | 2742 | 8262 | 3881  | 15    |
| H(3A)  | 1471 | 5115 | 3359  | 16    |
| H(3B)  | 2431 | 3264 | 4072  | 16    |
| H(4A)  | 1536 | 6898 | 5045  | 22    |
| H(4B)  | 2520 | 5104 | 5770  | 22    |
| H(5A)  | 764  | 3776 | 5741  | 37    |
| H(5B)  | 1241 | 1868 | 5118  | 37    |
| H(5C)  | 257  | 3664 | 4395  | 37    |
| H(6)   | 2285 | 7535 | 1747  | 16    |
| H(7)   | 2810 | 2813 | 1519  | 15    |
| H(9)   | 800  | 7474 | 156   | 19    |
| H(10)  | -503 | 7467 | -1715 | 23    |
| H(11)  | -513 | 4352 | -2920 | 24    |
| H(12)  | 752  | 1170 | -2231 | 24    |
| H(13)  | 2051 | 1161 | -356  | 19    |
| H(14A) | 4520 | 8982 | 1187  | 22    |
| H(14B) | 4266 | 6206 | 911   | 22    |
| H(15A) | 5514 | 7563 | 89    | 25    |
| H(15B) | 6385 | 8503 | 1288  | 25    |
| H(16A) | 7412 | 5819 | 2689  | 25    |
| H(16B) | 7245 | 3017 | 2467  | 25    |
| H(17A) | 5409 | 3231 | 2480  | 23    |
| H(17B) | 6304 | 4338 | 3632  | 23    |

# VI. <sup>1</sup>H NMR Spectra

JC9121A CDCl3  
exp20 PROTON

|                   |                |               |          |
|-------------------|----------------|---------------|----------|
| SAMPLE            | Dec 18 2012    | PRESATURATION | n        |
| solvent           | cdcl3          | satmode       | n        |
| file              | /home/jwchoi/~ | SPECIAL       | not used |
| nmr sys           | /data/JC912~   | temp          | not used |
| 1A_CDCl3/PROTON01 |                | gain          | not used |
| ACQUISITION       |                | spin          | 20       |
| SW                | 8000.0         | hst           | 0.008    |
| at                | 2.500          | pw90          | 9.700    |
| np                | 40000          | atfa          | 6.600    |
| fb                | not used       | FLAGS         |          |
| bs                | 32             | f1            | n        |
| d1                | 1.000          | in            | n        |
| d2                | 16             | dp            | y        |
| ct                | 16             | hs            | nm       |
| td                | H1             | l1            | 0.20     |
| sfrq              | 499.708        | fn            | not used |
| tof               | 499.7          | DISPLAY       |          |
| tpwr              | 61             | SP            | -0.1     |
| pw                | 4.850          | wp            | 4996.8   |
| DECOUPLER         | C13            | rfl           | 4630.1   |
| dn                | 0              | rfp           | 3627.9   |
| dof               | 0              | rp            | 3.9      |
| dm                | nmn            | lp            | 5.2      |
| decwave           | g              | WC            | 250      |
| dpwr              | 35             | SC            | 0        |
| dmf               | 32258          | VS            | 49       |
|                   |                | th            | 54       |
|                   |                | ai            | cdc      |
|                   |                |               | ph       |

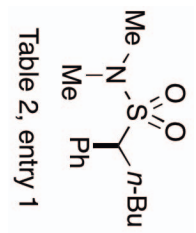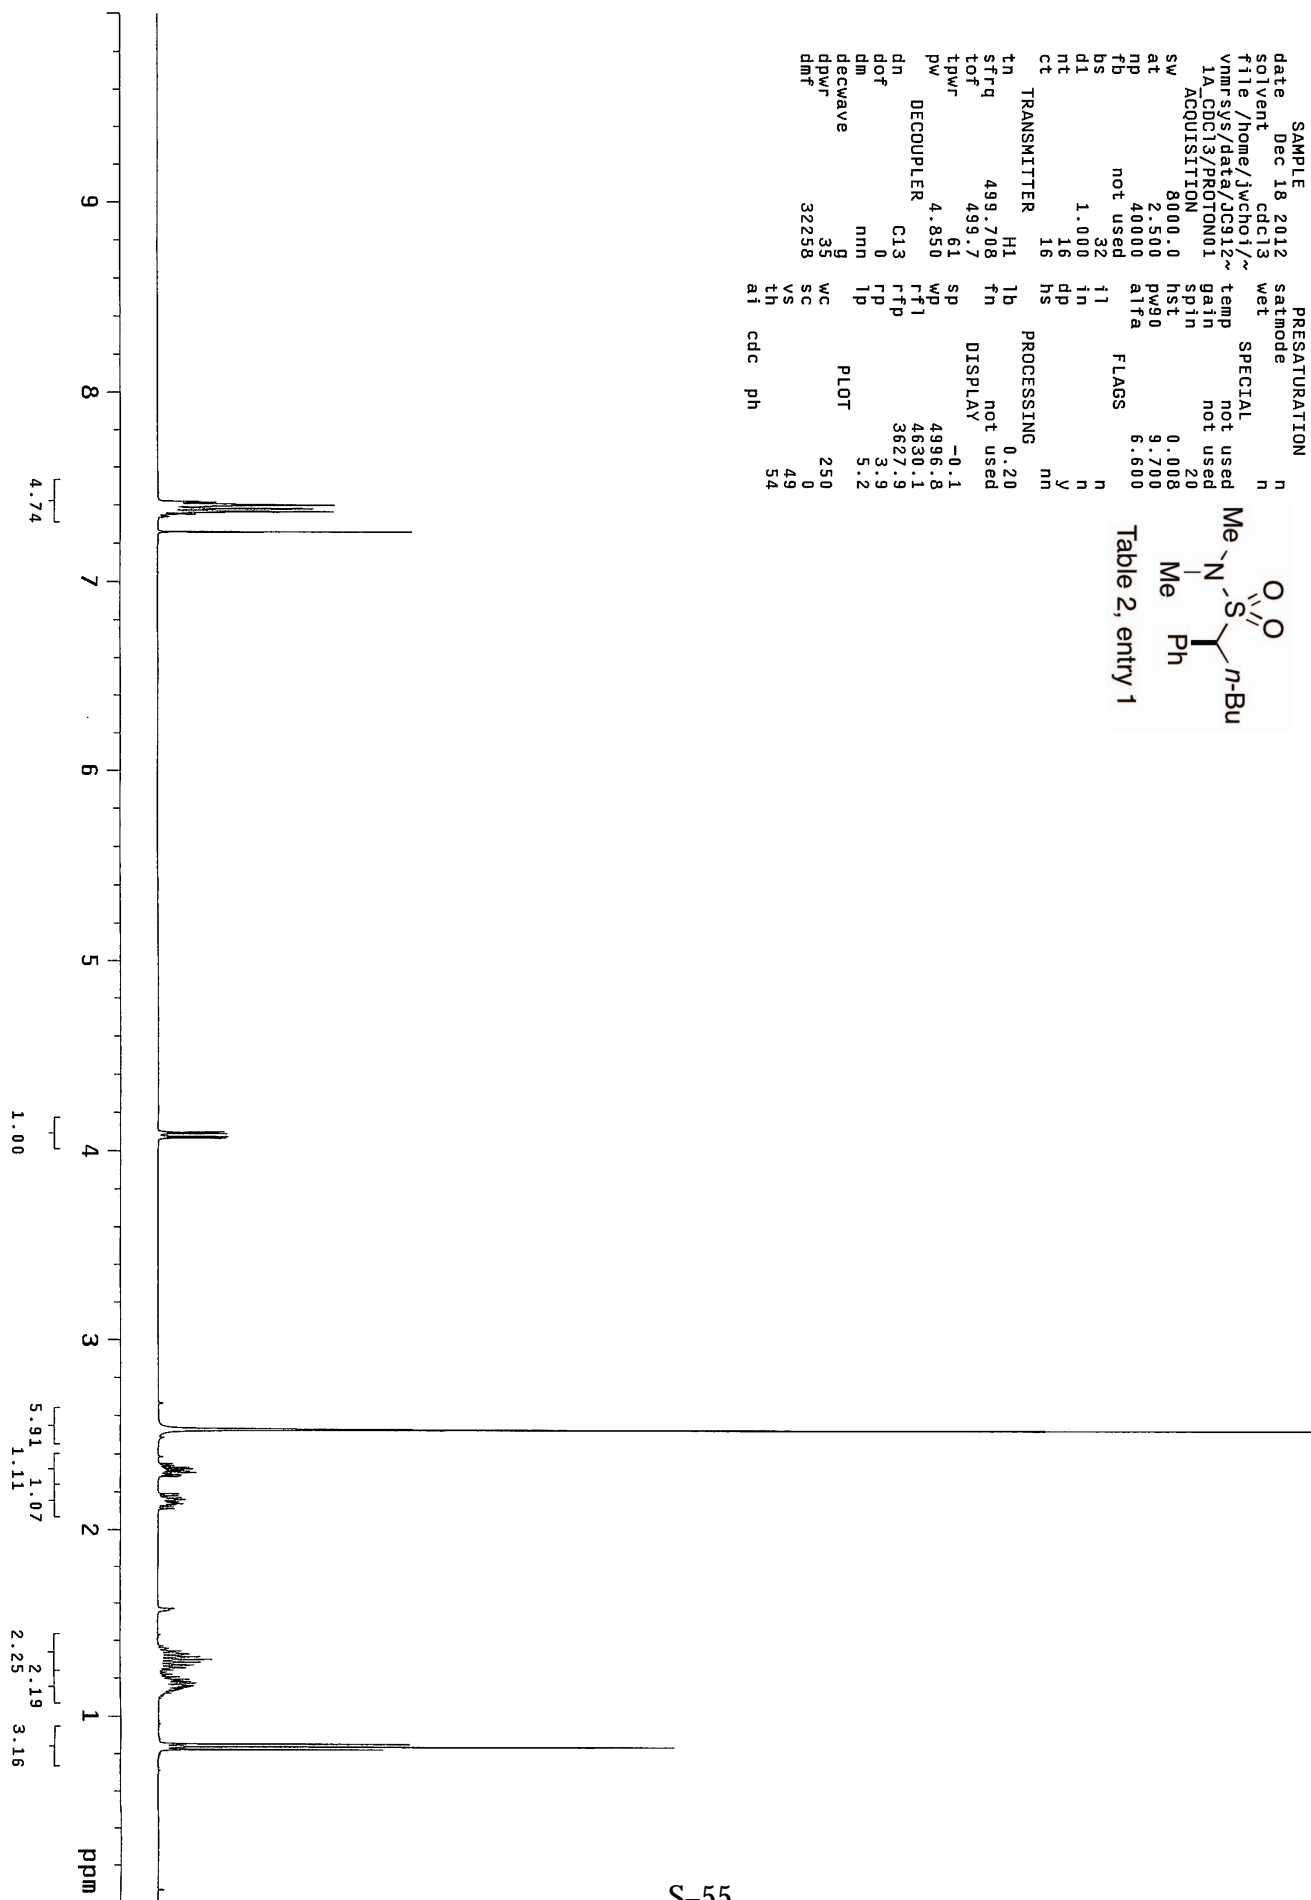

JC9153A CDC13

exp23 PROTON

SAMPLE PRESATURATION  
 date Jan 13 2013 satmode n  
 solvent cdc13 wet n  
 file /data/indy/jw~ SPECIAL  
 Choi/vnmr/sys/data/~ temp not used  
 JC9153A\_CDC13/PROT~ gain 30  
 ON01.fid spin 20  
 hst 0.008  
 pw90 9.700  
 alpha 10.000  
 ACQUISITION  
 SW 7995.2  
 at 3.000  
 np 47972  
 fb 4000  
 bs 32  
 dl 1.000  
 nt 16  
 ct 16  
 TRANSMITTER H1  
 tn 499.708  
 sfrq 499.7  
 tof 61  
 tpwr 4.850  
 pw 4.850  
 DECOUPLER C13  
 dn 0  
 dof 0  
 dm nmn  
 decwvave 9  
 dpwr 35  
 vs 22  
 dmf 32258  
 at cdc ph  
 PROCESSING 0.20  
 not used  
 DISPLAY  
 -0.1  
 4997.0  
 4627.6  
 3627.9  
 46.6  
 -82.6  
 PLOT  
 WC 250  
 SC 0  
 VS 22  
 TH 50  
 AT cdc ph

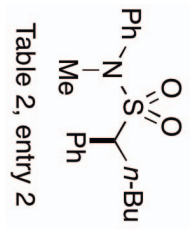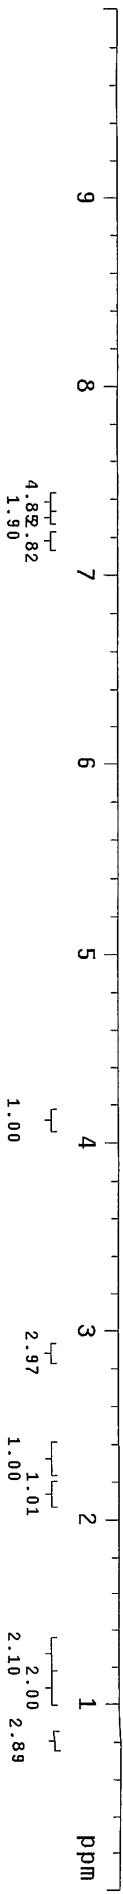

JC9149B 1H CDC13  
exp23 PROTON

SAMPLE PRESATURATION  
 date Jan 13 2013 satmode n  
 solvent cdc13 wet n  
 file /data/indy/jw~ SPECIAL not used  
 Choi/vnmr/sys/data/~ temp 30  
 JC9149B\_1H\_CDC13/P~ gain 20  
 ROTOM04.fid spin 20  
 ACQUISITION hst 0.008  
 SW 7995.2 pw90 9.700  
 at 3.000 alfa 10.000  
 np 47972  
 fb 4000 i1 n  
 bs 32 in n  
 dl 1.000 dp nm  
 nt 16 hs y  
 ct 16  
 TRANSMITTER H1 fb not used  
 tn 499.708 H1 fn not used  
 sfrq 499.708 SP DISPLAY  
 tof 499.7 WP 4997.0  
 tpwr 61 rff1 4627.8  
 pw 4.850 rffp 3627.9  
 DECOUPLER C13 rfp 43.5  
 dn 0 tp -78.8  
 dof 0  
 dm nmh PLOT  
 decwave 9 WC 250  
 dpwr 35 SC 0  
 dmf 32258 VS 116  
 at1 cdc ph 32

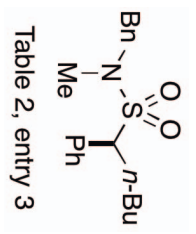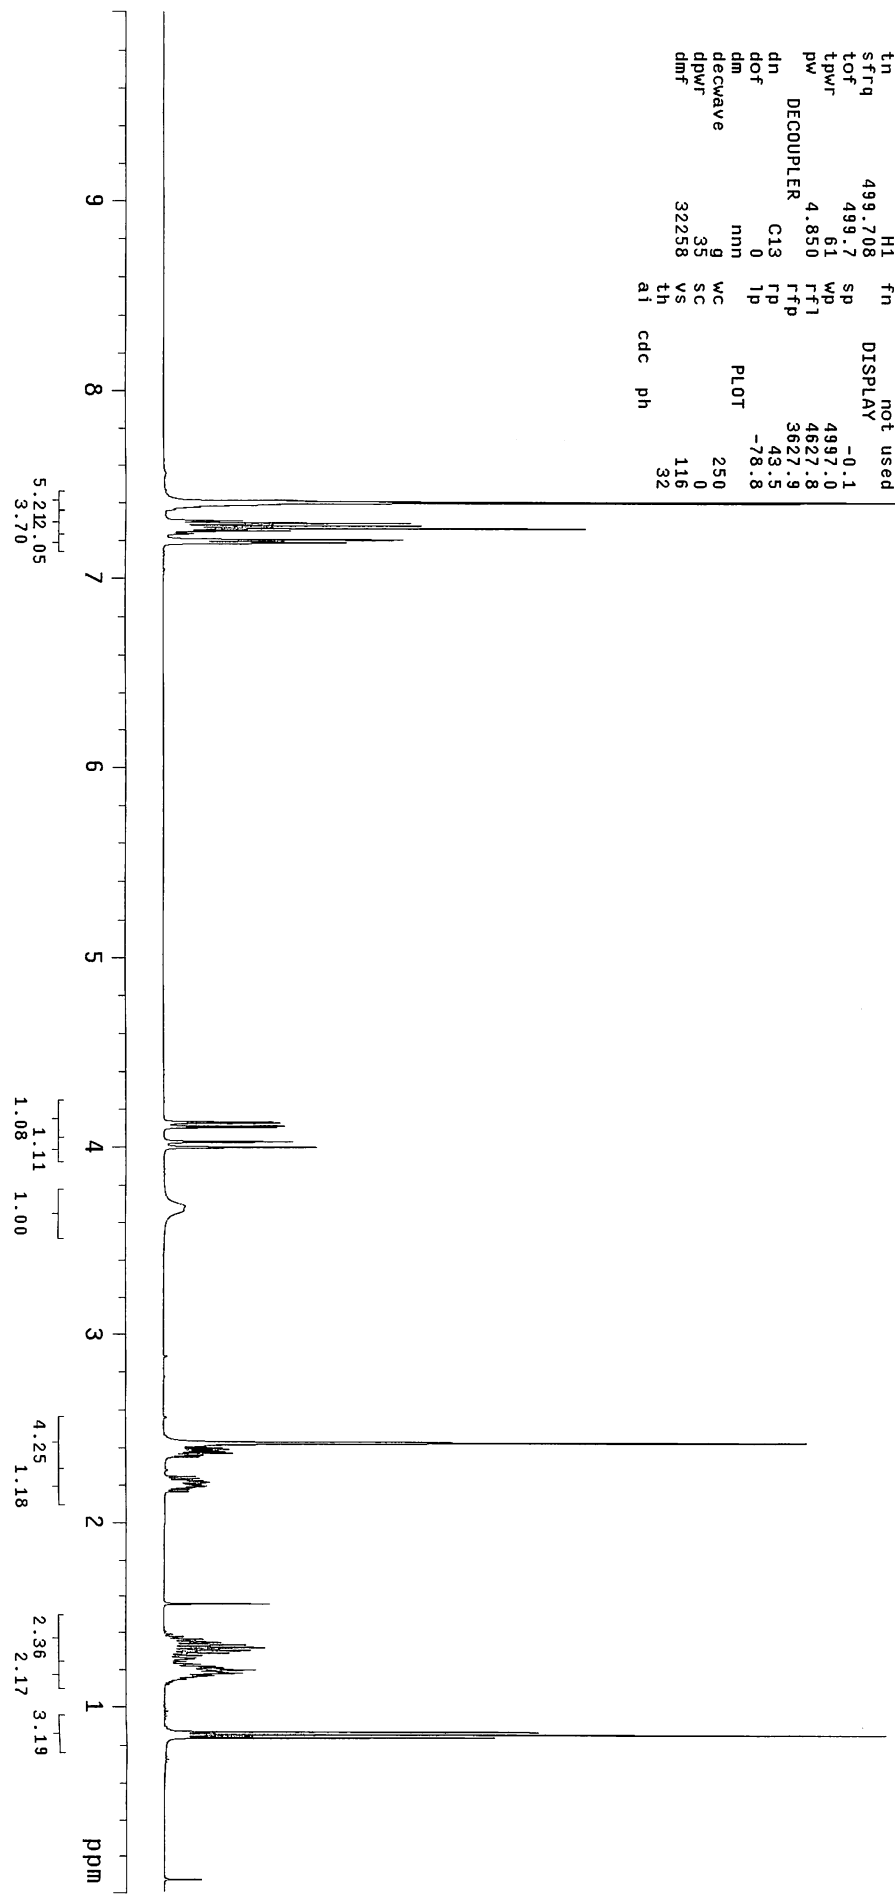

JC9147A 1H CDC13  
exp23 PROTON

SAMPLE PRESATURATION  
 date Jan 3 2013 satmode n  
 solvent cdc13 wet n  
 file /data/inhy/jw SPECIAL not used  
 ch01/vmr/sys/data/~ gain 46  
 JC9147A\_1H.CDC13/P~ ROTON01.fid spin 20  
 ACQUISITION hst 0.008  
 7995.2 PW90 9.700  
 SW 3.000 alfa 10.000  
 NP 47972  
 FB 4000 I1 n  
 BS 32 IN n  
 D1 1.000 DP nm  
 NT 16 HS y  
 CT 16  
 TRANSMITTER H1  
 TN 499.708 1b 0.20  
 SFRq 499.7 fn not used  
 TOF 61 SP DISPLAY  
 TPWR 4.850 WP 4997.0  
 PW DECOUPLER rffl 4627.6  
 C13 rfp 3627.9  
 0 1p 47.0  
 dn dof 0 PLOT -86.6  
 dm mn 250  
 decwave g WC 0  
 dpwr 35 SC 0  
 dmf 32258 VS 24  
 th 35

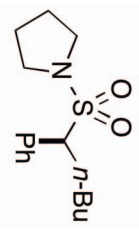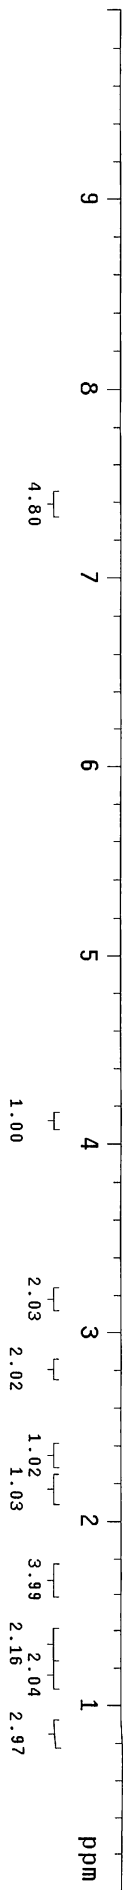

JC9155 1H CDC13  
 exp23 PROTON

SAMPLE PRESATURATION  
 date Jan 17 2013 satmode n  
 solvent cdc13 wet SPECIAL n  
 f1le /data/indy/Jw~ temp not used  
 Choi/vnmr/sys/data/~ gain 44  
 JC9155\_1H.CDC13/PR~ spin 20  
 OTOM01.fid hst 0.008  
 ACQUISITION pw90 9.700  
 7995.2 pw90 10.000  
 at 3.000 alfa  
 np 47972  
 fb 4000 i1  
 bs 32 in n  
 d1 1.000 dp n  
 nt 16 hs y  
 ct 16  
 TRANSMITTER 1b  
 tn H1 fn not used  
 sfrq 499.708 DISPLAY  
 tof 499.7 SP -0.1  
 tpwr 61 WP 4997.0  
 pw 4.850 rff1 4627.8  
 DECOUPLER rfp 3627.9  
 dn C13 fp 47.0  
 dof 0 1p -86.3  
 dm mnm PLOT  
 decwve 250  
 dpwr 9 WC 0  
 35 SC 50  
 32258 th 50  
 dmf ai cdc ph

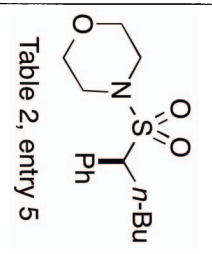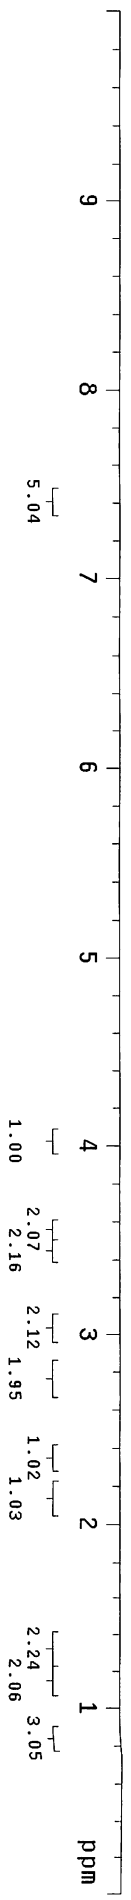

JC10093B 1H CDC13  
 exp24 PROTON

|                     |                |               |          |
|---------------------|----------------|---------------|----------|
| SAMPLE              |                | PRESATURATION |          |
| date                | May 14 2013    | satmode       | n        |
| solvent             | cdcl3          | SPECIAL       | n        |
| file                | /indy/jwcho1/~ | not used      |          |
| nmrSYS              | /data/JC100~   | gain          | 32       |
| 93B_1H_CDC13/PROT0~ |                | spin          | 20       |
|                     |                | hst           | 0.008    |
| ACQUISITION         | N01.fid        | pw90          | 9.900    |
|                     |                | aiFa          | 10.000   |
| SW                  | 8000.0         | FLAGS         |          |
| at                  | 3.000          |               |          |
| np                  | 48000          |               |          |
| fb                  | not used       |               |          |
| bs                  | not used       |               |          |
| d1                  | 2.000          |               |          |
| nt                  | 16             |               |          |
| ct                  | 16             |               |          |
| TRANSMITTER         | H1             | PROCESSING    | 0.20     |
| tn                  | 499.708        | fn            | not used |
| sfrq                | 499.7          | DISPLAY       |          |
| tof                 | 61             | wp            | -0.1     |
| tpwr                | 4.950          | rf1           | 4996.8   |
| pw                  | DECOUPLER      | rfp           | 4630.1   |
| dn                  | C13            | rp            | 3627.9   |
| dof                 | 0              | lp            | 6.8      |
| dm                  | nm             |               | -79.6    |
| dm                  | nm             | PLOT          | 250      |
| decwave             | w40_autox7~    | WC            | 0        |
| dpwr                | 41             | VS            | 65       |
| dmf                 | 32258          | th            | 13       |
|                     | ai             | cdc           | ph       |

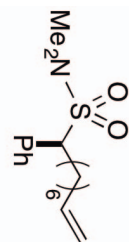

Table 2, entry 6

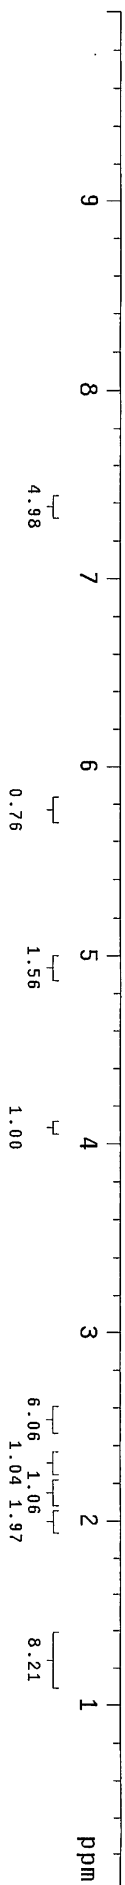



PM2-21A 1H CDC13  
 exp30 PROTON

SAMPLE date Oct 21 2013 satmode n  
 solvent cdc13 wet SPECIAL n  
 file /indy/jwchoi/~ vnmr/svs/data/PM2-2~ gain temp not used 26  
 1A\_1H\_CDC13/PROTON~ 01.fid hst 0.008 20  
 ACQUISITION 8000.0 pw90 9.900  
 SW 3.000 a1fa 10.000  
 AT 48000  
 NP not used  
 FB 32 in  
 BS 2.000 dp  
 D1 16 hs  
 NT 16  
 CT 16  
 TRANSMITTER 1b  
 TN H1 fn 0.20  
 SFrq 499.698 DISPLAY not used  
 TOF 499.7 SP -499.9  
 TPWR 61 WP 5496.6  
 PW 4.950 rfp 4632.1  
 DECOUPLER C13 rfp 3627.8  
 DN 0 1p -87.1  
 DOF 0 1p -73.6  
 DM nnn PLOT 250  
 decwave w40\_autoxr~ wc 0  
 991 sc 16  
 41 vs 25  
 dpwr 32258  
 dmf at cdc ph

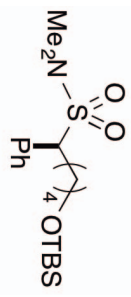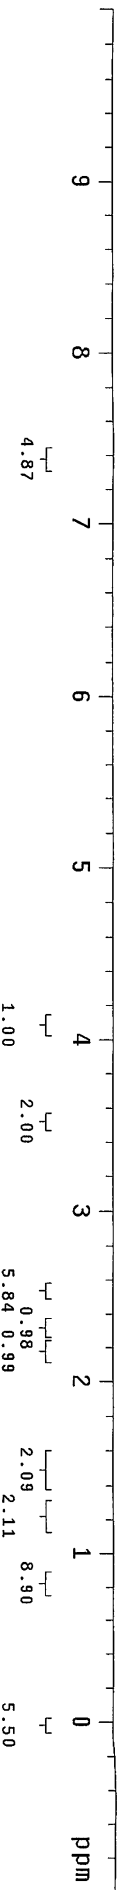

JG9221B 1H CDC13  
 exp23 PROTON

SAMPLE date Feb 22 2013  
 solvent cdc13  
 file /data/indy/Jw~  
 Choi/vmr/sys/data/~  
 JG9221B\_1H\_CDC13/P~  
 ROTOM01.fid  
 ACQUISITION  
 SW 8000.0  
 at 3.000  
 np 48000  
 fb not used  
 bs 32  
 d1 1.000  
 nt 32  
 ct 32  
 TRANSMITTER H1  
 tn 499.708  
 sfrq 499.7  
 tof 61  
 tpwr 4.850  
 pw 4.850  
 DECOUPLER C13  
 dn 0  
 dof 0  
 dm nmh  
 decwve 9  
 dpwr 35  
 dmf 32258  
 PRESATURATION satmode n  
 wet cdc13  
 SPECIAL not used  
 temp 30  
 gain 20  
 sp in  
 hst 0.008  
 pw90 9.700  
 alfa 10.000  
 FLAGS n  
 in n  
 dp n  
 hs y  
 nm  
 PROCESSING 0.20  
 lb not used  
 fn not used  
 DISPLAY -0.1  
 sp 4996.8  
 wp 4630.1  
 tffl 3627.9  
 tffp 46.0  
 fp -72.7  
 lp PLOT  
 wc 250  
 sc 0  
 vs 111  
 th 13  
 ai cdc ph

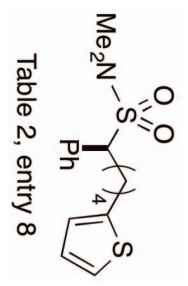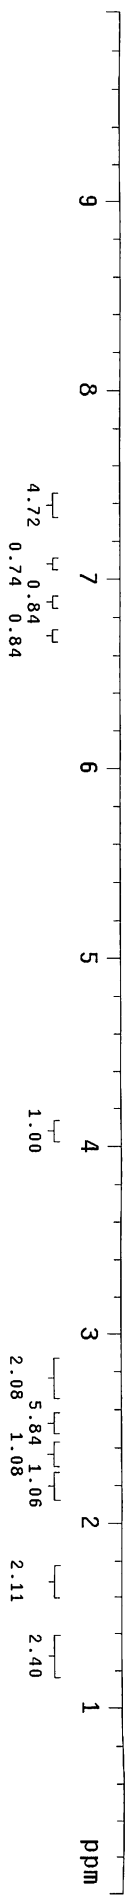

JC12043A CDC13  
exp57 PROTON

|                    |                |            |          |
|--------------------|----------------|------------|----------|
| SAMPLE             | Jun 18 2014    | satmode    | n        |
| solvent            | CDCl3          | wet        | n        |
| file               | /indy/heini/sc | SPECIAL    | not used |
| h/vnmr             | sys/data/JC13  | temp       | 26       |
| 2043A_CDC13/PROTON | 01.fid         | gain       | 20       |
| ACQUISITION        | 8000.0         | spin       | 9.900    |
| at                 | 3.000          | hst        | 10.000   |
| np                 | 48000          | pw90       | 9.900    |
| fb                 | not used       | alpha      | 10.000   |
| bs                 | not used       | flags      | n        |
| d1                 | 2.000          | il         | n        |
| d2                 | 16             | in         | n        |
| nt                 | 16             | dp         | Y        |
| ct                 | 16             | hs         | nn       |
| TRANSMITTER        | H1             | tb         | 0.20     |
| fn                 | fn             | PROCESSING | not used |
| sfrq               | 499.689        | sp         | -0.2     |
| tof                | 499.7          | wp         | 4996.8   |
| tpwr               | 61             | rf1        | 4635.7   |
| pw                 | 4.950          | rfp        | 3627.7   |
| DECOUPLER          | C13            | rfp        | -166.7   |
| dn                 | 0              | tp         | -78.7    |
| dof                | 0              | PLOT       | 250      |
| dm                 | nmn            | WC         | 0        |
| decwv              | W40_autox7~    | SC         | 64       |
| dpwr               | 91             | VS         | 25       |
| dmf                | 32258          | th         | 25       |
|                    | ai             | cdc        | ph       |

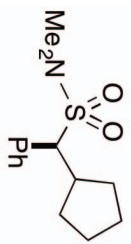

Table 2, entry 9

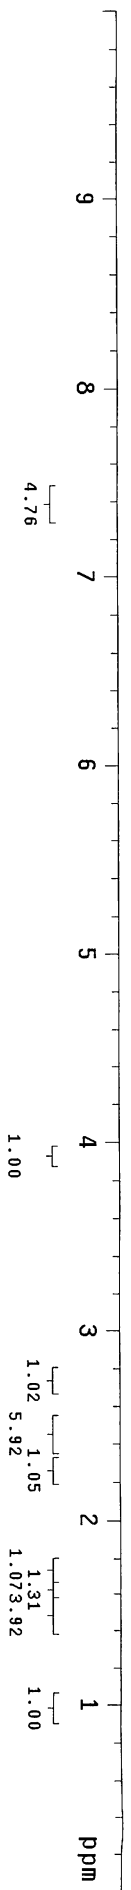

JC9111B 1H CDC13  
 exp23 PROTON

SAMPLE Dec 9 2012 satmode n  
 date Dec 9 2012 satmode n  
 solvent cdcl3  
 file /data/indy/jw~  
 JC9111B\_1H\_CDC13/P~  
 ROTON03.fid  
 ACQUISITION  
 sw 8000.0 pw90 9.700  
 at 2.500 aifa 6.600  
 np 40000  
 fb not used  
 bs 32 in n  
 d1 1.000 dp hs n  
 nt 16  
 ct 16  
 TRANSMITTER H1  
 tn 499.708 1b 0.20  
 sfrq 499.708 fn not used  
 tof 499.708 sp DISPLAY  
 tpwr 61 wp -0.1  
 pw 4.850 rft 4996.8  
 dn C13 rfp 4630.1  
 dof 0 1p 3627.9  
 dm mnn 5.2  
 decwve g 5.6  
 dpwr 33 WC 250  
 dmf 3258 VS 0  
 ai cdc ph th 37  
 54

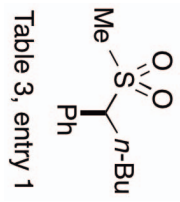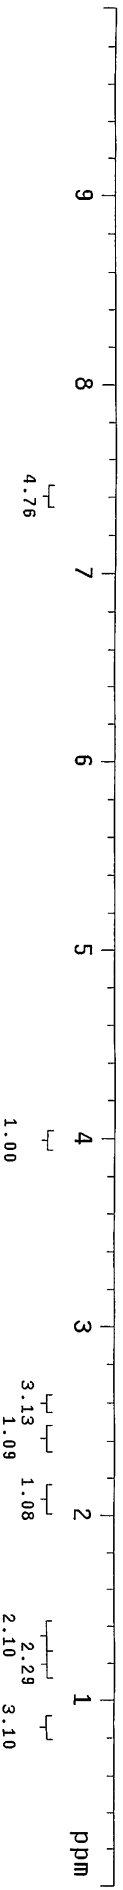

JC10185 CDC13  
 exp23 PROTON

SAMPLE date Jul 19 2013 PRESATURATION satmode n  
 solvent cdc13 wet SPECIAL n  
 file /Indy/jwchoi/ vnmr/sys/data/JC10185\_CDC13/PROTON01.~ temp gain not used  
 85\_CDC13/PROTON01.~ fid hst spin 32 20  
 ACQUISITION sw 8000.0 pw90 0.008  
 at 3.000 alfa 10.000  
 np 48000  
 fb not used  
 bs 32 in  
 d1 2.000 dp  
 nt 16 hs  
 ct 16  
 TRANSMITTER tn 1b PROCESSING 0.20  
 tn H1 fn not used  
 sfrq 499.698 DISPLAY  
 tof 499.7 sp -0.1  
 tpwr 61 wp 4996.8  
 pw 4.950 rffl 1001.8  
 DECOUPLER dn C13 rfp 0  
 dn 0 tp -76.4  
 dof 0  
 dm mn PLOT -76.7  
 decwave W40\_autox7~ wc 250  
 991 vs 0  
 41 vt 59  
 32258 th 13  
 dmf at cdc ph

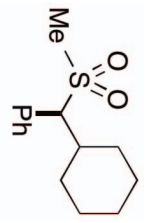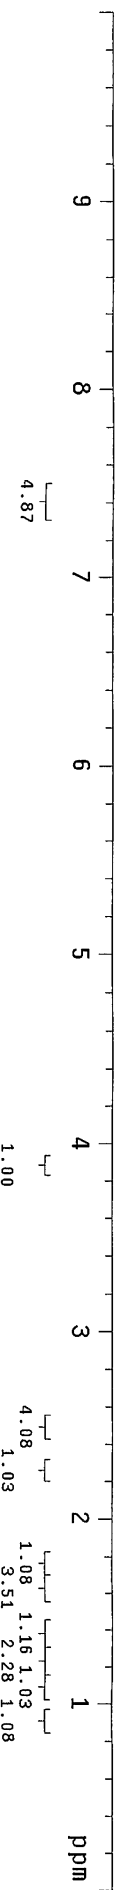

JC10181 CD2C12  
 exp2 PROTON

SAMPLE 7 2013 PRESATURATION  
 date Aug cd2c12 satmode n  
 solvent cd2c12 wet n  
 file /Indy/jwchoi/~ SPECIAL  
 vnmr sys/data/JC101~ not used  
 81\_CD2C12/PROTON02~ gain 20  
 .fid spin 20  
 ACQUISITION hst 0.008  
 SW 8000.0 pw90 9.900  
 at 3.000 aifa 10.000  
 np 48000 FLAGS  
 fb not used 11 n  
 bs 32 in 32 n  
 d1 5.000 dp 16 y  
 nt 16 hs 16 nm  
 ct 16  
 TRANSMITTER 1b 1b PROCESSING 0.20  
 tn H1 fn not used  
 sfreq 499.699 DISPLAY  
 tof 499.7 SP -0.1  
 tpwr 61 WP 4998.8  
 pw 4.950 rftl 3669.9  
 DECOUPLER C13 rfp 2658.4  
 dn C13 tp -67.4  
 dof 0 1p -76.2  
 dm nnn WC 250  
 decouple w40\_autok7~ 991 SC 0  
 dpwr 41 VS 284  
 dmf 32258 th 41  
 ai cdc ph

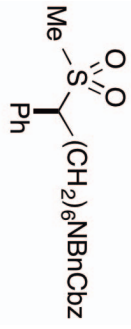

Table 3, entry 3

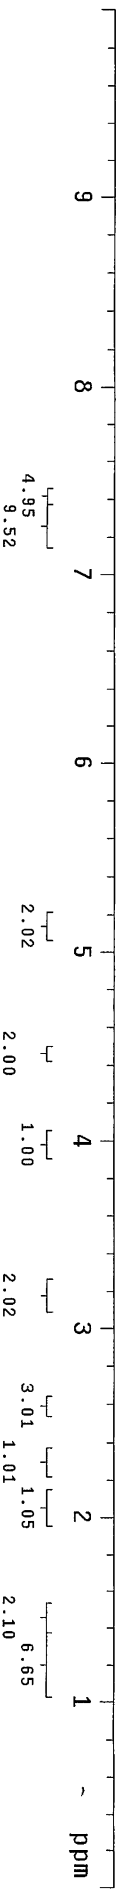

PM 2-20A CDC13  
exp27 PROTON

SAMPLE 1 2013  
date Aug 1 2013  
solvent cdcl3  
file /indy/jwchoi/~  
vnmr/sv/data/PM\_2-~  
20A\_CDC13/PROTON01~  
ACQUISITION  
sw 8000.0  
at 3.000  
np 48000  
fb not used  
bs 32  
d1 2.000  
nt 16  
ct 16  
tn H1  
sfreq 499.698  
tof 499.7  
tpwr 4.950  
pw 4.950  
dn C13  
dof 0  
dm nm  
decwave w40\_autox7~  
dpmr 41  
dmf 32258

PRESATURATION  
satmode n  
wet SPECIAL  
temp not used  
gain 32  
spin 20  
hst 0.008  
pw90 9.900  
atfa 10.000

PROCESsing  
0.20  
not used  
DISPLAY  
-0.1  
4996.8  
4632.1  
3627.8  
-85.4  
-74.5

PLOT  
250  
0  
63  
13

ai cdc ph

Table 3, entry 4

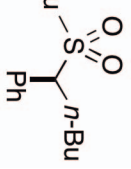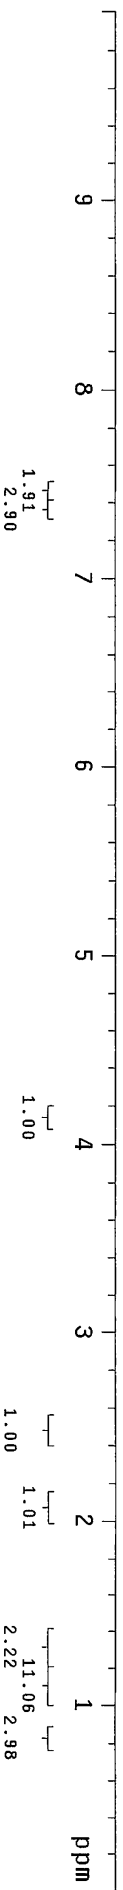

JC9119A CDC13  
exp30 PROTON

|                     |                 |                     |                 |            |          |
|---------------------|-----------------|---------------------|-----------------|------------|----------|
| date                | Dec 14 2012     | SAMPLE              | Dec 14 2012     | satmode    | n        |
| solvent             | cdc13           | solvent             | cdc13           | wet        | n        |
| file                | /data/jindy/jw~ | file                | /data/jindy/jw~ | SPECIAL    | n        |
| ChOI/VmtrSYs/data/~ |                 | ChOI/VmtrSYs/data/~ |                 | temp       | not used |
| JC9119A_CDC13/PROT~ |                 | JC9119A_CDC13/PROT~ |                 | gain       | not used |
| ON01.fid            |                 | ON01.fid            |                 | spin       | 20       |
| ACQUISITION         |                 | ACQUISITION         |                 | hst        | 0.008    |
| sw                  | 8000.0          | sw                  | 8000.0          | pw90       | 9.700    |
| at                  | 2.500           | at                  | 2.500           | alfa       | 6.600    |
| np                  | 40000           | np                  | 40000           | FLAGS      |          |
| fb                  | not used        | fb                  | not used        | 11         | n        |
| bs                  | 32              | bs                  | 32              | in         | n        |
| d1                  | 1.000           | d1                  | 1.000           | dp         | y        |
| nt                  | 16              | nt                  | 16              | hs         | nm       |
| ct                  | 16              | ct                  | 16              | PROCESSING | 0.20     |
| TRANSMITTER         |                 | TRANSMITTER         |                 | 1b         | fn       |
| tn                  | H1              | tn                  | H1              | not used   | DISPLAY  |
| sfrq                | 499.708         | sfrq                | 499.708         | SP         | -0.1     |
| tof                 | 499.7           | tof                 | 499.7           | WP         | 4996.8   |
| tpwr                | 61              | tpwr                | 61              | FT1        | 4630.1   |
| pw                  | 4.850           | pw                  | 4.850           | FFP        | 3627.9   |
| DECOUPLER           | C13             | DECOUPLER           | C13             | FP         | 4.4      |
| dn                  | 0               | dn                  | 0               | 1p         | 2.1      |
| dof                 | nmn             | dof                 | nmn             | WC         | 250      |
| decwve              | g               | decwve              | g               | SC         | 0        |
| dpwr                | 35              | dpwr                | 35              | VS         | 122      |
| dmf                 | 32258           | dmf                 | 32258           | th         | 2        |
|                     |                 |                     |                 | ai         | cdc ph   |

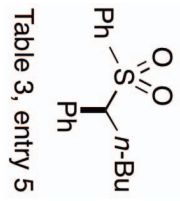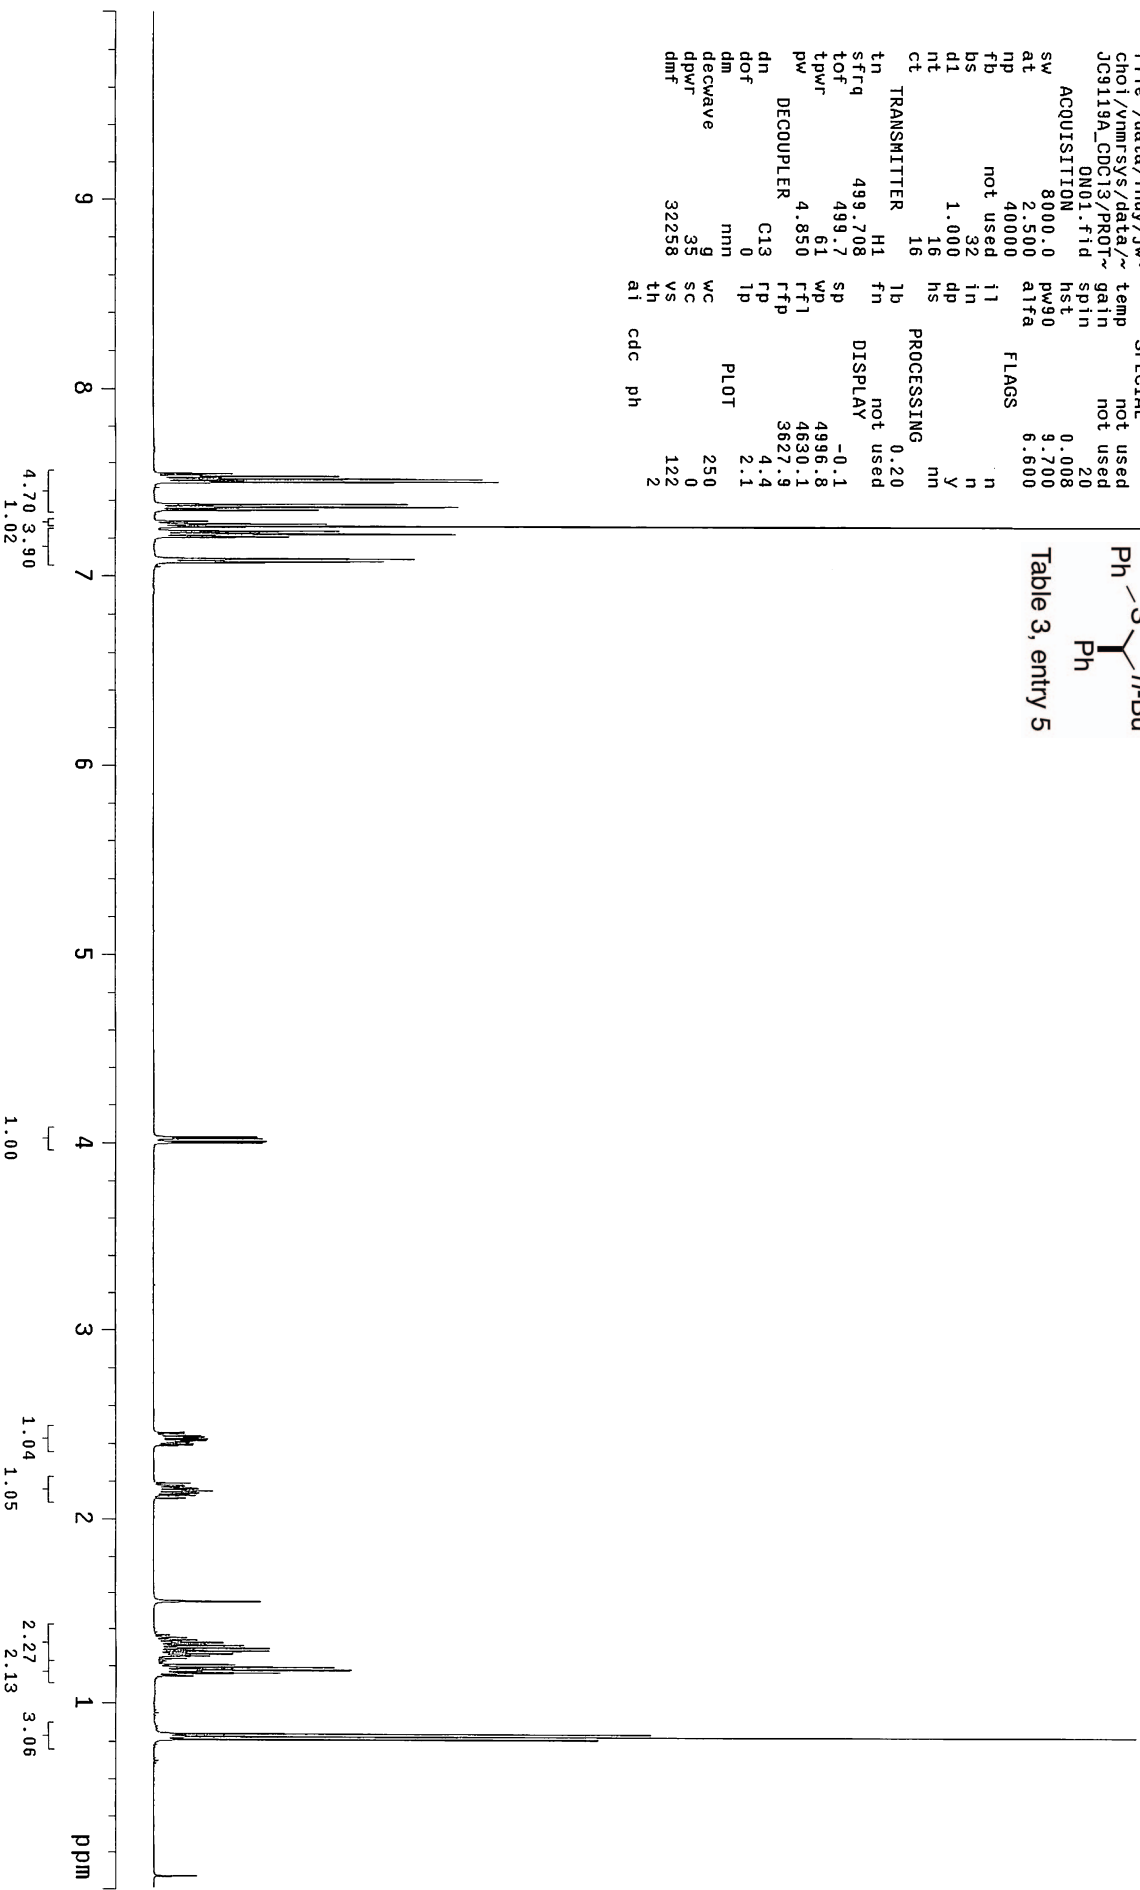



JC9229 CDC13  
 exp23 PROTON

SAMPLE PRESATURATION  
 date Feb 16 2013 satmode n  
 solvent cdc13 wet n  
 file /data/indy/jw~ SPECIAL not used  
 Choi/vmr/sys/data/~ temp 30  
 JC9229\_1H\_13C\_CDC1~ gain 20  
 3/PROTON02.fid spin 0.008  
 ACQUISITION hst 9.700  
 SW 8000.0 aifa 10.000  
 at 3.000  
 np 48000  
 fb not used  
 bs 32 in n  
 d1 1.000 dp n  
 nt 16 hs y  
 ct 16  
 TRANSMITTER 1b  
 tn H1 fn  
 sfra 499.708 . DISPLAY not used  
 tof 499.7 SP -0.1  
 tpwr 61 WP 4996.8  
 pw 4.850 rffl 4630.1  
 DECOUPLER C13 rfp 3627.9  
 dn 0 tp 43.7  
 dof 0 1p -71.3  
 dm mn 250  
 decwve g WC  
 dpwr 35 SC 0  
 dmf 32258 VS 45  
 ai cdc ph 50

Table 4, entry 1

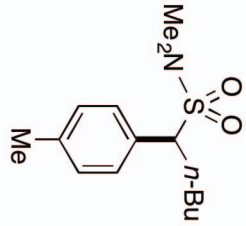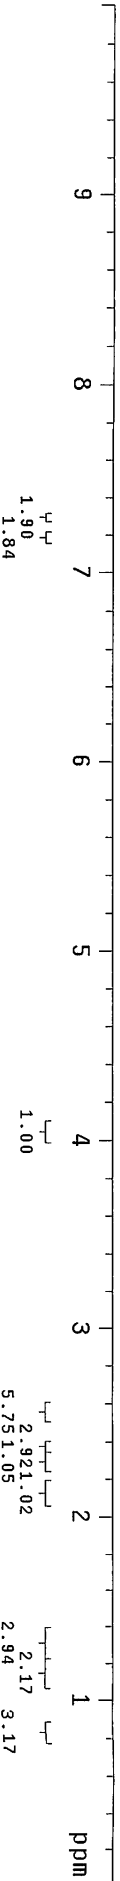

JC92198 CDC13  
 exp23 PROTON

SAMPLE date Feb 11 2013  
 solvent cdc13  
 F1 file /data/indy/jw~  
 ChOI/vmr/sys/data/~  
 JC92198\_1H\_13C.CDC~  
 13/PROTON01.Fid  
 ACQUISITION  
 SW 7995.2  
 at 3.000  
 np 47972  
 fb 4000  
 bs 32  
 dl 1.000  
 nt 16  
 ct 16  
 TRANSMITTER H1  
 tn 499.708  
 sfrq 499.7  
 tpwr 61  
 pw 4.850  
 DECOUPLER C13  
 dn 0  
 dof 0  
 dm 0  
 decwave 35  
 dpwr 32258  
 dmf 32258  
 PRESATURATION satmode n  
 wet not used  
 SPECIAL not used  
 temp 30  
 gain 20  
 spin 0.008  
 hst 9.700  
 pw90 10.000  
 a1fa 10.000  
 FLAGS n  
 i1 n  
 in n  
 dp n  
 hs y  
 PROCESSING 0.20  
 fn not used  
 DISPLAY -0.1  
 sp 4997.0  
 wd 4627.6  
 rffl 3627.9  
 tffp 55.7  
 tp -87.5  
 PLOT 250  
 wc 0  
 sc 11  
 vs 11  
 th 50  
 at cdc ph

Table 4, entry 2

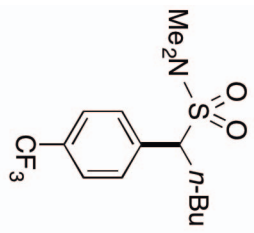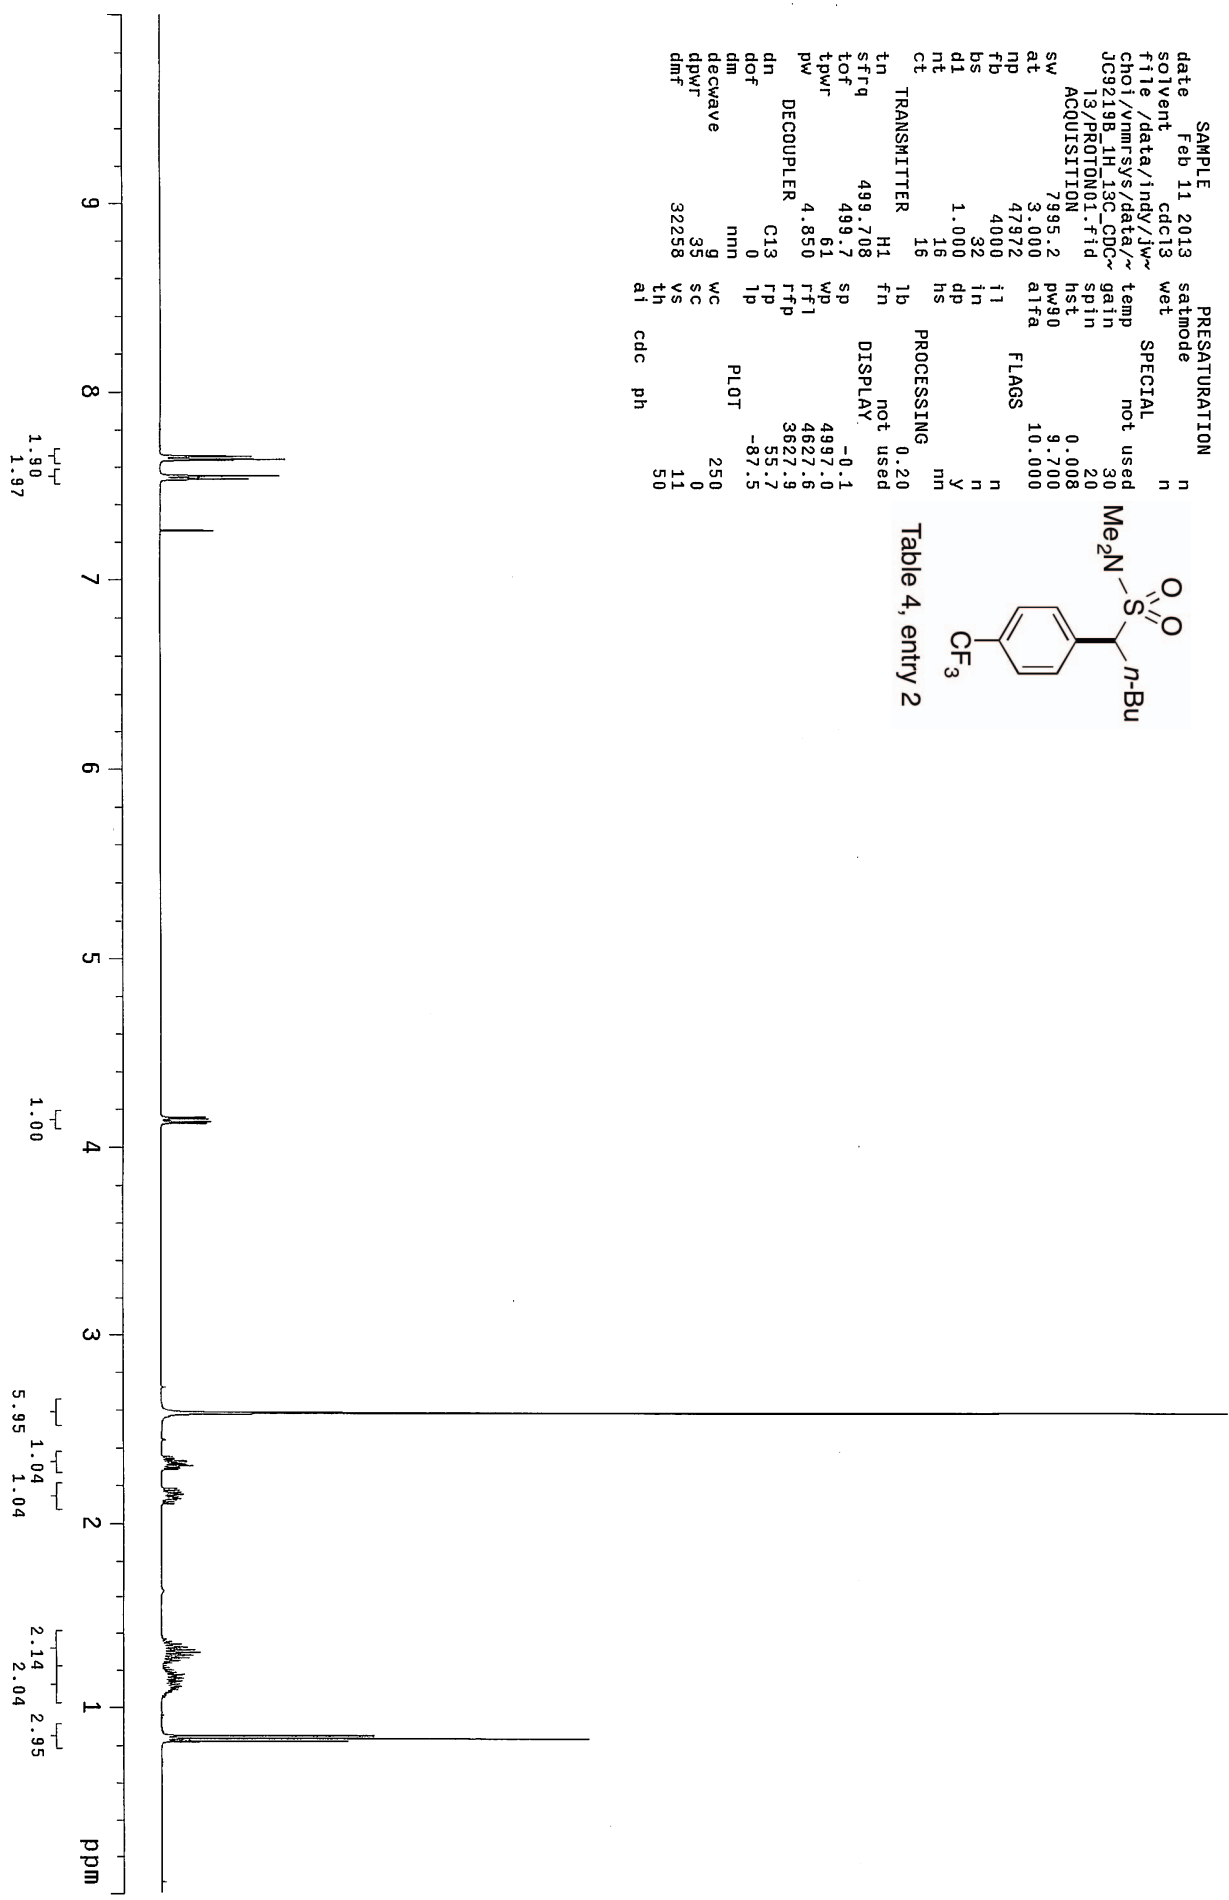

JC12077B 1H CDC13

exp64 PROTON

|             |                |               |          |
|-------------|----------------|---------------|----------|
| SAMPLE      |                | PRESATURATION |          |
| date        | Aug 3 2014     | satmode       | n        |
| solvent     | cdcl3          | wet           | n        |
| file        | /indy/jwchoi/~ | SPECIAL       |          |
| nmrsys      | /data/JC1207   | temp          | 25.0     |
| 77B_CDC13   | /PROTON02~     | gain          | 26       |
|             | .fid           | spin          | 0        |
| ACQUISITION |                | hst           | 0.008    |
| sw          | 8000.0         | pw90          | 9.900    |
| at          | 3.000          | alfa          | 10.000   |
| np          | 48000          | FLAGS         |          |
| fb          | not used       | il            | n        |
| bs          | 32             | in            | n        |
| d1          | 2.000          | dp            | Y        |
| nt          | 16             | hs            | nn       |
| ct          | 16             | PROCESSING    |          |
| tn          | TRANSMITTER    | lb            | 0.20     |
| fn          | H1             | fn            | not used |
| strq        | 499.689        | DISPLAY       |          |
| tof         | 499.7          | sp            | -0.2     |
| tpwr        | 61             | wp            | 5996.1   |
| pw          | 4.950          | rfl           | 1001.9   |
| DECOUPLER   |                | rfp           | 0        |
| dn          | C13            | ip            | -172.0   |
| dof         | 0              | lp            | -73.1    |
| dm          | nmn            | PILOT         |          |
| decwave     | W40_autok7~    | wc            | 234      |
| dpwr        | 991            | sc            | 8        |
| dmf         | 41             | vs            | 55       |
|             | 32258          | th            | 22       |
|             |                | ai            | cdc      |
|             |                |               | ph       |

Table 4, entry 3

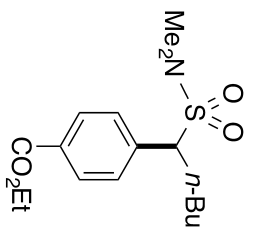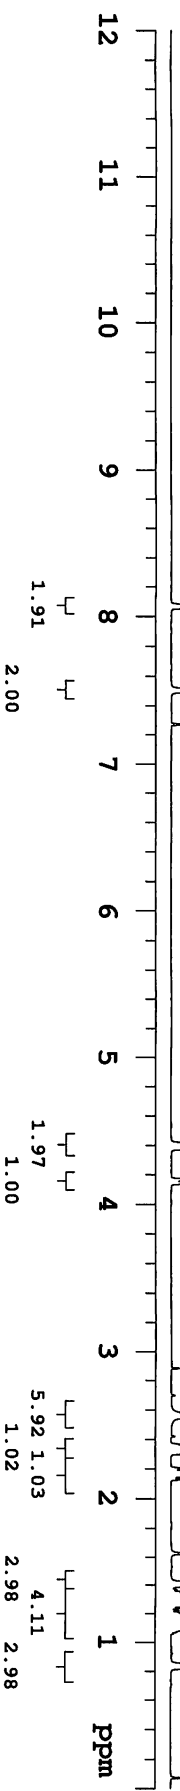

JC9159B CDC13  
 exp23 PROTON

SAMPLE PRESATURATION  
 date Jan 17 2013 satmode n  
 solvent cdc13 wet n  
 file /data/indy/jw~ SPECIAL not used  
 Choi/Vmmr/sys/data/~ gain 30  
 JC9159B\_CDC13/PROT~ spin 20  
 0N01.fid hst 0.008  
 ACQUISITION pw90 9.700  
 SW 7995.2 atfa 10.000  
 at 3.000  
 np 47972  
 fb 4000  
 bs 32  
 di 1.000  
 nt 16  
 ct 16  
 TRANSMITTER lb  
 tn H1 0.20  
 sfreq 499.708 fn not used  
 tof 499.7 sp DISPLAY  
 tpwr 61 wp 4997.0  
 pw 4.850 rft 4627.6  
 DECOUPLER C13 rfp 3627.9  
 dn 0 lp -86.6  
 dof 0  
 dm nmm  
 decwve g WC 250  
 dpwr 35 SC 0  
 dmf 32258 th VS 36  
 ai cdc ph 50

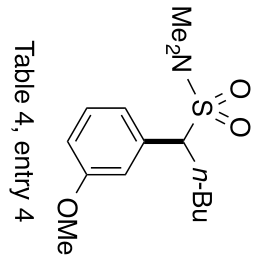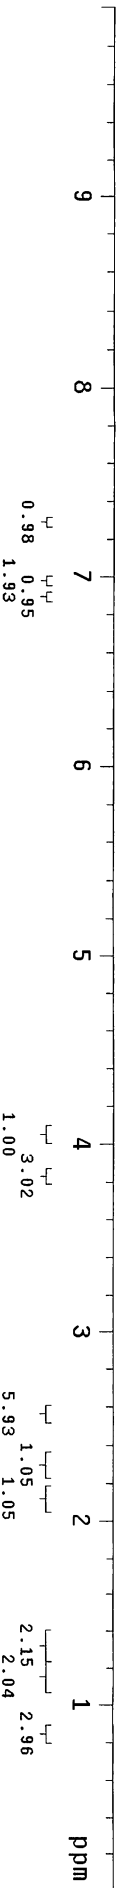

JC10223B CDC13  
 exp28 PROTON

SAMPLE PRESATURATION  
 date Aug 6 2013 satmode n  
 solvent cdc13 wet n  
 file /Indy/jwchoi/~ SPECIAL  
 Vnmr/sys/data/JC10223B\_CDC13/PROTON01~ gain temp not used  
 32  
 20  
 0.008  
 9.900  
 10.000  
 ACQUISITION  
 .fid hst  
 8000.0 pw90  
 3.000 atfa  
 48000  
 not used  
 32  
 2.000 dp  
 16 hs  
 16  
 16  
 TRANSMITTER  
 tn 1b  
 sfreq 499.698 fn  
 499.7 SP  
 tof 61 WP  
 4.950 rfp  
 3627.8  
 -84.4  
 -75.3  
 DECOUPLER C13 rf1  
 0 1p  
 dn dof 0 WC PLOT  
 dm dm nm  
 decouple w40\_autox?~ wc 250  
 991 sc 0  
 41 vs 24  
 32258 th 50  
 ai cdc ph

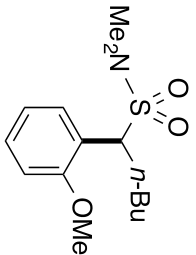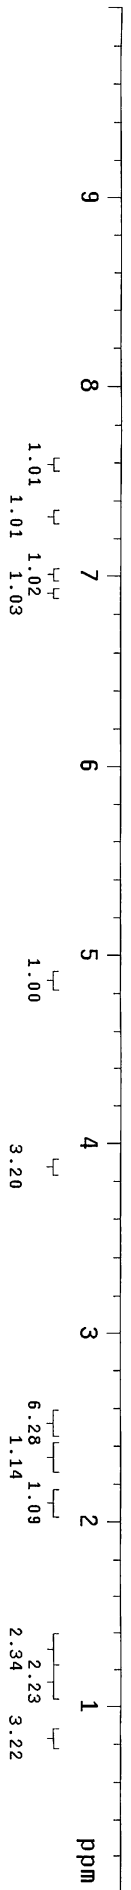

JC102098 CDC13  
 exp28 PROTON

SAMPLE date Aug 9 2013 satmode n  
 solvent cdc13 wet SPECIAL n  
 file /Indy/jwchoi/~ temp not used 20  
 vnmr/sys/data/JC102~ gain 20  
 09B\_CDC13/PROTON01~ .fid hst 0.008  
 ACQUISITION .fid hst 20  
 sw 8000.0 pw90 9.900  
 at 3.000 alfa 10.000  
 np 48000  
 fb not used  
 bs 32 in  
 d1 2.000 dp  
 nt 16 hs  
 ct 16  
 TRANSMITTER H1 lb  
 tn H1 fn 0.20  
 sfrq 499.698 not used  
 tof 499.7 DISPLAY  
 tpwr 61 wp 4996.8  
 pw 4.950 tffl 4632.1  
 DECOUPLER C13 rfp 3627.8  
 dn 0 lp -81.2  
 dof 0  
 dm nmh -72.5  
 decwave W40\_autox7~ WC PLOT 250  
 931 SC 0  
 41 VS 72  
 32258 th 50  
 ai cdc ph

Table 4, entry 6

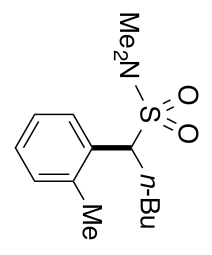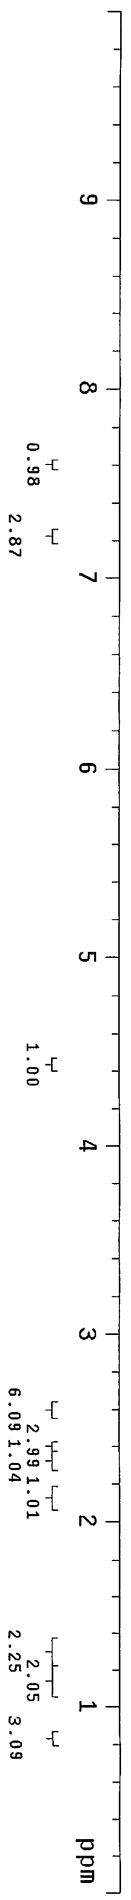

JC11021 CD2C12  
 exp30 PROTON

|                     |                |             |               |          |    |
|---------------------|----------------|-------------|---------------|----------|----|
| SAMPLE              | date           | Oct 16 2013 | PRESATURATION | satmode  | n  |
| SOIvent             | cd2c12         |             | wet           |          | n  |
| file                | /indy/jwchoi/~ |             | SPECIAL       |          |    |
| nmrsvs              | /data/JC110~   |             | temp          | not used | 28 |
| 21_CD2C12/PROTON01~ | gain           |             | sb1n          | 20       |    |
|                     | .fid           |             | hst           | 0.008    |    |
| ACQUISITION         | sw             | 8000.0      | ai            | 9.900    |    |
|                     | at             | 3.000       | alpha         | 10.000   |    |
|                     | np             | 48000       | FLAGS         |          |    |
|                     | fb             | not used    | i1            | n        |    |
|                     | bs             | 32          | in            | n        |    |
|                     | d1             | 2.000       | dp            | y        |    |
|                     | nt             | 16          | hs            | nn       |    |
| ct                  | 16             |             | PROCESSING    |          |    |
| TRANSMITTER         | H1             |             | lb            | 0.20     |    |
| tn                  | 499.699        |             | fn            | not used |    |
| sfrq                | 499.7          |             | sp            | -0.1     |    |
| tof                 | 61             |             | wp            | 4996.8   |    |
| tpwr                | 4.950          |             | rfl           | 3669.9   |    |
| pw                  | 0              |             | TFP           | 2658.4   |    |
| DECOUPLER           | C13            |             | TP            | -85.2    |    |
| dn                  | 0              |             | TP            | -72.4    |    |
| dof                 | 0              |             |               |          |    |
| dm                  | nmn            |             | WC            | 250      |    |
| decwave             | W40_autox7~    |             | SC            | 0        |    |
| dpwr                | 931            |             | VS            | 27       |    |
| dmf                 | 41             |             | th            | 50       |    |
|                     | 32258          |             | ai            | cdc      | ph |

Table 4, entry 7

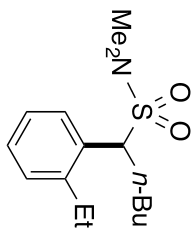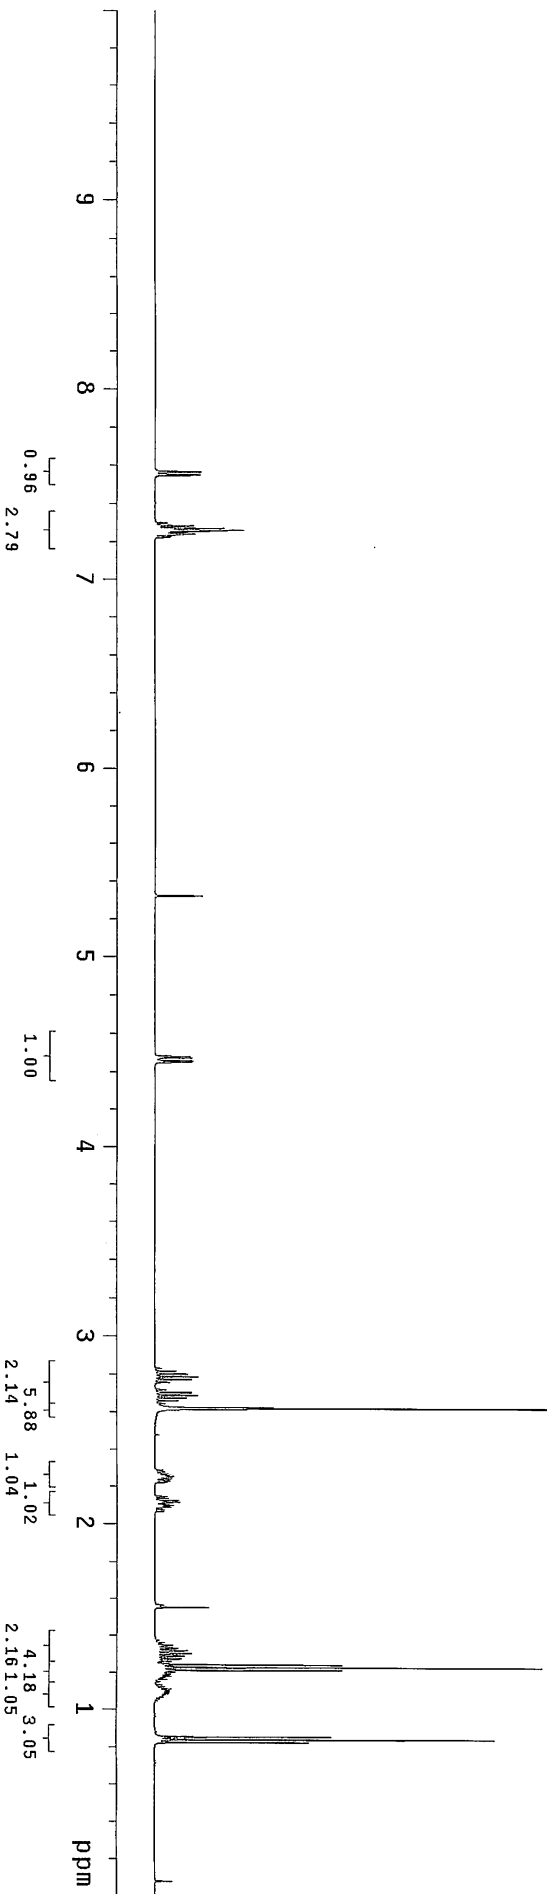

JC101438 CDC13  
 exp23 PROTON

SAMPLE PRESATURATION  
 date Jul 20 2013 satmode n  
 solvent cdcl3 wet n  
 file /indy/jwcho1/~ SPECIAL  
 vnmr\_sys/data/JC101~ temp not used  
 438\_CDC13/PROTON01~ gain 32  
 .fid hst 20  
 ACQUISITION spin 0.008  
 SW 8000.0 pw90 9.900  
 at 3.000 a1fa 10.000  
 np 48000  
 fb not used  
 bs 32 in n  
 d1 2.000 dp n  
 nt 16 hs y  
 ct 16  
 TRANSMITTER H1  
 tn 1b  
 sfra 499.698 fn not used  
 tof 499.7 SP DISPLAY  
 tpwr 61 wp 4996.8  
 pw 4.950 rfp 4632.1  
 DECOUPLER C13 rfp 3627.8  
 dn 0 tp -83.7  
 dof 1p -75.2  
 dm nm  
 dm decouple w40\_autox7~ WC PLOT 250  
 dpwr 41 vs 0  
 dmf 32258 th 60  
 ai cdc ph 50

Table 4, entry 8

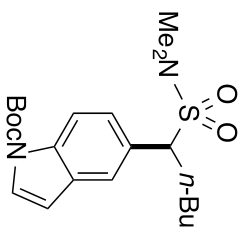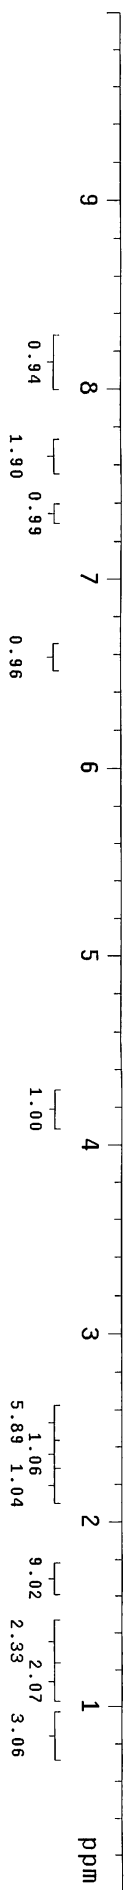



JC10219B CDC13  
 exp26 PROTON

SAMPLE PRESATURATION  
 date Aug 1 2013 satmode n  
 solvent cdc13 wet n  
 file /Indy/jwchoi/~ SPECIAL not used  
 vnmr/sys/data/JC102~ temp gain 32  
 19B\_CDC13/PROTON01~ spn 20  
 .fid hst 0.008  
 ACQUISITION pw90 9.900  
 SW 8000.0 alfa 10.000  
 AT 3.000  
 NP 48000  
 FB not used  
 BS 32  
 DI 2.000  
 NT 16  
 CT 16  
 TRANSMITTER H1  
 TN 499.698  
 SFRQ 499.7  
 TOF 61  
 TPWR 4.950  
 PW DECOUPLER C13  
 DN 0  
 DOF 0  
 DM mn  
 decwave W40\_autox7~ WC  
 dpwr 991  
 dmf 41  
 32258 th  
 at cdc ph  
 50

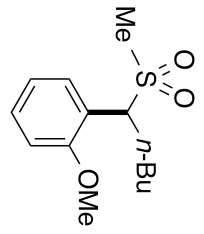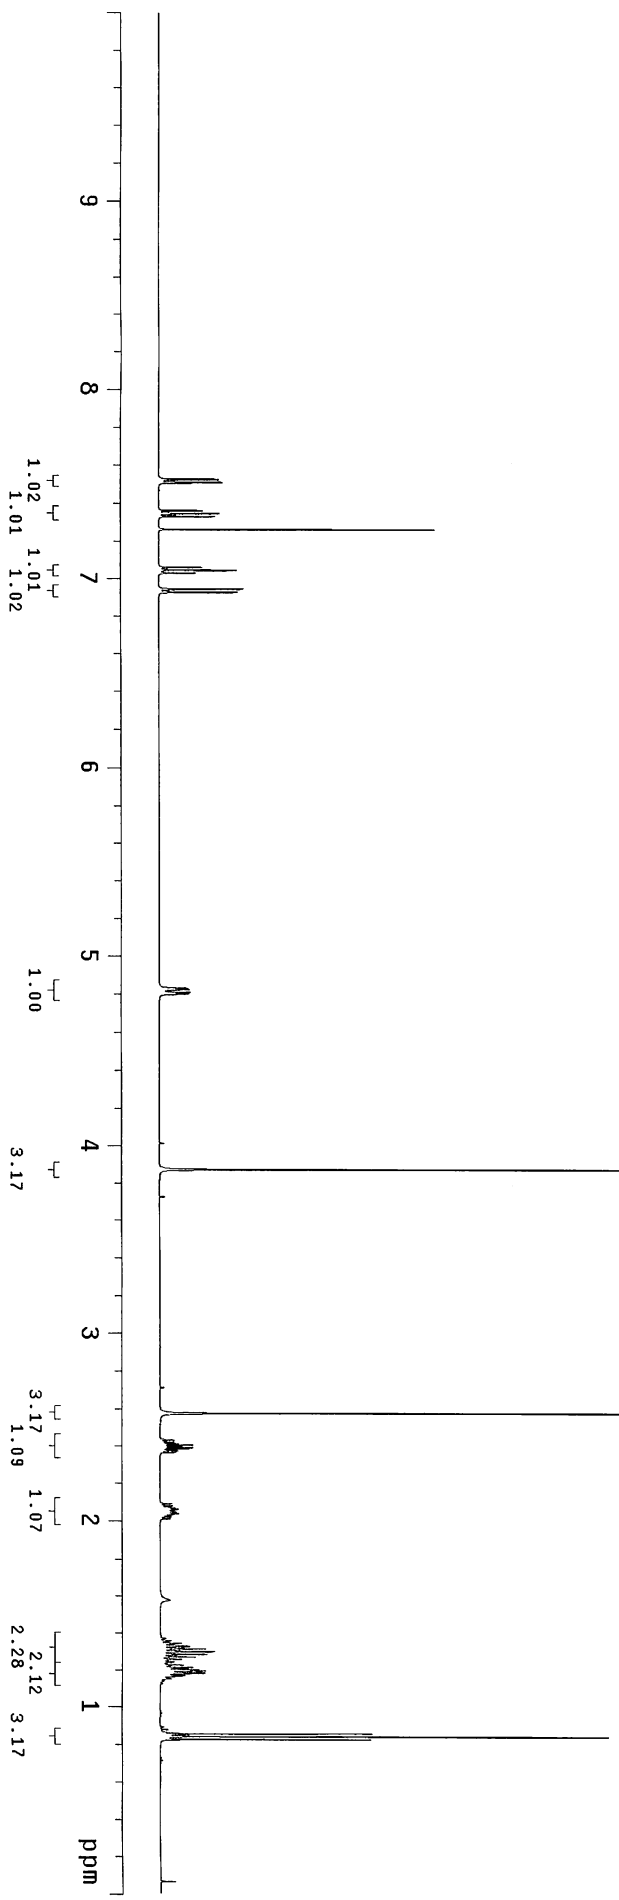

JC10215A CD2C12  
 exp34 PROTON

SAMPLE date Jul 30 2013 PRESATURATION satmode n  
 solvent CD2Cl2 wet SPECIAL n  
 file /indy/jwchoi/~ vnmr/sys/data/JC102~ temp not used 32  
 15A\_CD2C12/PROTON0~ gain 0.008 20  
 ACQUISITION 1.fid hst 9.900  
 SW 8000.0 pwr90 10.000  
 at 3.000 alfa  
 np 48000  
 fb not used  
 bs 32 in n  
 d1 2.000 dp n  
 nt 16 hs y  
 ct 16  
 TRANSMITTER H1 1b PROCESSING 0.20  
 tn H1 1b not used  
 sfrq 499.699 fn DISPLAY  
 tof 499.7 sp -0.1  
 tpwr 61 wp 4995.8  
 pw 4.950 rfp 3669.9  
 DECOUPLER C13 rfp 2658.4  
 dn 0 1p -74.6  
 dof 0 1p -73.4  
 dm nmh PLOT 250  
 decwave w40\_autox7~ wc 0  
 991 sc 0  
 41 vs 37  
 dmf 32258 th 50  
 ai cdc ph

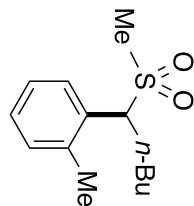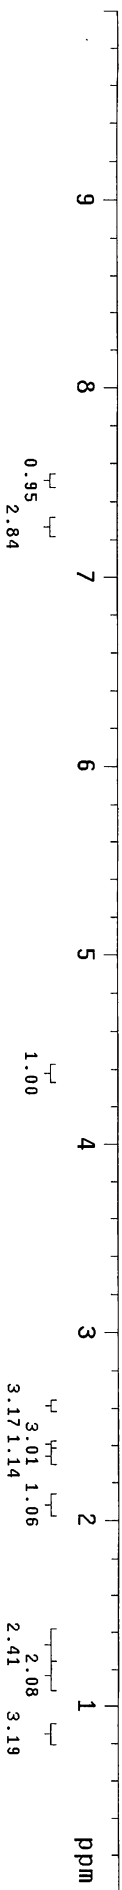

JC11023A 1H CD2C12  
exp30 PROTON

SAMPLE Oct 17 2013 PRESATURATION n  
 date Oct 17 2013 satmode n  
 solvent c6d6 wet n  
 file /indy/jwchoi/~ SPECIAL not used  
 vnmr/sys/data/JC11023A\_1H\_CD2C12/PROT1~ gain 32  
 23A\_1H\_CD2C12/PROT1~ spm 20  
 ON01.fid hst 0.008  
 ACQUISITION pw90 9.900  
 SW 8000.0 a1fa 10.000  
 at 3.000  
 np 48000  
 fb not used  
 bs 32 in  
 d1 2.000 dp  
 nt 16 hs  
 ct 16  
 TRANSMITTER 1b  
 tn H1 fn  
 sfreq 499.698 not used  
 tof 499.7 DISPLAY  
 tpwr 61 sp -0.1  
 pw 4.950 wfp 4996.8  
 dn C13 rfp 4584.5  
 dof 0 ffp 2658.4  
 dm 0 tp -86.5  
 decouple W40\_autox7~ PLOT -76.6  
 decwave W40\_autox7~ WC 250  
 931 SC 0  
 vs th 24  
 dmf 32258 50  
 at cdc ph

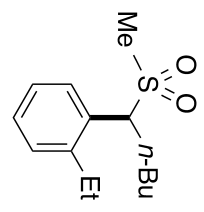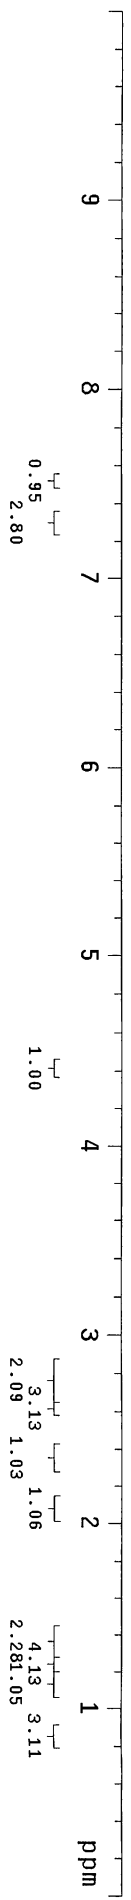

JC11079 CDC13  
 exp51 PROTON

SAMPLE Jun 5 2014 PRESATURATION n  
 solvent cdc13 satmode n  
 file /indy/jwchoi/~ cdc13 SPECIAL n  
 ynmrSYS/data/JC11079\_79\_CDC13/PROTON02.~ gain 28 not used 20  
 f1d hst 0.008  
 sp in 9.900  
 atfa 10.000  
 ACQUISITION  
 sw 8000.0 atfa 10.000  
 at 3.000  
 np 48000  
 fb not used i1 n  
 bs 32 in n  
 d1 2.000 dp y  
 nt 16 hs  
 ct 16 hs  
 TRANSMITTER 1b 0.20  
 tn H1 fn not used  
 sfrq 499.689 SP DISPLAY -0.2  
 tof 499.7 WP 4996.8  
 tpwr 61 rfp 4635.7  
 pw 4.950 rfp 3627.7  
 dn C13 TP -169.3  
 dof 0 TP -79.4  
 dm nm  
 decwave W40\_autox7~ WC PLOT 250  
 931 SC 0  
 vs VS 42  
 th th 13  
 dmf 32258  
 at cdc ph

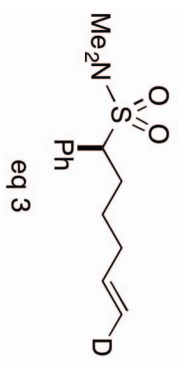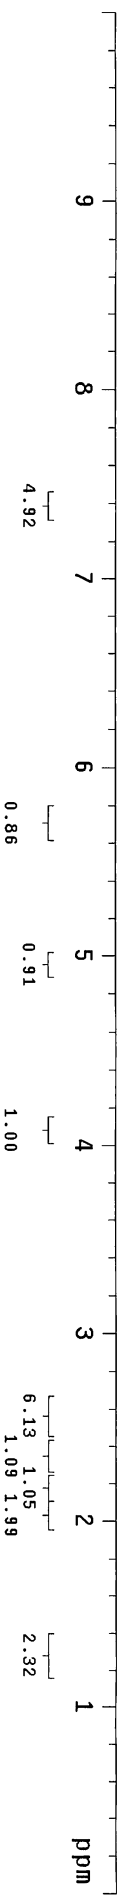

JC10045B1 CDC13

exp51 PROTON

|                     |                |               |          |
|---------------------|----------------|---------------|----------|
| SAMPLE              |                | PRESATURATION |          |
| date                | Jun 3 2014     | satmode       | n        |
| solvent             | cdcl3          | wet           | n        |
| file                | /indy/jwchoi/~ | SPECIAL       | not used |
| nmrSYS/data/JC1004  |                | temp          | 28       |
| 45B1_CDC13/PROTON0~ |                | gain          | 20       |
|                     | 1.fid          | spIn          | 0.008    |
|                     |                | hst           | 9.900    |
| ACQUISITION         |                | pw90          | 10.000   |
| sw                  | 8000.0         | at1fa         | 10.000   |
| at                  | 3.000          | al1fa         |          |
| np                  | 46000          | FLAGS         |          |
| fb                  | not used       | i1            | n        |
| bs                  | 32             | in            | n        |
| d1                  | 2.000          | dp            | Y        |
| nt                  | 16             | hs            | nh       |
| ct                  | 16             | PROCESSING    | 0.20     |
|                     |                | fn            | not used |
| tn                  | H1             | lb            | 0.20     |
| sfrq                | 499.689        | fn            | not used |
| tof                 | 499.7          | sp            | -0.2     |
| tpwr                | 61             | wp            | 4996.8   |
| pw                  | 4.950          | rft1          | 4635.3   |
|                     |                | rffp          | 3627.7   |
| dn                  | C13            | fp            | -167.5   |
| dof                 | 0              | lp            | -79.6    |
| dm                  | nmr            |               |          |
| decwave             | w40_autox7~    | WC            | 250      |
| dpwr                | 41             | SC            | 0        |
| dmf                 | 32258          | VS            | 47       |
|                     |                | th            | 25       |
|                     |                | al            | cdc ph   |

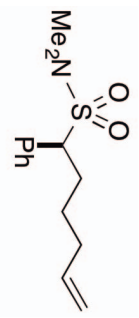

Figure 1

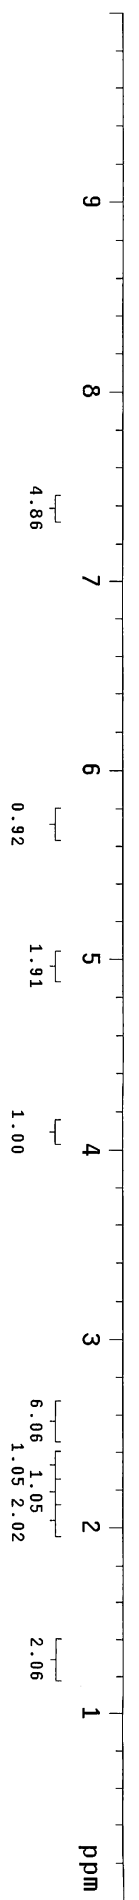

JC10187A IC-1 CD2C12

exp1 PROTON

SAMPLE PRESATURATION  
date Nov 9 2013 satmode n  
solvent cd2c12 wet n  
file /indy/jvchoi/~ SPECIAL not used  
vnmr sys/data/JC10187A\_IC-1\_CD2C12/PR~ gain 24  
OTON01.fid spin 20  
ACQUISITION hst 0.008  
pw 9.900  
sw 8000.0 a1fa 10.000  
at 3.000  
np 48000  
fb not used i1 n  
bs 32 in n  
d1 2.000 dp n  
nt 16 hs y  
ct 16 hs mn  
tn TRANSMITTER 1b 0.20  
fn not used  
sfrq 499.699 DISPLAY  
tof 499.7 sp -0.1  
tpwr 61 wd 4996.8  
pw 4.950 rfp 3669.7  
dn DECOUPLER C13 rfp 2658.4  
dof 0 rfp -70.6  
dm 0 1p -73.6  
decwave w40\_autox7~ PLOT 250  
vs 991 wc 0  
th 41 vs 19  
dmf 32258 th 6  
at cdic ph

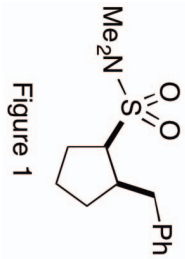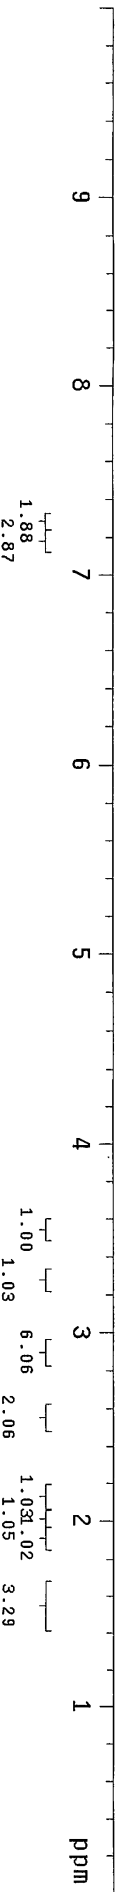

JC10187A IA-1 CD2C12

exp1 PROTON

SAMPLE PRESATURATION  
 date Nov 10 2013 satmode n  
 solvent cd2c12 wet n  
 file /indy/jwchoi/~ SPECIAL not used  
 vnmr sys/data/JC10187A IA-1\_CD2C12/PR~ ga1n 24  
 87A IA-1\_CD2C12/PR~ sp1n 20  
 OTON01.fid hst 0.008  
 ACQUISITION pw90 9.900  
 SW 8000.0 atfa 10.000  
 at 3.000  
 np 48000  
 fb not used  
 bs 32 in n  
 d1 2.000 dp n  
 nt 16 hs Y  
 ct 16  
 PROCESSING  
 tn 1b 0.20  
 TRANSMITTER H1 fn not used  
 sfreq 499.699 DISPLAY -0.1  
 tof 499.7 sp 4996.8  
 tpwr 61 wp 3670.2  
 pw 4.950 ffp 2658.4  
 DECOUPLER C13 ffp -66.3  
 dn 0 1p -80.4  
 dof 0  
 dm nm  
 decouple w40\_autox7~ WC PLOT 250  
 991 SC 0  
 41 VS 26  
 32258 th 6  
 at cdc ph

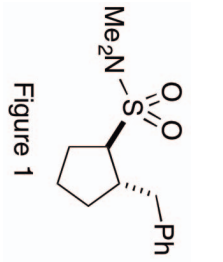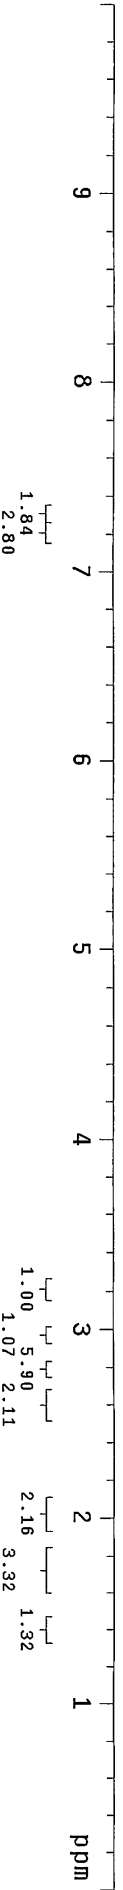

JC12075B CDCl3

exp64 PROTON

SAMPLE PRESATURATION  
date Aug 1 2014 satmode n  
solvent cdcl3 wet n  
file /indy/jwchoi/~ SPECIAL  
vnmrsvs/data/JC120~ temp 25.0  
75B\_CDCl3/PROTON01~ gain 28  
.fid spin 20  
ACQUISITION hst 0.008  
sw 8000.0 pw90 9.900  
at 3.000 alfa 10.000  
np 48000 FLAGS  
fb not used i1 n  
bs 32 in n  
d1 2.000 dp y  
nt 16 hs nm  
ct 16 PROCESSING  
TRANSMITTER lb 0.20  
tn H1 fn not used  
sfrq 499.689 DISPLAY  
tof 499.7 sp -0.2  
tpwr 61 wp 4996.8  
pw 4.950 rfl 4635.7  
DECOUPLER rfp 3627.7  
dn C13 ip -173.5  
dof 0 lp -68.6  
dm nnn PLOT  
decwawe W40\_autocx7~ wc 234  
991 sc 8  
dpwr 41 vs 35  
dmtf 32258 th 11  
ai cdc ph

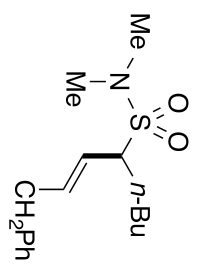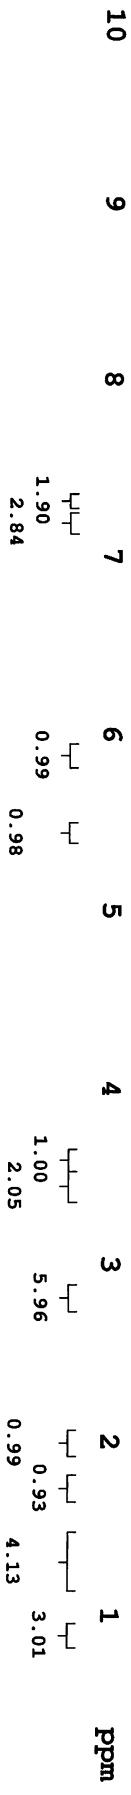



JC10275 CD2C12  
exp30 PROTON

|                    |                |        |          |            |          |
|--------------------|----------------|--------|----------|------------|----------|
| date               | Sep 5 2013     | SAMPLE | CD2C12   | satmode    | n        |
| solvent            | /indy/jwcho1/~ | file   | cd2c12   | wet        | n        |
| nmr/sys            | /data/JC10275  | temp   | 28       | SPECIAL    | not used |
| 75_CD2C12/PROTON01 |                | gain   | 20       |            |          |
|                    |                | spin   | 20       |            |          |
| ACQUISITION        | .fid           | hst    | 0.008    |            |          |
| sw                 | 8000.0         | pw90   | 9.900    |            |          |
| at                 | 3.000          | alfta  | 10.000   | FLAGS      |          |
| np                 | 48000          |        |          |            |          |
| fb                 | not used       | fl     |          |            |          |
| bs                 | 32             | in     |          |            |          |
| d1                 | 2.000          | dp     |          |            |          |
| nt                 | 16             | hs     |          |            |          |
| ct                 | 16             | hs     |          |            |          |
| TRANSMITTER        | H1             | tb     | 0.20     | PROCESSING |          |
| tn                 | 499.699        | fn     | not used |            |          |
| sfrq               | 499.7          | sp     | -0.1     | DISPLAY    |          |
| tof                | 61             | wp     | 4996.8   |            |          |
| tpwr               | 4.950          | fft    | 3669.9   |            |          |
| pw                 | 4.950          | ffp    | 2658.4   |            |          |
| DECOUPLER          | C13            | rfp    | -71.9    |            |          |
| dn                 | 0              | tp     | -76.8    | PLOT       |          |
| dof                | 0              |        |          |            |          |
| dm                 | nmn            |        |          |            |          |
| decwave            | W40_autox7~    | wc     | 250      |            |          |
| dpwr               | 41             | vs     | 131      |            |          |
| dmf                | 32258          | th     | 50       |            |          |
|                    |                | at     | cdc      | ph         |          |

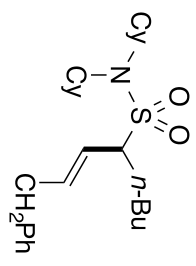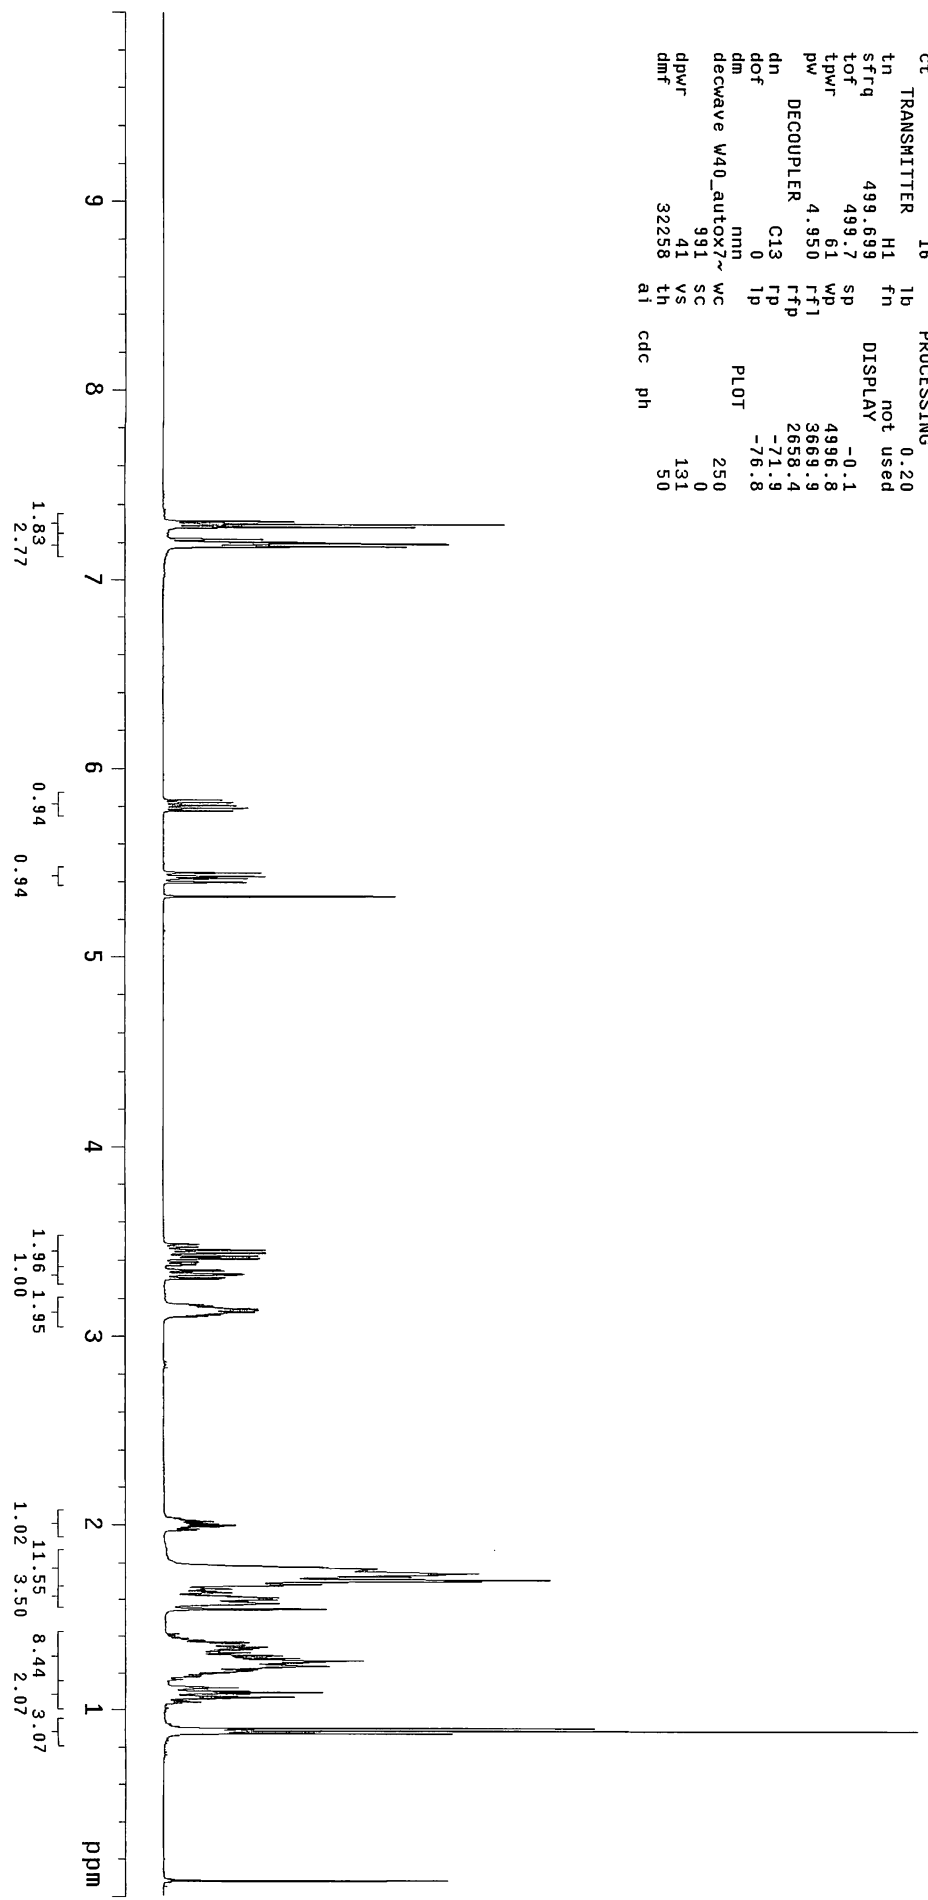

JC11025A 1H CDC13

expt1 PROTON

|                     |                 |               |          |
|---------------------|-----------------|---------------|----------|
| date                | Oct 23 2013     | PRESATURATION |          |
| solvent             | cdcl3           | satmode       | n        |
| file                | /indy/jwcho1/~  | wet           | n        |
| nmr                 | sys/data/JC110~ | SPECIAL       | not used |
| 25A_1H_CDC13/PROT0~ |                 | gain          | 26       |
|                     |                 | spn           | 20       |
|                     |                 | hst           | 0.008    |
|                     |                 | pw30          | 9.900    |
| ACQUISITION         |                 | atfta         | 10.000   |
| sw                  | 8000.0          | flags         |          |
| at                  | 3.000           |               |          |
| np                  | 48000           |               |          |
| fb                  | not used        |               |          |
| bs                  | 32              |               |          |
| d1                  | 2.000           |               |          |
| nt                  | 16              |               |          |
| ct                  | 16              |               |          |
| TRANSMITTER         |                 | PROCESSING    |          |
| tn                  | H1              | fb            | 0.20     |
| sftq                | 499.698         | fn            | not used |
| tof                 | 499.7           | sp            | -0.1     |
| tpwr                | 61              | wp            | 4996.8   |
| pw                  | 4.950           | rf1           | 4632.1   |
| DECOUPLER           |                 | rfp           | 3627.8   |
| dn                  | C13             | fp            | -87.5    |
| dof                 | 0               | tp            | -72.5    |
| dm                  | nmn             |               |          |
| decwave             | w40_autox7~     | WC            | 250      |
| dpwr                | 991             | SC            | 0        |
| dmf                 | 41              | VS            | 37       |
|                     | 32258           | th            | 13       |
|                     |                 | ai            | cdc ph   |

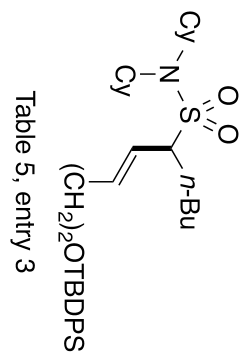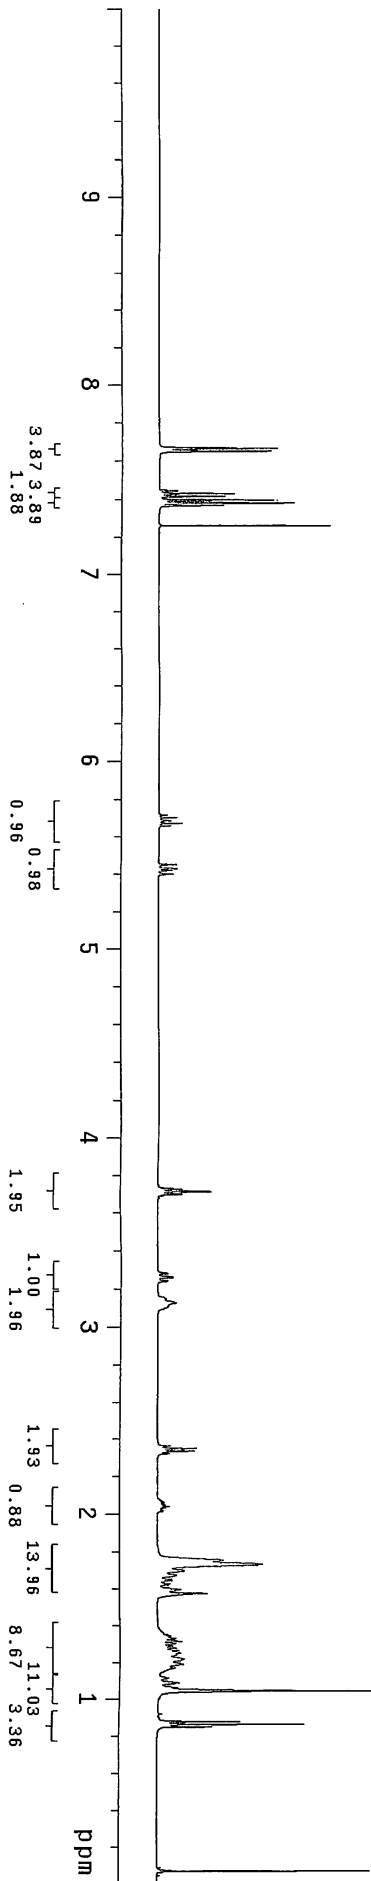

JC10279A CD2C12

exp30 PROTON

|             |                     |                 |               |          |          |
|-------------|---------------------|-----------------|---------------|----------|----------|
| SAMPLE      | date                | Sep 16 2013     | PRESATURATION | satmode  | n        |
| SOVENT      | solvent             | cd2c12          | satmode       | not used | n        |
| FILE        | file                | /indy/jwchoi/~  | SPECIAL       | not used | n        |
| VMR         | vmr                 | sys/data/JC102~ | temp          | 24       | 24       |
| 79A         | 79A_CD2C12/PROTON0~ | 1.fid           | gain          | 20       | 20       |
| ACQUISITION | sw                  | 8000.0          | hst           | 0.008    | 0.008    |
| at          | at                  | 3.000           | pw90          | 9.900    | 9.900    |
| np          | np                  | 48000           | ai            | 10.000   | 10.000   |
| fb          | fb                  | not used        | alpha         |          |          |
| bs          | bs                  | not used        | flags         |          |          |
| d1          | d1                  | 2.000           | i1            | n        | n        |
| nt          | nt                  | 16              | in            | n        | n        |
| ct          | ct                  | 16              | dp            | y        | y        |
| TRANSMITTER | td                  | hs              | hs            | nn       | nn       |
| tn          | tn                  | 1d              | PROCESSING    | 0.20     | 0.20     |
| sfrq        | sfrq                | 499.699         | fn            | not used | not used |
| tof         | tof                 | 499.7           | DISPLAY       |          |          |
| tpwr        | tpwr                | 61              | WD            | -0.1     | 4996.8   |
| pw          | pw                  | 4.950           | TF1           | 3669.9   | 3669.9   |
| DECOUPLER   | C13                 | 0               | TFP           | 2658.4   | 2658.4   |
| dn          | dn                  | 0               | TP            | -68.2    | -68.2    |
| dof         | dof                 | 0               | TP            | -78.6    | -78.6    |
| dm          | dm                  | nm              | WC            |          |          |
| deccave     | deccave             | w40_autox7~     | WC            |          |          |
| dpr         | dpr                 | 931             | SC            |          |          |
| dmf         | dmf                 | 41              | VS            |          |          |
|             |                     | 32258           | TH            |          |          |
|             |                     |                 | AI            |          |          |
|             |                     |                 | cdc           |          |          |
|             |                     |                 | ph            |          |          |

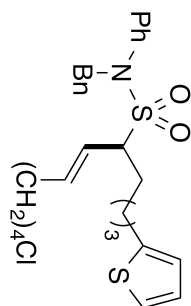

Table 5, entry 4

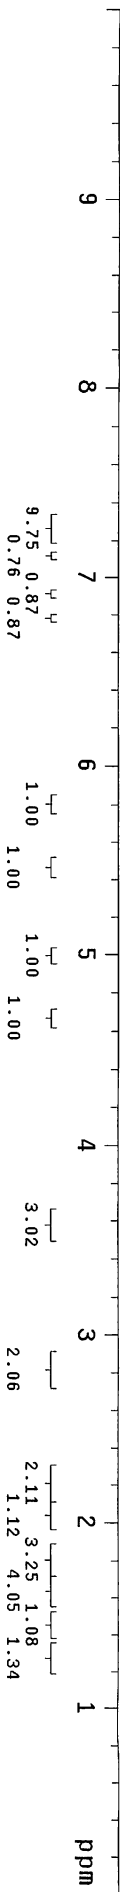

JC10281A 1H CDC13  
exp2 PROTON

SAMPLE Nov 2 2013 PRESATURATION  
 solvent cdc13 satmode n  
 file /indy/jwchoi/~ cdc13 wet n  
 vnmr sys/data/JC102~ temp SPECIAL not used  
 81A\_1H\_CDC13/PRO10~ gain 24  
 N01.fid spm 20  
 hst 0.008  
 pw90 9.900  
 ACQUISITION 8000.0 atfa 10.000  
 sw 3.000  
 at 46000  
 np 46000  
 fb not used  
 bs 32  
 di 2.000  
 nt 16  
 ct 16  
 TRANSMITTER H1  
 tn H1  
 sfrq 499.698  
 tof 499.7  
 tpwr 61  
 pw 4.950  
 DECOUPLER C13  
 dn C13  
 dof 0  
 dm nnn  
 decouple w40\_autocx7~ WC  
 dpwr 41  
 dmf 32258  
 th 50  
 at cdc ph  
 PLOT 250  
 103  
 50  
 PROCESSING 0.20  
 fn not used  
 DISPLAY  
 -0.1  
 4996.8  
 4632.1  
 3627.8  
 -79.0  
 -77.6

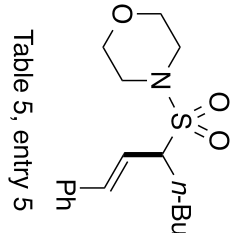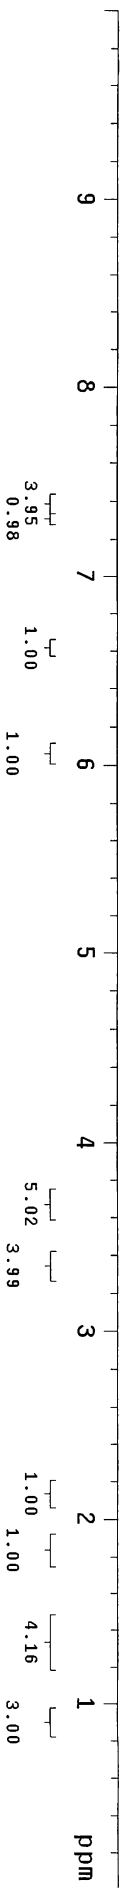

JC11123 CDC13  
exp37 PROTON

|          |                     |             |            |          |
|----------|---------------------|-------------|------------|----------|
| date     | Feb 5 2014          | SAMPLE      | satmode    | n        |
| solvent  | cdc13               | PROTON      | satmode    | n        |
| file     | /indy/jwchoi/~      |             | SPECIAL    | not used |
| nmr      | 23_CDC13/PROTON02.~ |             | temp       | 26       |
| fid      |                     |             | gain       | 20       |
| sw       | 8000.0              | ACQUISITION | hst        | 0.008    |
| at       | 3.000               |             | spn        | 9.900    |
| np       | 48000               |             | atfa       | 10.000   |
| fb       | not used            |             | FLAGS      |          |
| bs       | 32                  |             | i1         | n        |
| d1       | 2.000               |             | in         | n        |
| nt       | 16                  |             | dp         | y        |
| ct       | 16                  |             | hs         | mn       |
| tn       | TRANSMITTER         |             | PROCESSING | 0.20     |
| sfrq     | 499.698             |             | fn         | not used |
| tof      | 499.7               |             | DISPLAY    |          |
| tpwr     | 4.950               |             | wp         | -0.1     |
| pw       | 4.950               |             | ftf1       | 4996.8   |
| dn       | 0                   |             | ftf2       | 4632.1   |
| dof      | 0                   |             | ftf3       | 3627.8   |
| dm       | nmr                 |             | tp         | -77.7    |
| decouple | W40_autox7~         |             | WC         | 250      |
| dmf      | 32258               |             | SC         | 0        |
|          |                     |             | VS         | 41       |
|          |                     |             | TH         | 13       |
|          |                     |             | AI         | cdc ph   |

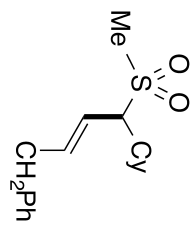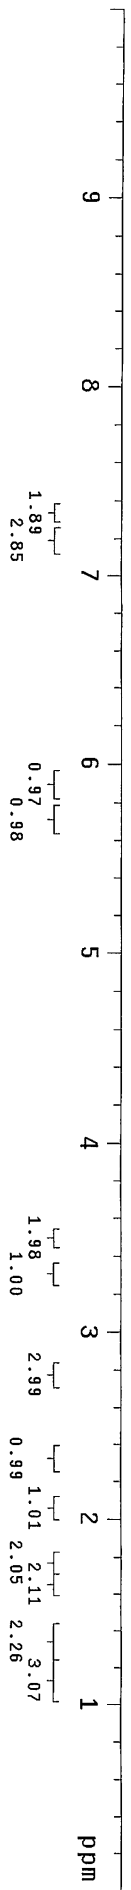

# VII. HPLC Data

Data File C:\HPCHEM\1\DATA\201212-1\JC9121A.D

Sample Name: JC9121A

```

=====
Injection Date : 12/18/2012 2:33:11 PM      Seq. Line : 1
Sample Name    : JC9121A                    Location  : Vial 4
Acq. Operator  : CE                          Inj       : 1
Acq. Instrument : Instrument 1                Inj Volume: 15 µl
Different Inj Volume from Sequence 1         Actual Inj Volume : 5 µl
Acq. Method    : C:\HPCHEM\1\METHODS\VD-01-40.M
Last changed   : 12/18/2012 2:48:17 PM by CE
                (modified after loading)
Analysis Method : C:\HPCHEM\1\METHODS\VD-02-20.M
Last changed   : 7/30/2014 4:56:50 PM by MK
                (modified after loading)
=====
    
```

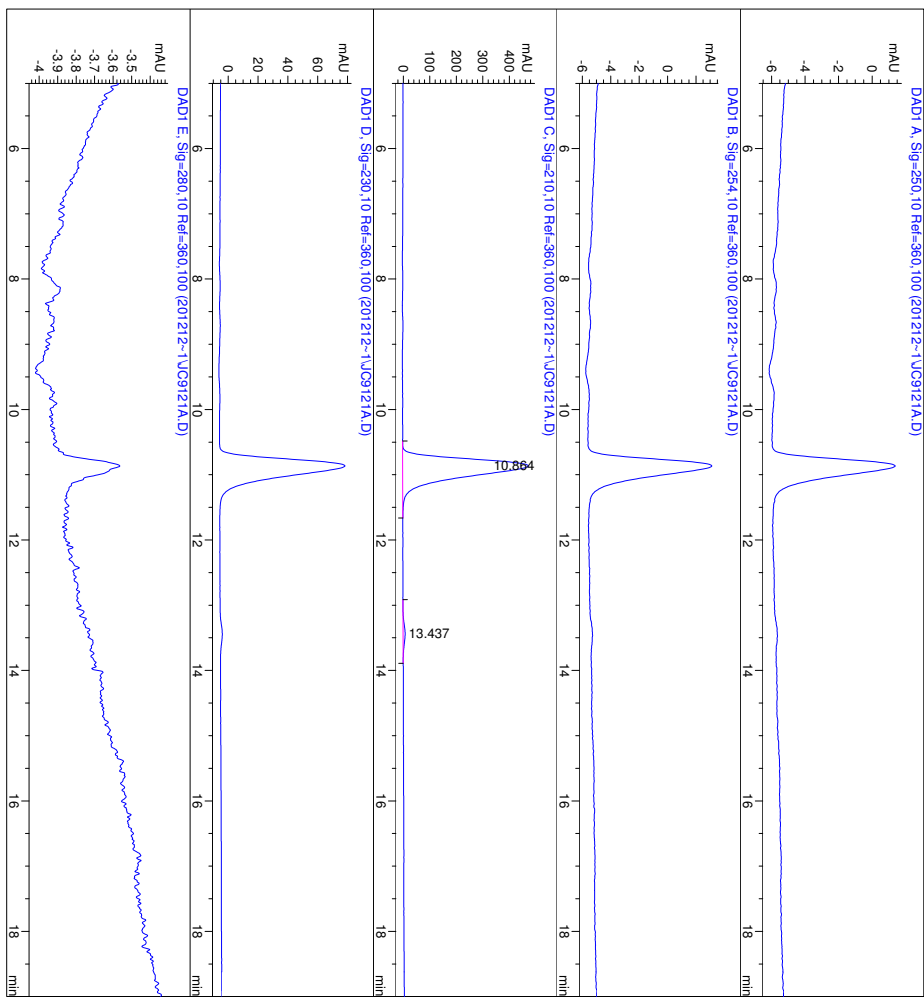

Data File C:\HPCHEM\1\DATA\201212-1\JC9121A.D

Sample Name: JC9121A

```

=====
Area Percent Report
=====
Sorted By      : Signal
Multiplier    : 1.0000
Dilution      : 1.0000
Use Multiplier & Dilution Factor with ISTDs
    
```

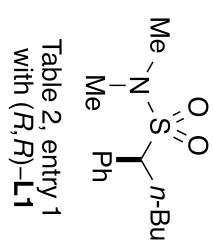

Table 2, entry 1  
with (R,R)-L1

| Signal                                   | Retention Time (min) | Type | Width (min) | Area (mAU*s) | Height (mAU) | Area %  |
|------------------------------------------|----------------------|------|-------------|--------------|--------------|---------|
| Signal 3: DAD1 C, Sig=210,10 Ref=360,100 | 10.864               | BB   | 0.2815      | 8588.73828   | 473.84717    | 98.0169 |
| Signal 2: DAD1 B, Sig=254,10 Ref=360,100 | 13.437               | PV   | 0.2756      | 173.77281    | 7.93276      | 1.9831  |

Totals : 8762.51109 481.77993

Results obtained with enhanced integrator!

Signal 4: DAD1 D, Sig=230,10 Ref=360,100

Signal 5: DAD1 E, Sig=280,10 Ref=360,100

\*\*\* End of Report \*\*\*

Injection Date : 12/18/2012 3:04:38 PM  
 Sample Name : JC9121B  
 Acq. Operator : CE  
 Acq. Instrument : Instrument 1  
 Different Inj Volume from Sequence : Inj Volume : 15 µl  
 Actual Inj Volume : 5 µl  
 Last changed : 4/7/2011 2:40:51 AM by CC  
 Analysis Method : C:\HPCHEM\1\METHODS\AD005-40.M  
 Last changed : 8/2/2014 8:33:12 PM by MK  
 (modified after loading)

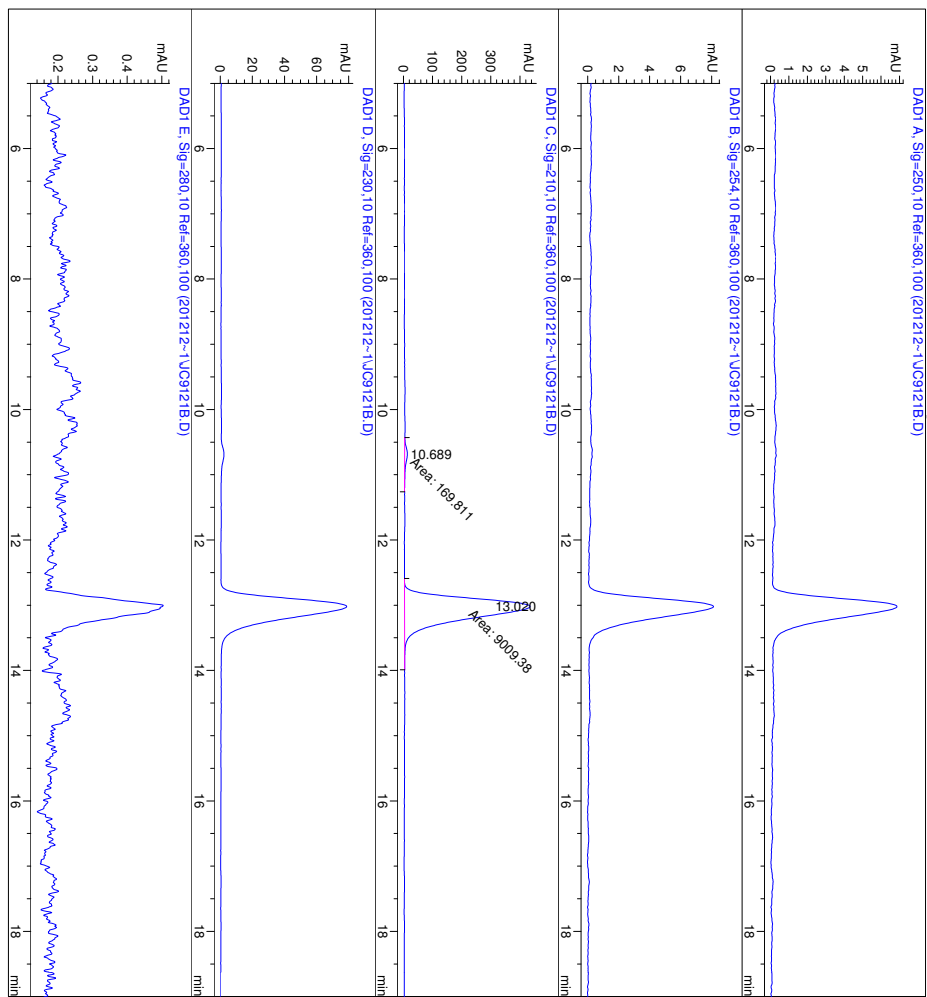

Area Percent Report  
 Sorted By : Signal  
 Multiplier : 1.0000  
 Dilution : 1.0000  
 Use Multiplier & Dilution Factor with ISTDs

Signal 1: DAD1 A, Sig=250,10 Ref=360,100

Signal 2: DAD1 B, Sig=254,10 Ref=360,100

Signal 3: DAD1 C, Sig=210,10 Ref=360,100

| Peak # | RetTime [min] | Type | Width [min] | Area [mAU*s] | Height [mAU] | Area %  |
|--------|---------------|------|-------------|--------------|--------------|---------|
| 1      | 10.689        | FM   | 0.2978      | 169.81142    | 9.50396      | 1.8500  |
| 2      | 13.020        | MM   | 0.3481      | 9009.37891   | 431.37000    | 98.1500 |

Totals : 9179.19032 440.87395

Results obtained with enhanced integrator!

Signal 4: DAD1 D, Sig=230,10 Ref=360,100

Signal 5: DAD1 E, Sig=280,10 Ref=360,100

\*\*\* End of Report \*\*\*

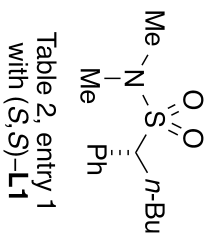

=====  
 Injection Date : 1/13/2013 11:37:20 PM      Seq. Line : 2  
 Sample Name : JC9153A                            Location : Vial 3  
 Acq. Operator : CE                                Inj : 1  
 Acq. Instrument : Instrument 1                    Inj Volume : 15 µl  
 Different Inj Volume from Sequence 1            Actual Inj Volume : 3 µl  
 Acq. Method : C:\HPCHEM\1\METHODS\OD-02-40.M  
 Last changed : 8/9/2012 4:54:01 PM by CE  
 Analysis Method : C:\HPCHEM\1\METHODS\OD-02-20.M  
 Last changed : 7/30/2014 4:55:19 PM by MK  
 (modified after loading)

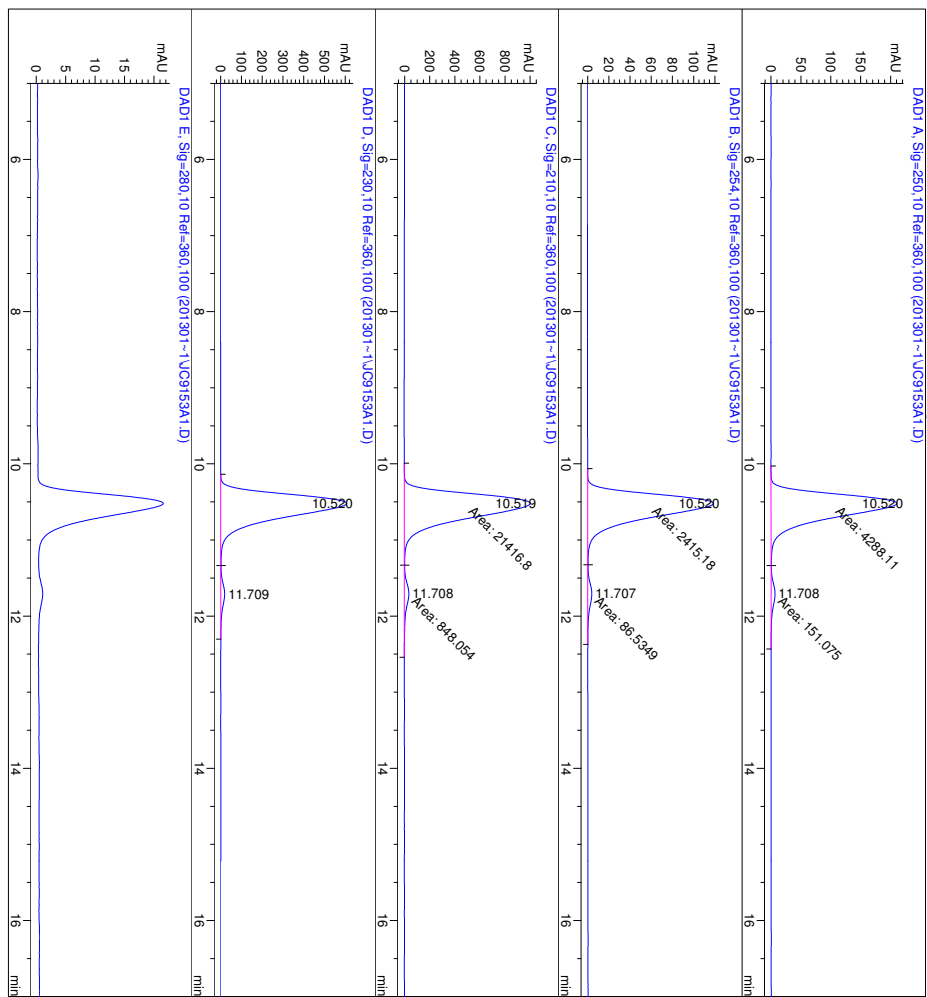

=====  
 Area Percent Report  
 Sorted By : Signal  
 Multiplier : 1.0000  
 Dilution : 1.0000  
 Use Multiplier & Dilution Factor with ISTDs

Signal 1: DAD1 A, Sig=250,10 Ref=360,100

| Peak #   | RetTime [min] | Type | Width [min] | Area [mAU*s] | Height [mAU] | Area %  |
|----------|---------------|------|-------------|--------------|--------------|---------|
| 1        | 10.520        | MF   | 0.3390      | 4288.11475   | 210.79234    | 96.5968 |
| 2        | 11.708        | FM   | 0.3773      | 151.07475    | 6.67396      | 3.4032  |
| Totals : |               |      |             | 4439.18950   | 217.46631    |         |

Signal 2: DAD1 B, Sig=254,10 Ref=360,100

| Peak #   | RetTime [min] | Type | Width [min] | Area [mAU*s] | Height [mAU] | Area %  |
|----------|---------------|------|-------------|--------------|--------------|---------|
| 1        | 10.520        | MF   | 0.3389      | 2415.18042   | 118.77131    | 96.5410 |
| 2        | 11.707        | FM   | 0.3774      | 86.53488     | 3.82184      | 3.4590  |
| Totals : |               |      |             | 2501.71530   | 122.59315    |         |

Signal 3: DAD1 C, Sig=210,10 Ref=360,100

| Peak #   | RetTime [min] | Type | Width [min] | Area [mAU*s] | Height [mAU] | Area %  |
|----------|---------------|------|-------------|--------------|--------------|---------|
| 1        | 10.519        | MF   | 0.3557      | 21416.8e4    | 1003.47882   | 96.1911 |
| 2        | 11.708        | FM   | 0.3883      | 848.05426    | 36.40364     | 3.8089  |
| Totals : |               |      |             | 2.22649e4    | 1039.88247   |         |

Signal 4: DAD1 D, Sig=230,10 Ref=360,100

| Peak #   | RetTime [min] | Type | Width [min] | Area [mAU*s] | Height [mAU] | Area %  |
|----------|---------------|------|-------------|--------------|--------------|---------|
| 1        | 10.520        | BB   | 0.3125      | 1.22823e4    | 606.00146    | 96.7746 |
| 2        | 11.709        | BB   | 0.3369      | 409.36346    | 18.58926     | 3.2254  |
| Totals : |               |      |             | 1.26917e4    | 624.59073    |         |

Results obtained with enhanced integrator!  
 Signal 5: DAD1 E, Sig=280,10 Ref=360,100  
 Results obtained with enhanced integrator!  
 \*\*\* End of Report \*\*\*

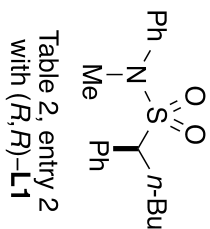



=====  
Injection Date : 1/13/2013 9:26:32 PM      Seq. Line : 3  
Sample Name : JC9153B                              Location : Vial 4  
Acq. Operator : CE                                    Inj : 1  
Acq. Instrument : Instrument 1                    Inj Volume : 15 µl  
Diluent Inj Volume from Sequence 1            Actual Inj Volume : 3 µl  
Acq. Method : C:\HPCHEM\1\METHODS\OD-02-30.M  
Last changed : 4/19/2010 4:08:56 PM by sz  
Analysis Method : C:\HPCHEM\1\METHODS\AD003-40.M  
Last changed : 8/1/2014 11:08:32 PM by MK  
(modified after loading)

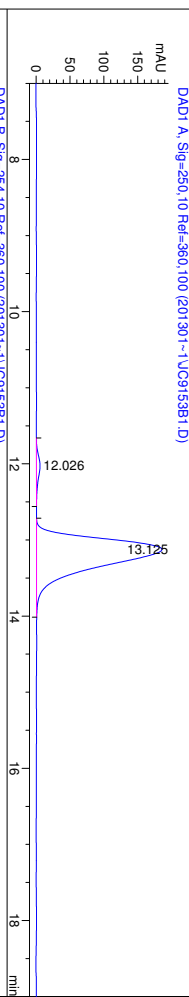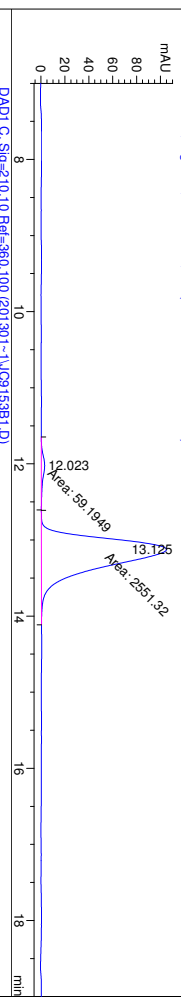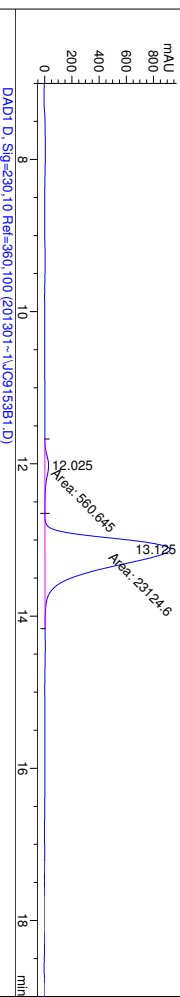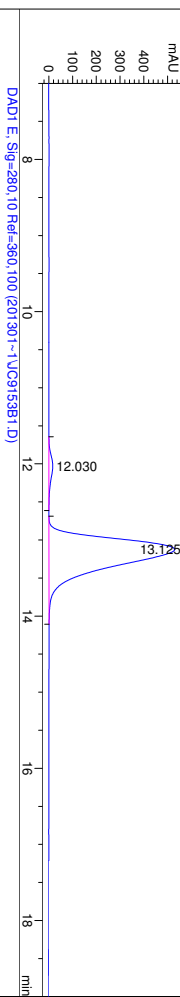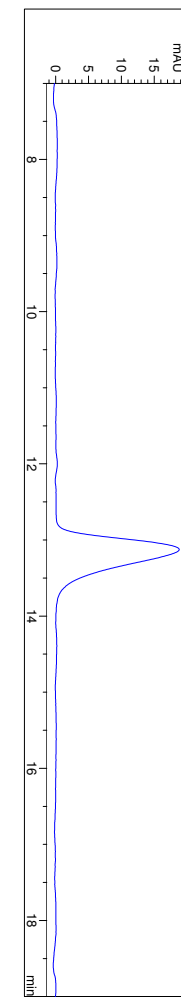

=====  
Area Percent Report  
=====

| Sorted By                                   | Signal |
|---------------------------------------------|--------|
| Multiplier                                  | 1.0000 |
| Dilution                                    | 1.0000 |
| Use Multiplier & Dilution Factor with ISTDs |        |

Signal 1: DADI A, Sig=250,10 Ref=360,100  
Results obtained with enhanced integrator!

| Peak # | RetTime [min] | Type | Width [min] | Area [mAU*s] | Height [mAU] | Area %  |
|--------|---------------|------|-------------|--------------|--------------|---------|
| 1      | 12.026        | BP   | 0.3146      | 113.62238    | 5.33121      | 2.4632  |
| 2      | 13.125        | BB   | 0.3752      | 4499.24658   | 185.38203    | 97.5368 |

Totals : 4612.86896 190.71324

Signal 2: DADI B, Sig=254,10 Ref=360,100  
Results obtained with enhanced integrator!

| Peak # | RetTime [min] | Type | Width [min] | Area [mAU*s] | Height [mAU] | Area %  |
|--------|---------------|------|-------------|--------------|--------------|---------|
| 1      | 12.023        | MM   | 0.3532      | 59.19486     | 2.79296      | 2.2676  |
| 2      | 13.125        | MM   | 0.4060      | 2551.31982   | 104.72879    | 97.7324 |

Totals : 2610.51468 107.52175

Signal 3: DADI C, Sig=210,10 Ref=360,100  
Results obtained with enhanced integrator!

| Peak # | RetTime [min] | Type | Width [min] | Area [mAU*s] | Height [mAU] | Area %  |
|--------|---------------|------|-------------|--------------|--------------|---------|
| 1      | 12.025        | MM   | 0.3401      | 560.64459    | 27.47764     | 2.3671  |
| 2      | 13.125        | MM   | 0.4189      | 23124.6      | 919.98969    | 97.6329 |

Totals : 2.36852e4 947.46732

Signal 4: DADI D, Sig=230,10 Ref=360,100  
Results obtained with enhanced integrator!

| Peak # | RetTime [min] | Type | Width [min] | Area [mAU*s] | Height [mAU] | Area %  |
|--------|---------------|------|-------------|--------------|--------------|---------|
| 1      | 12.030        | BP   | 0.3344      | 358.89542    | 16.20137     | 2.7223  |
| 2      | 13.125        | BB   | 0.3746      | 12824.7      | 529.39978    | 97.2777 |

Totals : 1.31836e4 545.60115

Signal 5: DADI E, Sig=280,10 Ref=360,100  
Results obtained with enhanced integrator!

\*\*\* End of Report \*\*\*

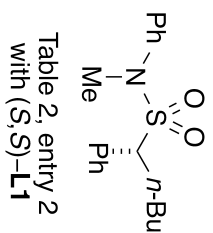

=====  
 Injection Date : 1/5/2013 12:33:05 AM      Seq. Line : 6  
 Sample Name : JC9149A                              Location : Vial 6  
 Acq. Operator : CE                                    Inj : 1  
 Acq. Instrument : Instrument 1                    Inj Volume : 15 µl  
 Different Inj Volume from Sequence !          Actual Inj Volume : 5 µl  
 Last changed : 1/4/2013 10:05:27 PM by CE  
 Analysis Method : C:\HPCHEM\1\METHODS\AD-02-40.M  
 Last changed : 7/30/2014 4:58:11 PM by MK  
 (modified after loading)

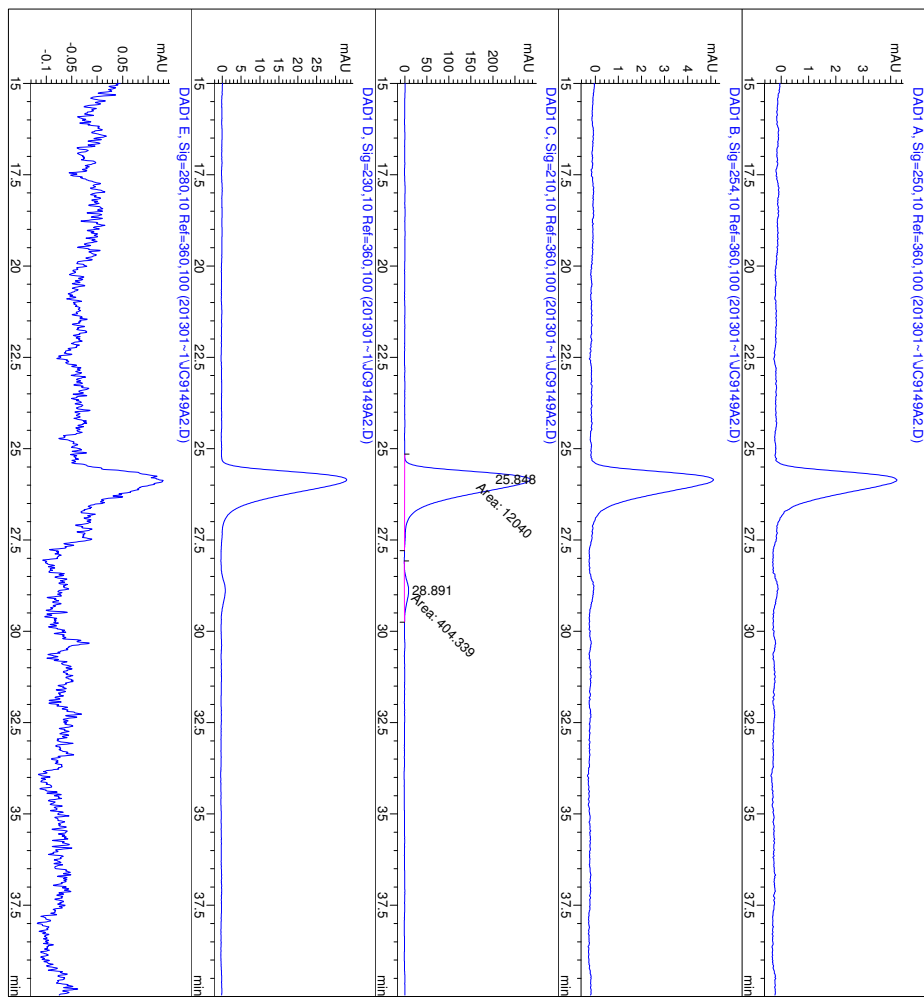

=====  
 Area Percent Report  
 =====  
 Sorted By : Signal  
 Multiplier : 1.0000  
 Dilution : 1.0000  
 Use Multiplier & Dilution Factor with ISTDs

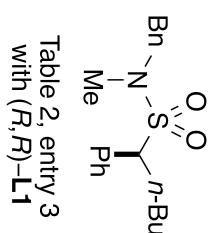

| Signal                                   | RetTime [min] | Type | Width [min] | Area [mAU*s] | Height [mAU] | Area %  |
|------------------------------------------|---------------|------|-------------|--------------|--------------|---------|
| Signal 3: DAD1 C, Sig=210,10 Ref=360,100 | 25.848        | MM   | 0.7041      | 1.20400e4    | 285.00970    | 96.7508 |
| Signal 4: DAD1 D, Sig=230,10 Ref=360,100 | 28.891        | MM   | 0.7018      | 404.33865    | 9.60306      | 3.2492  |

Totals : 1.24443e4 294.61277  
 Results obtained with enhanced integrator!  
 Signal 4: DAD1 D, Sig=230,10 Ref=360,100  
 Signal 5: DAD1 E, Sig=280,10 Ref=360,100

\*\*\* End of Report \*\*\*

=====  
 Injection Date : 1/5/2013 1:14:21 AM      Seq. Line : 7  
 Sample Name : JC9149B                      Location : Vial 7  
 Acq. Operator : CE                            Inj : 1  
 Acq. Instrument : Instrument 1              Inj Volume : 15 µl  
 Different Inj Volume from Sequence !      Actual Inj Volume : 5 µl  
 Last changed : 1/4/2013 10:05:27 PM by CE  
 Analysis Method : C:\HPCHEM\1\METHODS\AD-02-40.M  
 Last changed : 8/1/2014 11:12:30 PM by MK  
 Last changed : 8/1/2014 11:12:30 PM by MK  
 (modified after loading)

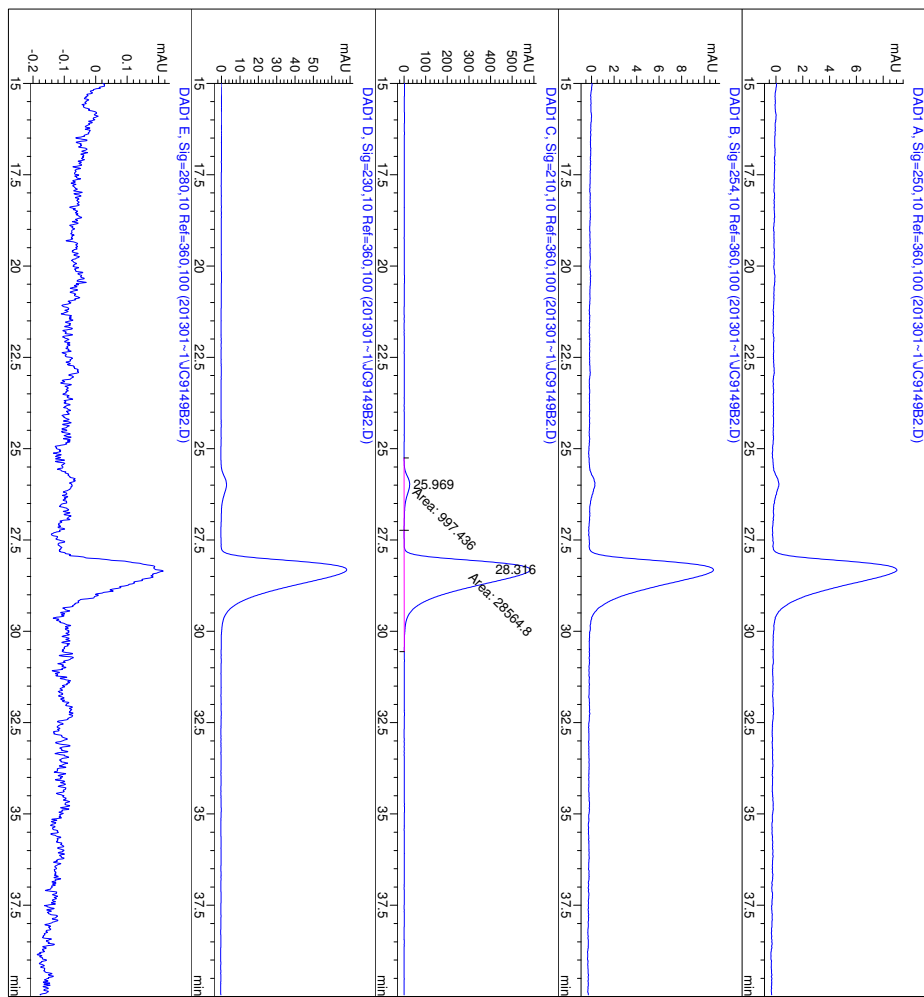

=====  
 Area Percent Report  
 =====

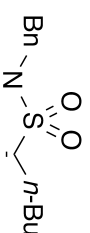

Table 2, entry 3  
 with (S,S)-L1

| Sorted By                                   | Signal                         |      |             |              |              |         |
|---------------------------------------------|--------------------------------|------|-------------|--------------|--------------|---------|
| Multiplier                                  | : 1.0000                       |      |             |              |              |         |
| Dilution                                    | : 1.0000                       |      |             |              |              |         |
| Use Multiplier & Dilution Factor with ISTDs |                                |      |             |              |              |         |
| Signal 1:                                   | DAD1 A, Sig=250,10 Ref=360,100 |      |             |              |              |         |
| Signal 2:                                   | DAD1 B, Sig=254,10 Ref=360,100 |      |             |              |              |         |
| Signal 3:                                   | DAD1 C, Sig=210,10 Ref=360,100 |      |             |              |              |         |
| Peak #                                      | RetTime [min]                  | Type | Width [min] | Area [mAU*s] | Height [mAU] | Area %  |
| 1                                           | 25.969                         | MM   | 0.6423      | 997.43585    | 25.88220     | 3.3740  |
| 2                                           | 28.316                         | MM   | 0.8177      | 2.85648e4    | 582.20422    | 96.6260 |

Totals : 2.95622e4 608.08643  
 Results obtained with enhanced integrator!  
 Signal 4: DAD1 D, Sig=230,10 Ref=360,100  
 Signal 5: DAD1 E, Sig=280,10 Ref=360,100

=====  
 \*\*\* End of Report \*\*\*  
 =====

=====  
 Injection Date : 1/3/2013 5:51:12 PM      Seq. Line : 2  
 Sample Name : JC9147A                      Location : Vial 4  
 Acq. Operator : CE                            Inj : 1  
 Acq. Instrument : Instrument 1              Inj Volume : 15 µl  
 Different Inj Volume from Sequence 1      Actual Inj Volume : 5 µl  
 Acq. Method : C:\HPCHEM\1\METHODS\AD-02-30.M  
 Last changed : 1/3/2013 5:29:04 PM by CE  
 Analysis Method : C:\HPCHEM\1\METHODS\OD-02-20.M  
 Last changed : 7/30/2014 5:00:07 PM by MK  
 (modified after loading)

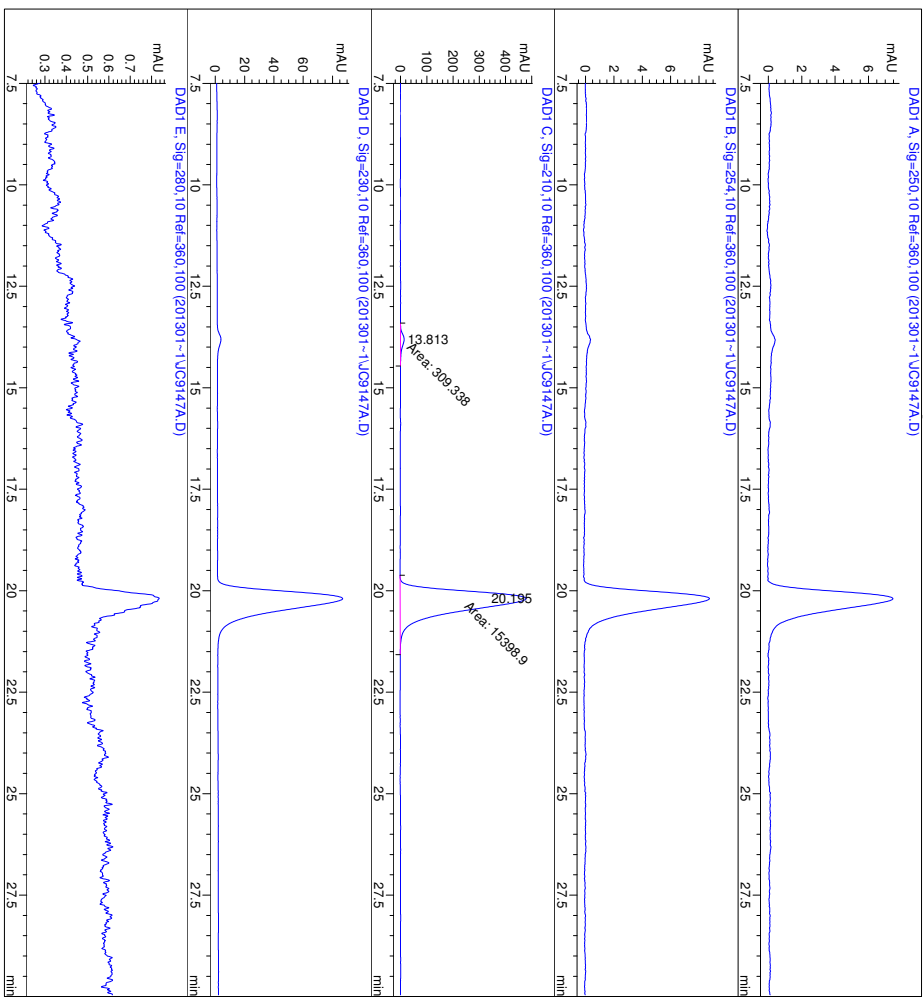

=====  
 Area Percent Report  
 =====  
 Sorted By : Signal  
 Multiplier : 1.0000  
 Dilution : 1.0000  
 Use Multiplier & Dilution Factor with ISTDs

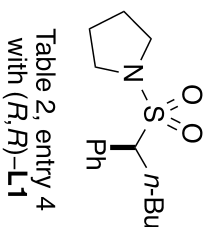

Signal 1: DADI A, Sig=250,10 Ref=360,100

Signal 2: DADI B, Sig=254,10 Ref=360,100

Signal 3: DADI C, Sig=210,10 Ref=360,100

| Peak # | RetTime [min] | Type | Width [min] | Area [mAU*s] | Height [mAU] | Area %  |
|--------|---------------|------|-------------|--------------|--------------|---------|
| 1      | 13.813        | MM   | 0.3644      | 309.33765    | 14.14928     | 1.9693  |
| 2      | 20.195        | MM   | 0.5342      | 1.53989e4    | 480.47076    | 98.0307 |

Totals : 1.57082e4 494.62004

Results obtained with enhanced integrator!

Signal 4: DADI D, Sig=230,10 Ref=360,100

Signal 5: DADI E, Sig=280,10 Ref=360,100

\*\*\* End of Report \*\*\*

=====  
Injection Date : 1/3/2013 6:22:31 PM      Seq. Line : 3  
Sample Name : JC9147B                      Location : Vial 5  
Acq. Operator : CE                            Inj : 1  
Acq. Instrument : Instrument 1              Inj Volume : 15 µl  
Different Inj Volume from Sequence 1      Actual Inj Volume : 5 µl  
Acq. Method : C:\HPCHEM\1\METHODS\AD-02-30.M  
Last changed : 1/3/2013 5:29:04 PM by CE  
Analysis Method : C:\HPCHEM\1\METHODS\AD005-40.M  
Last changed : 8/1/2014 11:14:55 PM by MK  
(modified after loading)

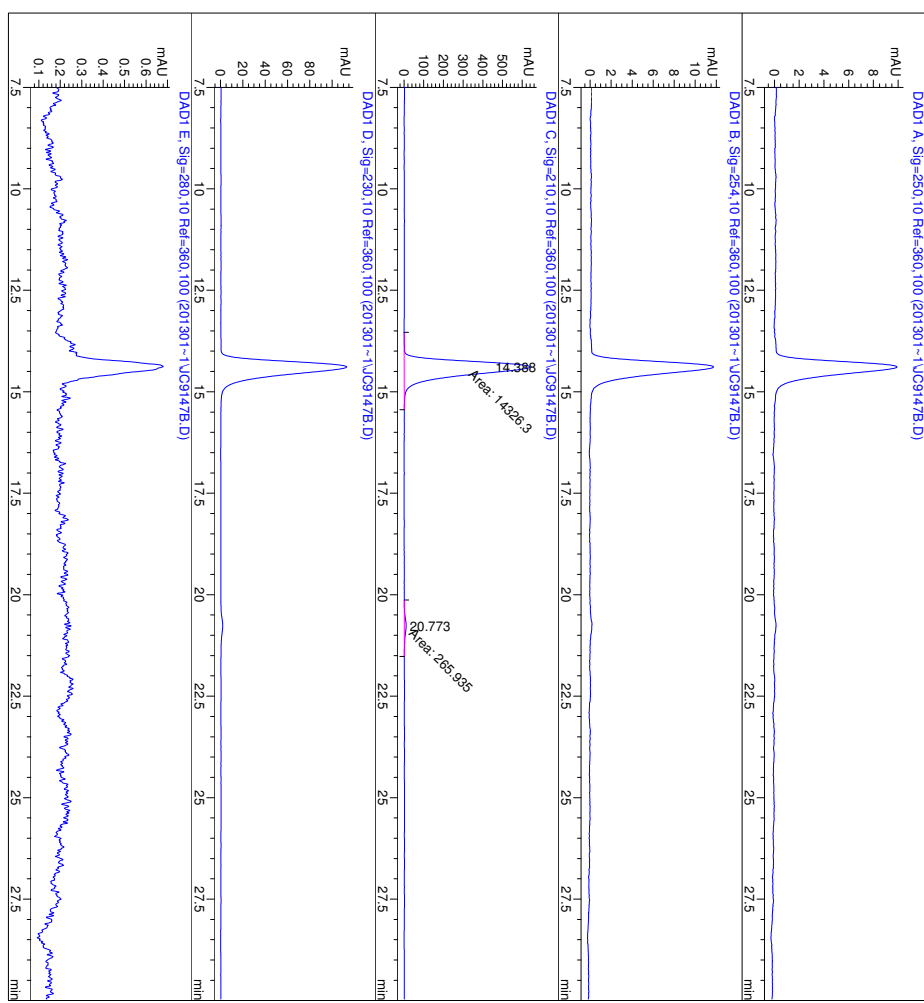

=====  
Area Percent Report  
=====  
Sorted By : Signal  
Multiplier : 1.0000  
Dilution : 1.0000  
Use Multiplier & Dilution Factor with ISTDs

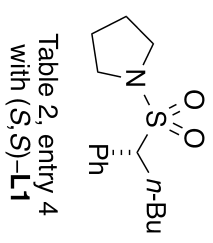

Signal 1: DAD1 A, Sig=250,10 Ref=360,100  
Signal 2: DAD1 B, Sig=254,10 Ref=360,100  
Signal 3: DAD1 C, Sig=210,10 Ref=360,100

| Peak # | RetTime [min] | Type | Width [min] | Area [mAU*s] | Height [mAU] | Area %  |
|--------|---------------|------|-------------|--------------|--------------|---------|
| 1      | 14.388        | MM   | 0.3734      | 1.43263e4    | 639.37732    | 98.1776 |
| 2      | 20.773        | MM   | 0.4779      | 265.93488    | 9.27401      | 1.8224  |

Totals : 1.45922e4 648.65133

Results obtained with enhanced integrator!  
Signal 4: DAD1 D, Sig=230,10 Ref=360,100  
Signal 5: DAD1 E, Sig=280,10 Ref=360,100

\*\*\* End of Report \*\*\*

Injection Date : 1/17/2013 6:42:19 PM  
 Sample Name : JC9155  
 Acq. Operator : CE  
 Acq. Instrument : Instrument 1  
 Different Inj Volume from Sequence : Actual Inj Volume : 5 µl  
 Inj Volume : 15 µl  
 Acq. Method : C:\HPCHEM\1\METHODS\OD-03-30.M  
 Last changed : 12/31/2012 2:58:25 PM by CE  
 Analysis Method : C:\HPCHEM\1\METHODS\OD-02-20.M  
 Last changed : 7/30/2014 5:02:27 PM by MK  
 (modified after loading)

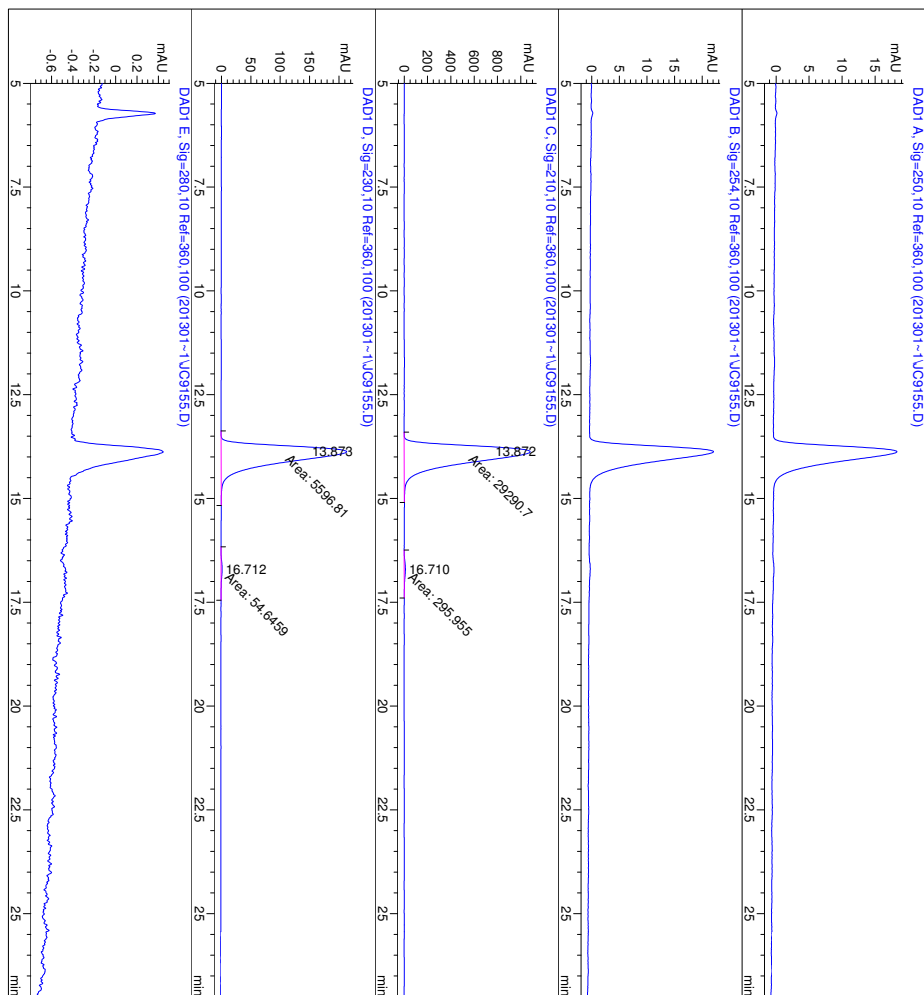

Area Percent Report

Sorted By : Signal  
 Multiplier : 1.0000  
 Dilution : 1.0000  
 Use Multiplier & Dilution Factor with ISTDs

| Signal                                   | RetTime [min] | Width [min] | Area [mAU*s] | Height [mAU] | Area %  |
|------------------------------------------|---------------|-------------|--------------|--------------|---------|
| Signal 1: DADI A, Sig=250,10 Ref=360,100 | 13.872        | 0.4517      | 2.92907e4    | 1080.68958   | 98.9997 |
| Signal 2: DADI B, Sig=254,10 Ref=360,100 | 16.710        | 0.4686      | 295.95520    | 10.52571     | 1.0003  |
| Signal 3: DADI C, Sig=210,10 Ref=360,100 | 13.872        | 0.4517      | 2.92907e4    | 1080.68958   | 98.9997 |
| Signal 4: DADI D, Sig=230,10 Ref=360,100 | 16.710        | 0.4778      | 54.64594     | 1.90619      | 0.9669  |
| Signal 5: DADI E, Sig=280,10 Ref=360,100 | 13.872        | 0.4361      | 5596.80615   | 213.91138    | 99.0331 |
| Signal 5: DADI E, Sig=280,10 Ref=360,100 | 16.712        | 0.4778      | 54.64594     | 1.90619      | 0.9669  |

Totals : 2.95866e4 1091.21529

Results obtained with enhanced integrator!

Results obtained with enhanced integrator!  
 Results obtained with enhanced integrator!

\*\*\* End of Report \*\*\*

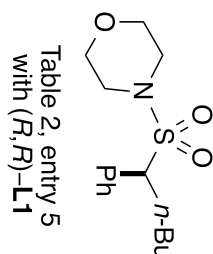

=====  
Injection Date : 12/31/2012 3:20:37 PM      Seq. Line : 2  
Sample Name : JC9139B                            Location : Vial 3  
Acq. Operator : CE                                Inj : 1  
Acq. Instrument : Instrument 1                   Inj Volume : 15 µl  
Different Inj Volume from Sequence 1  
Acq. Method : C:\HPCHEM\1\METHODS\VD-03-30.M  
Last changed : 12/31/2012 2:58:25 PM by CE  
Analysis Method : C:\HPCHEM\1\METHODS\AD005-40.M  
Last changed : 8/1/2014 11:17:34 PM by MK  
(modified after loading)

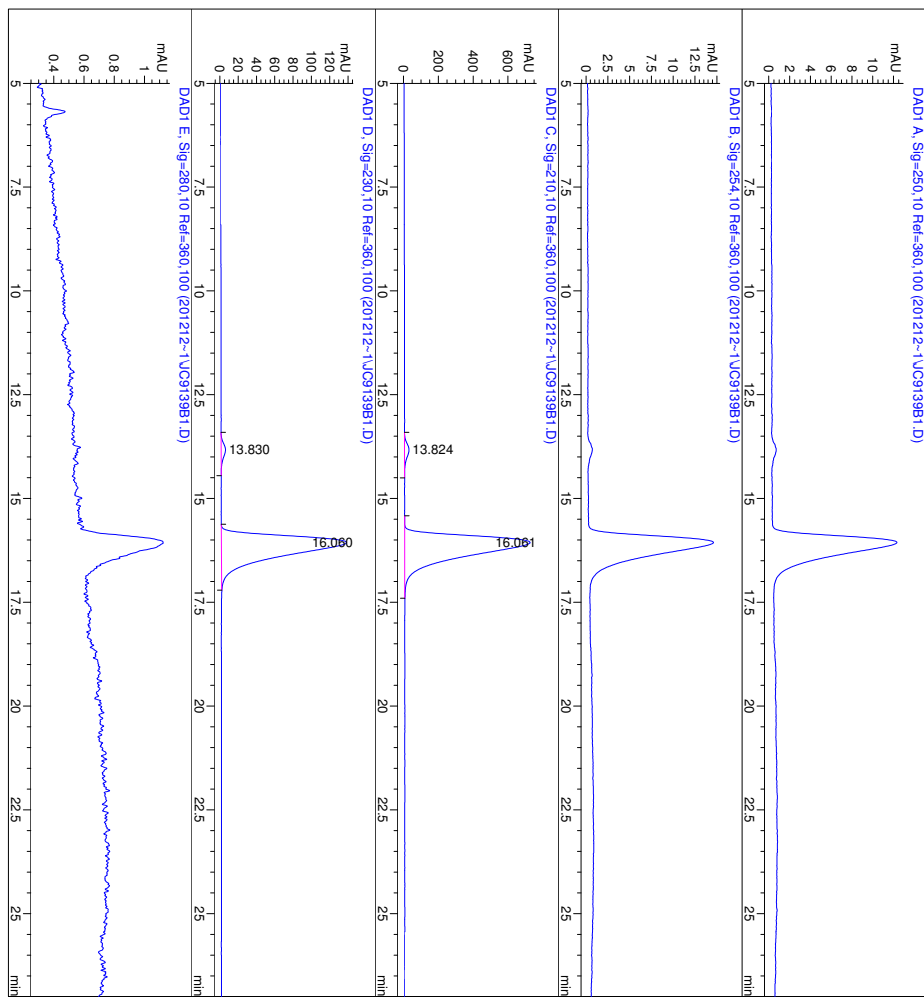

=====  
Area Percent Report  
=====

Sorted By : Signal  
Multiplier : 1.0000  
Dilution : 1.0000  
Use Multiplier & Dilution Factor with ISTDs

Signal 1: DAD1 A, Sig=250,10 Ref=360,100

Signal 2: DAD1 B, Sig=254,10 Ref=360,100

Signal 3: DAD1 C, Sig=210,10 Ref=360,100

| Peak # | RetTime [min] | Type | Width [min] | Area [mAU*s] | Height [mAU] | Area %  |
|--------|---------------|------|-------------|--------------|--------------|---------|
| 1      | 13.824        | PB   | 0.3375      | 612.77722    | 25.76346     | 2.5717  |
| 2      | 16.061        | PB   | 0.4739      | 2.32153e4    | 720.54395    | 97.4283 |

Totals : 2.38281e4 746.30741

Results obtained with enhanced integrator!

Signal 4: DAD1 D, Sig=230,10 Ref=360,100

| Peak # | RetTime [min] | Type | Width [min] | Area [mAU*s] | Height [mAU] | Area %  |
|--------|---------------|------|-------------|--------------|--------------|---------|
| 1      | 13.830        | BP   | 0.3511      | 110.67741    | 4.72843      | 2.4877  |
| 2      | 16.060        | BB   | 0.4794      | 4338.34521   | 137.02046    | 97.5123 |

Totals : 4449.02262 141.74889

Results obtained with enhanced integrator!

Signal 5: DAD1 E, Sig=280,10 Ref=360,100

=====  
\*\*\* End of Report \*\*\*  
=====

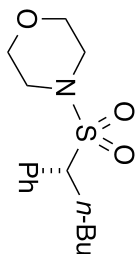

Table 2, entry 5  
with (S,S)-L1

Injection Date : 5/19/2013 5:16:09 PM  
 Sample Name : JCI10093A  
 Acq. Operator : CE  
 Acq. Instrument : Instrument 1  
 Different Inj Volume from Sequence : Inj Volume : 15 µl  
 Actual Inj Volume : 5 µl  
 Acq. Method : C:\HPCHEM\1\METHODS\OD-01-40.M  
 Last changed : 12/18/2012 2:31:36 PM by CE  
 Analysis Method : C:\HPCHEM\1\METHODS\OD-02-20.M  
 Last changed : 7/30/2014 5:05:01 PM by MK  
 (modified after loading)

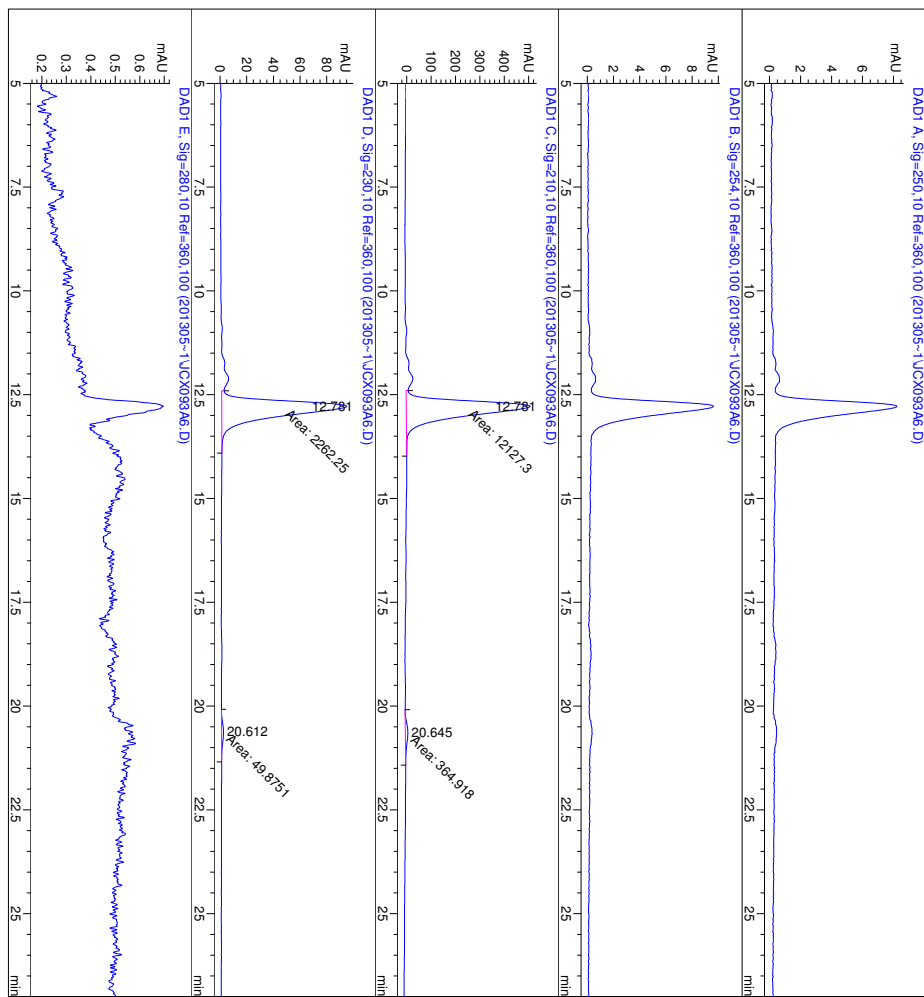

Area Percent Report  
 Sorted By : Signal  
 Multiplier : 1.0000  
 Dilution : 1.0000  
 Use Multiplier & Dilution Factor with ISTDs

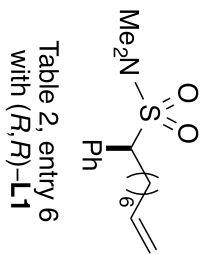

| Peak # | RetTime [min] | Type | Width [min] | Area [mAU*s] | Height [mAU] | Area %  |
|--------|---------------|------|-------------|--------------|--------------|---------|
| 1      | 12.781        | FM   | 0.3974      | 1.21273e4    | 508.56665    | 97.0788 |
| 2      | 20.645        | MM   | 0.5908      | 364.91779    | 10.29492     | 2.9212  |

Totals : 1.24922e4 518.86157  
 Results obtained with enhanced integrator!  
 Signal 4: DAD1 D, Sig=230,10 Ref=360,100  
 Signal 5: DAD1 E, Sig=280,10 Ref=360,100

| Peak # | RetTime [min] | Type | Width [min] | Area [mAU*s] | Height [mAU] | Area %  |
|--------|---------------|------|-------------|--------------|--------------|---------|
| 1      | 12.781        | FM   | 0.4017      | 2262.25317   | 93.85459     | 97.8429 |
| 2      | 20.612        | MM   | 0.5479      | 49.87514     | 1.51723      | 2.1571  |

Totals : 2312.12832 95.37182  
 Results obtained with enhanced integrator!

\*\*\* End of Report \*\*\*



Injection Date : 5/19/2013 5:57:27 PM  
 Sample Name : JCI10093B  
 Acq. Operator : CE  
 Acq. Instrument : Instrument 1  
 Different Inj Volume from Sequence : Inj Volume : 1  
 Last changed : 12/18/2012 2:31:36 PM by CE  
 Analysis Method : C:\HPCHEM\1\METHODS\A0005-40.M  
 Last changed : 8/2/2014 9:01:58 PM by MK  
 (modified after loading)

Seq. Line : 3  
 Location : Vial 42  
 Inj : 1  
 Inj Volume : 15 µl  
 Actual Inj Volume : 5 µl

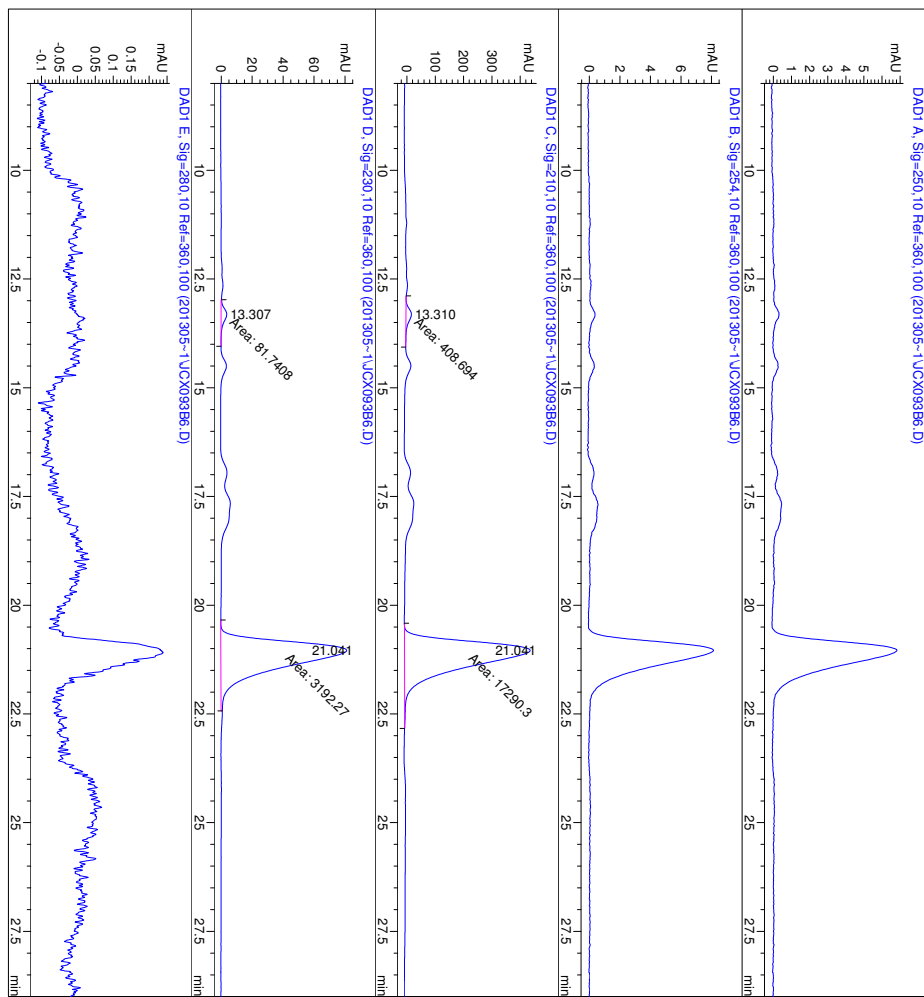

Sorted By : Signal  
 Multiplier : 1.0000  
 Dilution : 1.0000  
 Use Multiplier & Dilution Factor with ISTDs

| Peak # | RetTime [min] | Type | Width [min] | Area [mAU*s] | Height [mAU] | Area %  |
|--------|---------------|------|-------------|--------------|--------------|---------|
| 1      | 13.310        | MM   | 0.3540      | 408.69366    | 19.24129     | 2.3091  |
| 2      | 21.041        | MM   | 0.6492      | 1.72903e4    | 443.91245    | 97.6909 |

Totals : 1.76990e4 463.15373  
 Results obtained with enhanced integrator!  
 Signal 4: DAD1 D, Sig=230,10 Ref=360,100

| Peak # | RetTime [min] | Type | Width [min] | Area [mAU*s] | Height [mAU] | Area %  |
|--------|---------------|------|-------------|--------------|--------------|---------|
| 1      | 13.307        | FM   | 0.3703      | 81.74083     | 3.67898      | 2.4967  |
| 2      | 21.041        | MF   | 0.6541      | 3192.27197   | 81.33752     | 97.5033 |

Totals : 3274.01280 85.01650  
 Results obtained with enhanced integrator!  
 Signal 5: DAD1 E, Sig=280,10 Ref=360,100

\*\*\* End of Report \*\*\*

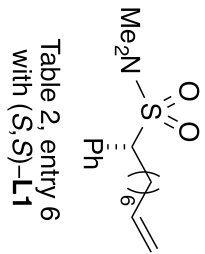

=====  
 Injection Date : 10/23/2013 1:57:18 PM      Seq. Line : 2  
 Sample Name : PM2-21A                              Location : Vial 13  
 Acq. Operator : MK                                    Inj : 1  
 Acq. Instrument : Instrument 1                    Inj Volume : 15 µl  
 Different Inj Volume from Sequence 1          Actual Inj Volume : 5 µl  
 Acq. Method : C:\HPCHEM\1\METHODS\OD-02-30.M  
 Last changed : 9/13/2013 12:42:31 PM by MK  
 Analysis Method : C:\HPCHEM\1\METHODS\OD-02-20.M  
 Last changed : 7/30/2014 5:07:11 PM by MK  
 (modified after loading)

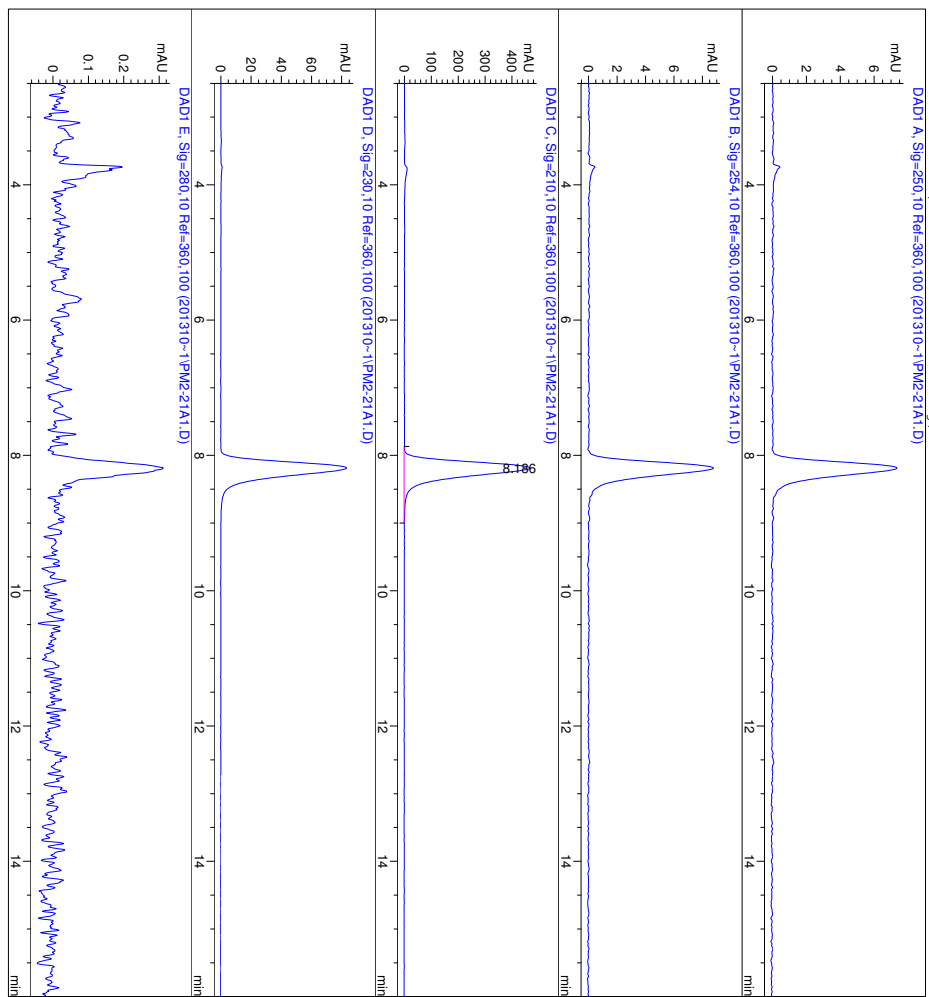

=====  
 Area Percent Report  
 =====  
 Sorted By : Signal  
 Multiplier : 1.0000  
 Dilution : 1.0000  
 Use Multiplier & Dilution Factor with ISTDs

Signal 1: DADI A, Sig=250,10 Ref=360,100

Signal 2: DADI B, Sig=254,10 Ref=360,100

Signal 3: DADI C, Sig=210,10 Ref=360,100

| Peak # | RetTime [min] | Type | Width [min] | Area [mAU*s] | Height [mAU] | Area %   |
|--------|---------------|------|-------------|--------------|--------------|----------|
| 1      | 8.186         | VB   | 0.2249      | 6870.03662   | 468.96442    | 100.0000 |

Totals : 6870.03662 468.96442

Results obtained with enhanced integrator!

Signal 4: DADI D, Sig=230,10 Ref=360,100

Signal 5: DADI E, Sig=280,10 Ref=360,100

=====  
 \*\*\* End of Report \*\*\*  
 =====

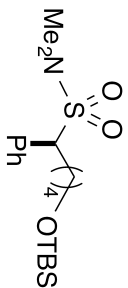

Table 2, entry 7  
 with (R,R)-L1

=====  
 Injection Date : 10/23/2013 2:28:36 PM      Seq. Line : 3  
 Sample Name : PM2-21B                            Location : Vial 14  
 Acq. Operator : MK                                Inj : 1  
 Acq. Instrument : Instrument 1                   Inj Volume : 15 µl  
 Different Inj Volume from Sequence 1          Actual Inj Volume : 5 µl  
 Acq. Method : C:\HPCHEM\1\METHODS\OD-02-30.M  
 Last changed : 9/13/2013 12:42:31 PM by MK  
 Analysis Method : C:\HPCHEM\1\METHODS\AD005-40.M  
 Last changed : 8/1/2014 11:25:57 PM by MK  
 (modified after loading)

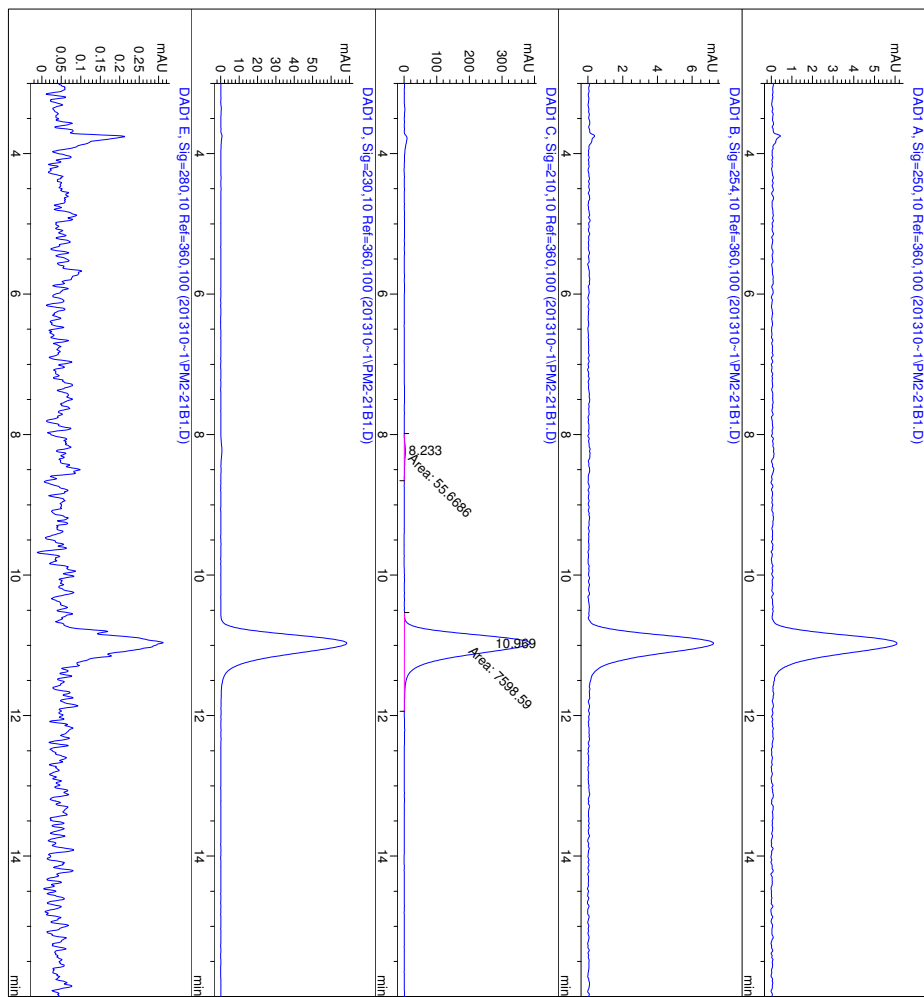

=====  
 Area Percent Report  
 =====

Sorted By : Signal  
 Multiplier : 1.0000  
 Dilution : 1.0000  
 Use Multiplier & Dilution Factor with ISTDs

Signal 1: DAD1 A, Sig=250,10 Ref=360,100

Signal 2: DAD1 B, Sig=254,10 Ref=360,100

Signal 3: DAD1 C, Sig=210,10 Ref=360,100

| Peak # | RetTime [min] | Type | Width [min] | Area [mAU*s] | Height [mAU] | Area %  |
|--------|---------------|------|-------------|--------------|--------------|---------|
| 1      | 8.233         | MM   | 0.2711      | 55.66857     | 3.42192      | 0.7273  |
| 2      | 10.969        | MM   | 0.3284      | 7598.58594   | 385.60574    | 99.2727 |

Totals : 7654.25451 389.02767

Results obtained with enhanced integrator!

Signal 4: DAD1 D, Sig=230,10 Ref=360,100

Signal 5: DAD1 E, Sig=280,10 Ref=360,100

=====  
 \*\*\* End of Report \*\*\*  
 =====

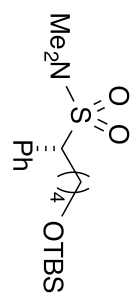

Table 2, entry 7  
 with (S,S)-L1

Injection Date : 2/22/2013 11:28:27 AM  
 Sample Name : JC9221A  
 Acq. Operator : CE  
 Acq. Instrument : Instrument 1  
 Different Inj Volume from Sequence : Actual Inj Volume : 15 µl  
 Inj Volume : 5 µl  
 Acq. Method : C:\HPCHEM\1\METHODS\OD-05-40.M  
 Last changed : 4/7/2011 5:39:35 PM by CC  
 Analysis Method : C:\HPCHEM\1\METHODS\OD-02-20.M  
 Last changed : 7/30/2014 5:09:46 PM by MK  
 (modified after loading)

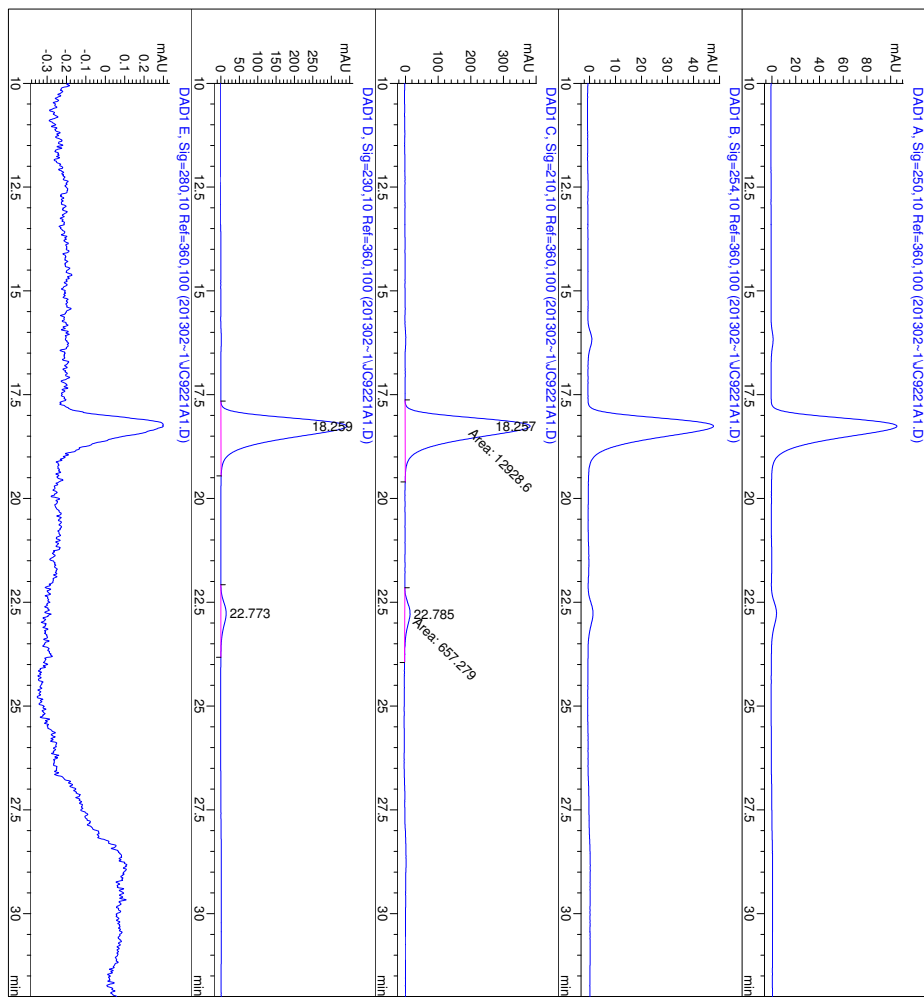

Area Percent Report  
 Sorted By : Signal  
 Multiplier : 1.0000  
 Dilution : 1.0000  
 Use Multiplier & Dilution Factor with ISTDs

Signal 1: DAD1 A, Sig=250,10 Ref=360,100

Signal 2: DAD1 B, Sig=254,10 Ref=360,100

Signal 3: DAD1 C, Sig=210,10 Ref=360,100

| Peak # | RetTime [min] | Type | Width [min] | Area [mAU*s] | Height [mAU] | Area %  |
|--------|---------------|------|-------------|--------------|--------------|---------|
| 1      | 18.257        | MM   | 0.5628      | 1.29286e4    | 382.84482    | 95.1621 |
| 2      | 22.785        | MM   | 0.6684      | 657.27887    | 16.39051     | 4.8379  |

Totals : 1.35859e4 399.23533

Results obtained with enhanced integrator!

Signal 4: DAD1 D, Sig=230,10 Ref=360,100

| Peak # | RetTime [min] | Type | Width [min] | Area [mAU*s] | Height [mAU] | Area %  |
|--------|---------------|------|-------------|--------------|--------------|---------|
| 1      | 18.259        | BB   | 0.5223      | 1.15049e4    | 342.18851    | 95.1596 |
| 2      | 22.773        | BB   | 0.5728      | 585.20709    | 14.37923     | 4.8404  |

Totals : 1.20901e4 356.56774

Results obtained with enhanced integrator!

Signal 5: DAD1 E, Sig=280,10 Ref=360,100

\*\*\* End of Report \*\*\*

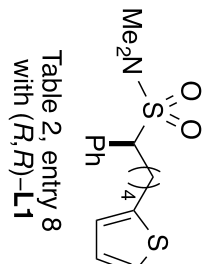

Injection Date : 2/22/2013 12:09:44 PM  
 Sample Name : JC9221B  
 Acq. Operator : CE  
 Acq. Instrument : Instrument 1  
 Different Inj Volume from Sequence :  
 Last changed : 4/7/2011 5:39:35 PM by CC  
 Analysis Method : C:\HPCHEM\1\METHODS\AD005-40.M  
 Last changed : 8/2/2014 9:04:09 PM by MK  
 (modified after loading)

Seq. Line : 3  
 Location : Vial 10  
 Inj : 1  
 Inj Volume : 15 µl  
 Actual Inj Volume : 5 µl

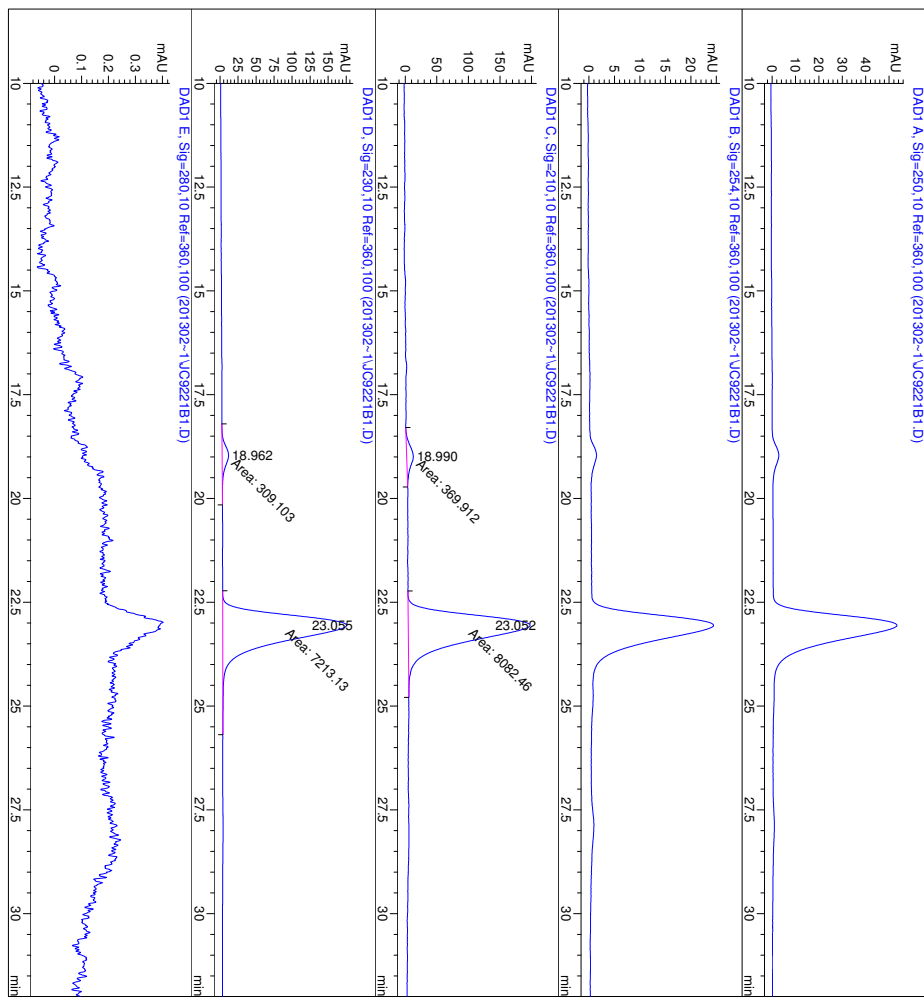

Area Percent Report

Sorted By : Signal  
 Multiplier : 1.0000  
 Dilution : 1.0000  
 Use Multiplier & Dilution Factor with ISTDs

Signal 1: DAD1 A, Sig=250,10 Ref=360,100

Signal 2: DAD1 B, Sig=254,10 Ref=360,100

Signal 3: DAD1 C, Sig=210,10 Ref=360,100

| Peak # | RetTime [min] | Type | Width [min] | Area [mAU*s] | Height [mAU] | Area %  |
|--------|---------------|------|-------------|--------------|--------------|---------|
| 1      | 18.990        | MM   | 0.5818      | 369.91183    | 10.59696     | 4.3764  |
| 2      | 23.052        | MM   | 0.6975      | 8082.46289   | 193.11874    | 95.6236 |

Totals : 8452.37473 203.71571

Results obtained with enhanced integrator!

Signal 4: DAD1 D, Sig=230,10 Ref=360,100

| Peak # | RetTime [min] | Type | Width [min] | Area [mAU*s] | Height [mAU] | Area %  |
|--------|---------------|------|-------------|--------------|--------------|---------|
| 1      | 18.962        | MM   | 0.5785      | 309.10349    | 8.90468      | 4.1092  |
| 2      | 23.055        | MM   | 0.6991      | 7213.12598   | 171.96364    | 95.8908 |

Totals : 7522.22946 180.86832

Results obtained with enhanced integrator!

Signal 5: DAD1 E, Sig=280,10 Ref=360,100

\*\*\* End of Report \*\*\*

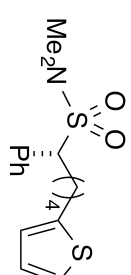

Table 2, entry 8 with (S,S)-L1

```

=====
Injection Date : 6/16/2014 7:47:41 PM      Seq. Line : 4
Sample Name    : JC12043A                  Location  : Vial 11
Acq. Operator  : MK                        Inj       : 1
Acq. Instrument : Instrument 1              Inj Volume: 15 µl
Different Inj Volume from Sequence 1       Actual Inj Volume : 6 µl
Acq. Method    : C:\HPCHEM\1\METHODS\OD-01-30.M
Last changed   : 6/16/2014 7:51:29 PM by MK
              (modified after loading)
Analysis Method : C:\HPCHEM\1\METHODS\OD-02-20.M
Last changed   : 7/30/2014 6:54:33 PM by MK
              (modified after loading)
=====
    
```

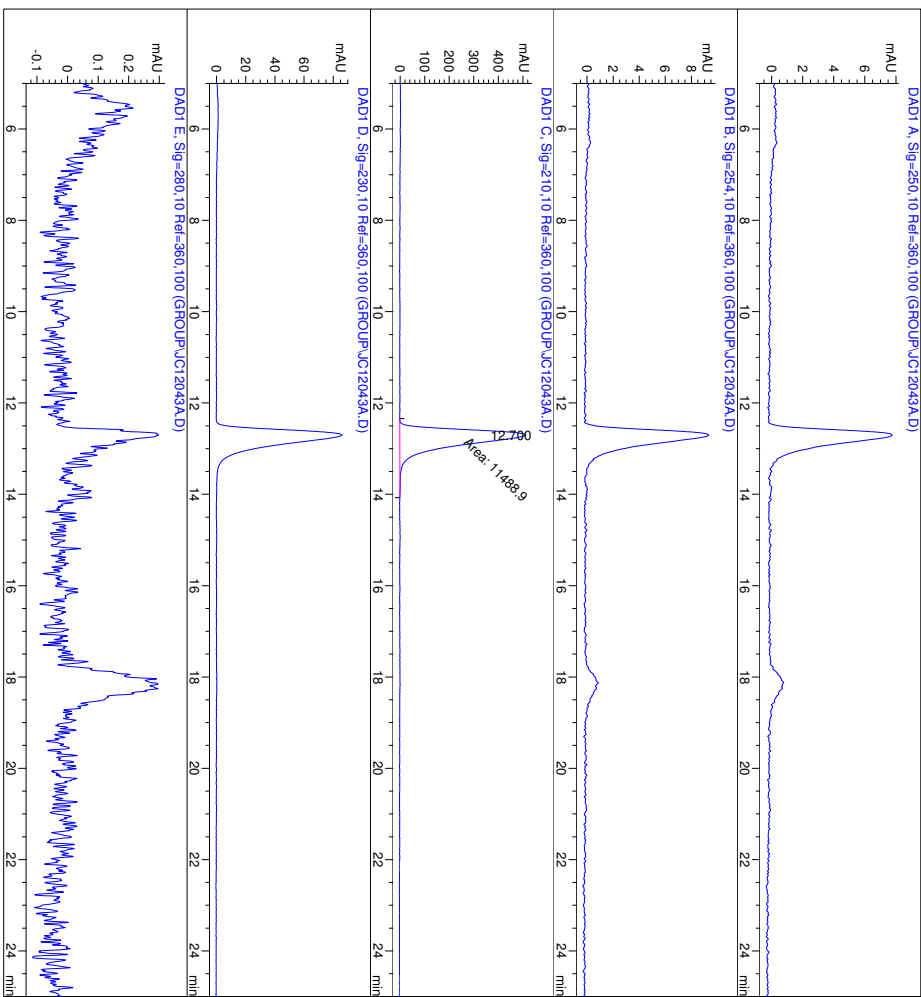

```

=====
Area Percent Report
=====
Sorted By      : Signal
Multiplier    : 1.0000
Dilution      : 1.0000
Use Multiplier & Dilution Factor with ISTDs
Signal 1: DADI A, Sig=250,10 Ref=360,100
Signal 2: DADI B, Sig=254,10 Ref=360,100
Signal 3: DADI C, Sig=210,10 Ref=360,100
Signal 4: DADI D, Sig=230,10 Ref=360,100
Signal 5: DADI E, Sig=280,10 Ref=360,100
=====
    
```

| Peak #   | RetTime [min] | Type | Width [min] | Area [mAU*s] | Height [mAU] | Area %   |
|----------|---------------|------|-------------|--------------|--------------|----------|
| 1        | 12.700        | MM   | 0.3740      | 1.14889e4    | 512.01752    | 100.0000 |
| Totals : |               |      |             | 1.14889e4    | 512.01752    |          |

Results obtained with enhanced integrator!

Signal 4: DADI D, Sig=230,10 Ref=360,100

Signal 5: DADI E, Sig=280,10 Ref=360,100

\*\*\* End of Report \*\*\*

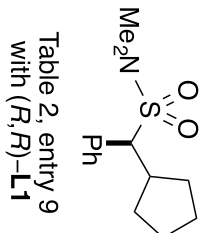

=====  
 Injection Date : 6/16/2014 8:19:00 PM      Seq. Line : 5  
 Sample Name : JC12043B                      Location : Vial 12  
 Acq. Operator : MK                            Inj : 1  
 Acq. Instrument : Instrument 1                Inj Volume : 15 µl  
 Different Inj Volume from Sequence 1        Actual Inj Volume : 6 µl  
 Acq. Method : C:\HPCHEM\1\METHODS\AD005-40.M  
 Last changed : 6/16/2014 7:51:29 PM by MK  
 (modified after loading)  
 Analysis Method : C:\HPCHEM\1\METHODS\AD005-40.M  
 Last changed : 8/1/2014 11:32:53 PM by MK  
 (modified after loading)

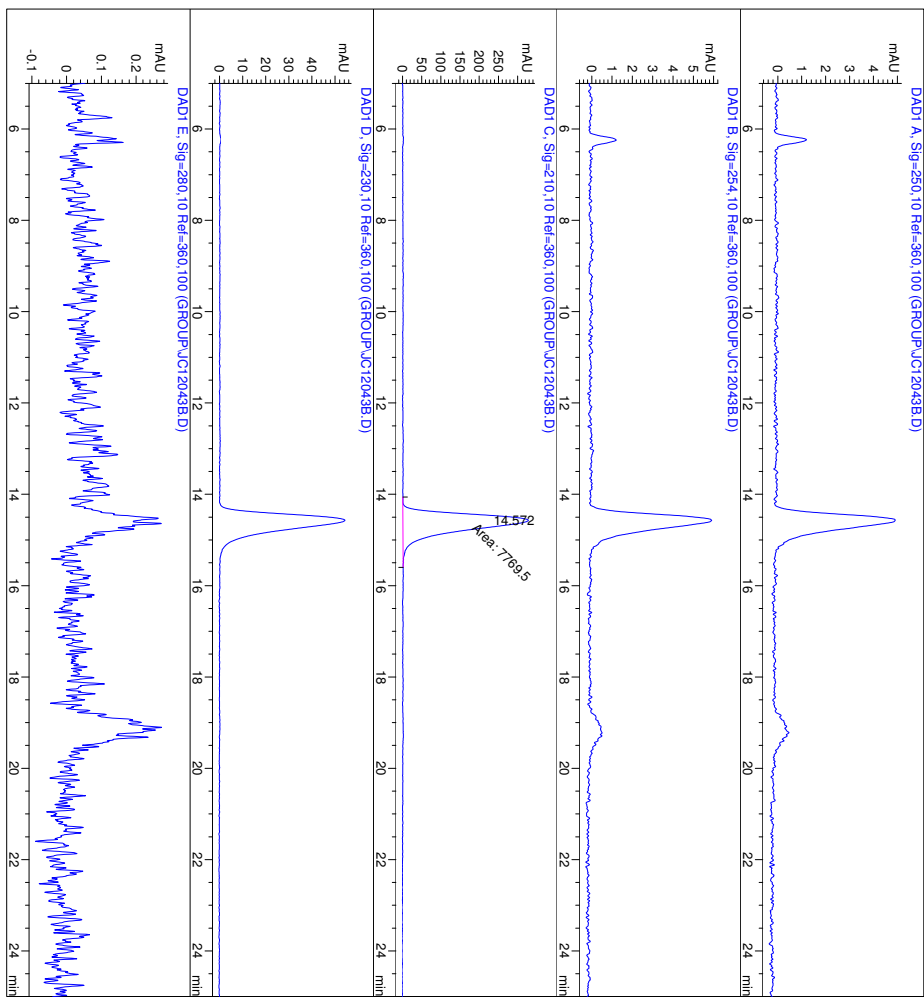

=====  
 Area Percent Report  
 =====

Sorted By : Signal  
 Multiplier : 1.0000  
 Dilution : 1.0000  
 Use Multiplier & Dilution Factor with ISTDs

Signal 1: DADI A, Sig=250,10 Ref=360,100  
 Signal 2: DADI B, Sig=254,10 Ref=360,100  
 Signal 3: DADI C, Sig=210,10 Ref=360,100

| Peak # | RetTime [min] | Type | Width [min] | Area [mAU*s] | Height [mAU] | Area %   |
|--------|---------------|------|-------------|--------------|--------------|----------|
| 1      | 14.572        | MM   | 0.3958      | 7769.50049   | 327.13113    | 100.0000 |

Totals :                      7769.50049    327.13113  
 Results obtained with enhanced integrator!  
 Signal 4: DADI D, Sig=230,10 Ref=360,100  
 Signal 5: DADI E, Sig=280,10 Ref=360,100  
 \*\*\* End of Report \*\*\*

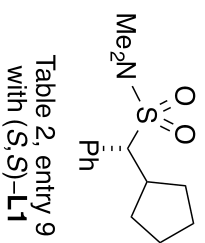

=====  
Injection Date : 12/7/2012 3:31:19 PM      Seq. Line : 3  
Sample Name : JC9111A                            Location : Vial 35  
Acq. Operator : CE                                Inj : 1  
Acq. Instrument : Instrument 1                 Inj Volume : 15 µl  
Diluent Inj Volume from Sequence 1  
Actual Inj Volume : 5 µl  
Acq. Method : C:\HPCHEM\1\METHODS\OD-05-40.M  
Last changed : 4/7/2011 5:39:35 PM by CC  
Analysis Method : C:\HPCHEM\1\METHODS\OD-02-20.M  
Last changed : 7/30/2014 6:56:15 PM by MK  
(modified after loading)

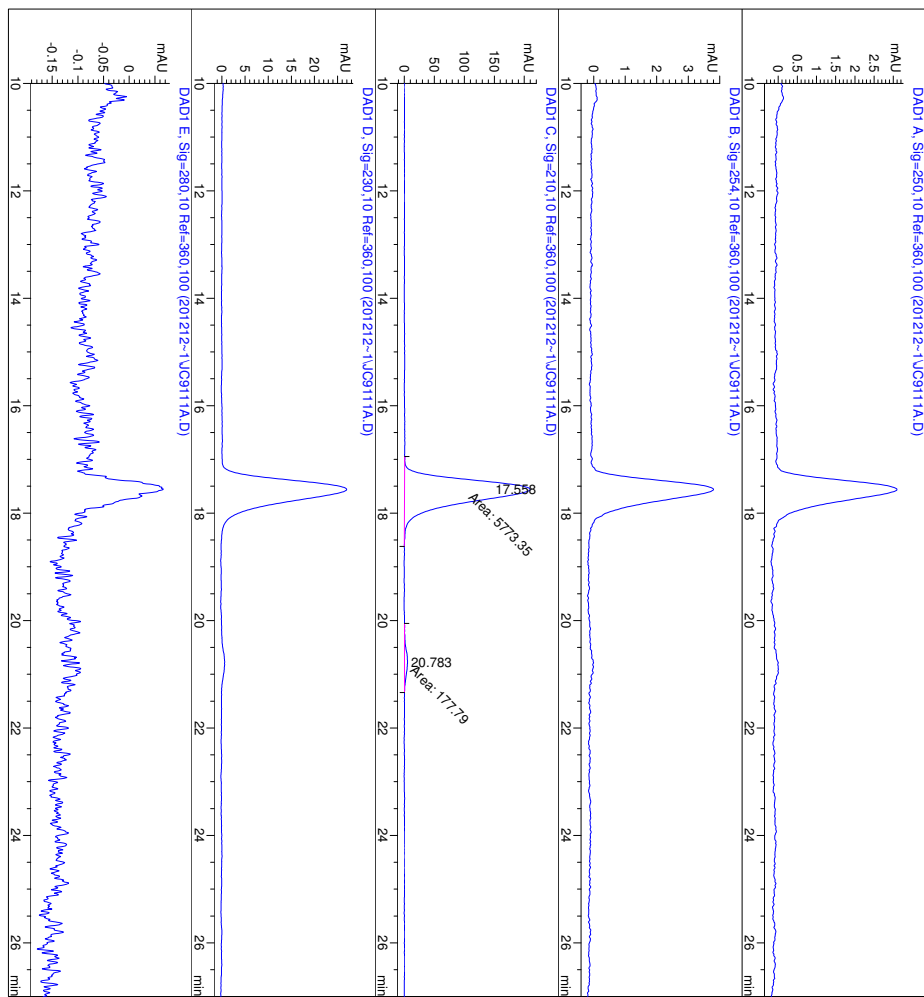

Area Percent Report

Sorted By : Signal  
Multiplier : 1.0000  
Dilution : 1.0000  
Use Multiplier & Dilution Factor with ISTDs

Signal 1: DADI A, Sig=250,10 Ref=360,100

Signal 2: DADI B, Sig=254,10 Ref=360,100

Signal 3: DADI C, Sig=210,10 Ref=360,100

| Peak # | RetTime [min] | Type | Width [min] | Area [mAU*s] | Height [mAU] | Area %  |
|--------|---------------|------|-------------|--------------|--------------|---------|
| 1      | 17.558        | MM   | 0.4595      | 5773.34912   | 209.42706    | 97.0125 |
| 2      | 20.783        | MM   | 0.5738      | 177.79001    | 5.16444      | 2.9875  |

Totals : 5951.13913 214.59150

Results obtained with enhanced integrator!

Signal 4: DADI D, Sig=230,10 Ref=360,100

Signal 5: DADI E, Sig=280,10 Ref=360,100

\*\*\* End of Report \*\*\*

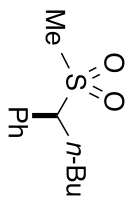



Injection Date : 12/14/2012 4:31:29 PM  
 Sample Name : JC9117  
 Acq. Operator : CE  
 Acq. Instrument : Instrument 1  
 Different Inj Volume from Sequence :  
 Last changed : 4/7/2011 5:39:35 PM by CC  
 Analysis Method : C:\HPCHEM\1\METHODS\A0005-40.M  
 Last changed : 8/1/2014 11:34:56 PM by MK  
 (modified after loading)

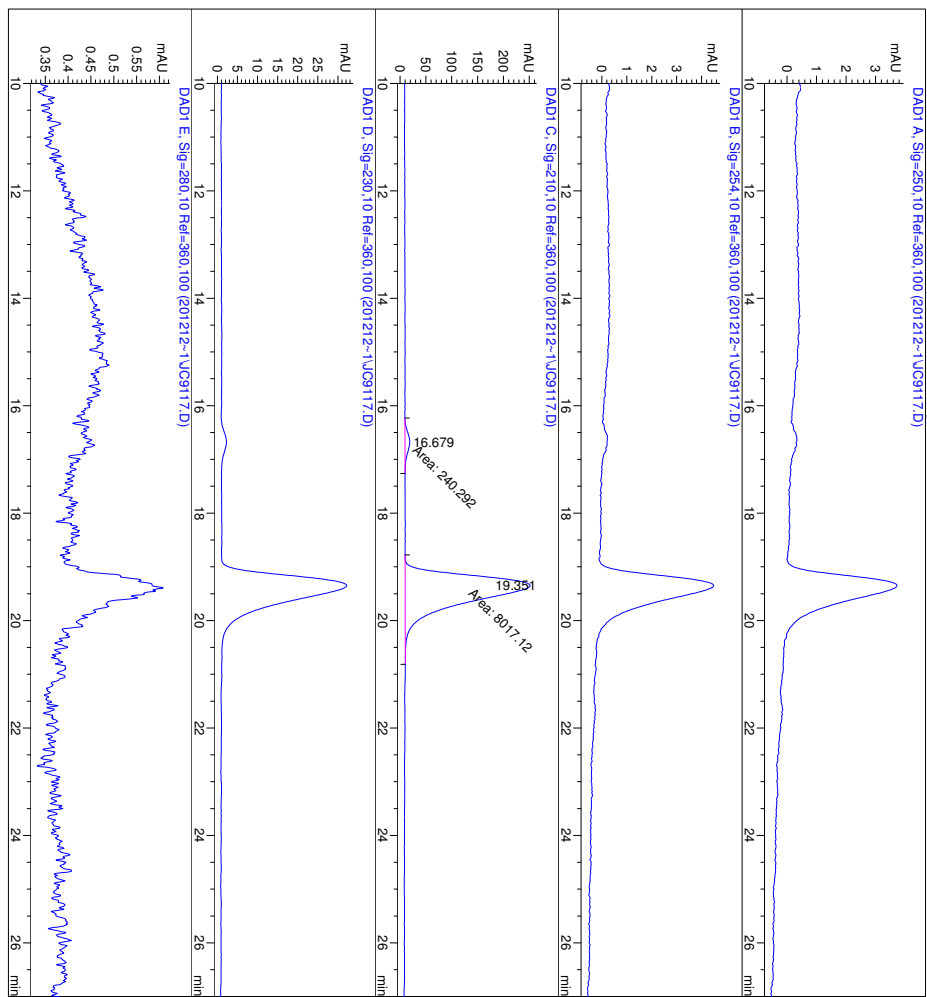

Area Percent Report

Sorted By : Signal  
 Multiplier : 1.0000  
 Dilution : 1.0000  
 Use Multiplier & Dilution Factor with ISTDs

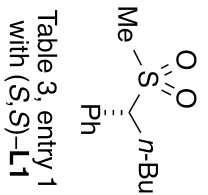

| Signal                                   | RetTime [min] | Type | Width [min] | Area [mAU*s] | Height [mAU] | Area %  |
|------------------------------------------|---------------|------|-------------|--------------|--------------|---------|
| Signal 1: DAD1 A, Sig=250,10 Ref=360,100 | 19.351        | MM   | 0.5532      | 8257.41116   | 241.52242    | 97.0900 |
| Signal 2: DAD1 B, Sig=254,10 Ref=360,100 | 19.351        | MM   | 0.5532      | 240.29202    | 9.33470      | 2.9100  |
| Signal 3: DAD1 C, Sig=210,10 Ref=360,100 | 16.679        | MM   | 0.4290      | 240.29202    | 9.33470      | 2.9100  |
| Signal 4: DAD1 D, Sig=230,10 Ref=360,100 | 16.679        | MM   | 0.4290      | 240.29202    | 9.33470      | 2.9100  |
| Signal 5: DAD1 E, Sig=280,10 Ref=360,100 | 16.679        | MM   | 0.4290      | 240.29202    | 9.33470      | 2.9100  |

Totals : 8257.41116 250.85712

Results obtained with enhanced integrator!

\*\*\* End of Report \*\*\*

=====  
 Injection Date : 7/20/2013 9:37:03 AM      Seq. Line : 34  
 Sample Name : JC10185                              Location : Vial 82  
 Acq. Operator : CE                                      Inj : 1  
 Acq. Instrument : Instrument 1                      Inj Volume : 15 µl  
 Different Inj Volume from Sequence !              Actual Inj Volume : 5 µl  
 Acq. Method : C:\HPCHEM\1\METHODS\AD-04-30.M  
 Last changed : 11/29/2010 7:04:08 PM by JTM  
 Analysis Method : C:\HPCHEM\1\METHODS\OD-02-20.M  
 Last changed : 7/30/2014 6:59:32 PM by MK  
 (modified after loading)

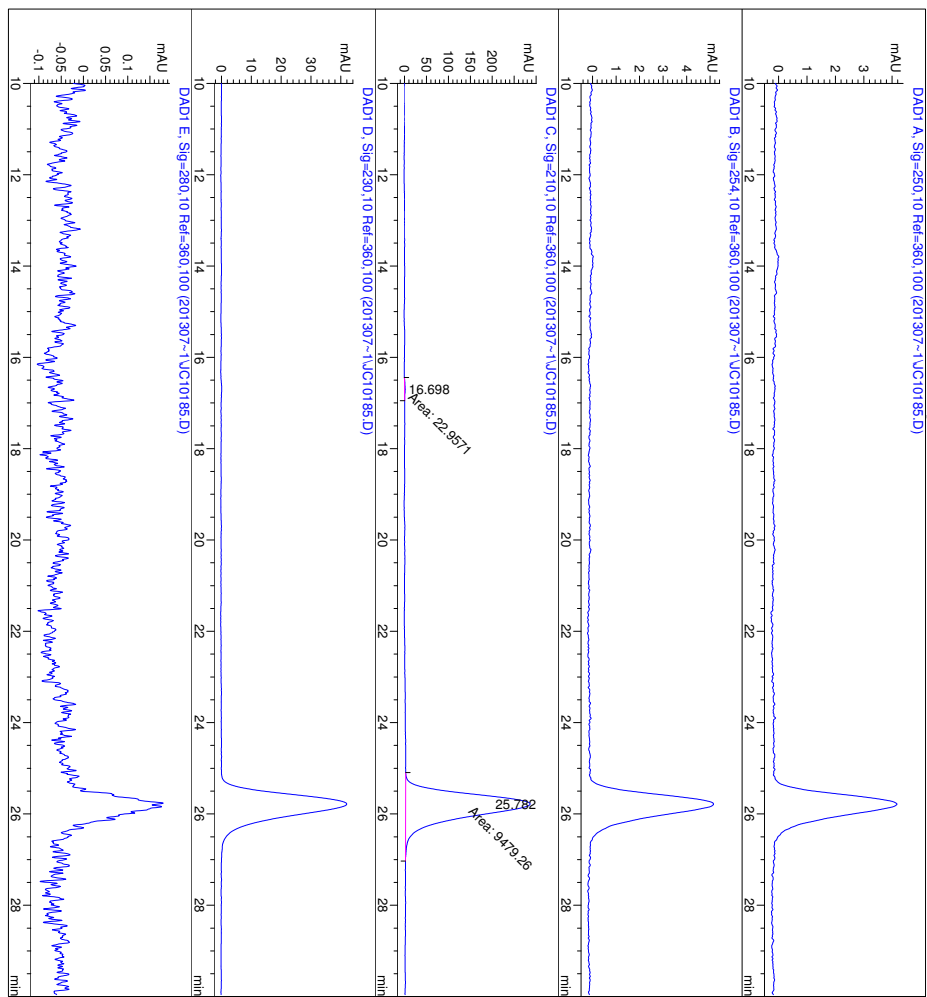

=====  
 Area Percent Report  
 =====  
 Sorted By : Signal  
 Multiplier : 1.0000  
 Dilution : 1.0000  
 Use Multiplier & Dilution Factor with ISTDs

Signal 1: DAD1 A, Sig=250,10 Ref=360,100

Signal 2: DAD1 B, Sig=254,10 Ref=360,100

Signal 3: DAD1 C, Sig=210,10 Ref=360,100

| Peak # | RetTime [min] | Type | Width [min] | Area [mAU*s] | Height [mAU] | Area %  |
|--------|---------------|------|-------------|--------------|--------------|---------|
| 1      | 16.698        | MM   | 0.2409      | 22.95708     | 1.58850      | 0.2416  |
| 2      | 25.782        | MM   | 0.5562      | 9479.26074   | 284.07181    | 99.7584 |

Totals : 9502.21782 285.66031

Results obtained with enhanced integrator!

Signal 4: DAD1 D, Sig=230,10 Ref=360,100

Signal 5: DAD1 E, Sig=280,10 Ref=360,100

\*\*\* End of Report \*\*\*

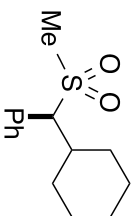

Table 3, entry 2  
 with (R,R)-L1

Injection Date : 7/20/2013 9:05:45 AM  
 Sample Name : JCI0119B  
 Acq. Operator : CE  
 Acq. Instrument : Instrument 1  
 Different Inj Volume from Sequence :  
 Last changed : 11/29/2010 7:04:08 PM by JTM  
 Analysis Method : C:\HPCHEM\1\METHODS\AD005-40.M  
 Last changed : 8/1/2014 11:37:12 PM by MK  
 (modified after loading)

Seq. Line : 33  
 Location : Vial 81  
 Inj : 1  
 Inj Volume : 15 µl  
 Actual Inj Volume : 5 µl

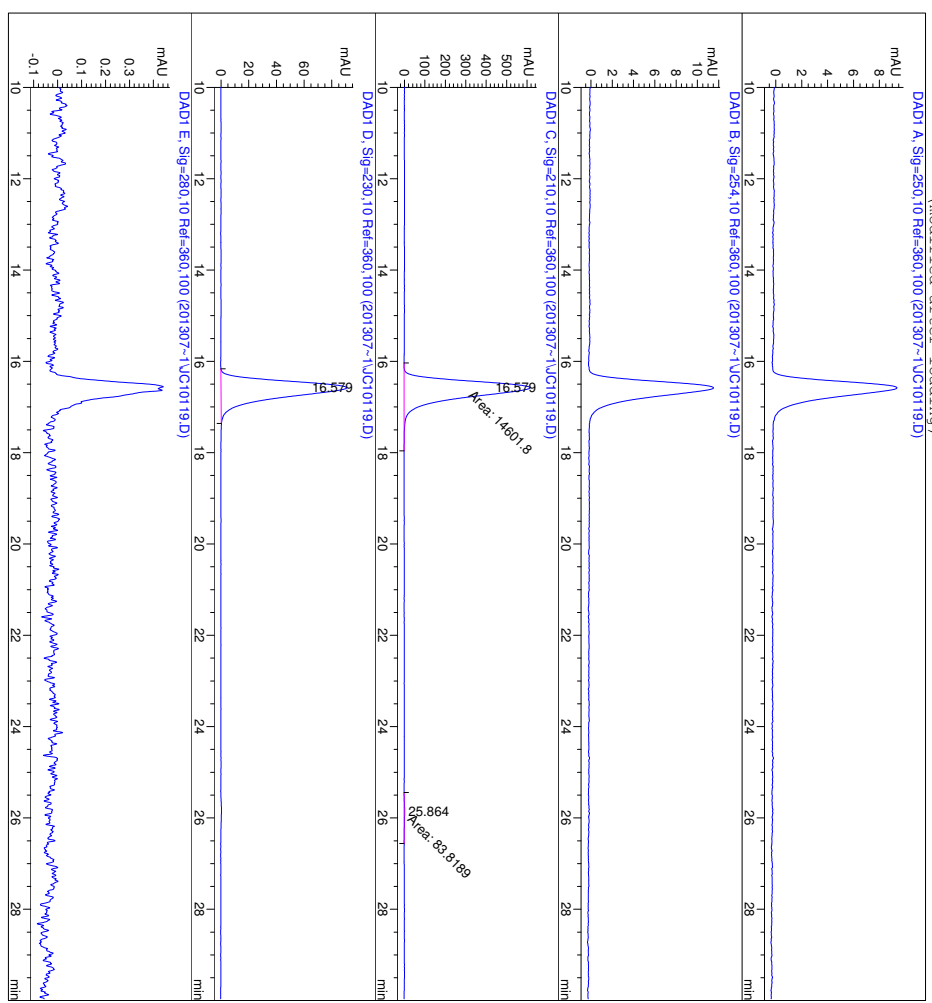

Sorted By : Signal  
 Multiplier : 1.0000  
 Dilution : 1.0000  
 Use Multiplier & Dilution Factor with ISTDs

| Area Percent Report                      |
|------------------------------------------|
| Signal 1: DADI A, Sig=250,10 Ref=360,100 |
| Signal 2: DADI B, Sig=254,10 Ref=360,100 |
| Signal 3: DADI C, Sig=210,10 Ref=360,100 |
| Signal 4: DADI D, Sig=230,10 Ref=360,100 |
| Signal 5: DADI E, Sig=280,10 Ref=360,100 |

| Peak # | RetTime [min] | Type | Width [min] | Area [mAU*s] | Height [mAU] | Area %  |
|--------|---------------|------|-------------|--------------|--------------|---------|
| 1      | 16.579        | MM   | 0.3945      | 1.46018e4    | 616.82446    | 99.4292 |
| 2      | 25.864        | MM   | 0.5283      | 83.81888     | 2.64443      | 0.5708  |

Totals : 1.46856e4 619.46889

Results obtained with enhanced integrator!  
 Signal 4: DADI D, Sig=230,10 Ref=360,100  
 Results obtained with enhanced integrator!  
 Signal 5: DADI E, Sig=280,10 Ref=360,100  
 \*\*\* End of Report \*\*\*

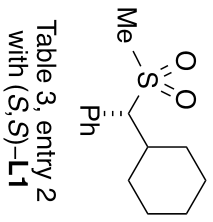

=====  
Injection Date : 7/11/2013 9:50:27 AM      Seq. Line : 2  
Sample Name : JC10177                            Location : Vial 1  
Acq. Operator : CE                                Inj : 1  
Acq. Instrument : Instrument 1                  Inj Volume : 15 µl  
Different Inj Volume from Sequence !  
Last changed : 6/28/2013 4:31:36 PM by CE      Actual Inj Volume : 5 µl  
Analysis Method : C:\HPCHEM\1\METHODS\OD-20-60.M  
                  : C:\HPCHEM\1\METHODS\OD-02-20.M  
Last changed : 7/30/2014 7:02:19 PM by MK  
                  (modified after loading)  
=====

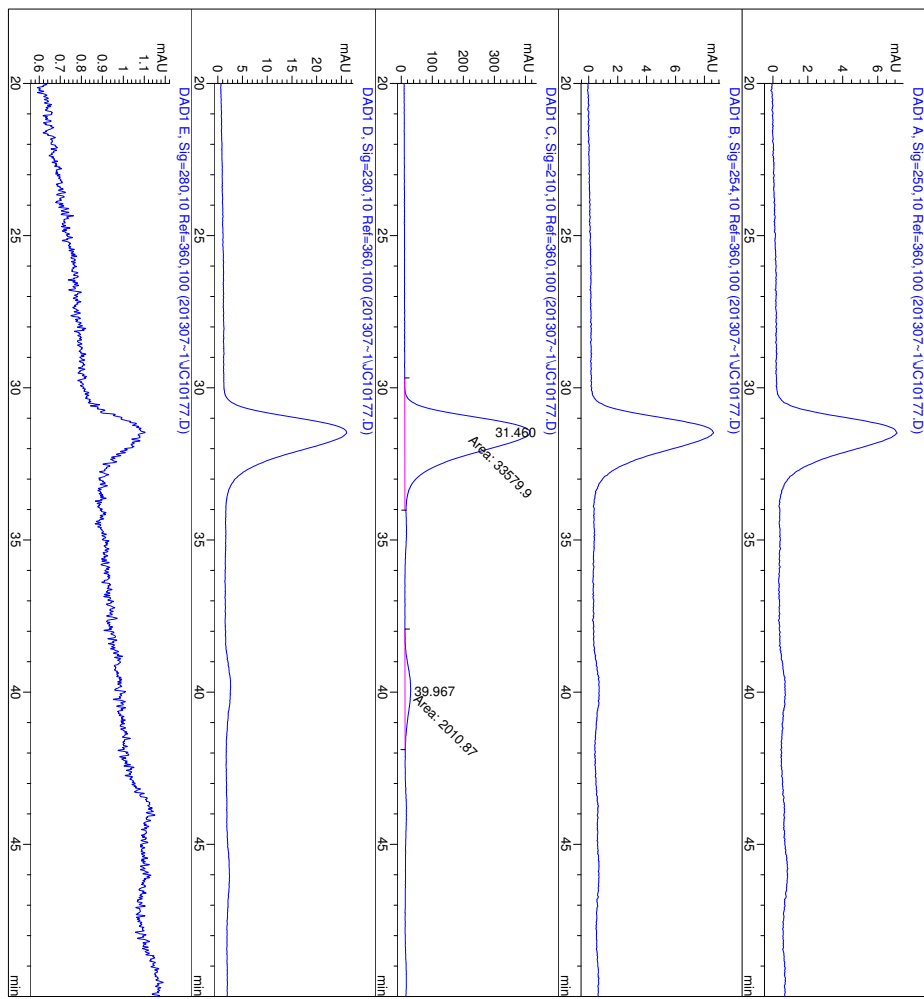

=====  
Area Percent Report  
=====

| Sorted By                                   | Signal |
|---------------------------------------------|--------|
| Multiplier                                  | 1.0000 |
| Dilution                                    | 1.0000 |
| Use Multiplier & Dilution Factor with ISTDs |        |

| Signal                                   | RetTime [min] | Width [min] | Area [mAU*s] | Height [mAU] | Area %  |
|------------------------------------------|---------------|-------------|--------------|--------------|---------|
| Signal 1: DAD1 A, Sig=250,10 Ref=360,100 | 31.460        | 1.3866      | 3.35799e4    | 403.62396    | 94.3500 |
| Signal 2: DAD1 B, Sig=254,10 Ref=360,100 | 39.967        | 1.8199      | 2010.86841   | 18.41513     | 5.6500  |
| Signal 3: DAD1 C, Sig=210,10 Ref=360,100 | 31.460        | 1.3866      | 3.35799e4    | 403.62396    | 94.3500 |
| Signal 4: DAD1 D, Sig=230,10 Ref=360,100 | 31.460        | 1.3866      | 3.35799e4    | 403.62396    | 94.3500 |
| Signal 5: DAD1 E, Sig=280,10 Ref=360,100 | 31.460        | 1.3866      | 3.35799e4    | 403.62396    | 94.3500 |

Totals : 3.55907e4 422.03910  
Results obtained with enhanced integrator!  
Signal 4: DAD1 D, Sig=230,10 Ref=360,100  
Signal 5: DAD1 E, Sig=280,10 Ref=360,100  
=====

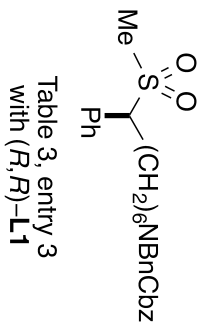

=====  
Injection Date : 7/20/2013 7:21:29 AM      Seq. Line : 30  
Sample Name : JC10181                            Location : Vial 10  
Acq. Operator : CE                                Inj : 1  
Acq. Instrument : Instrument 1                   Inj Volume : 15 µl  
Different Inj Volume from Sequence !  
Accr. Method : C:\HPCHEM\1\METHODS\OD-20-60.M  
Last changed : 6/28/2013 4:31:36 PM by CE  
Analysis Method : C:\HPCHEM\1\METHODS\AD005-40.M  
Last changed : 8/1/2014 11:39:47 PM by MK  
(modified after loading)

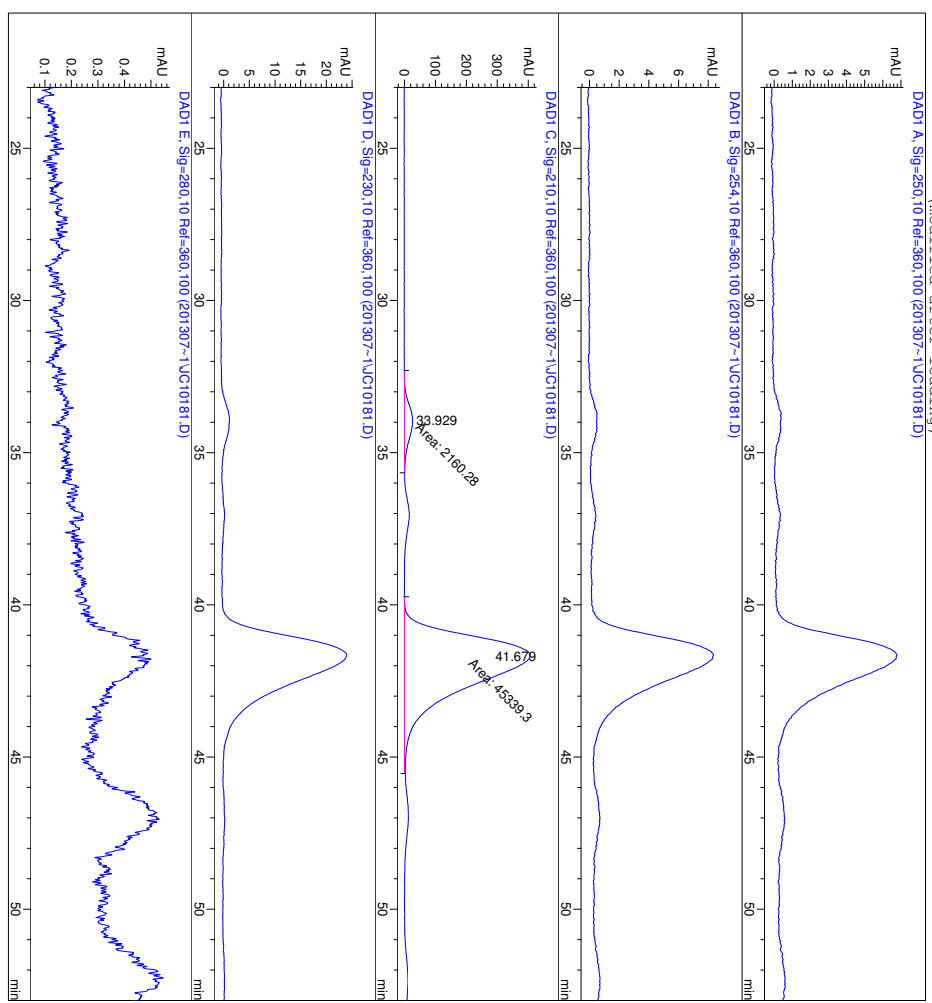

=====  
Area Percent Report  
=====

Sorted By : Signal  
Multiplier : 1.0000  
Dilution : 1.0000  
Use Multiplier & Dilution Factor with ISTDs

Signal 1: DADI A, Sig=250,10 Ref=360,100

Signal 2: DADI B, Sig=254,10 Ref=360,100

Signal 3: DADI C, Sig=210,10 Ref=360,100

| Peak # | RetTime [min] | Type | Width [min] | Area [mAU*s] | Height [mAU] | Area %  |
|--------|---------------|------|-------------|--------------|--------------|---------|
| 1      | 33.929        | MF   | 1.3461      | 2160.27637   | 26.74717     | 4.5480  |
| 2      | 41.679        | MF   | 1.8592      | 4.53393e4    | 406.43207    | 95.4520 |

Totals : 4.74996e4 433.17924

Results obtained with enhanced integrator!

Signal 4: DADI D, Sig=230,10 Ref=360,100

Signal 5: DADI E, Sig=280,10 Ref=360,100

=====  
\*\*\* End of Report \*\*\*  
=====

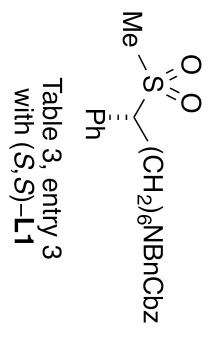

Injection Date : 8/2/2013 10:41:10 AM  
 Sample Name : PM2-20A  
 Acq. Operator : CE  
 Acq. Instrument : Instrument 1  
 Different Inj Volume from Sequence :  
 Last changed : 3/19/2012 12:43:39 PM by CE  
 Analysis Method : C:\HPCHEM\1\METHODS\IB-01-20.M  
 Last changed : 7/30/2014 7:04:50 PM by MK  
 (modified after loading)

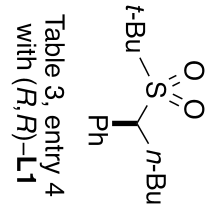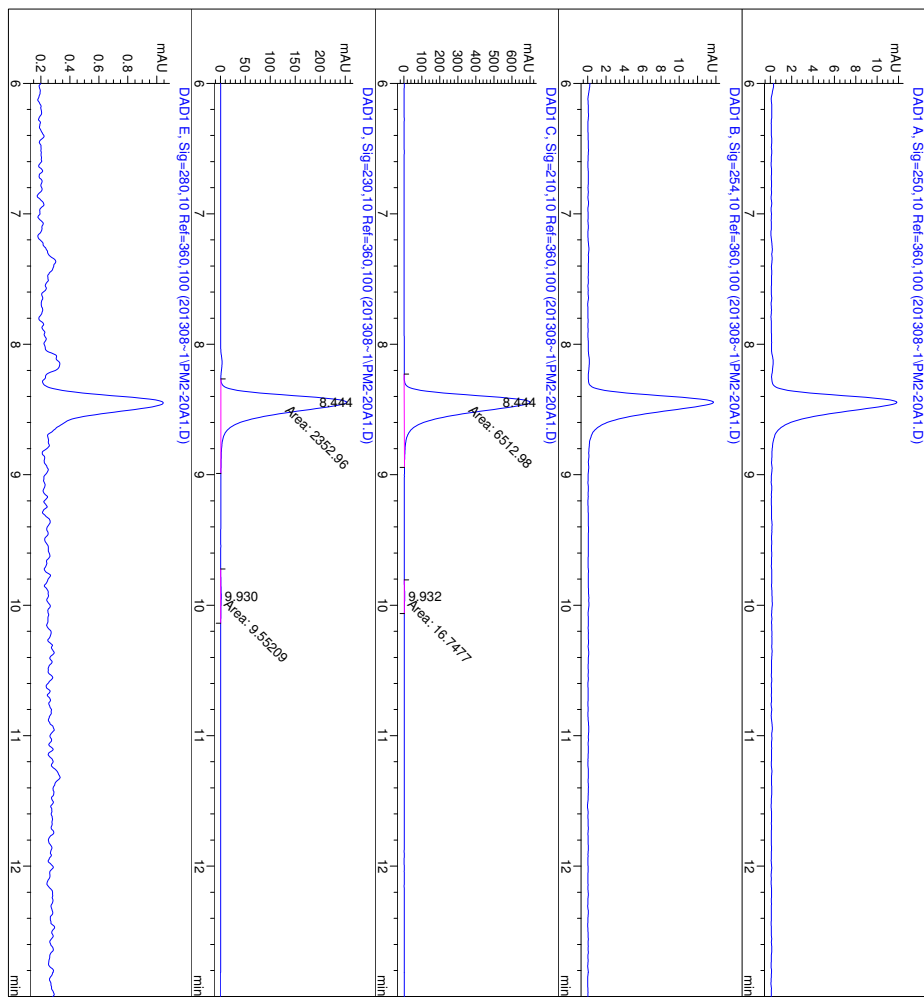

Area Percent Report

Sorted By : Signal  
 Multiplier : 1.0000  
 Dilution : 1.0000  
 Use Multiplier & Dilution Factor with ISTDs

| Signal   | RetTime [min] | Type | Width [min] | Area [mAU*s] | Height [mAU] | Area %  |
|----------|---------------|------|-------------|--------------|--------------|---------|
| Signal 1 | 8.444         | FM   | 0.1553      | 6512.97803   | 698.96423    | 99.7435 |
| Signal 2 | 9.932         | MM   | 0.1343      | 16.74774     | 2.07831      | 0.2565  |

Totals : 6529.72577 701.04255  
 Results obtained with enhanced integrator!  
 Signal 4: DADI D, Sig=230,10 Ref=360,100

| Peak # | RetTime [min] | Type | Width [min] | Area [mAU*s] | Height [mAU] | Area %  |
|--------|---------------|------|-------------|--------------|--------------|---------|
| 1      | 8.444         | FM   | 0.1553      | 2352.96094   | 252.45752    | 99.5957 |
| 2      | 9.930         | MM   | 0.1630      | 9.55209      | 9.76556e-1   | 0.4043  |

Totals : 2362.51303 253.43408  
 Results obtained with enhanced integrator!  
 Signal 5: DADI E, Sig=280,10 Ref=360,100

\*\*\* End of Report \*\*\*

Injection Date : 8/2/2013 11:02:26 AM  
 Sample Name : PM2-20B  
 Acq. Operator : CE  
 Acq. Instrument : Instrument 1  
 Different Inj Volume from Sequence : Actual Inj Volume : 15 µl  
 Inj Volume : 3 µl  
 Acq. Method : C:\HPCHEM\1\METHODS\IB-01-20.M  
 Last changed : 3/19/2012 12:43:39 PM by CE  
 Analysis Method : C:\HPCHEM\1\METHODS\AD005-40.M  
 Last changed : 8/1/2014 11:41:35 PM by MK  
 (modified after loading)

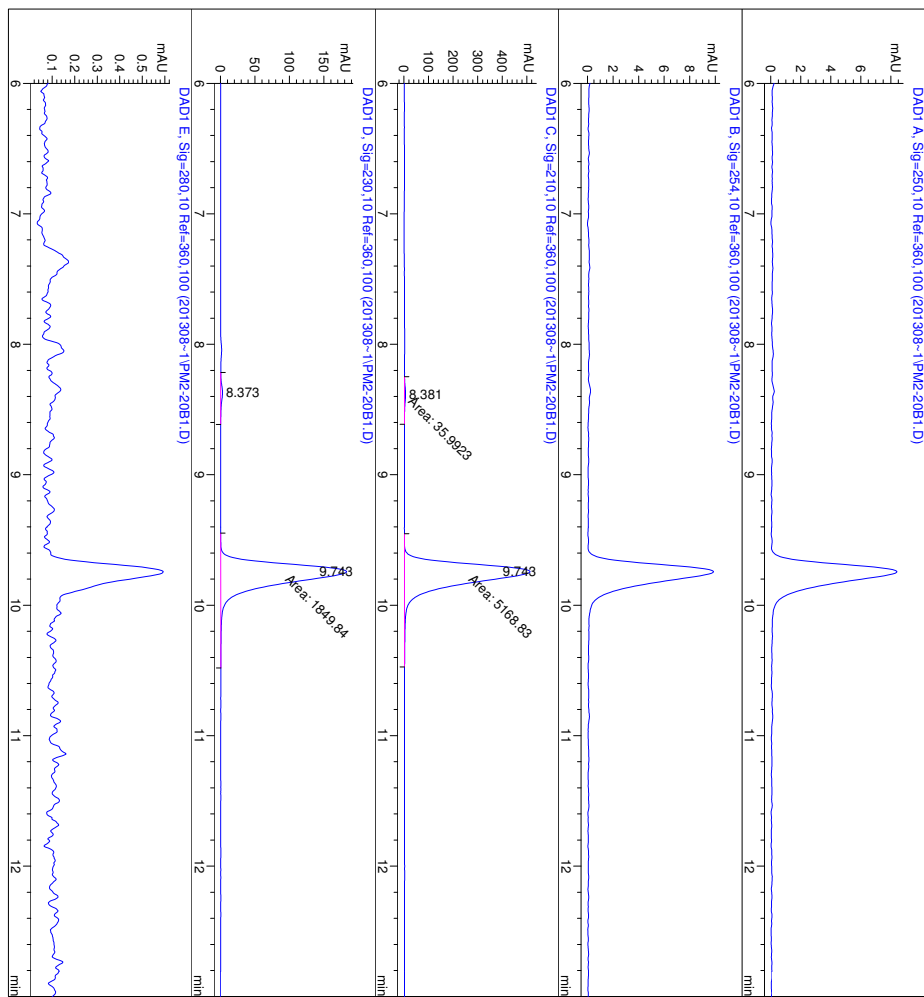

Area Percent Report

Sorted By : Signal  
 Multiplier : 1.0000  
 Dilution : 1.0000  
 Use Multiplier & Dilution Factor with ISTDs

Signal 1: DADI A, Sig=250,10 Ref=360,100

Signal 2: DADI B, Sig=254,10 Ref=360,100

Signal 3: DADI C, Sig=210,10 Ref=360,100

| Peak # | RetTime [min] | Type | Width [min] | Area [mAU*s] | Height [mAU] | Area %  |
|--------|---------------|------|-------------|--------------|--------------|---------|
| 1      | 8.381         | MM   | 0.1398      | 35.99226     | 4.28965      | 0.6915  |
| 2      | 9.743         | MM   | 0.1683      | 5168.82764   | 511.87228    | 99.3085 |

Totals : 5204.81990 516.16193

Results obtained with enhanced integrator!

Signal 4: DADI D, Sig=230,10 Ref=360,100

| Peak # | RetTime [min] | Type | Width [min] | Area [mAU*s] | Height [mAU] | Area %  |
|--------|---------------|------|-------------|--------------|--------------|---------|
| 1      | 8.373         | VB   | 0.1312      | 22.56680     | 2.60208      | 1.2052  |
| 2      | 9.743         | MM   | 0.1686      | 1849.83777   | 182.89543    | 98.7948 |

Totals : 1872.40457 185.49751

Results obtained with enhanced integrator!

Signal 5: DADI E, Sig=280,10 Ref=360,100

\*\*\* End of Report \*\*\*

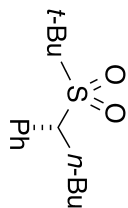

Table 3, entry 4 with (S,S)-L1

Injection Date : 12/14/2012 5:34:16 PM  
 Sample Name : JC9119A  
 Acq. Operator : CE  
 Acq. Instrument : Instrument 1  
 Different Inj Volume from Sequence : Inj Volume : 15 µl  
 Actual Inj Volume : 3 µl  
 Location : Vial 22  
 Inj : 1  
 Acq. Method : C:\HPCHEM\1\METHODS\OD-01-40.M  
 Last changed : 8/17/2010 4:39:48 PM by JTM  
 Analysis Method : C:\HPCHEM\1\METHODS\OD-02-20.M  
 Last changed : 7/30/2014 7:15:04 PM by MK  
 (modified after loading)

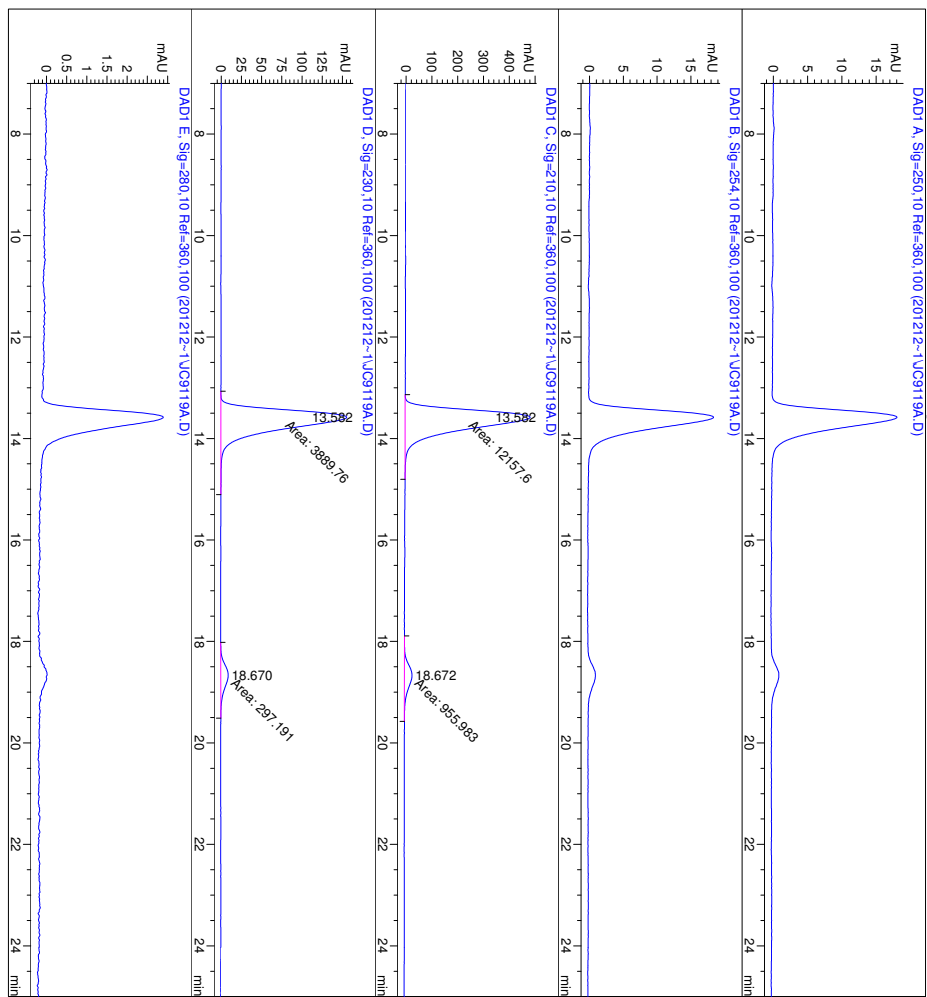

Area Percent Report  
 Sorted By : Signal  
 Multiplier : 1.0000  
 Dilution : 1.0000  
 Use Multiplier & Dilution Factor with ISTDs

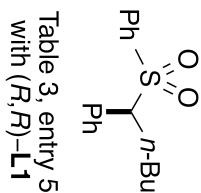

| Signal                                   | RetTime [min] | Type | Width [min] | Area [mAU*s] | Height [mAU] | Area %  |
|------------------------------------------|---------------|------|-------------|--------------|--------------|---------|
| Signal 1: DAD1 A, Sig=250,10 Ref=360,100 | 13.582        | MM   | 0.4179      | 12157.6      | 484.81223    | 92.7100 |
| Signal 2: DAD1 B, Sig=254,10 Ref=360,100 | 18.672        | MM   | 0.5410      | 955.98328    | 29.44996     | 7.2900  |
| Signal 3: DAD1 C, Sig=210,10 Ref=360,100 | 13.582        | MM   | 0.4179      | 3689.76      | 155.62090    | 92.9020 |
| Signal 4: DAD1 D, Sig=230,10 Ref=360,100 | 18.670        | MM   | 0.5358      | 297.19092    | 9.24424      | 7.0980  |

Totals : 1.31136e4 514.26218  
 Results obtained with enhanced integrator!  
 Signal 5: DAD1 E, Sig=280,10 Ref=360,100  
 Results obtained with enhanced integrator!  
 Totals : 4186.94995 164.86513

\*\*\* End of Report \*\*\*



=====  
 Injection Date : 12/14/2012 6:15:28 PM      Seq. Line : 5  
 Sample Name : JC9119B                            Location : Vial 23  
 Acq. Operator : CE                                Inj : 1  
 Acq. Instrument : Instrument 1                    Inj Volume : 15 µl  
 Different Inj Volume from Sequence 1            Actual Inj Volume : 3 µl  
 Acq. Method : C:\HPCHEM\1\METHODS\OD-01-40.M  
 Last changed : 8/17/2010 4:39:48 PM by JTM  
 Analysis Method : C:\HPCHEM\1\METHODS\AD003-40.M  
 Last changed : 8/2/2014 10:20:42 PM by MK  
 (modified after loading)  
 =====

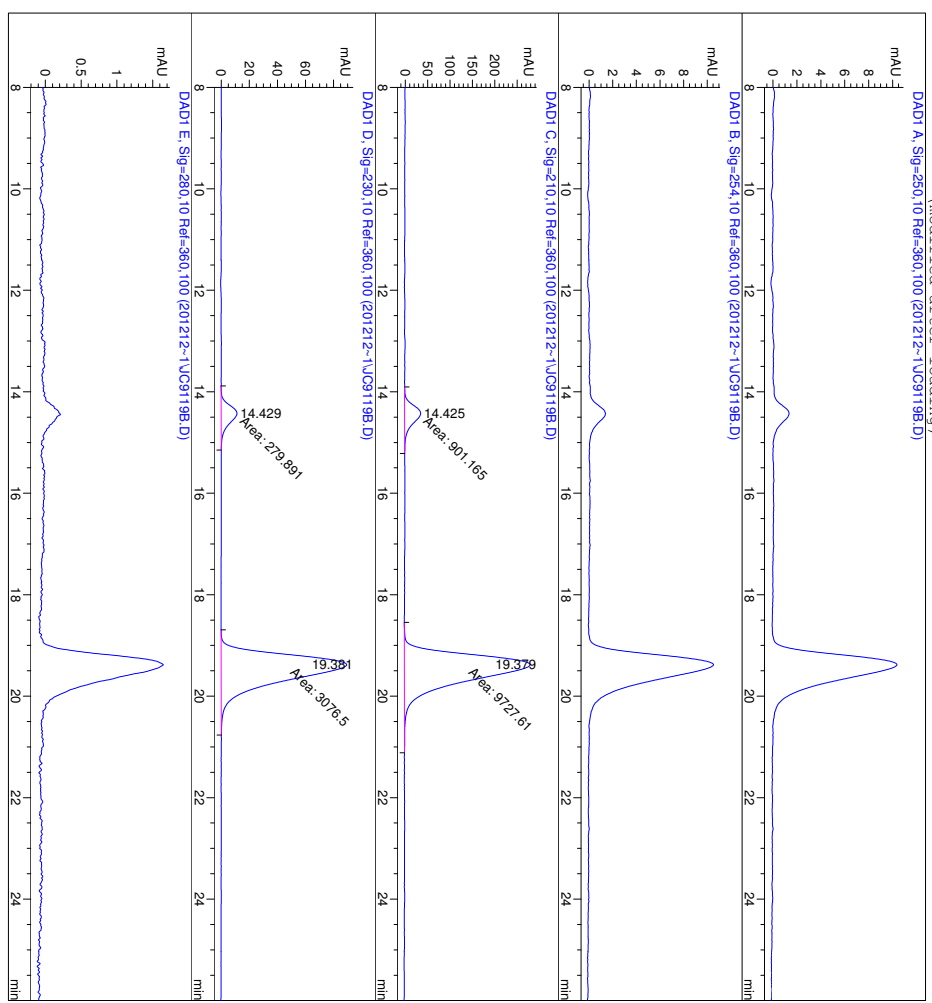

=====  
 Area Percent Report  
 =====  
 Sorted By : Signal  
 Multiplier : 1.0000  
 Dilution : 1.0000  
 Use Multiplier & Dilution Factor with ISTDs

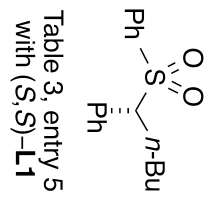

Signal 1: DAD1 A, Sig=250,10 Ref=360,100

| Peak # | RetTime [min] | Type | Width [min] | Area [mAU*s] | Height [mAU] | Area %  |
|--------|---------------|------|-------------|--------------|--------------|---------|
| 1      | 14.425        | MM   | 0.4183      | 901.16510    | 35.90579     | 8.4785  |
| 2      | 19.379        | MM   | 0.5770      | 9727.60840   | 280.98239    | 91.5215 |

Totals : 1.06288e4 316.88818

Results obtained with enhanced integrator!  
 Signal 4: DAD1 D, Sig=230,10 Ref=360,100

| Peak # | RetTime [min] | Type | Width [min] | Area [mAU*s] | Height [mAU] | Area %  |
|--------|---------------|------|-------------|--------------|--------------|---------|
| 1      | 14.429        | MM   | 0.4146      | 279.89063    | 11.25042     | 8.3390  |
| 2      | 19.381        | MM   | 0.5735      | 3076.50317   | 89.40532     | 91.6610 |

Totals : 3356.39380 100.65574

Results obtained with enhanced integrator!  
 Signal 5: DAD1 E, Sig=280,10 Ref=360,100

| Peak # | RetTime [min] | Type | Width [min] | Area [mAU*s] | Height [mAU] | Area %  |
|--------|---------------|------|-------------|--------------|--------------|---------|
| 1      | 14.429        | MM   | 0.4146      | 279.89063    | 11.25042     | 8.3390  |
| 2      | 19.381        | MM   | 0.5735      | 3076.50317   | 89.40532     | 91.6610 |

Totals : 3356.39380 100.65574

\*\*\* End of Report \*\*\*

Injection Date : 2/16/2013 5:08:58 PM  
 Sample Name : JC9225  
 Acq. Operator : CE  
 Acq. Instrument : Instrument 1  
 Different Inj Volume from Sequence : Inj Volume : 15 µl  
 Last changed : 2/16/2013 4:45:43 PM by CE  
 Analysis Method : C:\HPCHEM\1\METHODS\OD-02-30.M  
 Last changed : 7/30/2014 7:16:00 PM by MK  
 Last changed : 7/30/2014 7:16:00 PM by MK  
 (modified after loading)

Area Percent Report

Sorted By : Signal  
 Multiplier : 1.0000  
 Dilution : 1.0000  
 Use Multiplier & Dilution Factor with ISTDs

Signal 1: DAD1 A, Sig=250,10 Ref=360,100

Signal 2: DAD1 B, Sig=254,10 Ref=360,100

Signal 3: DAD1 C, Sig=210,10 Ref=360,100

| Peak # | RetTime [min] | Type | Width [min] | Area [mAU*s] | Height [mAU] | Area %  |
|--------|---------------|------|-------------|--------------|--------------|---------|
| 1      | 8.120         | MM   | 0.2662      | 1.62037e4    | 1014.59381   | 97.9659 |
| 2      | 10.117        | MM   | 0.2798      | 336.43698    | 20.03921     | 2.0341  |

Totals : 1.65402e4 1034.63302

Results obtained with enhanced integrator!

Signal 4: DAD1 D, Sig=230,10 Ref=360,100

| Peak # | RetTime [min] | Type | Width [min] | Area [mAU*s] | Height [mAU] | Area %  |
|--------|---------------|------|-------------|--------------|--------------|---------|
| 1      | 8.119         | MM   | 0.2655      | 1.16168e4    | 729.36182    | 97.8639 |
| 2      | 10.121        | MM   | 0.2835      | 253.56413    | 14.90512     | 2.1361  |

Totals : 1.18703e4 744.26694

Results obtained with enhanced integrator!

Signal 5: DAD1 E, Sig=280,10 Ref=360,100

| Peak # | RetTime [min] | Type | Width [min] | Area [mAU*s] | Height [mAU] | Area %  |
|--------|---------------|------|-------------|--------------|--------------|---------|
| 1      | 8.119         | MM   | 0.2655      | 1.16168e4    | 729.36182    | 97.8639 |
| 2      | 10.121        | MM   | 0.2835      | 253.56413    | 14.90512     | 2.1361  |

Totals : 1.18703e4 744.26694

Results obtained with enhanced integrator!

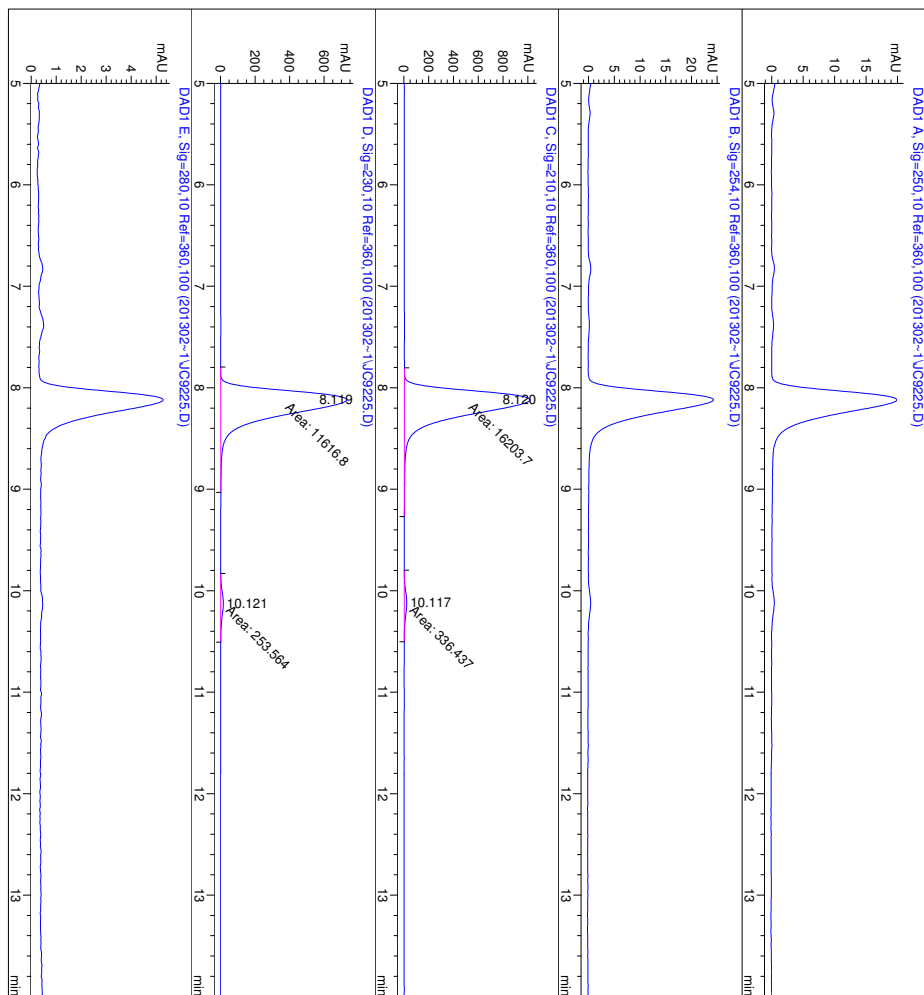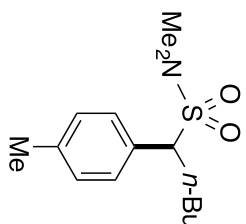

Table 4, entry 1  
 with (R,R)-L1

Injection Date : 2/16/2013 5:40:14 PM  
 Sample Name : JC9229  
 Acq. Operator : CE  
 Acq. Instrument : Instrument 1  
 Different Inj Volume from Sequence : Inj Volume : 15 µl  
 Actual Inj Volume : 5 µl  
 Acq. Method : C:\HPCHEM\1\METHODS\OD-02-30.M  
 Last changed : 2/16/2013 4:45:43 PM by CE  
 Analysis Method : C:\HPCHEM\1\METHODS\AD005-40.M  
 Last changed : 8/1/2014 11:49:11 PM by MK  
 (modified after loading)

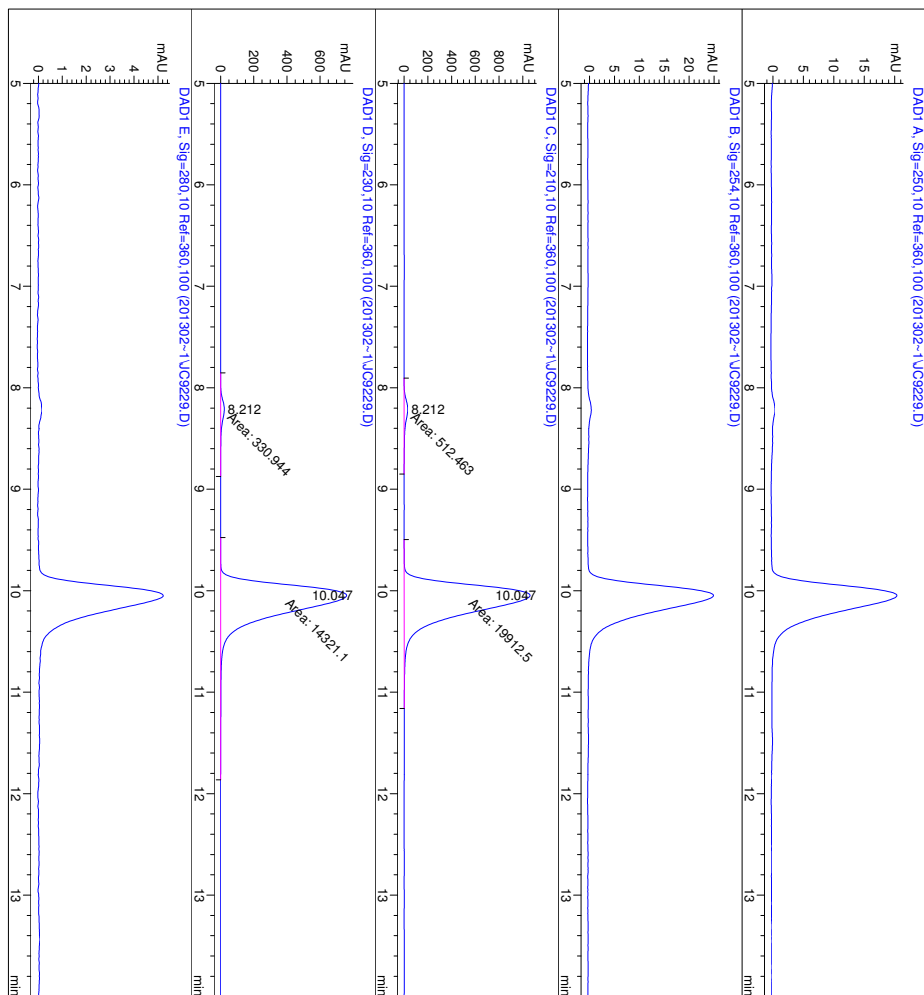

Area Percent Report  
 Sorted By : Signal  
 Multiplier : 1.0000  
 Dilution : 1.0000  
 Use Multiplier & Dilution Factor with ISTDs

| Signal                                   | Peak # | RetTime [min] | Type | Width [min] | Area [mAU*s] | Height [mAU] | Area %  |
|------------------------------------------|--------|---------------|------|-------------|--------------|--------------|---------|
| Signal 1: DADI A, Sig=250,10 Ref=360,100 | 1      | 8.212         | MM   | 0.2747      | 512.46289    | 31.09460     | 2.5090  |
| Signal 2: DADI B, Sig=254,10 Ref=360,100 | 2      | 10.047        | MM   | 0.3127      | 1.99125e4    | 1061.17505   | 97.4910 |
| Signal 3: DADI C, Sig=210,10 Ref=360,100 | 1      | 8.212         | MM   | 0.2747      | 512.46289    | 31.09460     | 2.5090  |
| Signal 4: DADI D, Sig=230,10 Ref=360,100 | 2      | 10.047        | MM   | 0.3127      | 1.99125e4    | 1061.17505   | 97.4910 |

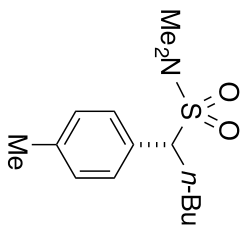

Table 4, entry 1  
 with (S,S)-L1

Injection Date : 2/11/2013 7:19:54 PM  
 Sample Name : JC9219A  
 Acq. Operator : CE  
 Acq. Instrument : Instrument 1  
 Different Inj Volume from Sequence : Inj Volume : 15 µl  
 Actual Inj Volume : 5 µl  
 Acq. Method : C:\HPCHEM\1\METHODS\OD-03-40.M  
 Last changed : 2/11/2013 7:37:52 PM by CE  
 (modified after loading)  
 Analysis Method : C:\HPCHEM\1\METHODS\OD-02-20.M  
 Last changed : 7/30/2014 7:18:31 PM by MK  
 (modified after loading)

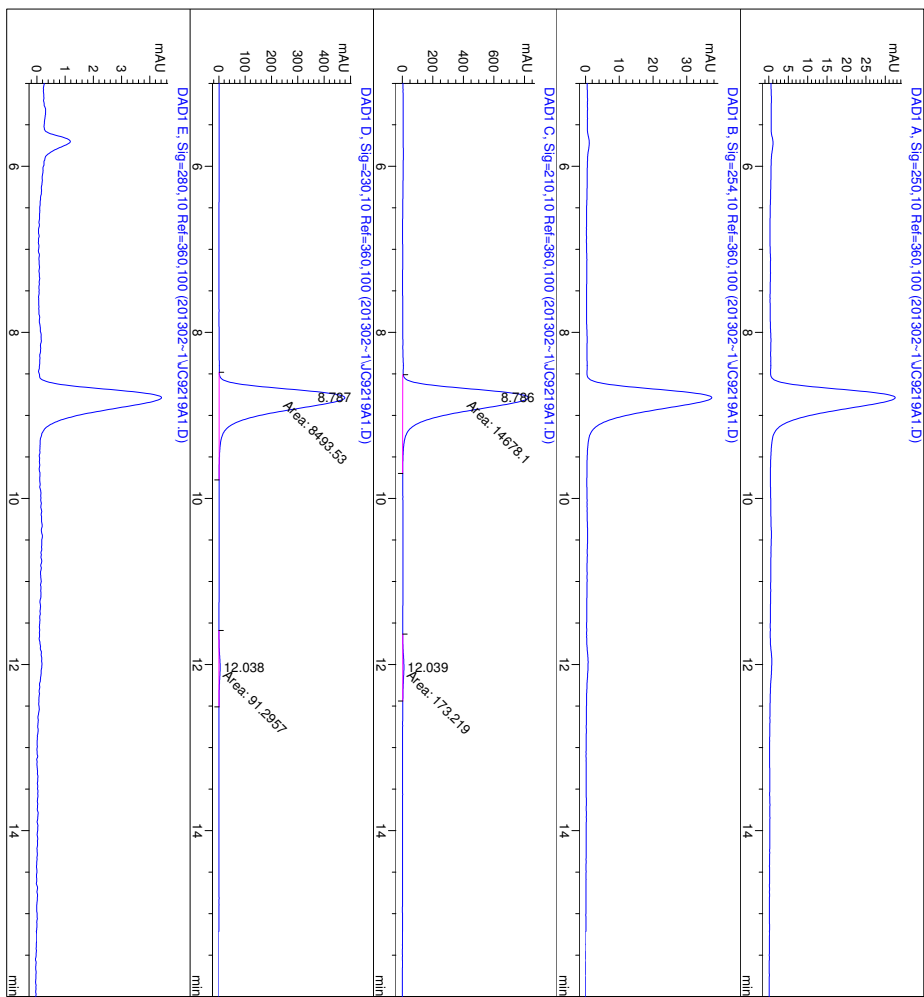

Area Percent Report  
 Sorted By : Signal  
 Multiplier : 1.0000  
 Dilution : 1.0000  
 Use Multiplier & Dilution Factor with ISTDs

| Signal                                   | RetTime [min] | Type | Width [min] | Area [mAU*s] | Height [mAU] | Area %  |
|------------------------------------------|---------------|------|-------------|--------------|--------------|---------|
| Signal 1: DADI A, Sig=250,10 Ref=360,100 | 8.786         | FM   | 0.2972      | 1.46781e4    | 823.10712    | 98.8336 |
| Signal 2: DADI B, Sig=254,10 Ref=360,100 | 12.039        | MM   | 0.3704      | 173.21939    | 7.79425      | 1.1664  |
| Signal 3: DADI C, Sig=210,10 Ref=360,100 | 12.038        | MM   | 0.3593      | 91.29572     | 4.23473      | 1.0635  |

Totals : 1.48513e4 830.90137  
 Results obtained with enhanced integrator!  
 Signal 4: DADI D, Sig=230,10 Ref=360,100  
 Results obtained with enhanced integrator!  
 Signal 5: DADI E, Sig=280,10 Ref=360,100  
 Results obtained with enhanced integrator!

| Peak # | RetTime [min] | Type | Width [min] | Area [mAU*s] | Height [mAU] | Area %  |
|--------|---------------|------|-------------|--------------|--------------|---------|
| 1      | 8.787         | FM   | 0.2959      | 8493.53320   | 478.45062    | 98.9365 |
| 2      | 12.038        | MM   | 0.3593      | 91.29572     | 4.23473      | 1.0635  |

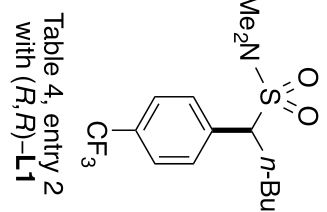

Injection Date : 2/11/2013 7:51:20 PM  
 Sample Name : JC9219B  
 Acq. Operator : CE  
 Acq. Instrument : Instrument 1  
 Different Inj Volume from Sequence : Inj Volume : 15 µl  
 Actual Inj Volume : 5 µl  
 Acq. Method : C:\HPCHEM\1\METHODS\NOD-03-30.M  
 Last changed : 12/31/2012 2:58:25 PM by CE  
 Analysis Method : C:\HPCHEM\1\METHODS\AD005-40.M  
 Last changed : 8/1/2014 11:50:49 PM by MK  
 (modified after loading)

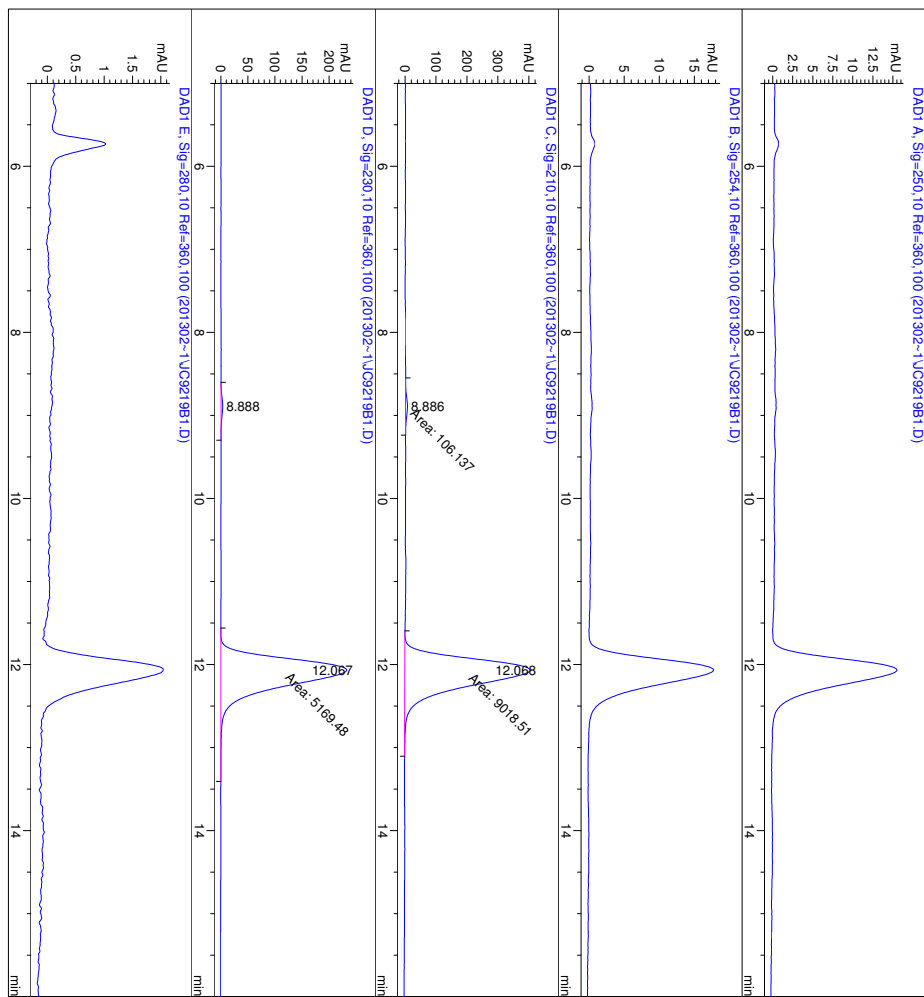

Area Percent Report  
 Sorted By : Signal  
 Multiplier : 1.0000  
 Dilution : 1.0000  
 Use Multiplier & Dilution Factor with ISTDs

| Signal                                   | RetTime [min] | Type | Width [min] | Area [mAU*s] | Height [mAU] | Area %  |
|------------------------------------------|---------------|------|-------------|--------------|--------------|---------|
| Signal 1: DAD1 A, Sig=250,10 Ref=360,100 | 8.886         | PP   | 0.2387      | 46.58376     | 2.97409      | 0.1831  |
| Signal 2: DAD1 B, Sig=254,10 Ref=360,100 | 12.068        | MM   | 0.3708      | 5169.47754   | 232.32732    | 98.1069 |
| Signal 3: DAD1 C, Sig=210,10 Ref=360,100 | 12.067        | MM   | 0.3709      | 9018.51172   | 405.22449    | 98.8368 |
| Totals :                                 |               |      |             | 9124.64835   | 411.41491    |         |

Results obtained with enhanced integrator!

Signal 4: DAD1 D, Sig=230,10 Ref=360,100

| Peak #   | RetTime [min] | Type | Width [min] | Area [mAU*s] | Height [mAU] | Area %  |
|----------|---------------|------|-------------|--------------|--------------|---------|
| 1        | 8.888         | PP   | 0.2387      | 46.58376     | 2.97409      | 0.1831  |
| 2        | 12.067        | MM   | 0.3708      | 5169.47754   | 232.32732    | 98.1069 |
| Totals : |               |      |             | 5216.06130   | 235.30141    |         |

Results obtained with enhanced integrator!

Signal 5: DAD1 E, Sig=280,10 Ref=360,100

\*\*\* End of Report \*\*\*

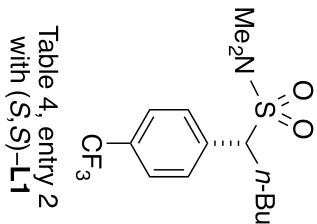

Injection Date : 8/2/2014 11:04:39 AM  
 Sample Name : JC12077A  
 Acq. Operator : MK  
 Acq. Instrument : Instrument 1  
 Different Inj Volume from Sequence : Actual Inj Volume : 5 µl  
 Last changed : 12/28/2013 3:19:26 PM by MK  
 Analysis Method : C:\HPCHEM\1\METHODS\A0005-40.M  
 Last changed : 8/2/2014 12:57:50 PM by MK  
 (modified after loading)

Sorted By : Signal  
 Multiplier : 1.0000  
 Dilution : 1.0000  
 Use Multiplier & Dilution Factor with ISTDs

Signal 1: DAD1 A, Sig=250,10 Ref=360,100

| Peak # | RetTime [min] | Type | Width [min] | Area [mAU*s] | Height [mAU] | Area %  |
|--------|---------------|------|-------------|--------------|--------------|---------|
| 1      | 8.670         | MM   | 0.2815      | 1.39820e4    | 827.70404    | 98.6305 |
| 2      | 11.410        | MM   | 0.3566      | 194.14923    | 9.07509      | 1.3695  |

Totals : 1.41762e4 836.77913

Table 4, entry 3  
 with (R,R)-L1

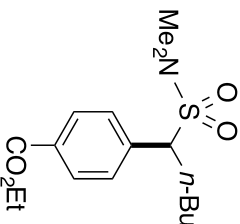

Signal 2: DAD1 B, Sig=254,10 Ref=360,100

| Peak # | RetTime [min] | Type | Width [min] | Area [mAU*s] | Height [mAU] | Area %  |
|--------|---------------|------|-------------|--------------|--------------|---------|
| 1      | 8.670         | MM   | 0.2817      | 8988.77344   | 531.88464    | 98.6412 |
| 2      | 11.407        | MM   | 0.3539      | 123.82027    | 5.83146      | 1.3588  |

Totals : 9112.59371 537.71610

Signal 3: DAD1 C, Sig=210,10 Ref=360,100

| Peak # | RetTime [min] | Type | Width [min] | Area [mAU*s] | Height [mAU] | Area %  |
|--------|---------------|------|-------------|--------------|--------------|---------|
| 1      | 8.669         | MM   | 0.2922      | 7836.80811   | 447.05707    | 98.6123 |
| 2      | 11.389        | MM   | 0.3057      | 110.27897    | 6.01225      | 1.3877  |

Totals : 7947.08707 453.06932

Signal 4: DAD1 D, Sig=230,10 Ref=360,100

| Peak # | RetTime [min] | Type | Width [min] | Area [mAU*s] | Height [mAU] | Area %  |
|--------|---------------|------|-------------|--------------|--------------|---------|
| 1      | 8.671         | MM   | 0.2825      | 1.62668e4    | 959.65015    | 98.6183 |
| 2      | 11.422        | MM   | 0.3601      | 227.91589    | 10.54932     | 1.3817  |

Totals : 1.64948e4 970.19947

Signal 5: DAD1 E, Sig=280,10 Ref=360,100

| Peak # | RetTime [min] | Type | Width [min] | Area [mAU*s] | Height [mAU] | Area %  |
|--------|---------------|------|-------------|--------------|--------------|---------|
| 1      | 8.671         | MM   | 0.2779      | 1236.76501   | 74.16629     | 98.7732 |
| 2      | 11.416        | MM   | 0.3130      | 15.36111     | 8.18057e-1   | 1.2268  |

Totals : 1252.12613 74.98435

Results obtained with enhanced integrator!  
 \*\*\* End of Report \*\*\*

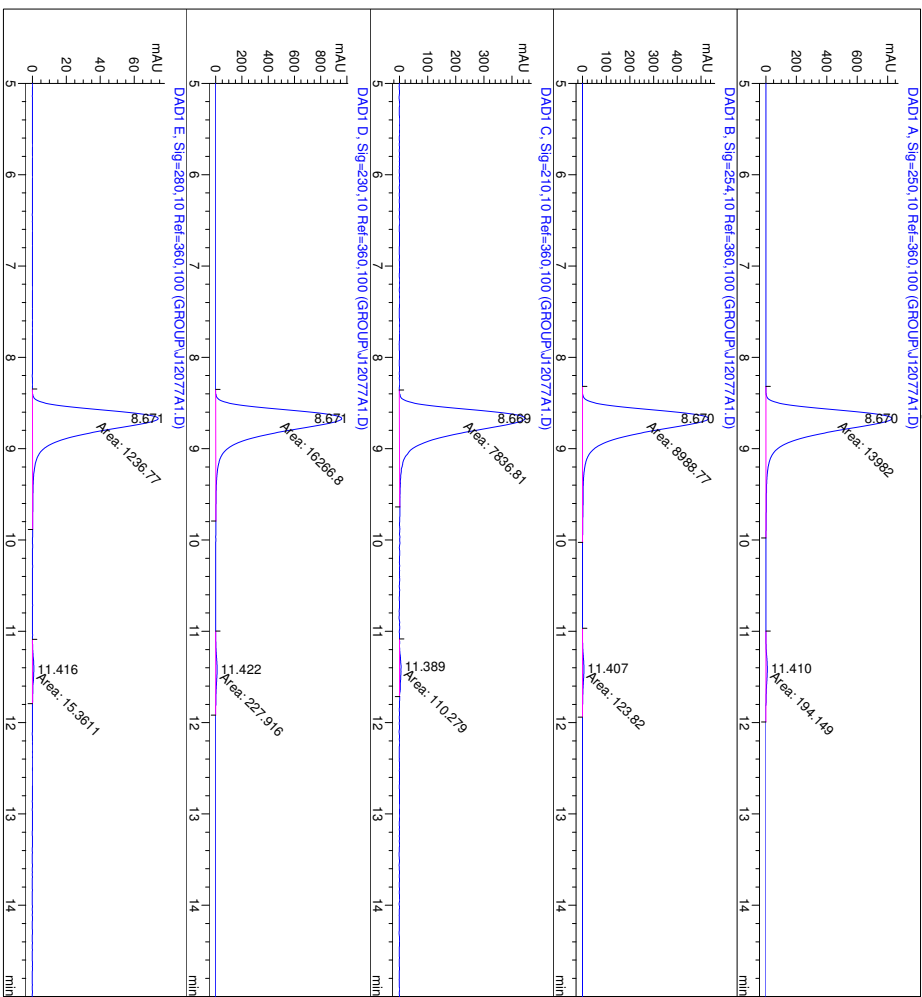

Injection Date : 8/2/2014 11:46:00 AM  
 Sample Name : JCI2077B  
 Acq. Operator : MK  
 Acq. Instrument : Instrument 1  
 Different Inj Volume from Sequence : Actual Inj Volume : 5 µl  
 Last changed : C:\HPCHEM\1\METHODS\NOD-05-40.M  
 Analysis Method : C:\HPCHEM\1\METHODS\NOD05-40.M  
 Last changed : 8/2/2014 12:57:50 PM by MK  
 (modified after loading)

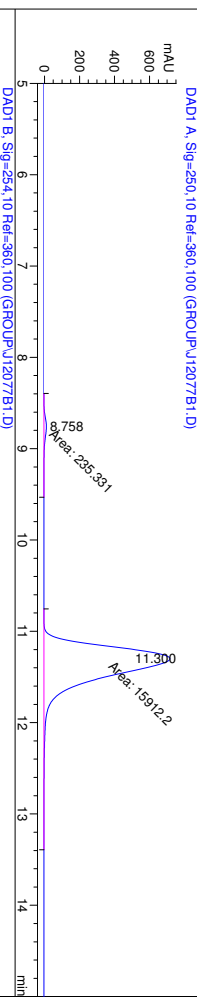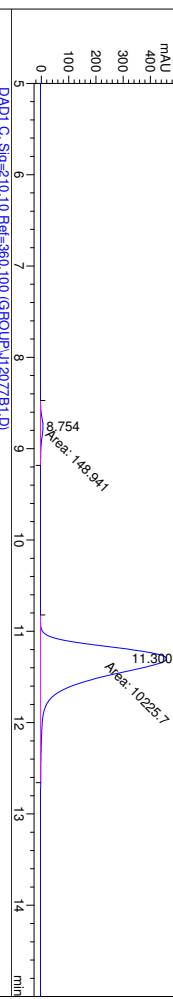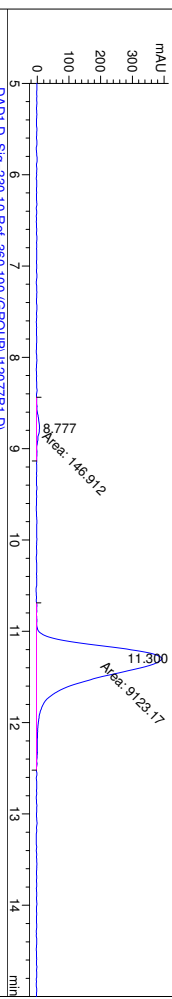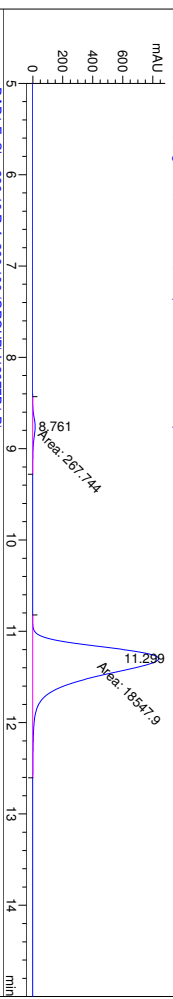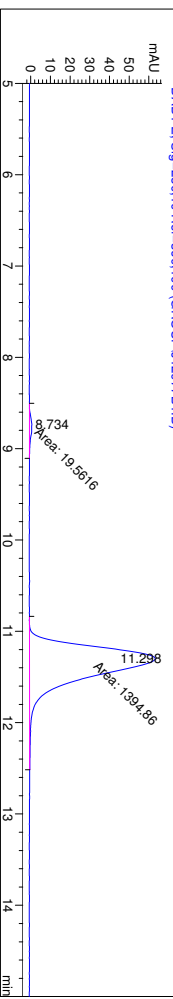

Area Percent Report

Sorted By : Signal  
 Multiplier : 1.0000  
 Dilution : 1.0000  
 Use Multiplier & Dilution Factor with ISTDs

| Signal                                   | Peak RetTime [min] | Width [min] | Area [mAU*s] | Height [mAU] | Area %  |
|------------------------------------------|--------------------|-------------|--------------|--------------|---------|
| Signal 1: DADI A, Sig=250.10 Ref=360.100 | 1                  | 8.758       | 235.33102    | 14.16449     | 1.4574  |
|                                          | 2                  | 11.300      | 1.59122e4    | 719.25024    | 98.5426 |
| Totals :                                 |                    |             | 1.61475e4    | 733.41473    |         |
| Signal 2: DADI B, Sig=254.10 Ref=360.100 | 1                  | 8.754       | 148.94130    | 9.09059      | 1.4356  |
|                                          | 2                  | 11.300      | 1.02257e4    | 462.43088    | 98.5644 |
| Totals :                                 |                    |             | 1.03746e4    | 471.52147    |         |
| Signal 3: DADI C, Sig=210.10 Ref=360.100 | 1                  | 8.777       | 146.91231    | 9.21852      | 1.5848  |
|                                          | 2                  | 11.300      | 0.38311923   | 396.85388    | 98.4152 |
| Totals :                                 |                    |             | 9270.08516   | 406.07240    |         |
| Signal 4: DADI D, Sig=230.10 Ref=360.100 | 1                  | 8.761       | 267.74371    | 16.69801     | 1.4230  |
|                                          | 2                  | 11.299      | 1.85479e4    | 840.07916    | 98.5770 |
| Totals :                                 |                    |             | 1.88156e4    | 856.77717    |         |
| Signal 5: DADI E, Sig=280.10 Ref=360.100 | 1                  | 8.734       | 19.56164     | 1.24219      | 1.3830  |
|                                          | 2                  | 11.298      | 0.363561394  | 63.93124     | 98.6170 |
| Totals :                                 |                    |             | 1414.41723   | 65.17344     |         |

Table 4, entry 3  
 with (S,S)-L1

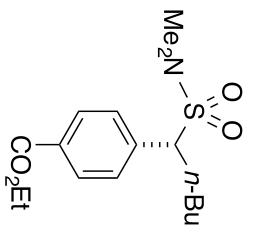

Injection Date : 1/24/2013 2:01:50 PM  
 Sample Name : JC9171  
 Acq. Operator : CE  
 Acq. Instrument : Instrument 1  
 Different Inj Volume from Sequence : Actual Inj Volume : 15 µl  
 Inj Volume : 5 µl  
 Acq. Method : C:\HPCHEM\1\METHODS\NOD-03-30.M  
 Last changed : 12/31/2012 2:58:25 PM by CE  
 Analysis Method : C:\HPCHEM\1\METHODS\AD005-40.M  
 Last changed : 8/2/2014 10:57:44 PM by MK  
 (modified after loading)

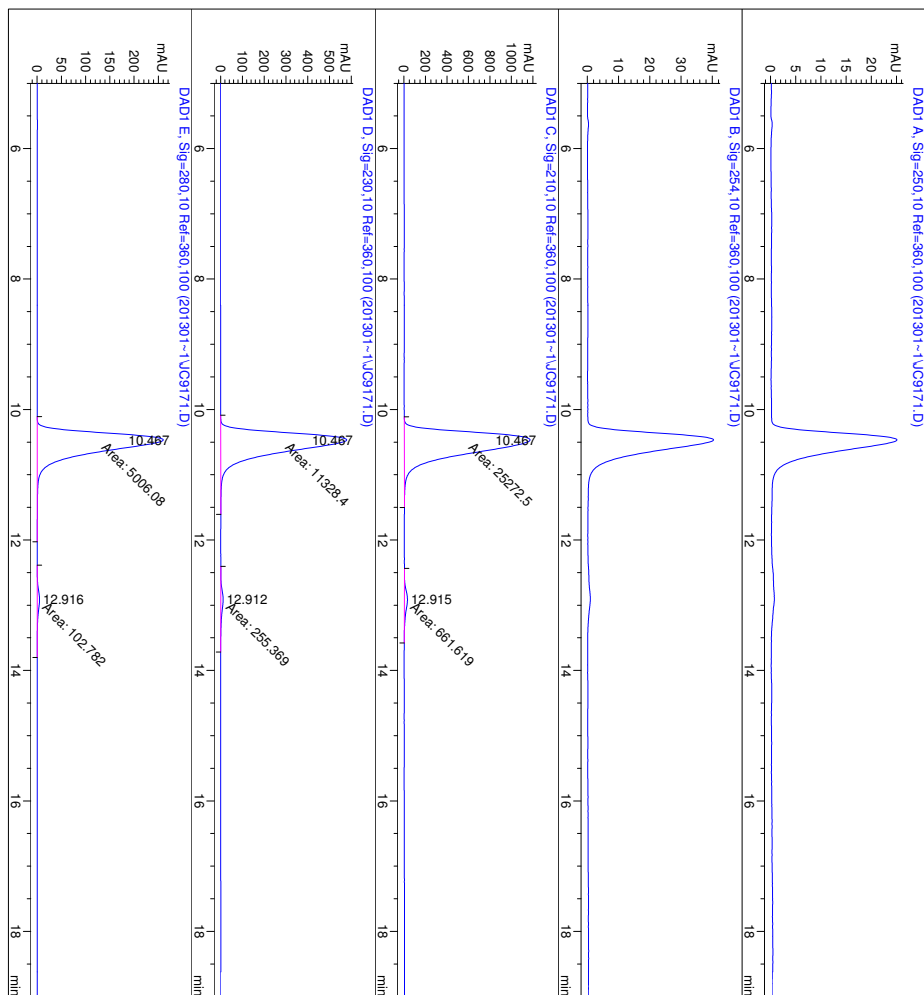

Area Percent Report  
 Sorted By : Signal  
 Multiplier : 1.0000  
 Dilution : 1.0000  
 Use Multiplier & Dilution Factor with ISTDs

| Signal                                   | Peak # | RetTime [min] | Type | Width [min] | Area [mAU*s] | Height [mAU] | Area %  |
|------------------------------------------|--------|---------------|------|-------------|--------------|--------------|---------|
| Signal 1: DAD1 A, Sig=250,10 Ref=360,100 | 1      | 10.467        | MM   | 0.3264      | 1.13284e4    | 578.50757    | 97.7955 |
|                                          | 2      | 12.916        | MM   | 0.3720      | 255.36906    | 10.87842     | 2.2045  |
| Signal 2: DAD1 B, Sig=254,10 Ref=360,100 | 1      | 10.467        | MM   | 0.3598      | 2.52725e4    | 1170.62231   | 97.4488 |
|                                          | 2      | 12.916        | MM   | 0.3802      | 661.61938    | 29.00374     | 2.5512  |
| Signal 3: DAD1 C, Sig=210,10 Ref=360,100 | 1      | 10.467        | MM   | 0.3209      | 5006.08350   | 260.03439    | 97.9882 |
|                                          | 2      | 12.916        | MM   | 0.3720      | 102.78178    | 4.60473      | 2.0118  |

Totals : 2.59342e4 1199.62605  
 Results obtained with enhanced integrator!  
 Signal 4: DAD1 D, Sig=230,10 Ref=360,100  
 Peak RetTime Type Width Area Height Area %  
 # [min] [min] [mAU\*s] [mAU] %  
 1 10.467 MM 0.3264 1.13284e4 578.50757 97.7955  
 2 12.916 MM 0.3912 255.36906 10.87842 2.2045  
 Totals : 1.15838e4 589.38598  
 Results obtained with enhanced integrator!  
 Signal 5: DAD1 E, Sig=280,10 Ref=360,100  
 Peak RetTime Type Width Area Height Area %  
 # [min] [min] [mAU\*s] [mAU] %  
 1 10.467 MM 0.3209 5006.08350 260.03439 97.9882  
 2 12.916 MM 0.3720 102.78178 4.60473 2.0118  
 Totals : 5108.86527 264.63913  
 Results obtained with enhanced integrator!  
 \*\*\* End of Report \*\*\*

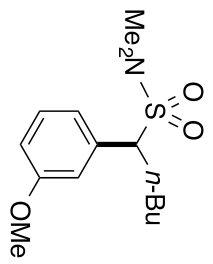

Table 4, entry 4 with (R,R)-L1



Injection Date : 1/17/2013 6:11:02 PM  
 Sample Name : JC9159B  
 Acq. Operator : CE  
 Acq. Instrument : Instrument 1  
 Different Inj Volume from Sequence : Actual Inj Volume : 5 µl  
 Last changed : 12/31/2012 2:58:25 PM by CE  
 Analysis Method : C:\HPCHEM\1\METHODS\A0005-40.M  
 Last changed : 8/1/2014 11:54:28 PM by MK  
 (modified after loading)

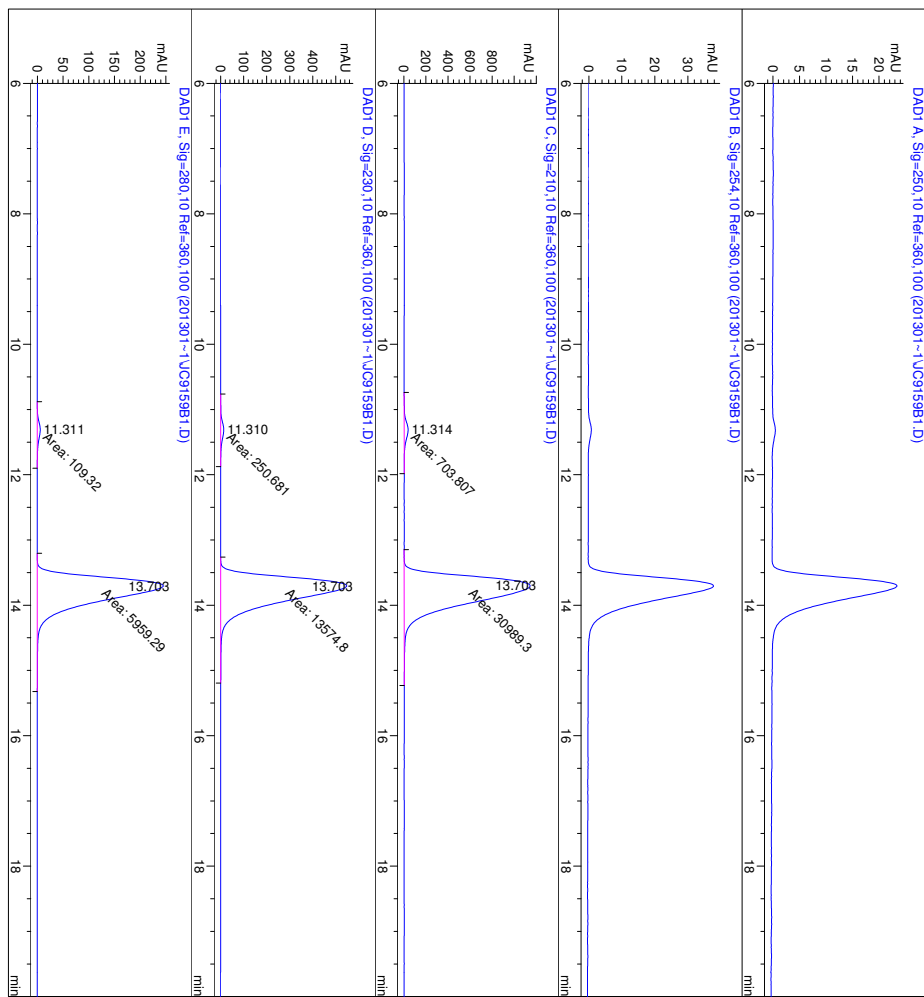

Area Percent Report

Sorted By : Signal  
 Multiplier : 1.0000  
 Dilution : 1.0000  
 Use Multiplier & Dilution Factor with ISTDs

Signal 1: DAD1 A, Sig=250,10 Ref=360,100

Signal 2: DAD1 B, Sig=254,10 Ref=360,100

Signal 3: DAD1 C, Sig=210,10 Ref=360,100

| Peak # | RetTime [min] | Type | Width [min] | Area [mAU*s] | Height [mAU] | Area %  |
|--------|---------------|------|-------------|--------------|--------------|---------|
| 1      | 11.314        | MM   | 0.3282      | 703.80688    | 35.73879     | 2.2207  |
| 2      | 13.703        | MM   | 0.4525      | 3.09893e4    | 1141.28613   | 97.7793 |

Totals : 3.16931e4 1177.02492

Results obtained with enhanced integrator!

Signal 4: DAD1 D, Sig=230,10 Ref=360,100

| Peak # | RetTime [min] | Type | Width [min] | Area [mAU*s] | Height [mAU] | Area %  |
|--------|---------------|------|-------------|--------------|--------------|---------|
| 1      | 11.310        | MM   | 0.3180      | 250.68091    | 13.13707     | 1.8132  |
| 2      | 13.703        | MM   | 0.4130      | 1.35748e4    | 547.84503    | 98.1868 |

Totals : 1.38255e4 560.98210

Results obtained with enhanced integrator!

Signal 5: DAD1 E, Sig=280,10 Ref=360,100

| Peak # | RetTime [min] | Type | Width [min] | Area [mAU*s] | Height [mAU] | Area %  |
|--------|---------------|------|-------------|--------------|--------------|---------|
| 1      | 11.311        | MM   | 0.3191      | 109.32001    | 5.70986      | 1.8014  |
| 2      | 13.703        | MM   | 0.4053      | 5959.28662   | 245.05873    | 98.1986 |

Totals : 6068.60663 250.76859

Results obtained with enhanced integrator!

\*\*\* End of Report \*\*\*

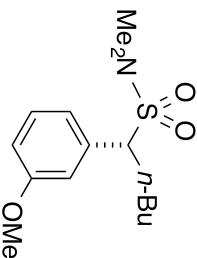

Table 4, entry 4  
 with (S,S)-L1

Injection Date : 8/5/2013 11:54:59 PM  
 Sample Name : JCI0223A  
 Acq. Operator : MK  
 Acq. Instrument : Instrument 1  
 Different Inj Volume from Sequence : Actual Inj Volume : 5 µl  
 Last changed : 4/7/2011 5:40:42 PM by CC  
 Analysis Method : C:\HPCHEM\1\METHODS\AS-05-40.M  
 Last changed : 7/30/2014 7:21:45 PM by MK  
 (modified after loading)

=====  
 Area Percent Report  
 =====  
 Sorted By : Signal  
 Multiplier : 1.0000  
 Dilution : 1.0000  
 Use Multiplier & Dilution Factor with ISTDs

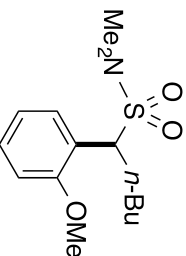

Table 4, entry 5  
 with (R,R)-L1

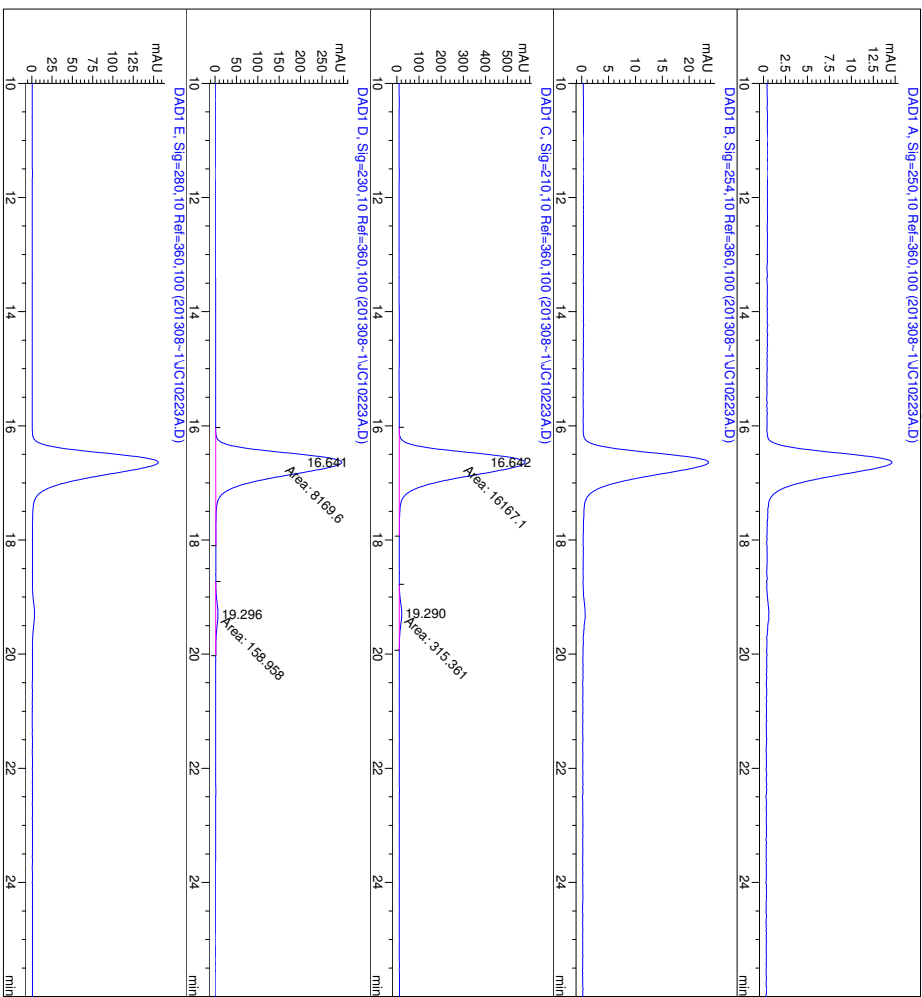

| Signal                                     | Peak # | RetTime [min] | Type | Width [min] | Area [mAU*s] | Height [mAU] | Area %  |
|--------------------------------------------|--------|---------------|------|-------------|--------------|--------------|---------|
| Signal 1: DADI A, Sig=250,10 Ref=360,100   | 1      | 16.642        | MM   | 0.4739      | 1.61671e4    | 568.63507    | 98.0867 |
|                                            | 2      | 19.290        | MM   | 0.4751      | 315.36053    | 11.06335     | 1.9133  |
| Totals : 1.64825e4 579.69842               |        |               |      |             |              |              |         |
| Results obtained with enhanced integrator! |        |               |      |             |              |              |         |
| Signal 4: DADI D, Sig=230,10 Ref=360,100   |        |               |      |             |              |              |         |
| Signal 3: DADI C, Sig=210,10 Ref=360,100   | 1      | 16.641        | MM   | 0.4629      | 8169.60059   | 294.14471    | 98.0914 |
|                                            | 2      | 19.296        | MM   | 0.5049      | 158.95808    | 5.24689      | 1.9086  |
| Totals : 8328.55867 299.39160              |        |               |      |             |              |              |         |
| Results obtained with enhanced integrator! |        |               |      |             |              |              |         |
| Signal 5: DADI E, Sig=280,10 Ref=360,100   |        |               |      |             |              |              |         |

\*\*\* End of Report \*\*\*

Injection Date : 8/6/2013 12:36:17 AM  
 Sample Name : JCI0223B  
 Acq. Operator : MK  
 Acq. Instrument : Instrument 1  
 Different Inj Volume from Sequence :  
 Last changed : 4/7/2011 5:40:42 PM by CC  
 Analysis Method : C:\HPCHEM\1\METHODS\AS-05-40.M  
 Last changed : 8/1/2014 11:56:57 PM by MK  
 (modified after loading)

Area Percent Report

Sorted By : Signal  
 Multiplier : 1.0000  
 Dilution : 1.0000  
 Use Multiplier & Dilution Factor with ISTDs

Signal 1: DAD1 A, Sig=250,10 Ref=360,100

Signal 2: DAD1 B, Sig=254,10 Ref=360,100

Signal 3: DAD1 C, Sig=210,10 Ref=360,100

| Peak # | RetTime [min] | Type | Width [min] | Area [mAU*s] | Height [mAU] | Area %  |
|--------|---------------|------|-------------|--------------|--------------|---------|
| 1      | 16.717        | MM   | 0.4488      | 433.83279    | 16.11137     | 2.1630  |
| 2      | 19.053        | MM   | 0.5754      | 1.96231e4    | 568.36749    | 97.8370 |

Totals : 2.00569e4 584.47886

Results obtained with enhanced integrator!

Signal 4: DAD1 D, Sig=230,10 Ref=360,100

| Peak # | RetTime [min] | Type | Width [min] | Area [mAU*s] | Height [mAU] | Area %  |
|--------|---------------|------|-------------|--------------|--------------|---------|
| 1      | 16.722        | MM   | 0.4358      | 196.73267    | 7.52359      | 1.9765  |
| 2      | 19.050        | MM   | 0.5650      | 9756.66211   | 287.81458    | 98.0235 |

Totals : 9953.39478 295.33817

Results obtained with enhanced integrator!

Signal 5: DAD1 E, Sig=280,10 Ref=360,100

| Peak # | RetTime [min] | Type | Width [min] | Area [mAU*s] | Height [mAU] | Area %  |
|--------|---------------|------|-------------|--------------|--------------|---------|
| 1      | 16.730        | BP   | 0.3569      | 92.86021     | 3.75030      | 1.8070  |
| 2      | 19.050        | BB   | 0.5188      | 5045.99463   | 150.64299    | 98.1930 |

Totals : 5138.85484 154.39329

Results obtained with enhanced integrator!

\*\*\* End of Report \*\*\*

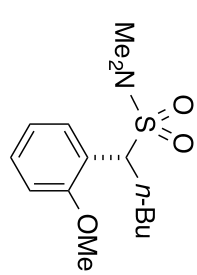

Table 4, entry 5  
with (S,S)-L1

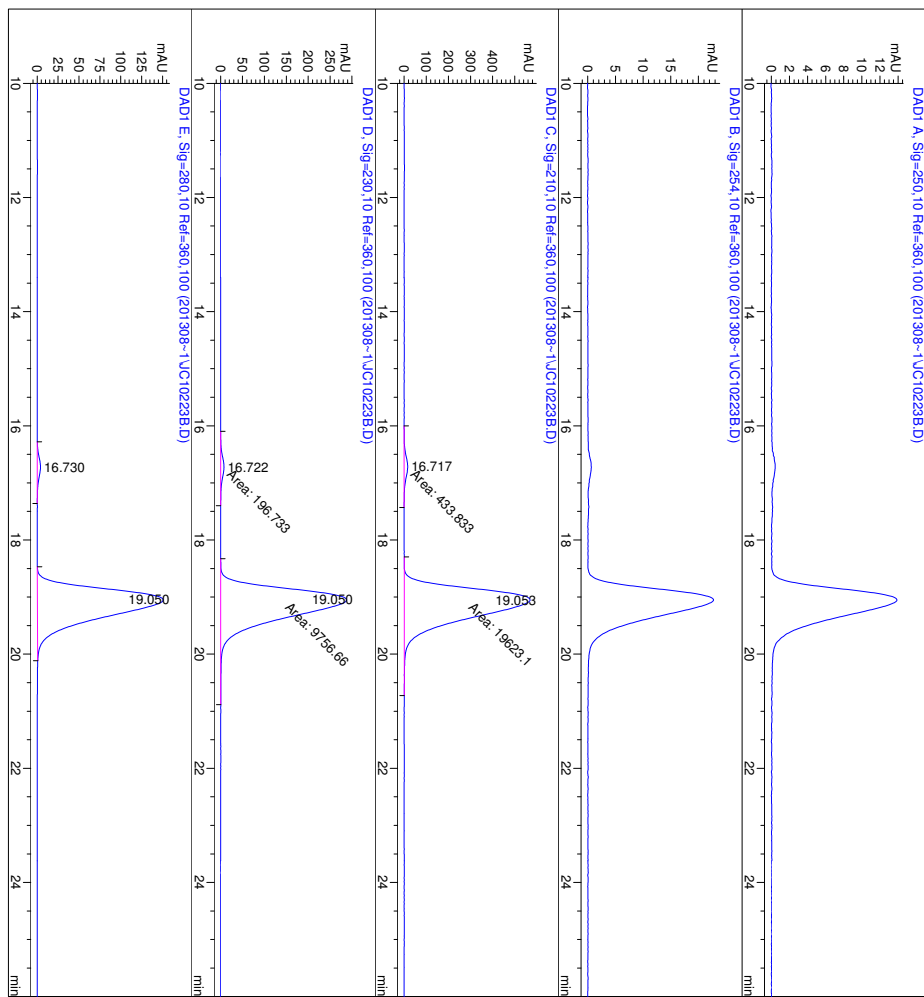

=====  
 Injection Date : 8/9/2013 1:39:02 AM      Seq. Line : 6  
 Sample Name : JC10207A                      Location : Vial 42  
 Acq. Operator : MK                            Inj : 1  
 Acq. Instrument : Instrument 1              Inj Volume : 5 µl  
 Different Inj Volume from Sequence !  
 Actual Inj Volume : 5 µl  
 Acq. Method : C:\HPCHEM\1\METHODS\OD-02-30.M  
 Last changed : 2/16/2013 4:45:43 PM by CE  
 Analysis Method : C:\HPCHEM\1\METHODS\AD005-40.M  
 Last changed : 8/2/2014 11:04:53 PM by MK  
 (modified after loading)

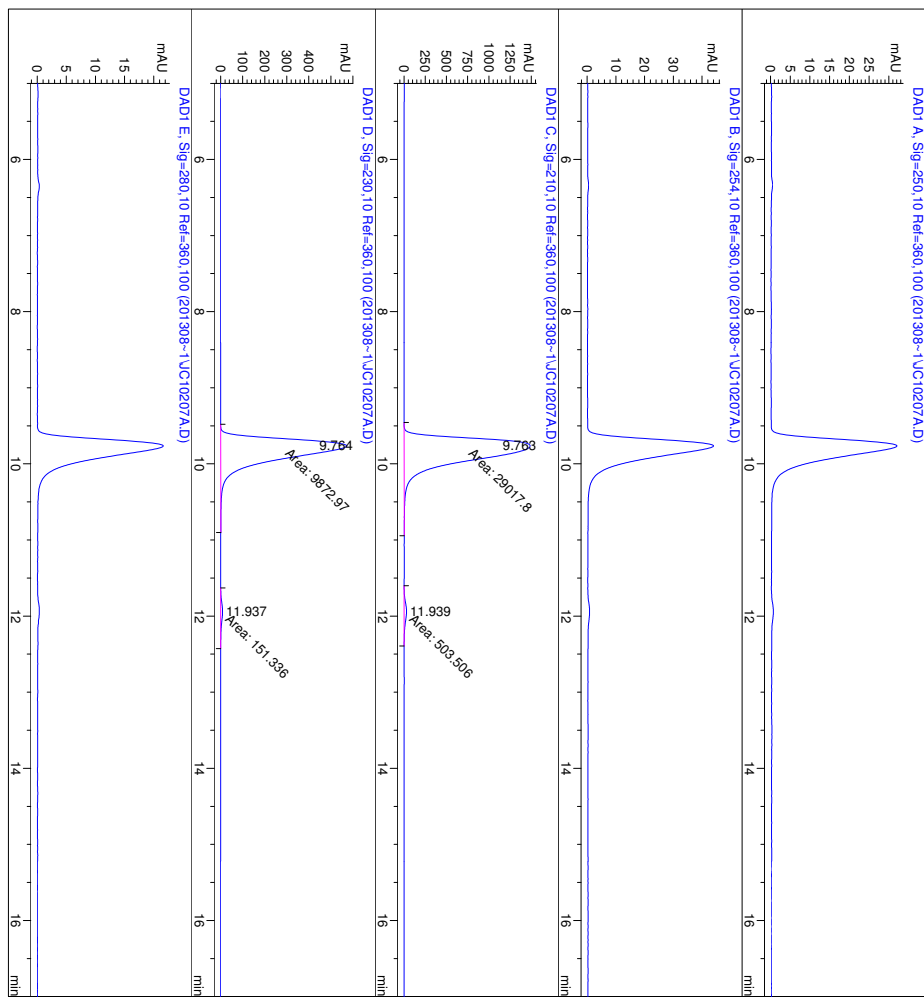

=====  
 Area Percent Report  
 =====  
 Sorted By : Signal  
 Multiplier : 1.0000  
 Dilution : 1.0000  
 Use Multiplier & Dilution Factor with ISTDs

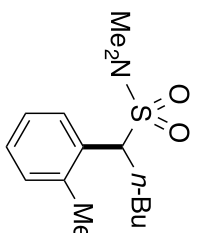

Table 4, entry 6  
 with (R,R)-L1

| Signal                                     | Peak # | RetTime [min] | Type | Width [min] | Area [mAU*s] | Height [mAU] | Area %  |
|--------------------------------------------|--------|---------------|------|-------------|--------------|--------------|---------|
| Signal 1: DADI A, Sig=250,10 Ref=360,100   | 1      | 9.763         | MM   | 0.3255      | 2.90178e4    | 1485.83618   | 98.2944 |
|                                            | 2      | 11.939        | MM   | 0.2984      | 503.50601    | 28.12491     | 1.7056  |
| Totals :                                   |        |               |      |             | 2.95213e4    | 1513.96109   |         |
| Results obtained with enhanced integrator! |        |               |      |             |              |              |         |
| Signal 4: DADI D, Sig=230,10 Ref=360,100   |        |               |      |             |              |              |         |
| Signal 5: DADI E, Sig=280,10 Ref=360,100   | 1      | 9.764         | MM   | 0.2880      | 9872.96777   | 571.38434    | 98.4903 |
|                                            | 2      | 11.937        | MM   | 0.2972      | 151.33591    | 8.48584      | 1.5097  |
| Totals :                                   |        |               |      |             | 1.00243e4    | 579.87018    |         |
| Results obtained with enhanced integrator! |        |               |      |             |              |              |         |
| Signal 5: DADI E, Sig=280,10 Ref=360,100   |        |               |      |             |              |              |         |

\*\*\* End of Report \*\*\*

=====  
 Injection Date : 8/9/2013 2:10:20 AM      Seq. Line : 7  
 Sample Name : JCI10207B                      Location : Vial 43  
 Acq. Operator : MK                              Inj : 1  
 Acq. Instrument : Instrument 1                Inj Volume : 15 µl  
 Different Inj Volume from Sequence !        Actual Inj Volume : 5 µl  
 Acq. Method : C:\HPCHEM\1\METHODS\OD-02-30.M  
 Last changed : 2/16/2013 4:45:43 PM by CE  
 Analysis Method : C:\HPCHEM\1\METHODS\AD005-40.M  
 Last changed : 8/1/2014 11:59:09 PM by MK  
 (modified after loading)

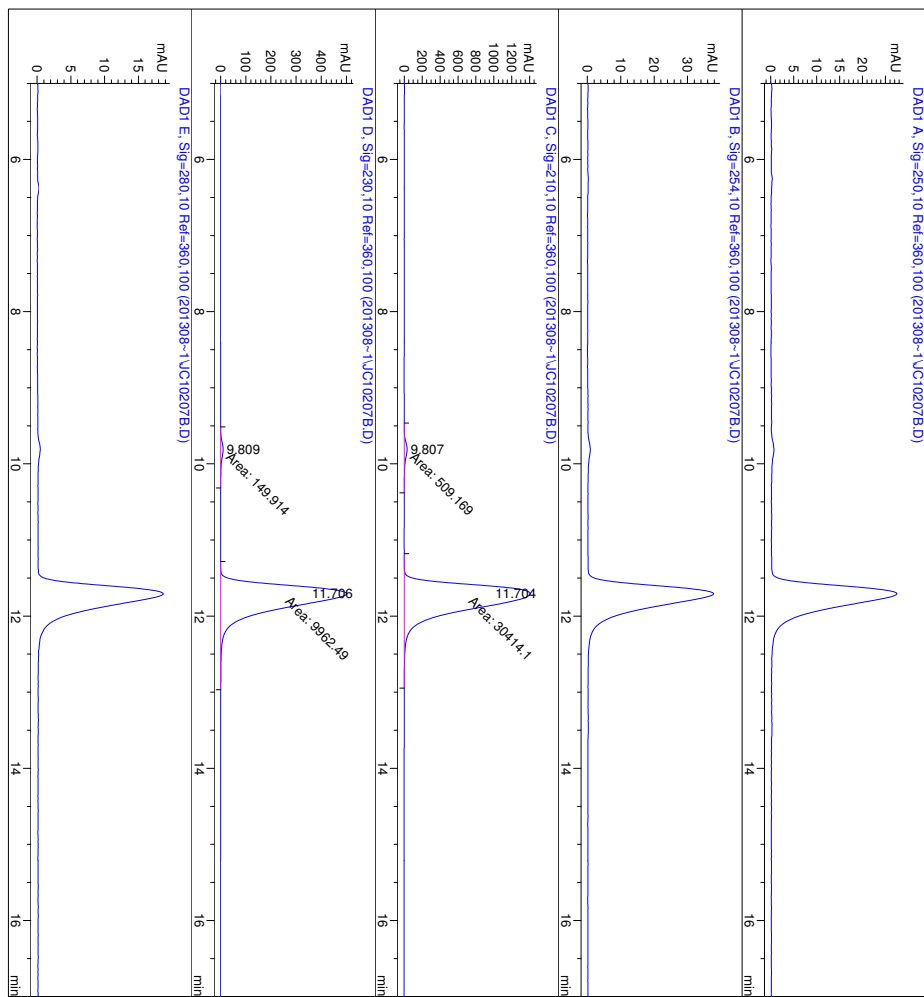

=====  
 Area Percent Report  
 =====  
 Sorted By : Signal  
 Multiplier : 1.0000  
 Dilution : 1.0000  
 Use Multiplier & Dilution Factor with ISTDs

Signal 1: DADI A, Sig=250,10 Ref=360,100  
 Signal 2: DADI B, Sig=254,10 Ref=360,100  
 Signal 3: DADI C, Sig=210,10 Ref=360,100

| Peak # | RetTime [min] | Type | Width [min] | Area [mAU*s] | Height [mAU] | Area %  |
|--------|---------------|------|-------------|--------------|--------------|---------|
| 1      | 9.807         | MM   | 0.2614      | 509.16885    | 32.46480     | 1.6466  |
| 2      | 11.704        | MM   | 0.3607      | 3.04141e4    | 1405.28198   | 98.3534 |

Totals : 3.09233e4 1437.74678  
 Results obtained with enhanced integrator!  
 Signal 4: DADI D, Sig=230,10 Ref=360,100  
 Signal 5: DADI E, Sig=280,10 Ref=360,100

| Peak # | RetTime [min] | Type | Width [min] | Area [mAU*s] | Height [mAU] | Area %  |
|--------|---------------|------|-------------|--------------|--------------|---------|
| 1      | 9.809         | MM   | 0.2538      | 149.91431    | 9.84457      | 1.4825  |
| 2      | 11.706        | MM   | 0.3315      | 9962.49023   | 500.87515    | 98.5175 |

Totals : 1.01124e4 510.71973  
 Results obtained with enhanced integrator!

\*\*\* End of Report \*\*\*

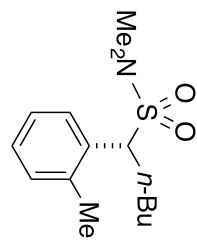

Table 4: entry 6  
 with (S,S)-L1

```

Injection Date : 10/16/2013 10:17:19 PM      Seq. Line : 3
Sample Name    : JC11021                    Location  : Vial 12
Acq. Operator  : TMB                        Inj       : 1
Acq. Instrument : Instrument 1              Inj Volume: 5 µl
Acq. Method    : C:\HPCHEM\1\METHODS\IC-1540.M
Last changed   : 5/17/2012 7:45:15 PM by JTM
Analysis Method : C:\HPCHEM\1\METHODS\ODH-0440.M
Last changed    : 7/30/2014 7:44:57 PM by TMB
                (modified after loading)
    
```

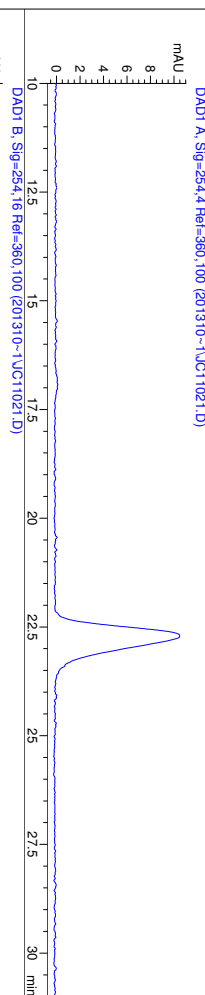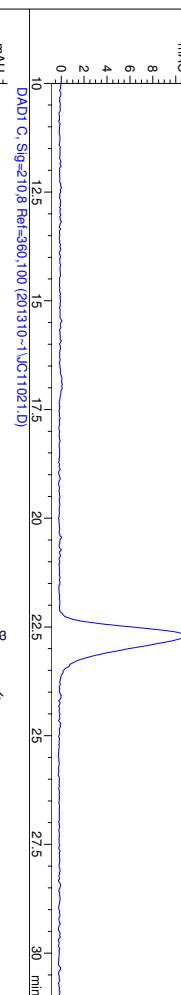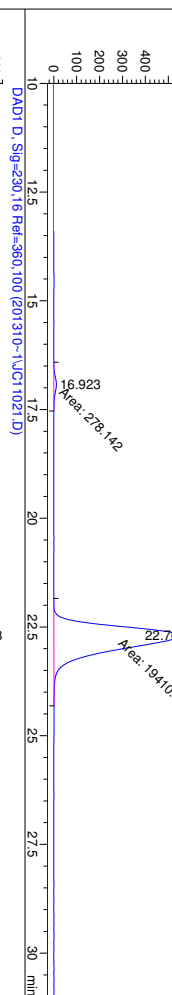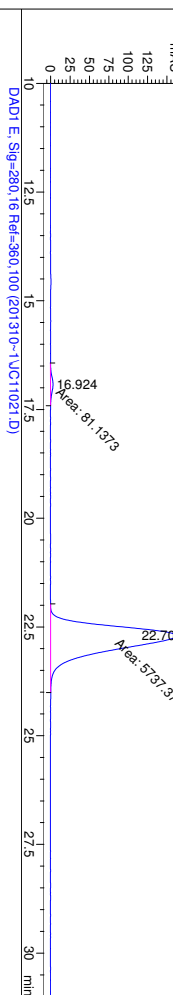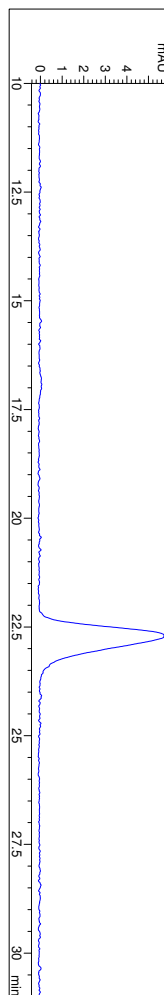

Area Percent Report

| Sorted By                                   | Signal |
|---------------------------------------------|--------|
| Multiplier                                  | 1.0000 |
| Dilution                                    | 1.0000 |
| Use Multiplier & Dilution Factor with ISTDs |        |

Signal 1: DADI A, Sig=254,4 Ref=360,100

Signal 2: DADI B, Sig=254,16 Ref=360,100

Signal 3: DADI C, Sig=210,8 Ref=360,100

| Peak # | RetTime [min] | Type | Width [min] | Area [mAU*s] | Height [mAU] | Area %  |
|--------|---------------|------|-------------|--------------|--------------|---------|
| 1      | 16.923        | MM   | 0.4228      | 278.14233    | 10.96450     | 1.4127  |
| 2      | 22.703        | MM   | 0.5880      | 1.94105e4    | 550.20209    | 98.5873 |

Totals : 1.96886e4 561.16659

Results obtained with enhanced integrator!

Signal 4: DADI D, Sig=230,16 Ref=360,100

| Peak # | RetTime [min] | Type | Width [min] | Area [mAU*s] | Height [mAU] | Area %  |
|--------|---------------|------|-------------|--------------|--------------|---------|
| 1      | 16.924        | MM   | 0.4149      | 81.13730     | 3.25970      | 1.3945  |
| 2      | 22.703        | MM   | 0.5891      | 5737.36523   | 162.31212    | 98.6055 |

Totals : 5818.50253 165.57181

Results obtained with enhanced integrator!

Signal 5: DADI E, Sig=280,16 Ref=360,100

\*\*\* End of Report \*\*\*

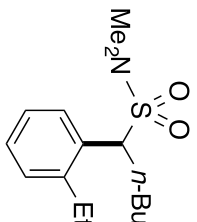

Table 4, entry 7  
with (R,R)-L1

Injection Date : 10/16/2013 9:36:03 PM  
 Sample Name : JCI0297B  
 Acq. Operator : TMB  
 Acq. Instrument : Instrument 1  
 Acq. Method : C:\HPCHEM\1\METHODS\IC-1540.M  
 Last changed : 5/17/2012 7:45:15 PM by JTM  
 Analysis Method : C:\HPCHEM\1\METHODS\ODH-0440.M  
 Last changed : 8/2/2014 12:24:05 AM by TMB

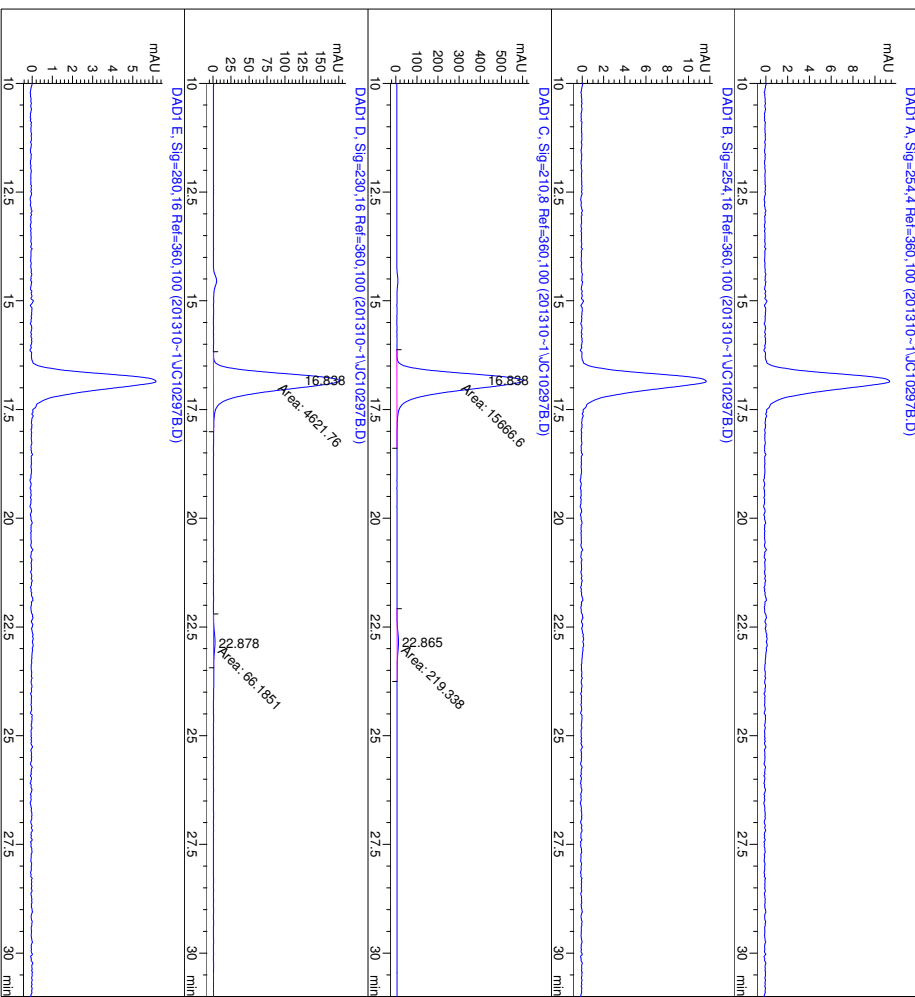

=====  
 Area Percent Report  
 =====

Sorted By :  
 Multiplier : 1.0000  
 Dilution : 1.0000  
 Use Multiplier & Dilution Factor with ISTDs

Signal 1: DAD1 A, Sig=254,4 Ref=360,100

Signal 2: DAD1 B, Sig=254,16 Ref=360,100

Signal 3: DAD1 C, Sig=210,8 Ref=360,100

| Peak # | RetTime [min] | Type | Width [min] | Area [mAU*s] | Height [mAU] | Area %  |
|--------|---------------|------|-------------|--------------|--------------|---------|
| 1      | 16.838        | MM   | 0.4381      | 1.56666e4    | 596.02325    | 98.6193 |
| 2      | 22.865        | MM   | 0.5524      | 219.33803    | 6.61832      | 1.3807  |

Totals : 1.58860e4 602.64157

Results obtained with enhanced integrator!

Signal 4: DAD1 D, Sig=230,16 Ref=360,100

| Peak # | RetTime [min] | Type | Width [min] | Area [mAU*s] | Height [mAU] | Area %  |
|--------|---------------|------|-------------|--------------|--------------|---------|
| 1      | 16.838        | MM   | 0.4396      | 4621.76465   | 175.22726    | 98.5682 |
| 2      | 22.878        | MM   | 0.5719      | 66.18513     | 1.92889      | 1.4118  |

Totals : 4687.94978 177.15616

Results obtained with enhanced integrator!

Signal 5: DAD1 E, Sig=280,16 Ref=360,100

=====  
 \*\*\* End of Report \*\*\*  
 =====

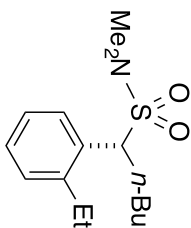

Table 4, entry 7  
 with (S,S)-L1

Injection Date : 6/15/2013 12:06:30 AM  
 Sample Name : JC10143B  
 Acq. Operator : CE  
 Acq. Instrument : Instrument 1  
 Different Inj Volume from Sequence : Actual Inj Volume : 15 µl  
 Last changed : 2/22/2013 10:06:44 AM by CE  
 Analysis Method : C:\HPCHEM\1\METHODS\OD-02-20.M  
 Last changed : 7/30/2014 7:30:18 PM by MK  
 (modified after loading)

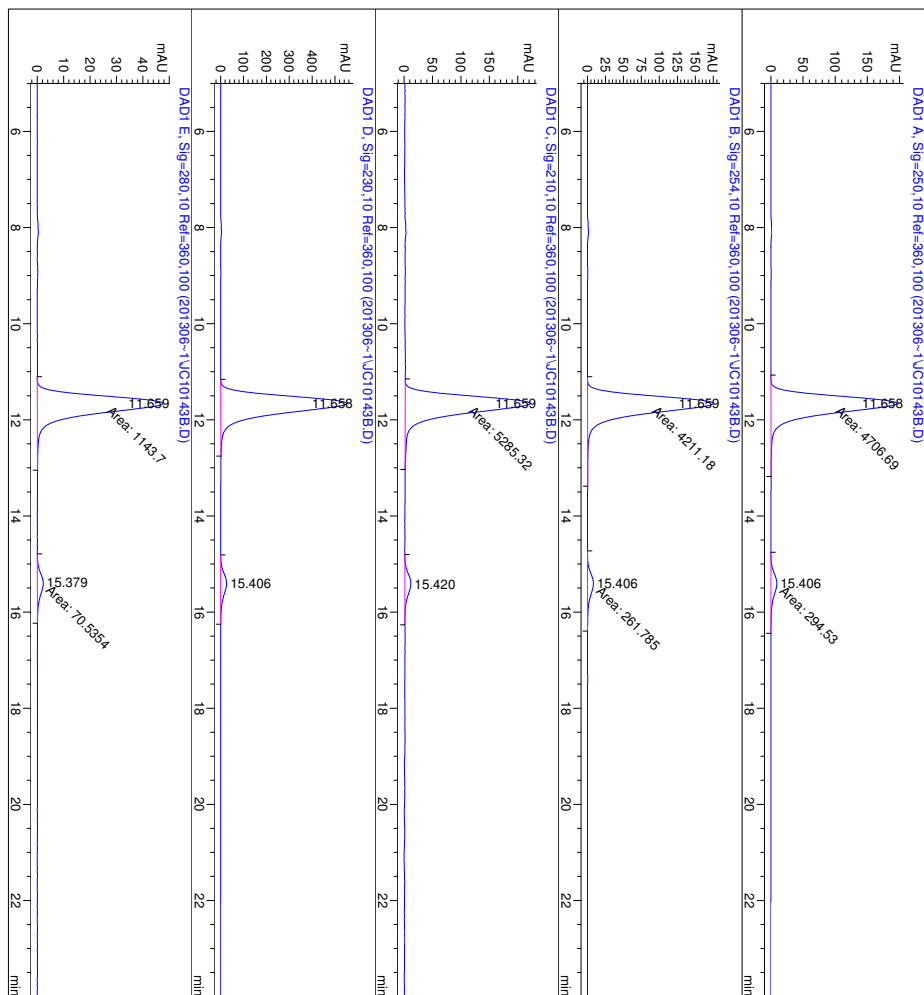

Sorted By : Signal  
 Multiplier : 1.0000  
 Dilution : 1.0000  
 Use Multiplier & Dilution Factor with ISTDs

| Peak #                        | RetTime [min] | Type | Width [min] | Area [mAU*s] | Height [mAU] | Area %  |
|-------------------------------|---------------|------|-------------|--------------|--------------|---------|
| 1                             | 11.658        | MM   | 0.4004      | 4706.68896   | 195.89636    | 94.1108 |
| 2                             | 15.406        | MM   | 0.5371      | 294.53040    | 9.13878      | 5.8892  |
| Totals : 5001.21936 205.03514 |               |      |             |              |              |         |

Table 4, entry 8 with (R,R)-L1

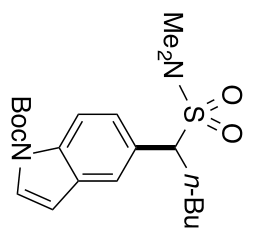

| Signal                                   | RetTime [min] | Type | Width [min] | Area [mAU*s] | Height [mAU] | Area %  |
|------------------------------------------|---------------|------|-------------|--------------|--------------|---------|
| Signal 1: DADI A, Sig=250,10 Ref=360,100 | 11.658        | MM   | 0.4004      | 4706.68896   | 195.89636    | 94.1108 |
|                                          | 15.406        | MM   | 0.5371      | 294.53040    | 9.13878      | 5.8892  |
| Totals : 5001.21936 205.03514            |               |      |             |              |              |         |
| Signal 2: DADI B, Sig=254,10 Ref=360,100 | 11.659        | MM   | 0.4006      | 4211.17676   | 175.21336    | 94.1474 |
|                                          | 15.406        | MM   | 0.5364      | 261.78525    | 8.13331      | 5.8526  |
| Totals : 4472.96201 183.34668            |               |      |             |              |              |         |
| Signal 3: DADI C, Sig=210,10 Ref=360,100 | 11.659        | MM   | 0.4013      | 5285.31982   | 219.49617    | 94.0588 |
|                                          | 15.420        | PV   | 0.3792      | 333.84775    | 10.60698     | 5.9412  |
| Totals : 5619.16757 230.10315            |               |      |             |              |              |         |
| Signal 4: DADI D, Sig=230,10 Ref=360,100 | 11.658        | BB   | 0.3701      | 1.32119e4    | 550.22070    | 94.1265 |
|                                          | 15.406        | BB   | 0.4979      | 824.42981    | 25.86081     | 5.8735  |
| Totals : 1.40364e4 576.08152             |               |      |             |              |              |         |
| Signal 5: DADI E, Sig=280,10 Ref=360,100 | 11.659        | MM   | 0.4000      | 1143.70020   | 47.65256     | 94.1910 |
|                                          | 15.379        | MM   | 0.5311      | 70.53535     | 2.21351      | 5.8090  |
| Totals : 1214.23555 49.86587             |               |      |             |              |              |         |

Results obtained with enhanced integrator!  
 Results obtained with enhanced integrator!  
 Results obtained with enhanced integrator!  
 \*\*\* End of Report \*\*\*



=====  
Injection Date : 6/14/2013 11:25:16 PM      Seq. Line : 3  
Sample Name : JCI10133B                      Location : Vial 31  
Acq. Operator : CE                              Inj : 1  
Acq. Instrument : Instrument 1                Inj Volume : 15 µl  
Dilution : 1.0000  
Different Inj Volume from Sequence !        Actual Inj Volume : 2 µl  
Acq. Method : C:\HPCHEM\1\METHODS\VD-02-40.M  
Last changed : 2/22/2013 10:06:44 AM by CE  
Analysis Method : C:\HPCHEM\1\METHODS\AD005-40.M  
Last changed : 8/2/2014 12:07:02 AM by MK  
(modified after loading)  
=====

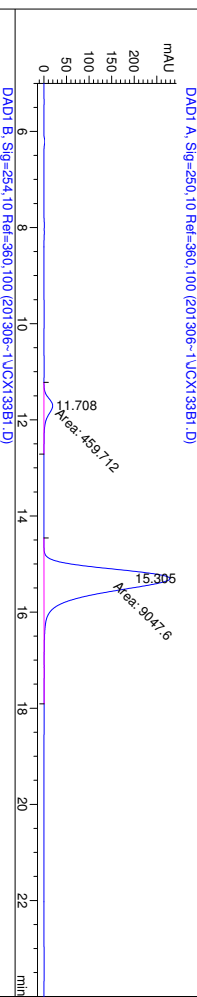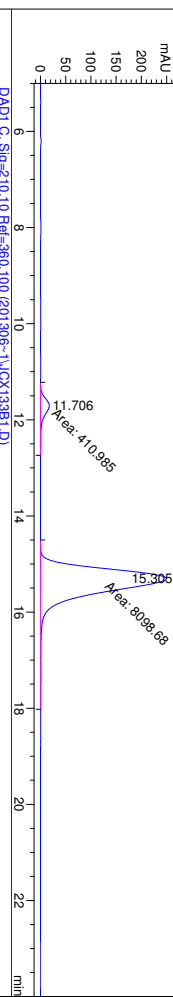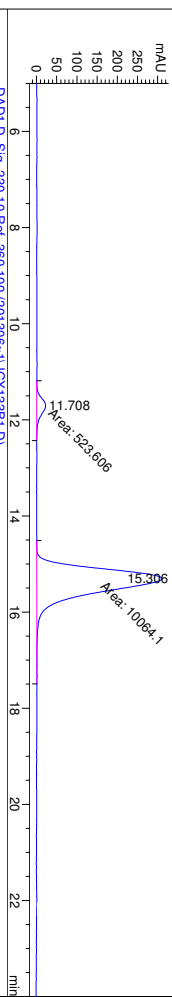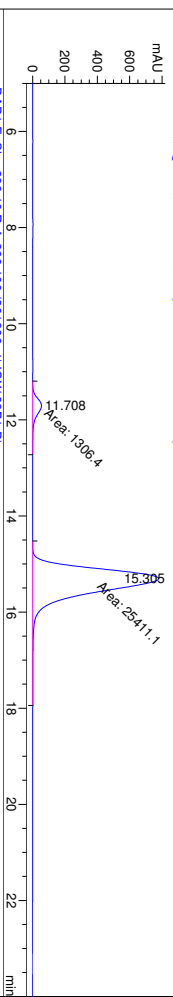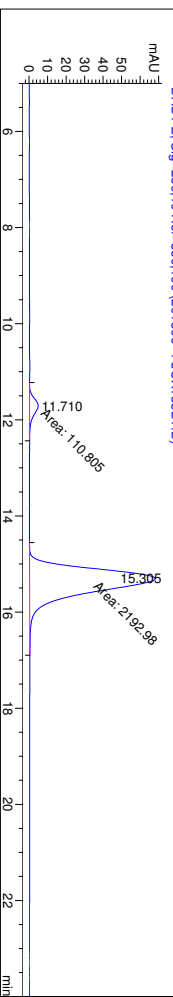

=====  
Area Percent Report  
=====

Sorted By : Signal  
Multiplier : 1.0000  
Dilution : 1.0000  
Use Multiplier & Dilution Factor with ISTDs

Signal 1: DADI A, Sig=250,10 Ref=360,100

| Peak # | RetTime [min] | Width [min] | Area [mAU*s] | Height [mAU] | Area %  |
|--------|---------------|-------------|--------------|--------------|---------|
| 1      | 11.708        | 0.4004      | 459.71191    | 19.13779     | 4.8354  |
| 2      | 15.305        | 0.5404      | 9047.59863   | 279.01901    | 95.1646 |

Totals : 9507.31055 298.15680

Signal 2: DADI B, Sig=254,10 Ref=360,100

| Peak # | RetTime [min] | Width [min] | Area [mAU*s] | Height [mAU] | Area %  |
|--------|---------------|-------------|--------------|--------------|---------|
| 1      | 11.706        | 0.4003      | 410.98477    | 17.11033     | 4.8296  |
| 2      | 15.305        | 0.5407      | 8098.67578   | 249.64102    | 95.1704 |

Totals : 8509.66055 266.75135

Signal 3: DADI C, Sig=210,10 Ref=360,100

| Peak # | RetTime [min] | Width [min] | Area [mAU*s] | Height [mAU] | Area %  |
|--------|---------------|-------------|--------------|--------------|---------|
| 1      | 11.708        | 0.4001      | 523.60632    | 21.81178     | 4.9454  |
| 2      | 15.306        | 0.5401      | 1.00641e4    | 310.58426    | 95.0546 |

Totals : 1.05877e4 332.39604

Signal 4: DADI D, Sig=230,10 Ref=360,100

| Peak # | RetTime [min] | Width [min] | Area [mAU*s] | Height [mAU] | Area %  |
|--------|---------------|-------------|--------------|--------------|---------|
| 1      | 11.708        | 0.4006      | 1306.40112   | 54.35100     | 4.8897  |
| 2      | 15.305        | 0.5438      | 2.54111e4    | 778.85779    | 95.1103 |

Totals : 2.67175e4 833.20879

Signal 5: DADI E, Sig=280,10 Ref=360,100

| Peak # | RetTime [min] | Width [min] | Area [mAU*s] | Height [mAU] | Area %  |
|--------|---------------|-------------|--------------|--------------|---------|
| 1      | 11.710        | 0.3975      | 110.80473    | 4.64648      | 4.8097  |
| 2      | 15.305        | 0.5379      | 2192.98193   | 67.95478     | 95.1903 |

Totals : 2303.78667 72.60126

Results obtained with enhanced integrator!  
=====

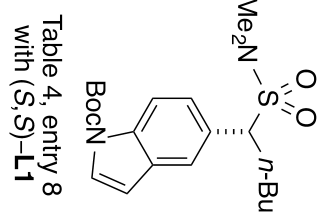

Injection Date : 8/1/2013 10:52:58 AM  
 Sample Name : JCI0219A  
 Acq. Operator : CE  
 Acq. Instrument : Instrument 1  
 Different Inj Volume from Sequence : Inj Volume : 15 µl  
 Actual Inj Volume : 5 µl  
 Accr. Method : C:\HPCHEM\1\METHODS\OD-05-40.M  
 Last changed : 4/7/2011 5:39:35 PM by CC  
 Analysis Method : C:\HPCHEM\1\METHODS\OD-02-20.M  
 Last changed : 7/30/2014 7:32:55 PM by MK  
 (modified after loading)

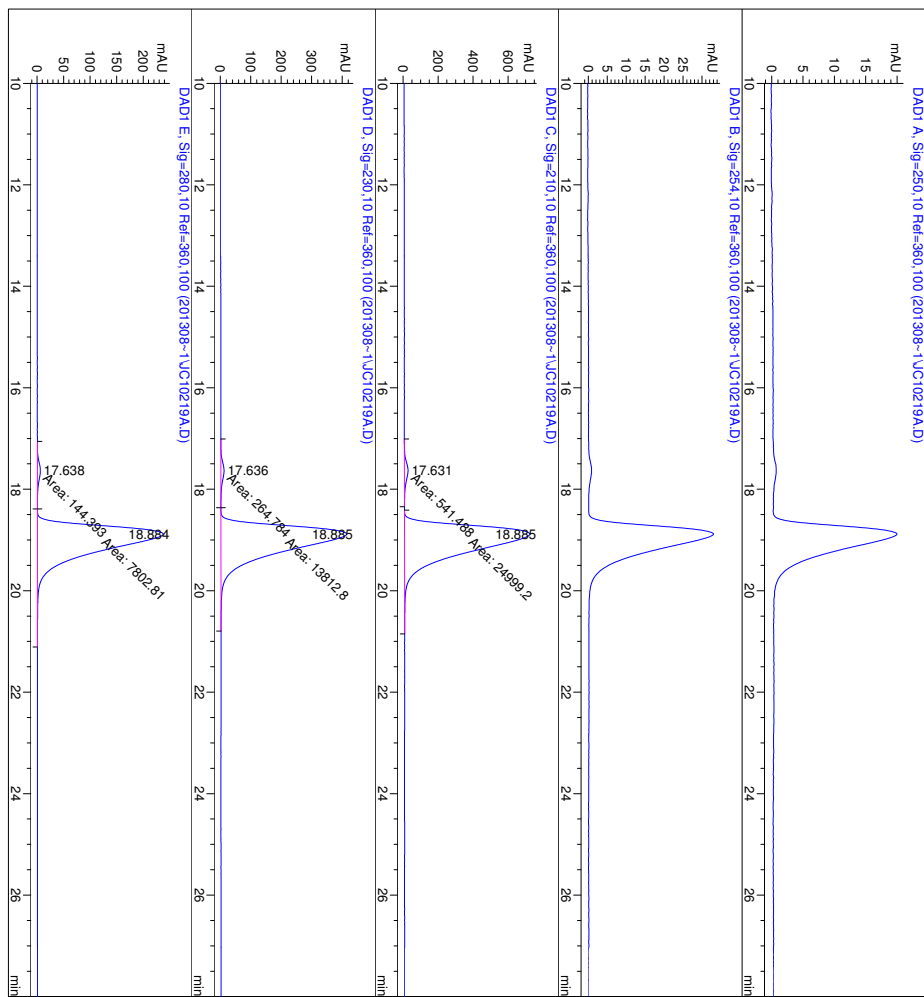

Area Percent Report  
 Sorted By : Signal  
 Multiplier : 1.0000  
 Dilution : 1.0000  
 Use Multiplier & Dilution Factor with ISTDs

Signal 1: DAD1 A, Sig=250,10 Ref=360,100

Signal 2: DAD1 B, Sig=254,10 Ref=360,100

Signal 3: DAD1 C, Sig=210,10 Ref=360,100

| Peak # | RetTime [min] | Type | Width [min] | Area [mAU*s] | Height [mAU] | Area %  |
|--------|---------------|------|-------------|--------------|--------------|---------|
| 1      | 17.631        | MM   | 0.4328      | 541.48834    | 20.85328     | 2.1201  |
| 2      | 18.885        | MM   | 0.5805      | 2.49992e4    | 717.76105    | 97.8799 |

Totals : 2.55407e4 738.61432

Results obtained with enhanced integrator!

Signal 4: DAD1 D, Sig=230,10 Ref=360,100

| Peak # | RetTime [min] | Type | Width [min] | Area [mAU*s] | Height [mAU] | Area %  |
|--------|---------------|------|-------------|--------------|--------------|---------|
| 1      | 17.636        | MM   | 0.4283      | 264.78415    | 10.30480     | 1.8809  |
| 2      | 18.885        | MM   | 0.5576      | 1.38128e4    | 412.84863    | 98.1191 |

Totals : 1.40776e4 423.15343

Results obtained with enhanced integrator!

Signal 5: DAD1 E, Sig=280,10 Ref=360,100

| Peak # | RetTime [min] | Type | Width [min] | Area [mAU*s] | Height [mAU] | Area %  |
|--------|---------------|------|-------------|--------------|--------------|---------|
| 1      | 17.638        | MM   | 0.4283      | 144.39316    | 5.61829      | 1.8169  |
| 2      | 18.884        | MM   | 0.5489      | 7802.81396   | 236.90977    | 98.1831 |

Totals : 7947.20712 242.52807

Results obtained with enhanced integrator!

\*\*\* End of Report \*\*\*

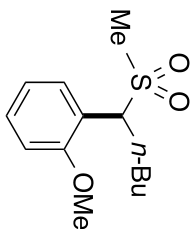

Table 4, entry 9 with (R,R)-Li

Injection Date : 8/1/2013 11:34:20 AM  
 Sample Name : JC10219B  
 Acq. Operator : CE  
 Acq. Instrument : Instrument 1  
 Different Inj Volume from Sequence : Actual Inj Volume : 15 µl  
 Inj Volume : 5 µl  
 Accr. Method : C:\HPCHEM\1\METHODS\OD-05-40.M  
 Last changed : 4/7/2011 5:39:35 PM by CC  
 Analysis Method : C:\HPCHEM\1\METHODS\AD005-40.M  
 Last changed : 8/2/2014 12:10:26 AM by MK  
 (modified after loading)

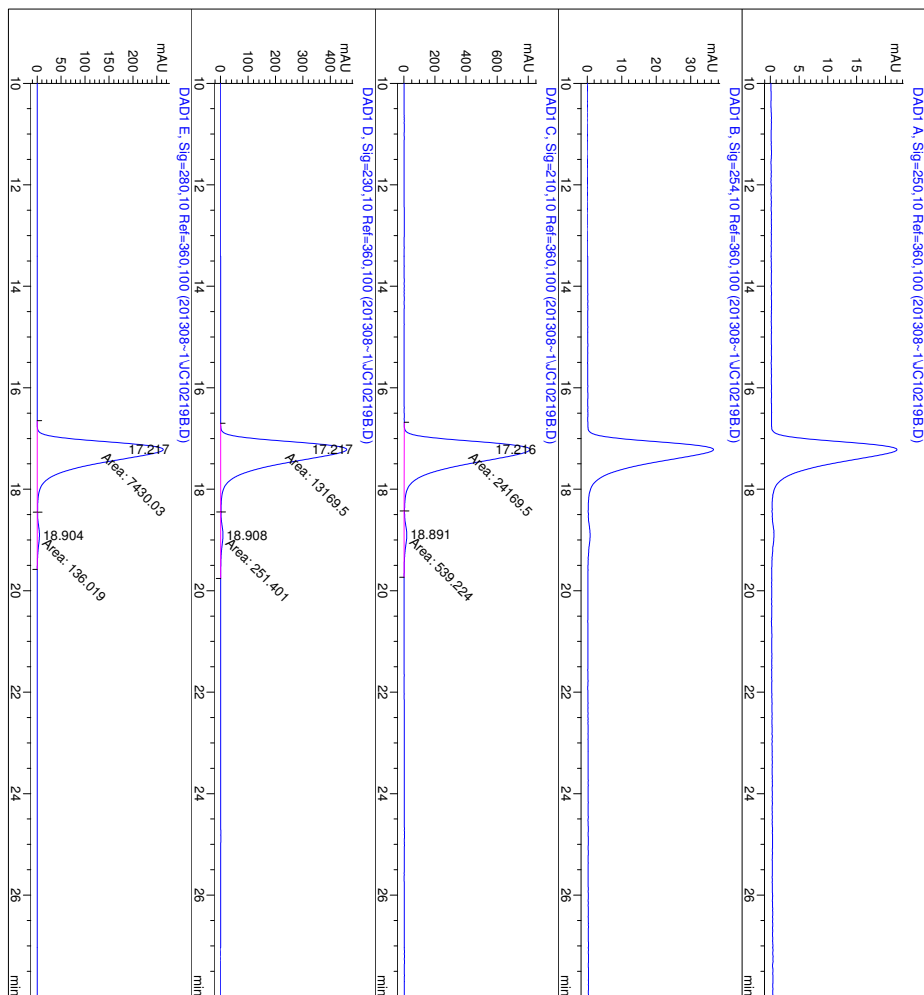

Area Percent Report  
 Sorted By : Signal  
 Multiplier : 1.0000  
 Dilution : 1.0000  
 Use Multiplier & Dilution Factor with ISTDs

| Signal                                   | Peak # | RetTime [min] | Type | Width [min] | Area [mAU*s] | Height [mAU] | Area %  |
|------------------------------------------|--------|---------------|------|-------------|--------------|--------------|---------|
| Signal 1: DADI A, Sig=250,10 Ref=360,100 | 1      | 17.216        | MF   | 0.4968      | 2.41695e4    | 810.78070    | 97.8177 |
| Signal 2: DADI B, Sig=254,10 Ref=360,100 | 2      | 18.891        | FM   | 0.5248      | 539.22418    | 17.12366     | 2.1823  |
| Signal 3: DADI C, Sig=210,10 Ref=360,100 | 1      | 17.217        | MF   | 0.4700      | 7430.02881   | 263.47412    | 98.2022 |
| Signal 4: DADI D, Sig=230,10 Ref=360,100 | 2      | 18.904        | FM   | 0.5030      | 136.01933    | 4.50659      | 1.7978  |

Totals : 2.47087e4 827.90436  
 Results obtained with enhanced integrator!  
 Signal 4: DADI D, Sig=230,10 Ref=360,100  
 Peak RetTime Type Width Area Height Area %  
 # [min] [min] [mAU\*s] [mAU] %  
 1 17.217 MF 0.4777 1.31695e4 459.48663 98.1268  
 2 18.908 FM 0.5063 251.40105 8.27497 1.8732  
 Totals : 1.34209e4 467.76160  
 Results obtained with enhanced integrator!  
 Signal 5: DADI E, Sig=280,10 Ref=360,100  
 Peak RetTime Type Width Area Height Area %  
 # [min] [min] [mAU\*s] [mAU] %  
 1 17.217 MF 0.4700 7430.02881 263.47412 98.2022  
 2 18.904 FM 0.5030 136.01933 4.50659 1.7978  
 Totals : 7566.04814 267.98071  
 Results obtained with enhanced integrator!  
 \*\*\* End of Report \*\*\*

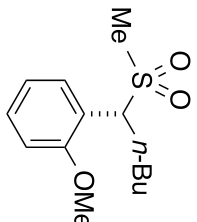

Table 4, entry 9  
 with (S,S)-L1

=====  
 Injection Date : 8/1/2013 2:28:49 AM      Seq. Line : 18  
 Sample Name : JC10215A                      Location : Vial 79  
 Acq. Operator : CE                            Inj : 1  
 Acq. Instrument : Instrument 1                Inj Volume : 15 µl  
 Different Inj Volume from Sequence 1        Actual Inj Volume : 5 µl  
 Acq. Method : C:\HPCHEM\1\METHODS\AS-10-40.M  
 Last changed : 4/6/2011 9:32:30 PM by CC  
 Analysis Method : C:\HPCHEM\1\METHODS\OD-02-20.M  
 Last changed : 7/30/2014 7:34:25 PM by MK  
 (modified after loading)

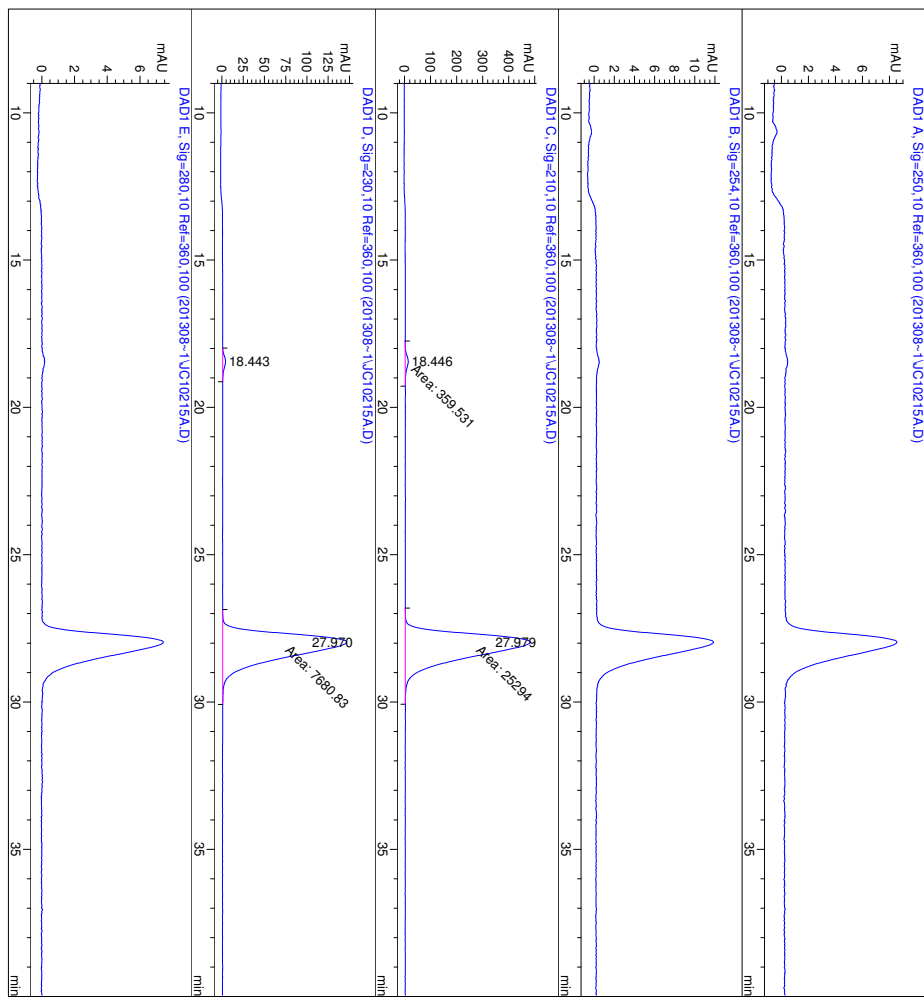

=====  
 Area Percent Report  
 =====  
 Sorted By : Signal  
 Multiplier : 1.0000  
 Dilution : 1.0000  
 Use Multiplier & Dilution Factor with ISTDs

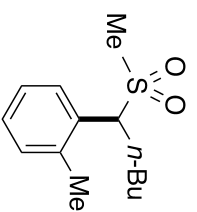

Table 4, entry 10  
 with (R<sub>1</sub>R)-L1

| Peak #   | RetTime [min] | Type | Width [min] | Area [mAU*s] | Height [mAU] | Area %  |
|----------|---------------|------|-------------|--------------|--------------|---------|
| 1        | 18.446        | MM   | 0.5153      | 359.53079    | 11.62884     | 1.4015  |
| 2        | 27.979        | MM   | 0.8786      | 2.52940e4    | 479.81430    | 98.5985 |
| Totals : |               |      |             | 2.56535e4    | 491.44314    |         |

Results obtained with enhanced integrator!  
 Signal 4: DAD1 D, Sig=230,10 Ref=360,100

| Peak #   | RetTime [min] | Type | Width [min] | Area [mAU*s] | Height [mAU] | Area %  |
|----------|---------------|------|-------------|--------------|--------------|---------|
| 1        | 18.443        | BB   | 0.3614      | 96.55293     | 3.35807      | 1.2415  |
| 2        | 27.970        | MM   | 0.8773      | 7680.83154   | 145.92509    | 98.7585 |
| Totals : |               |      |             | 7777.38447   | 149.28317    |         |

Results obtained with enhanced integrator!  
 Signal 5: DAD1 E, Sig=280,10 Ref=360,100

=====  
 \*\*\* End of Report \*\*\*  
 =====

Injection Date : 8/1/2013 3:10:07 AM  
 Sample Name : JC10215B  
 Acq. Operator : CE  
 Acq. Instrument : Instrument 1  
 Different Inj Volume from Sequence : Inj Volume : 15 µl  
 Last changed : 4/6/2011 9:32:30 PM by CC  
 Analysis Method : C:\HPCHEM\1\METHODS\AS-10-40.M  
 Last changed : 8/2/2014 12:12:31 AM by MK  
 (modified after loading)

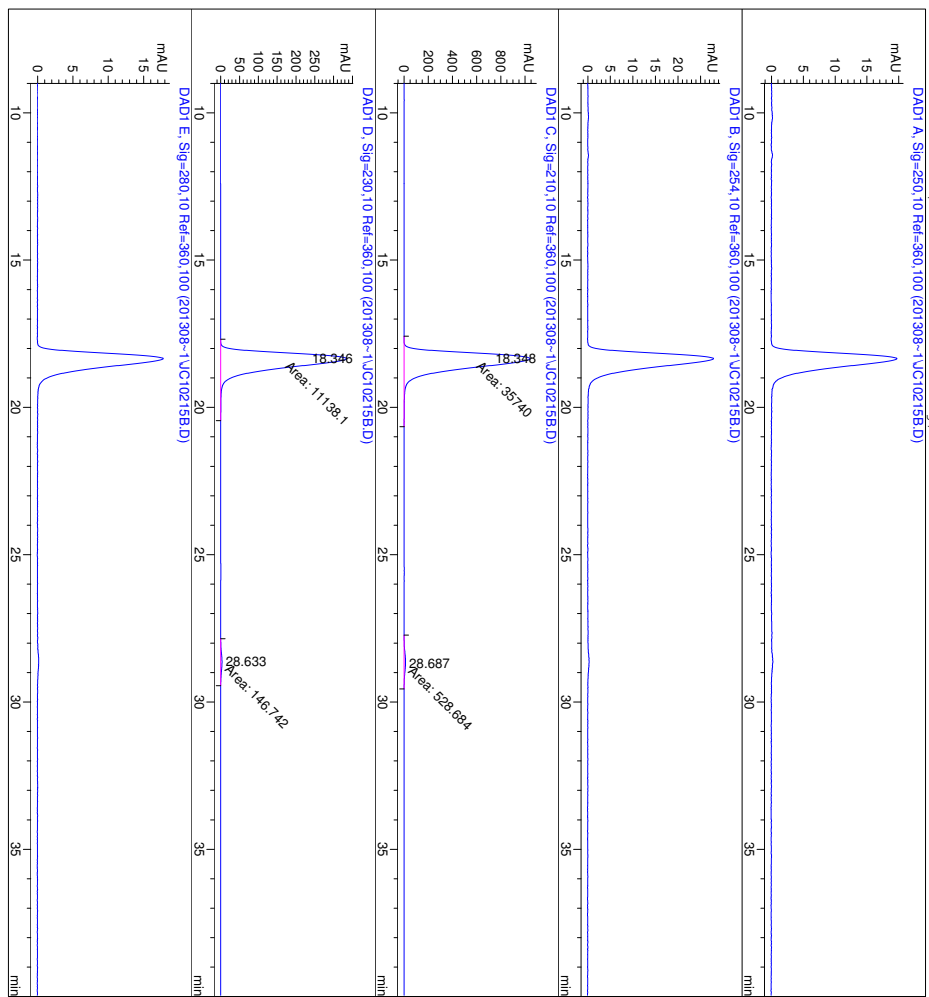

Area Percent Report  
 Sorted By : Signal  
 Multiplier : 1.0000  
 Dilution : 1.0000  
 Use Multiplier & Dilution Factor with ISTDs

Signal 1: DAD1 A, Sig=250,10 Ref=360,100

Signal 2: DAD1 B, Sig=254,10 Ref=360,100

Signal 3: DAD1 C, Sig=210,10 Ref=360,100

| Peak # | RetTime [min] | Type | Width [min] | Area [mAU*s] | Height [mAU] | Area %  |
|--------|---------------|------|-------------|--------------|--------------|---------|
| 1      | 18.348        | MM   | 0.5711      | 3.57400e4    | 1042.94275   | 98.5423 |
| 2      | 28.687        | MM   | 0.7471      | 528.68359    | 11.79463     | 1.4577  |

Totals : 3.62687e4 1054.73737

Results obtained with enhanced integrator!

Signal 4: DAD1 D, Sig=230,10 Ref=360,100

| Peak # | RetTime [min] | Type | Width [min] | Area [mAU*s] | Height [mAU] | Area %  |
|--------|---------------|------|-------------|--------------|--------------|---------|
| 1      | 18.346        | MM   | 0.5543      | 1.11381e4    | 334.92871    | 98.6997 |
| 2      | 28.633        | MM   | 0.6968      | 146.74203    | 3.50967      | 1.3003  |

Totals : 1.12849e4 338.43838

Results obtained with enhanced integrator!

Signal 5: DAD1 E, Sig=280,10 Ref=360,100

\*\*\* End of Report \*\*\*

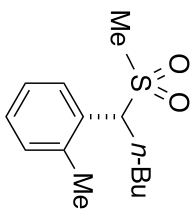

Table 4, entry 10  
with (S,S)-L1

=====  
 Injection Date : 10/16/2013 10:37:14 PM      Seq. Line : 2  
 Sample Name : JC11023A                              Location : Vial 91  
 Acq. Operator : MK                                    Inj : 1  
 Acq. Instrument : Instrument 1                      Inj Volume : 15 µl  
 Different Inj Volume from Sequence 1              Actual Inj Volume : 5 µl  
 Acq. Method : C:\HPCHEM\1\METHODS\AS-10-40.M  
 Last changed : 9/3/2013 3:07:57 PM by MK  
 Analysis Method : C:\HPCHEM\1\METHODS\AD003-40.M  
 Last changed : 8/2/2014 12:15:46 AM by MK  
 (modified after loading)

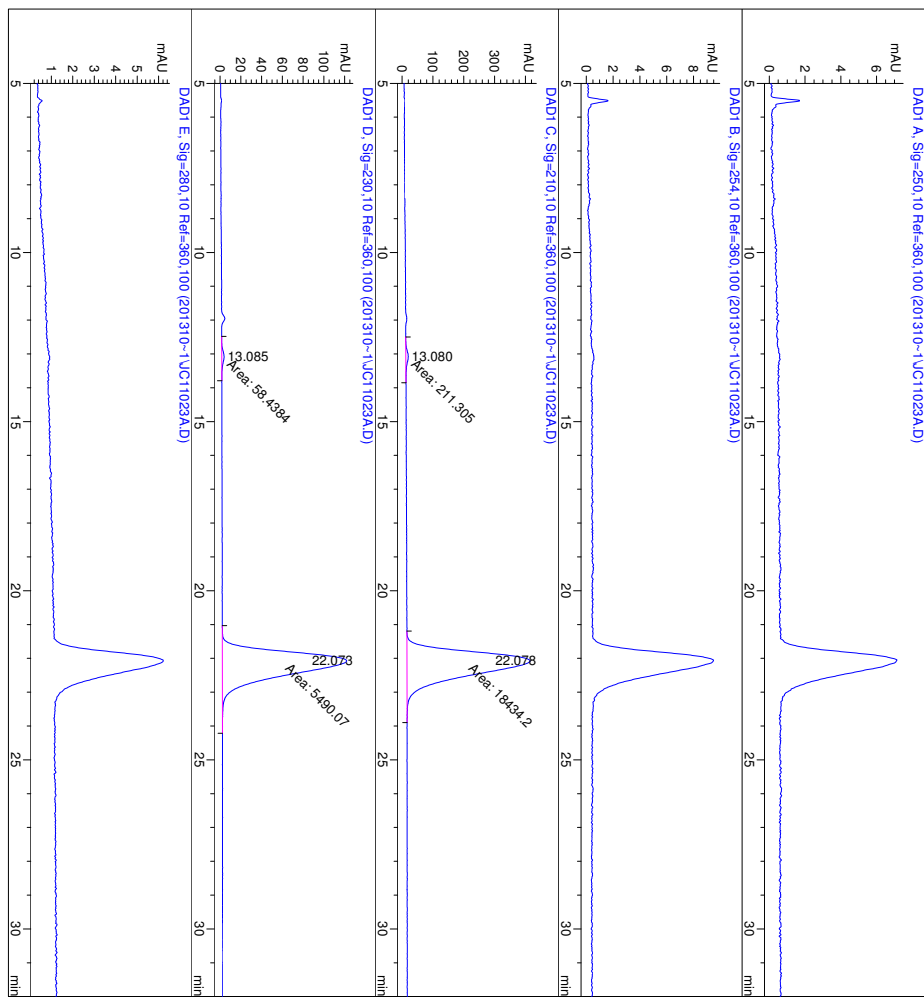

=====  
 Area Percent Report  
 =====  
 Sorted By : Signal  
 Multiplier : 1.0000  
 Dilution : 1.0000  
 Use Multiplier & Dilution Factor with ISTDs

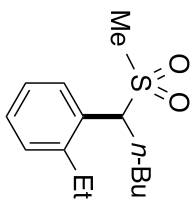

Table 4, entry 11  
 with (R,R)-L1

| Signal                                   | Peak # | RetTime [min] | Type | Width [min] | Area [mAU*s] | Height [mAU] | Area %  |
|------------------------------------------|--------|---------------|------|-------------|--------------|--------------|---------|
| Signal 3: DAD1 C, Sig=210,10 Ref=360,100 | 1      | 13.080        | MM   | 0.4495      | 211.30522    | 7.83469      | 1.1333  |
|                                          | 2      | 22.078        | MM   | 0.7688      | 1.84342e4    | 399.62811    | 98.8667 |

Totals : 1.86455e4 407.46281

Results obtained with enhanced integrator!

| Signal                                   | Peak # | RetTime [min] | Type | Width [min] | Area [mAU*s] | Height [mAU] | Area %  |
|------------------------------------------|--------|---------------|------|-------------|--------------|--------------|---------|
| Signal 4: DAD1 D, Sig=230,10 Ref=360,100 | 1      | 13.085        | MM   | 0.4251      | 58.43836     | 2.29142      | 1.0532  |
|                                          | 2      | 22.073        | MM   | 0.7638      | 5430.07422   | 119.79153    | 98.9468 |

Totals : 5548.51258 122.08295

Results obtained with enhanced integrator!

Signal 5: DAD1 E, Sig=280,10 Ref=360,100

=====  
 \*\*\* End of Report \*\*\*

Injection Date : 10/16/2013 11:18:31 PM  
 Sample Name : JC11023B  
 Acq. Operator : MK  
 Acq. Instrument : Instrument 1  
 Different Inj Volume from Sequence : Inj Volume : 15 µl  
 Last changed : 9/3/2013 3:07:57 PM by MK  
 Analysis Method : C:\HPCHEM\1\METHODS\AS-10-40.M  
 Last changed : 8/2/2014 12:15:46 AM by MK  
 (modified after loading)

=====  
 Area Percent Report  
 =====  
 Sorted By : Signal  
 Multiplier : 1.0000  
 Dilution : 1.0000  
 Use Multiplier & Dilution Factor with ISTDs

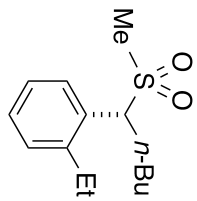

Table 4, entry 11  
 with (S,S)-L1

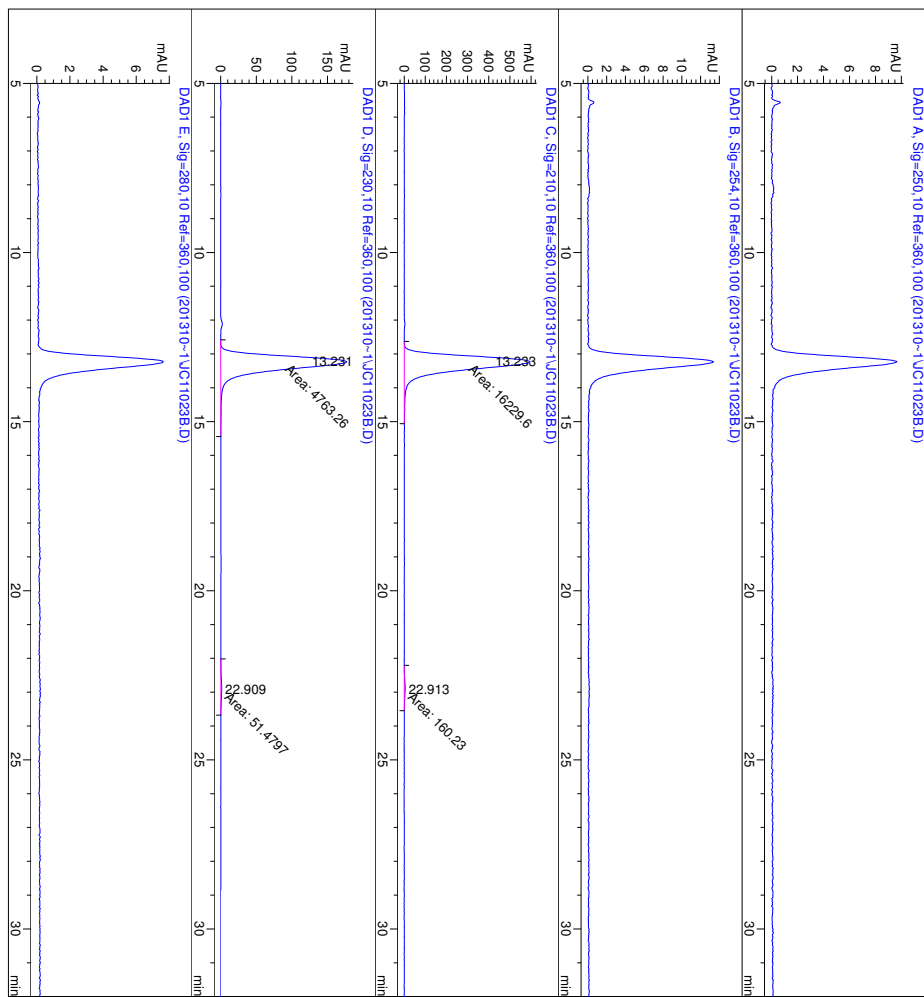

| Peak # | RetTime [min] | Type | Width [min] | Area [mAU*s] | Height [mAU] | Area %  |
|--------|---------------|------|-------------|--------------|--------------|---------|
| 1      | 13.233        | MM   | 0.4545      | 1.62296e4    | 595.18054    | 99.0224 |
| 2      | 22.913        | MM   | 0.6434      | 160.23030    | 4.15061      | 0.9776  |

Totals : 1.63899e4 599.33115  
 Results obtained with enhanced integrator!  
 Signal 4: DAD1 D, Sig=230,10 Ref=360,100  
 Peak RetTime Type Width Area Height Area  
 # [min] [min] [mAU\*s] [mAU] %  
 1 13.231 MM 0.4491 4763.26123 176.78093 98.9308  
 2 22.909 MM 0.6799 51.47974 1.26191 1.0692  
 Totals : 4814.74097 178.04284  
 Results obtained with enhanced integrator!  
 Signal 5: DAD1 E, Sig=280,10 Ref=360,100

=====  
 \*\*\* End of Report \*\*\*  
 =====

Injection Date : 1/31/2014 1:15:03 PM  
 Sample Name : JC11079 LINEAR  
 Acq. Operator : MK  
 Acq. Instrument : Instrument 1  
 Different Inj Volume from Sequence : Inj Volume : 15 µl  
 Last changed : 12/28/2013 4:11:34 PM by MK  
 Analysis Method : C:\HPCHEM\1\METHODS\A0005-40.M  
 Last changed : 8/2/2014 11:58:47 PM by MK  
 (modified after loading)

=====  
 Area Percent Report  
 =====  
 Sorted By : Signal  
 Multiplier : 1.0000  
 Dilution : 1.0000  
 Use Multiplier & Dilution Factor with ISTDs

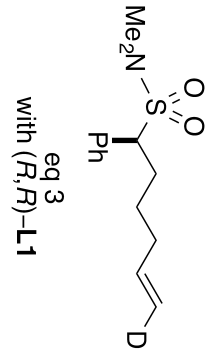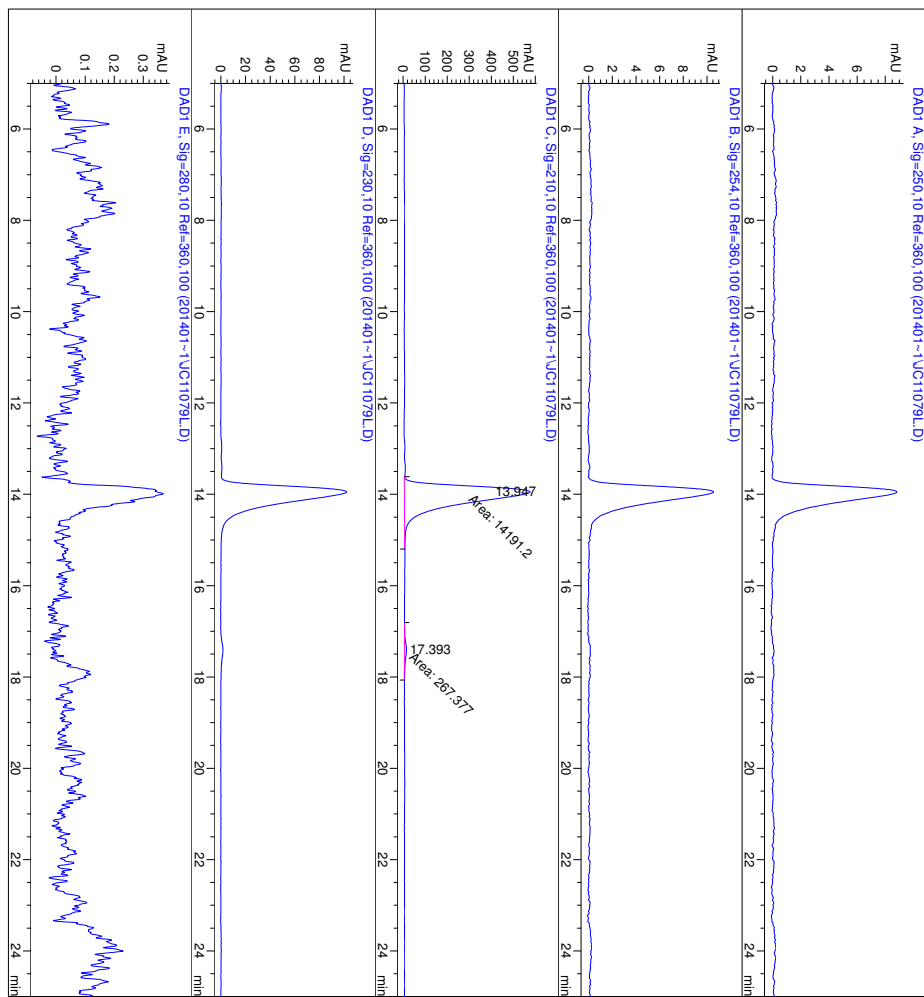

| Signal   | RetTime [min] | Type | Width [min] | Area [mAU*s] | Height [mAU] | Area %  |
|----------|---------------|------|-------------|--------------|--------------|---------|
| Signal 1 | 13.947        | FM   | 0.4147      | 14,912e4     | 570.28912    | 98.1507 |
| Signal 2 | 17.393        | MM   | 0.4723      | 267.37726    | 9.43601      | 1.8493  |

Totals : 1.44586e4 579.72513  
 Results obtained with enhanced integrator!  
 Signal 4: DAD1 D, Sig=230,10 Ref=360,100  
 Signal 5: DAD1 E, Sig=280,10 Ref=360,100



=====  
 Injection Date : 8/1/2014 10:06:30 PM      Seq. Line : 2  
 Sample Name : JCI12075A                      Location : Vial 19  
 Acq. Operator : MK                            Inj : 1  
 Acq. Instrument : Instrument 1                Inj Volume : 15 µl  
 Different Inj Volume from Sequence !        Actual Inj Volume : 4 µl  
 Acq. Method : C:\HPCHEM\1\METHODS\07-05-30.M  
 Last changed : 8/1/2014 10:12:37 PM by MK  
 (modified after loading)  
 Analysis Method : C:\HPCHEM\1\METHODS\AD005-40.M  
 Last changed : 8/2/2014 12:51:14 PM by MK  
 (modified after loading)

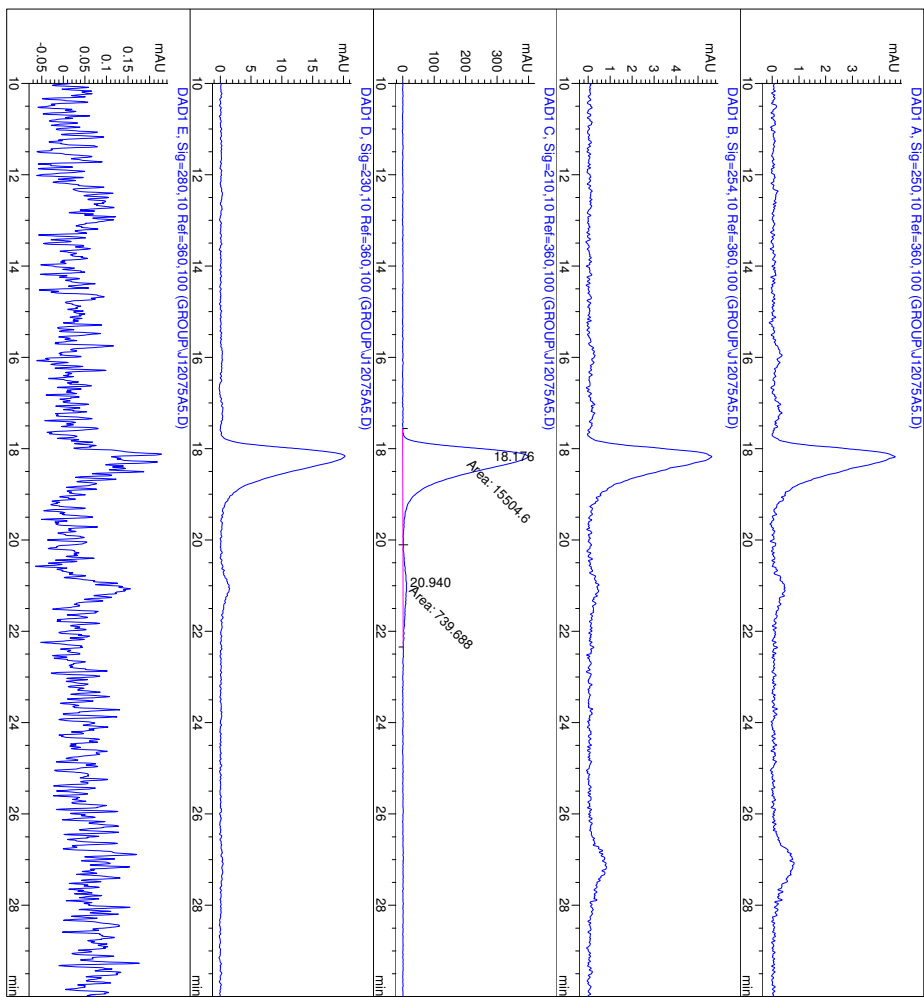

=====  
 Area Percent Report  
 =====

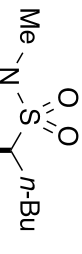

Table 5, entry 1  
 with (3R,8S)-L6

| Sorted By                                   | Signal        |      |             |              |              |         |
|---------------------------------------------|---------------|------|-------------|--------------|--------------|---------|
| Multiplier                                  | : 1.0000      |      |             |              |              |         |
| Dilution                                    | : 1.0000      |      |             |              |              |         |
| Use Multiplier & Dilution Factor with ISTDs |               |      |             |              |              |         |
| Signal 1: DADI A, Sig=250,10 Ref=360,100    |               |      |             |              |              |         |
| Signal 2: DADI B, Sig=254,10 Ref=360,100    |               |      |             |              |              |         |
| Signal 3: DADI C, Sig=210,10 Ref=360,100    |               |      |             |              |              |         |
| Peak #                                      | RetTime [min] | Type | Width [min] | Area [mAU*s] | Height [mAU] | Area %  |
| 1                                           | 18.176        | MF   | 0.6470      | 1.55046e4    | 399.41086    | 95.4465 |
| 2                                           | 20.940        | FM   | 1.0783      | 739.68774    | 11.43283     | 4.5335  |
| Totals :                                    |               |      |             | 1.62443e4    | 410.84368    |         |

Results obtained with enhanced integrator!

Signal 4: DADI D, Sig=230,10 Ref=360,100  
 Signal 5: DADI E, Sig=280,10 Ref=360,100

\*\*\* End of Report \*\*\*

=====  
 Injection Date : 8/1/2014 10:47:48 PM      Seq. Line : 3  
 Sample Name : JCI12075B                      Location : Vial 20  
 Acq. Operator : MK                            Inj : 1  
 Acq. Instrument : Instrument 1                Inj Volume : 15 µl  
 Different Inj Volume from Sequence !        Actual Inj Volume : 4 µl  
 Acq. Method : C:\HPCHEM\1\METHODS\OJ-05-30.M  
 Last changed : 8/1/2014 10:12:37 PM by MK  
 (modified after Loading)  
 Analysis Method : C:\HPCHEM\1\METHODS\AD005-40.M  
 Last changed : 8/2/2014 12:51:14 PM by MK  
 (modified after Loading)

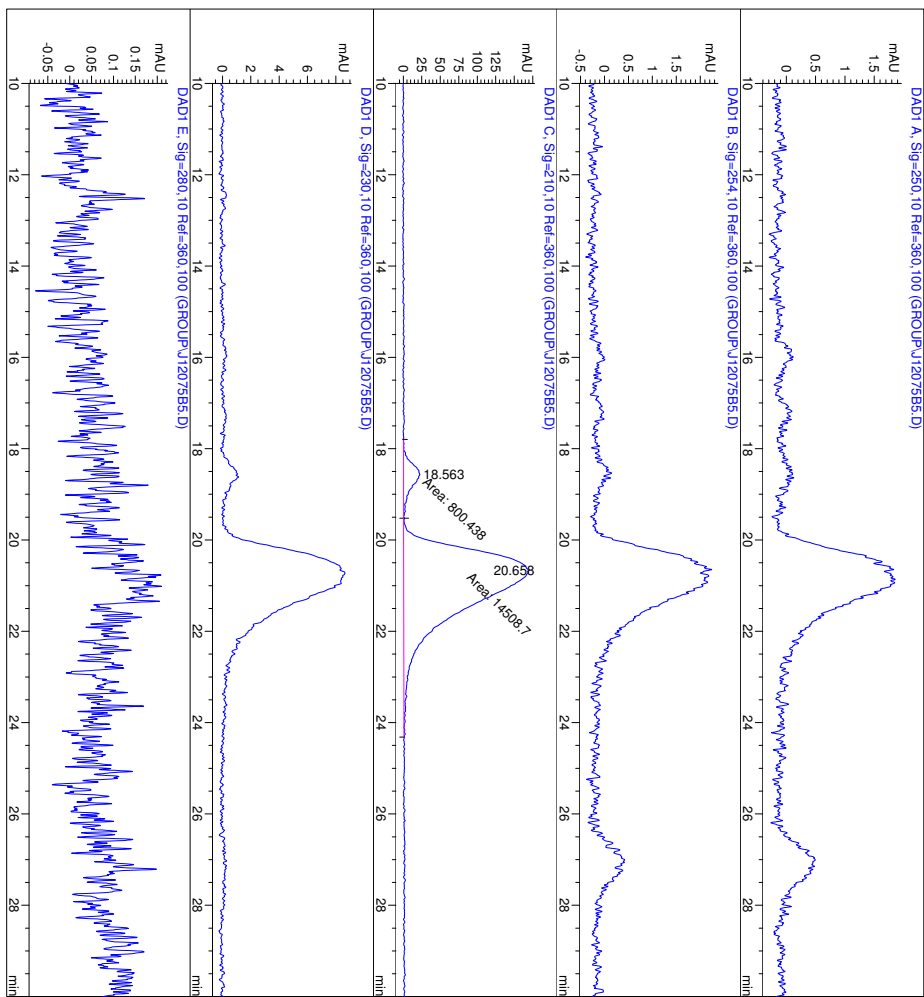

=====  
 Area Percent Report  
 =====

Sorted By : Signal  
 Multiplier : 1.0000  
 Dilution : 1.0000  
 Use Multiplier & Dilution Factor with ISTDs

Signal 1: DADI A, Sig=250,10 Ref=360,100  
 Signal 2: DADI B, Sig=254,10 Ref=360,100

| Peak # | RetTime [min] | Type | Width [min] | Area [mAU*s] | Height [mAU] | Area %  |
|--------|---------------|------|-------------|--------------|--------------|---------|
| 1      | 18.563        | MF   | 0.6055      | 800.43811    | 22.03275     | 5.2285  |
| 2      | 20.658        | FM   | 1.4329      | 14508.764    | 168.75829    | 94.7715 |

Totals : 1.53092e4 190.79103  
 Results obtained with enhanced integrator!  
 Signal 4: DADI D, Sig=230,10 Ref=360,100  
 Signal 5: DADI E, Sig=280,10 Ref=360,100

\*\*\* End of Report \*\*\*

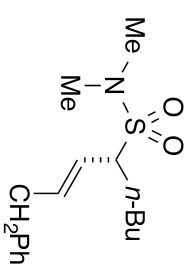

Table 5, entry 1  
 with (3S,8R)-L6

=====  
 Injection Date : 9/4/2013 1:38:06 PM      Seq. Line : 11  
 Sample Name : JC10275                      Location : Vial 9  
 Acq. Operator : MK                            Inj : 1  
 Acq. Instrument : Instrument 1              Inj Volume : 15 µl  
 Different Inj Volume from Sequence !  
 Actual Inj Volume : 5 µl  
 Acq. Method : C:\HPCHEM\1\METHODS\JC-ADD01A.M  
 Last changed : 11/14/2012 10:39:31 PM by CE  
 Analysis Method : C:\HPCHEM\1\METHODS\ADD005-40.M  
 Last changed : 8/3/2014 12:34:42 AM by MK  
 (modified after loading)

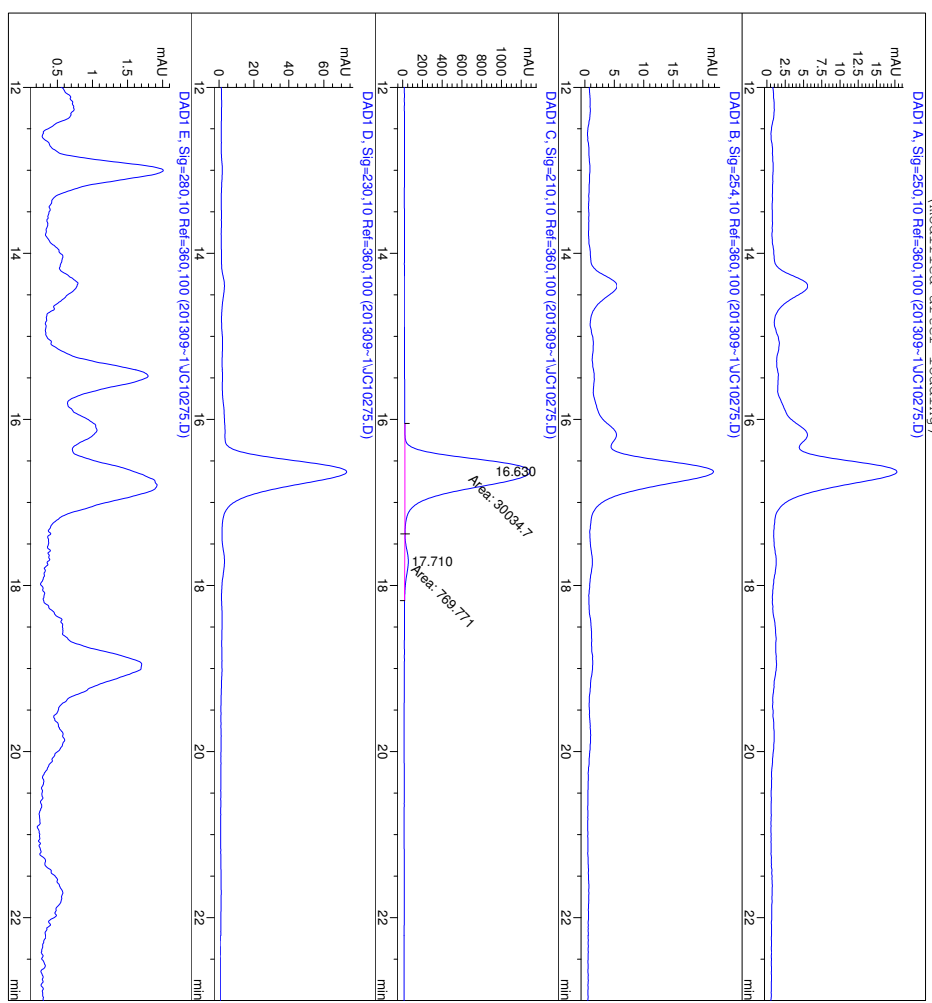

=====  
 Area Percent Report  
 =====  
 Sorted By : Signal  
 Multiplier : 1.0000  
 Dilution : 1.0000  
 Use Multiplier & Dilution Factor with ISTDs

Signal 1: DAD1 A, Sig=250,10 Ref=360,100  
 Signal 2: DAD1 B, Sig=254,10 Ref=360,100  
 Signal 3: DAD1 C, Sig=210,10 Ref=360,100

| Peak # | RetTime [min] | Type | Width [min] | Area [mAU*s] | Height [mAU] | Area %  |
|--------|---------------|------|-------------|--------------|--------------|---------|
| 1      | 16.630        | MM   | 0.3948      | 3.00347e4    | 1267.95288   | 97.5011 |
| 2      | 17.710        | MM   | 0.3597      | 769.77083    | 35.66695     | 2.4989  |

Totals : 3.08045e4 1303.61983  
 Results obtained with enhanced integrator!  
 Signal 4: DAD1 D, Sig=230,10 Ref=360,100  
 Signal 5: DAD1 E, Sig=280,10 Ref=360,100

\*\*\* End of Report \*\*\*

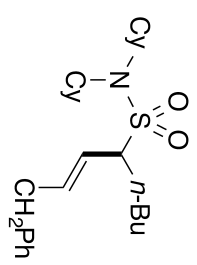

Table 5, entry 2  
 with (3*R*,8*S*)-L6

=====  
 Injection Date : 9/4/2013 2:19:25 PM      Seq. Line : 12  
 Sample Name : JC9113                              Location : Vial 10  
 Acq. Operator : MK                                Inj : 1  
 Acq. Instrument : Instrument 1                    Inj Volume : 15 µl  
 Different Inj Volume from Sequence 1          Actual Inj Volume : 5 µl  
 Acq. Method : C:\HPCHEM\1\METHODS\JC-AD01A.M  
 Last changed : 11/14/2012 10:39:31 PM by CE  
 Analysis Method : C:\HPCHEM\1\METHODS\AD005-40.M  
 Last changed : 8/2/2014 12:18:32 AM by MK  
 (modified after loading)

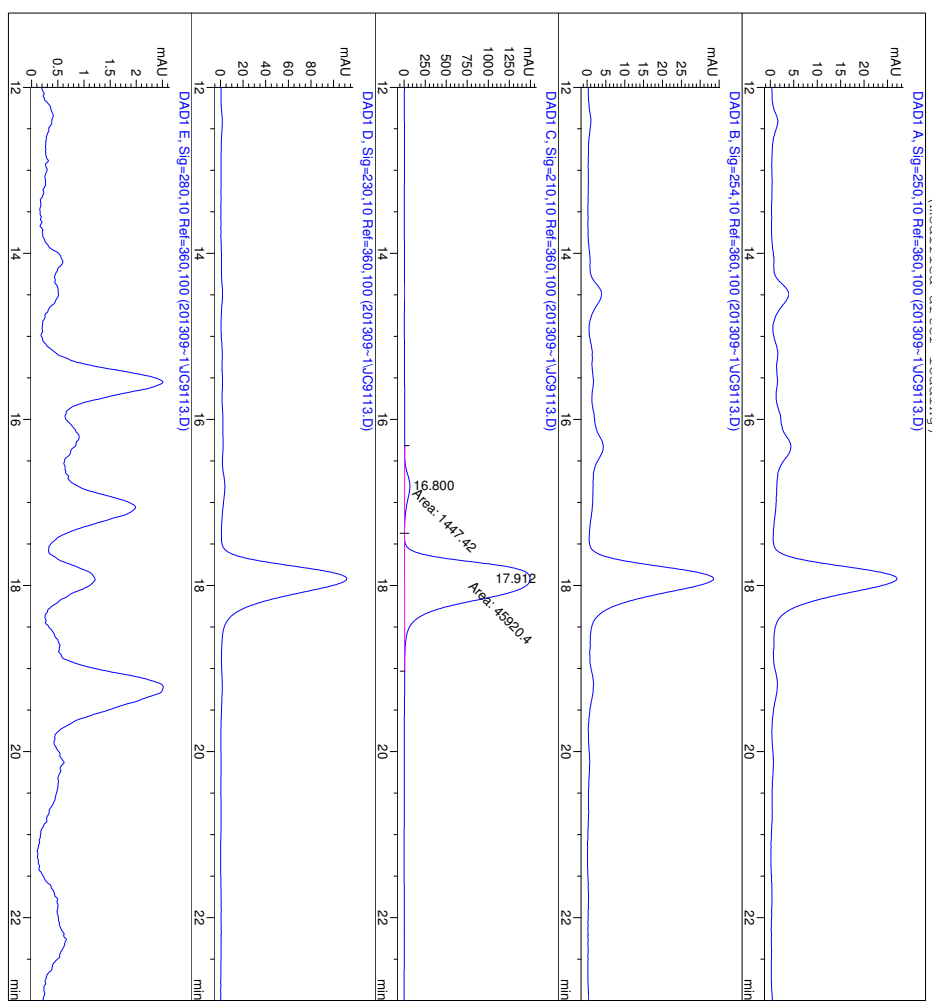

=====  
 Area Percent Report  
 =====  
 Sorted By : Signal  
 Multiplier : 1.0000  
 Dilution : 1.0000  
 Use Multiplier & Dilution Factor with ISTDs

| Signal                                   | RetTime [min] | Type | Width [min] | Area [mAU*s] | Height [mAU] | Area %  |
|------------------------------------------|---------------|------|-------------|--------------|--------------|---------|
| Signal 1: DAD1 A, Sig=250,10 Ref=360,100 | 16.800        | MM   | 0.3820      | 1447.42444   | 63.15571     | 3.0557  |
| Signal 2: DAD1 B, Sig=254,10 Ref=360,100 | 17.912        | MM   | 0.5129      | 4.59204e4    | 1492.23425   | 96.9443 |

Totals : 4.73678e4 1555.38996  
 Results obtained with enhanced integrator!  
 Signal 4: DAD1 D, Sig=230,10 Ref=360,100  
 Signal 5: DAD1 E, Sig=280,10 Ref=360,100  
 \*\*\*\*\*  
 \*\*\* End of Report \*\*\*  
 \*\*\*\*\*

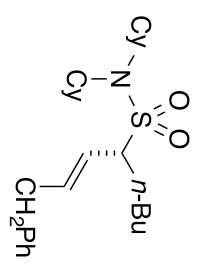

Table 5, entry 2  
 with (3S,8R)-L6

Injection Date : 10/22/2013 5:01:30 PM  
 Sample Name : JCI1025A  
 Acq. Operator : MK  
 Acq. Instrument : Instrument 1  
 Different Inj Volume from Sequence : Actual Inj Volume : 15 µl  
 Inj Volume : 3 µl  
 Last changed : 10/22/2013 9:47:57 AM by MK  
 Analysis Method : C:\HPCHEM\1\METHODS\AD005-40.M  
 Last changed : 7/30/2014 10:35:34 PM by MK  
 (modified after loading)

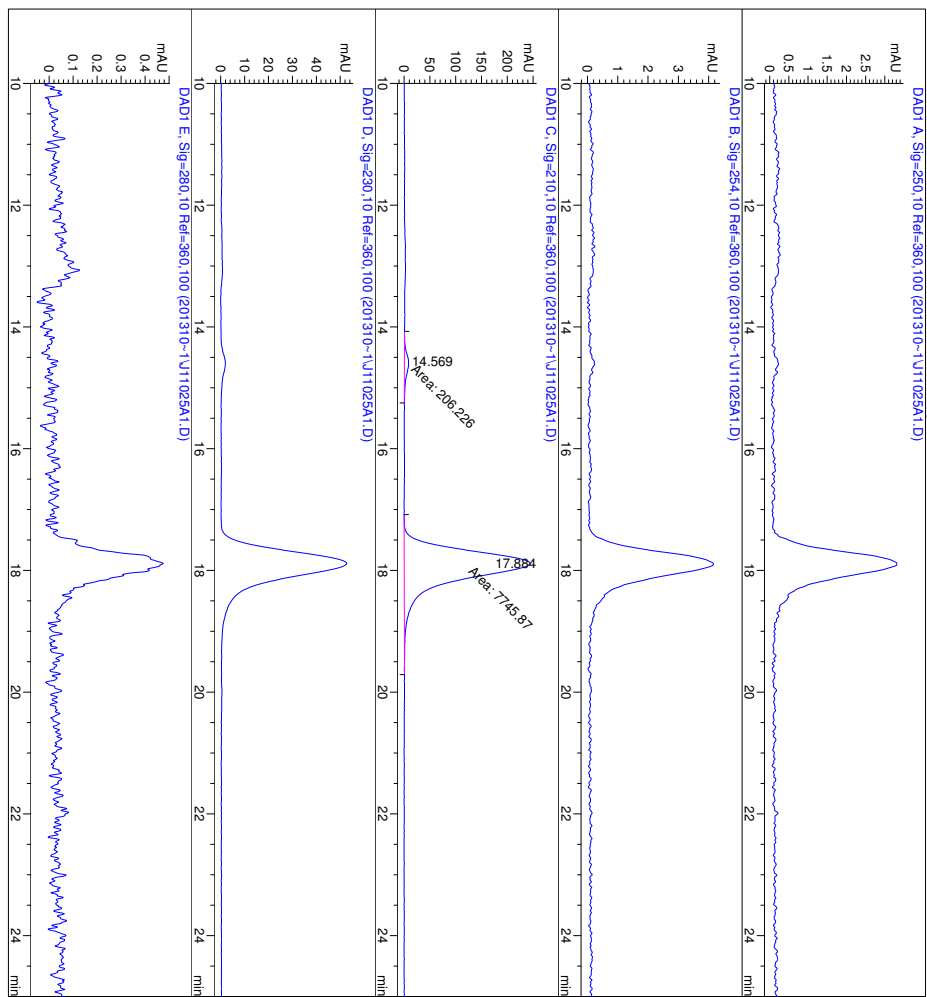

Area Percent Report  
 Sorted By : Signal  
 Multiplier : 1.0000  
 Dilution : 1.0000  
 Use Multiplier & Dilution Factor with ISTDs

| Signal                                   | RetTime [min] | Type | Width [min] | Area [mAU*s] | Height [mAU] | Area %  |
|------------------------------------------|---------------|------|-------------|--------------|--------------|---------|
| Signal 1: DAD1 A, Sig=250,10 Ref=360,100 | 14.569        | MM   | 0.4233      | 206.22578    | 8.11952      | 2.5934  |
| Signal 2: DAD1 B, Sig=254,10 Ref=360,100 | 17.884        | MM   | 0.5286      | 7745.87012   | 244.24510    | 97.4066 |
| Totals :                                 |               |      |             | 7952.09590   | 252.36462    |         |

Results obtained with enhanced integrator!

Signal 4: DAD1 D, Sig=230,10 Ref=360,100  
 Signal 5: DAD1 E, Sig=280,10 Ref=360,100

\*\*\* End of Report \*\*\*

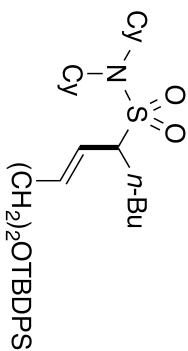

Table 5, entry 3  
 with (3R,8S)-L6

=====  
Injection Date : 10/22/2013 5:42:45 PM      Seq. Line : 9  
Sample Name : JC11025B                            Location : Vial 10  
Acq. Operator : MK                                Inj : 1  
Acq. Instrument : Instrument 1                   Inj Volume : 15 µl  
Different Inj Volume from Sequence 1          Actual Inj Volume : 3 µl  
Acq. Method : C:\HPCHEM\1\METHODS\AD005-40.M  
Last changed : 10/22/2013 9:47:57 AM by MK  
Analysis Method : C:\HPCHEM\1\METHODS\AD005-40.M  
Last changed : 8/2/2014 12:21:07 AM by MK  
                                                      (modified after loading)

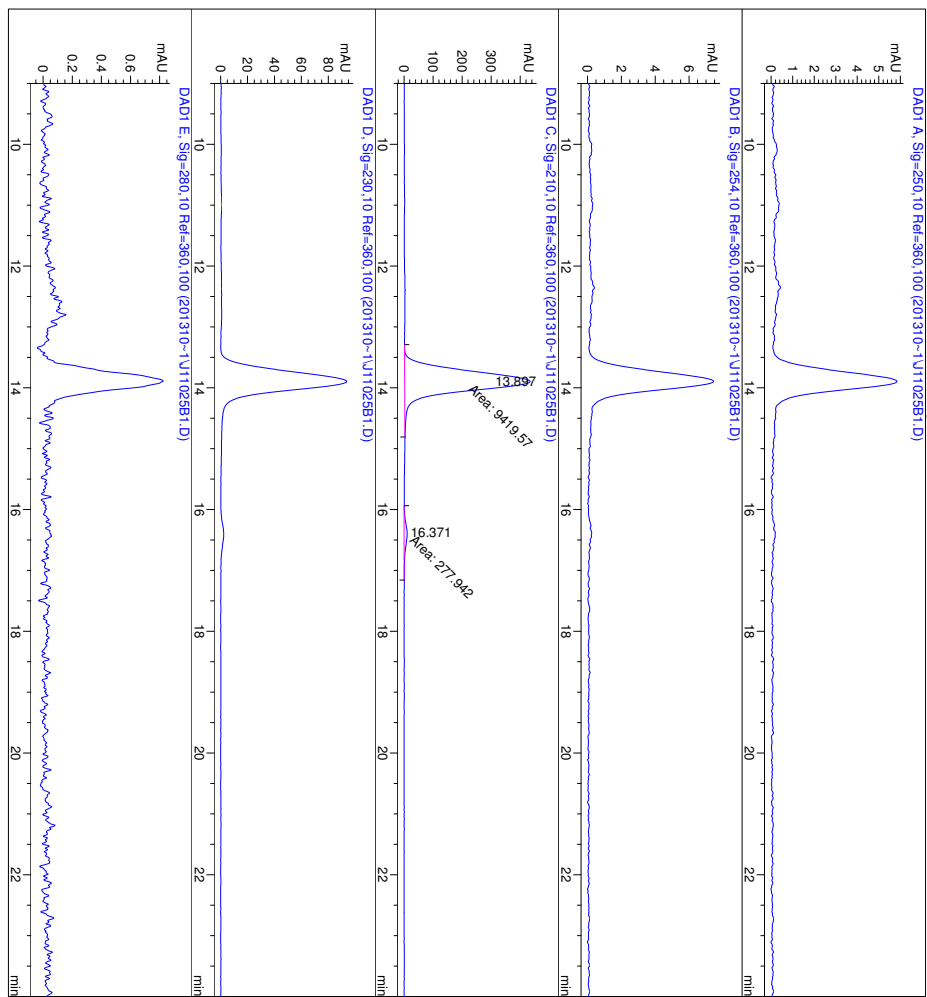

=====  
Area Percent Report  
=====  
Sorted By : Signal  
Multiplier : 1.0000  
Dilution : 1.0000  
Use Multiplier & Dilution Factor with ISTDs

Signal 1: DADI A, Sig=250,10 Ref=360,100  
Signal 2: DADI B, Sig=254,10 Ref=360,100  
Signal 3: DADI C, Sig=210,10 Ref=360,100

| Peak # | RetTime [min] | Type | Width [min] | Area [mAU*s] | Height [mAU] | Area %  |
|--------|---------------|------|-------------|--------------|--------------|---------|
| 1      | 13.897        | MM   | 0.3634      | 9419.56641   | 432.00473    | 97.1339 |
| 2      | 16.371        | MM   | 0.4602      | 277.94183    | 10.06597     | 2.8861  |

Totals : 9697.50824 442.07070

Results obtained with enhanced integrator!

Signal 4: DADI D, Sig=230,10 Ref=360,100

Signal 5: DADI E, Sig=280,10 Ref=360,100

=====  
\*\*\* End of Report \*\*\*  
=====

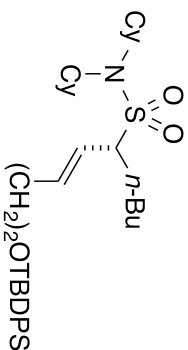

Table 5, entry 3  
with (3S,8R)-L6

=====  
Injection Date : 9/16/2013 1:56:44 PM      Seq. Line : 9  
Sample Name : JCI0279B                      Location : Vial 95  
Acq. Operator : MK                            Inj : 1  
Acq. Instrument : Instrument 1              Inj Volume : 15 µl  
Different Inj Volume from Sequence !  
Accr. Method : C:\HPCHEM\1\METHODS\AD-10-40.M      Actual Inj Volume : 1 µl  
Last changed : 7/12/2012 11:12:25 AM by CE  
Analysis Method : C:\HPCHEM\1\METHODS\AD005-40.M  
Last changed : 8/3/2014 12:46:07 AM by MK  
(modified after loading)

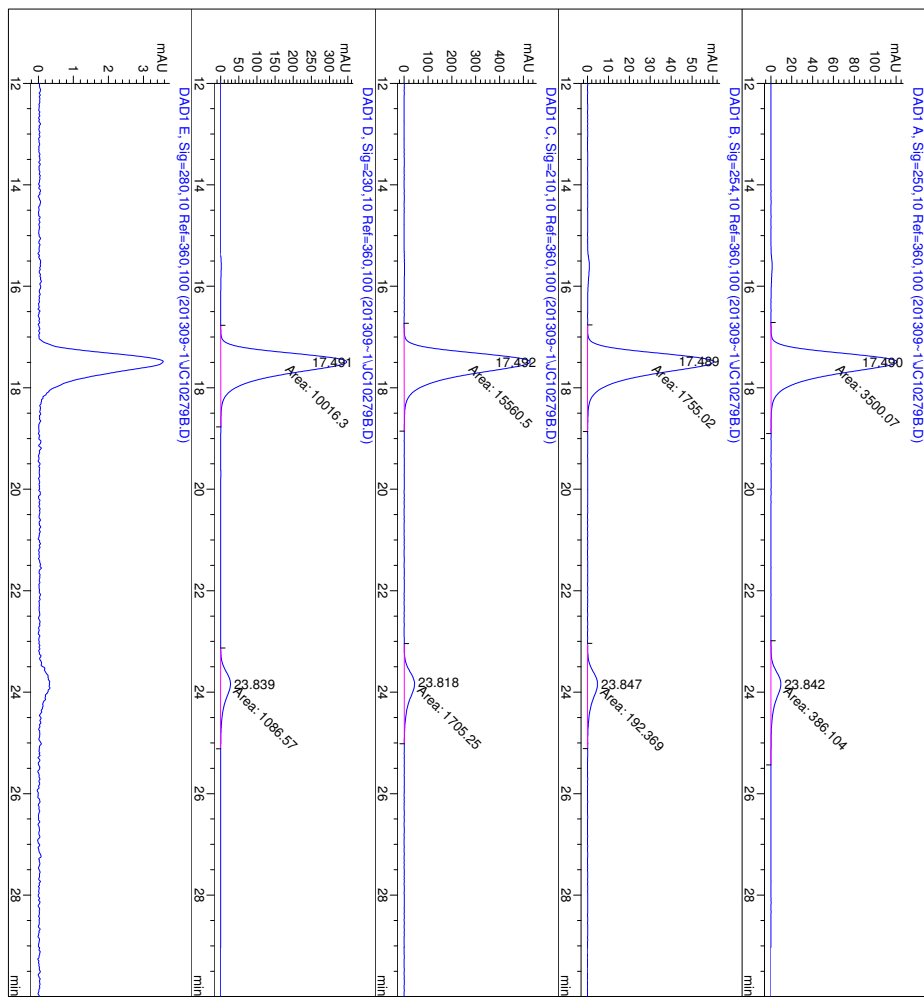

=====  
Area Percent Report  
Sorted By : Signal  
Multiplier : 1.0000  
Dilution : 1.0000  
Use Multiplier & Dilution Factor with ISTDs

| Signal                                   | Peak RetTime [min] | Width [min] | Area [mAU*s] | Height [mAU] | Area %  |
|------------------------------------------|--------------------|-------------|--------------|--------------|---------|
| Signal 1: DADI A, Sig=250,10 Ref=360,100 | 17.490             | 0.4828      | 3500.07324   | 120.82352    | 90.0647 |
|                                          | 23.842             | 0.6752      | 386.10425    | 9.53050      | 9.9353  |
| Totals :                                 |                    |             | 3886.17749   | 130.35402    |         |

| Signal                                   | Peak RetTime [min] | Width [min] | Area [mAU*s] | Height [mAU] | Area %  |
|------------------------------------------|--------------------|-------------|--------------|--------------|---------|
| Signal 2: DADI B, Sig=254,10 Ref=360,100 | 17.489             | 0.4850      | 1755.02209   | 60.31308     | 90.1217 |
|                                          | 23.847             | 0.6731      | 192.36926    | 4.76325      | 9.8783  |
| Totals :                                 |                    |             | 1947.39136   | 65.07632     |         |

| Signal                                   | Peak RetTime [min] | Width [min] | Area [mAU*s] | Height [mAU] | Area %  |
|------------------------------------------|--------------------|-------------|--------------|--------------|---------|
| Signal 3: DADI C, Sig=210,10 Ref=360,100 | 17.492             | 0.4910      | 1.55605e4    | 528.16541    | 90.1235 |
|                                          | 23.818             | 0.6559      | 1705.25134   | 43.32966     | 9.8765  |
| Totals :                                 |                    |             | 1.72657e4    | 571.49507    |         |

| Signal                                   | Peak RetTime [min] | Width [min] | Area [mAU*s] | Height [mAU] | Area %  |
|------------------------------------------|--------------------|-------------|--------------|--------------|---------|
| Signal 4: DADI D, Sig=230,10 Ref=360,100 | 17.491             | 0.4814      | 1.00163e4    | 346.80835    | 90.2137 |
|                                          | 23.839             | 0.6694      | 1086.56787   | 27.05270     | 9.7863  |
| Totals :                                 |                    |             | 1.11029e4    | 373.86105    |         |

Results obtained with enhanced integrator!  
Signal 5: DADI E, Sig=280,10 Ref=360,100  
\*\*\* End of Report \*\*\*

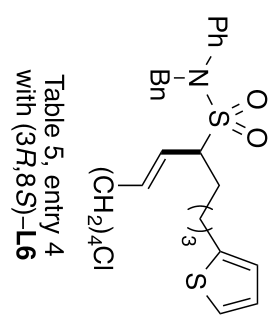

=====  
 Injection Date : 9/16/2013 1:15:30 PM      Seq. Line : 8  
 Sample Name : JCI0279A                      Location : Vial 94  
 Acq. Operator : MK                            Inj : 1  
 Acq. Instrument : Instrument 1              Inj Volume : 15 µl  
 Different Inj Volume from Sequence !  
 Actual Inj Volume : 1 µl  
 Acq. Method : C:\HPCHEM\1\METHODS\AD-10-40.M  
 Last changed : 7/12/2012 11:12:25 AM by CE  
 Analysis Method : C:\HPCHEM\1\METHODS\AD005-40.M  
 Last changed : 8/2/2014 12:24:51 AM by MK  
 (modified after loading)

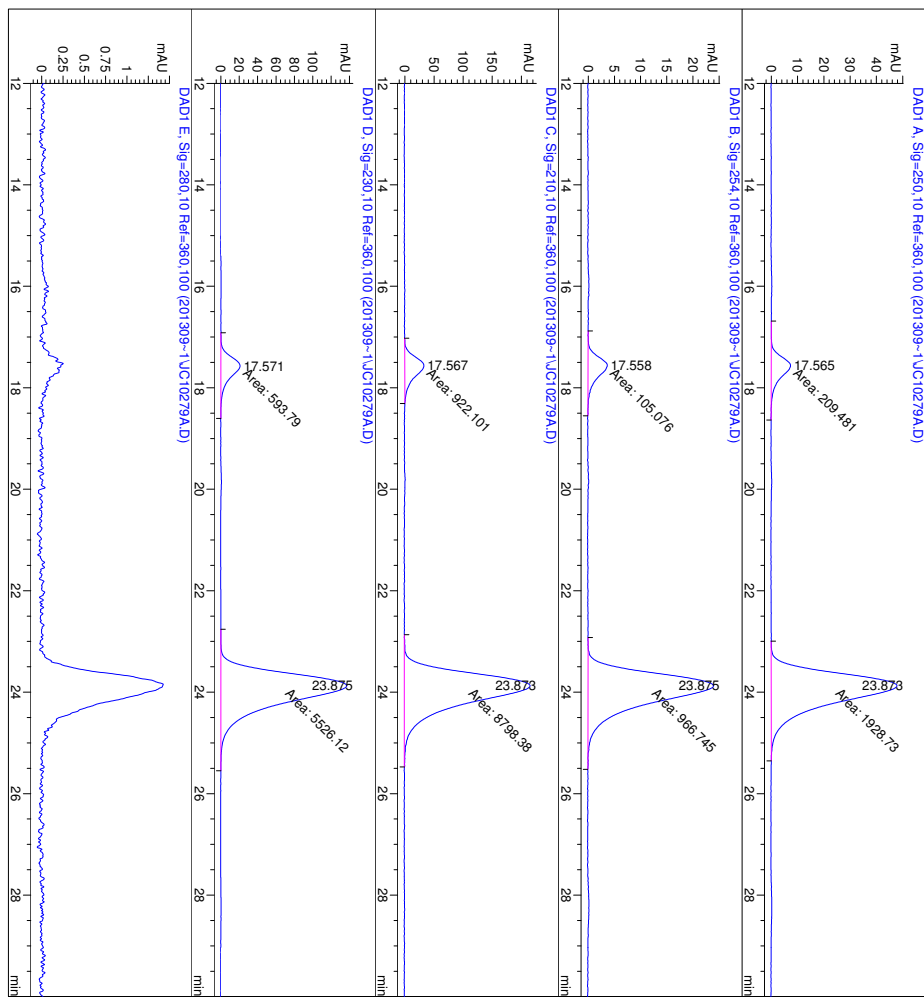

=====  
 Area Percent Report  
 =====  
 Sorted By : Signal  
 Multiplier : 1.0000  
 Dilution : 1.0000  
 Use Multiplier & Dilution Factor with ISTDs

Signal 1: DADI A, Sig=250,10 Ref=360,100

| Peak #   | RetTime [min] | Type | Width [min] | Area [mAU*s] | Height [mAU] | Area %  |
|----------|---------------|------|-------------|--------------|--------------|---------|
| 1        | 17.565        | MM   | 0.4749      | 209.48149    | 7.35103      | 9.7971  |
| 2        | 23.873        | MM   | 0.6716      | 1928.72815   | 47.86718     | 90.2029 |
| Totals : |               |      |             | 2138.20964   | 55.21821     |         |

Results obtained with enhanced integrator!

Signal 2: DADI B, Sig=254,10 Ref=360,100

| Peak #   | RetTime [min] | Type | Width [min] | Area [mAU*s] | Height [mAU] | Area %  |
|----------|---------------|------|-------------|--------------|--------------|---------|
| 1        | 17.558        | MM   | 0.4747      | 105.07636    | 3.68929      | 9.8035  |
| 2        | 23.875        | MM   | 0.6715      | 966.74506    | 23.99374     | 90.1965 |
| Totals : |               |      |             | 1071.82142   | 27.68303     |         |

Results obtained with enhanced integrator!

Signal 3: DADI C, Sig=210,10 Ref=360,100

| Peak #   | RetTime [min] | Type | Width [min] | Area [mAU*s] | Height [mAU] | Area %  |
|----------|---------------|------|-------------|--------------|--------------|---------|
| 1        | 17.567        | MM   | 0.4652      | 922.10120    | 33.03711     | 9.4862  |
| 2        | 23.873        | MM   | 0.6781      | 8798.38086   | 216.24049    | 90.5138 |
| Totals : |               |      |             | 9720.48206   | 249.27760    |         |

Results obtained with enhanced integrator!

Signal 4: DADI D, Sig=230,10 Ref=360,100

| Peak #   | RetTime [min] | Type | Width [min] | Area [mAU*s] | Height [mAU] | Area %  |
|----------|---------------|------|-------------|--------------|--------------|---------|
| 1        | 17.571        | MM   | 0.4736      | 593.79047    | 20.89495     | 9.7026  |
| 2        | 23.875        | MM   | 0.6721      | 5526.11816   | 137.03973    | 90.2974 |
| Totals : |               |      |             | 6119.90863   | 157.93469    |         |

Results obtained with enhanced integrator!

Signal 5: DADI E, Sig=280,10 Ref=360,100

=====  
 \*\*\* End of Report \*\*\*

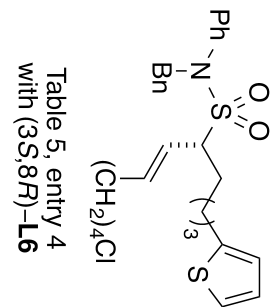

Table 5, entry 4  
 with (3S,8R)-L6



=====  
 Injection Date : 9/17/2013 5:04:56 AM      Seq. Line : 24  
 Sample Name : JCI0281B                      Location : Vial 97  
 Acq. Operator : MK                            Inj : 1  
 Acq. Instrument : Instrument 1              Inj Volume : 15 µl  
 Different Inj Volume from Sequence !  
 Actual Inj Volume : 6 µl  
 Acq. Method : C:\HPCHEM\1\METHODS\AS-10-40.M  
 Last changed : 9/3/2013 3:07:57 PM by MK  
 Analysis Method : C:\HPCHEM\1\METHODS\OD-02-20.M  
 Last changed : 7/30/2014 10:40:14 PM by MK  
 (modified after loading)

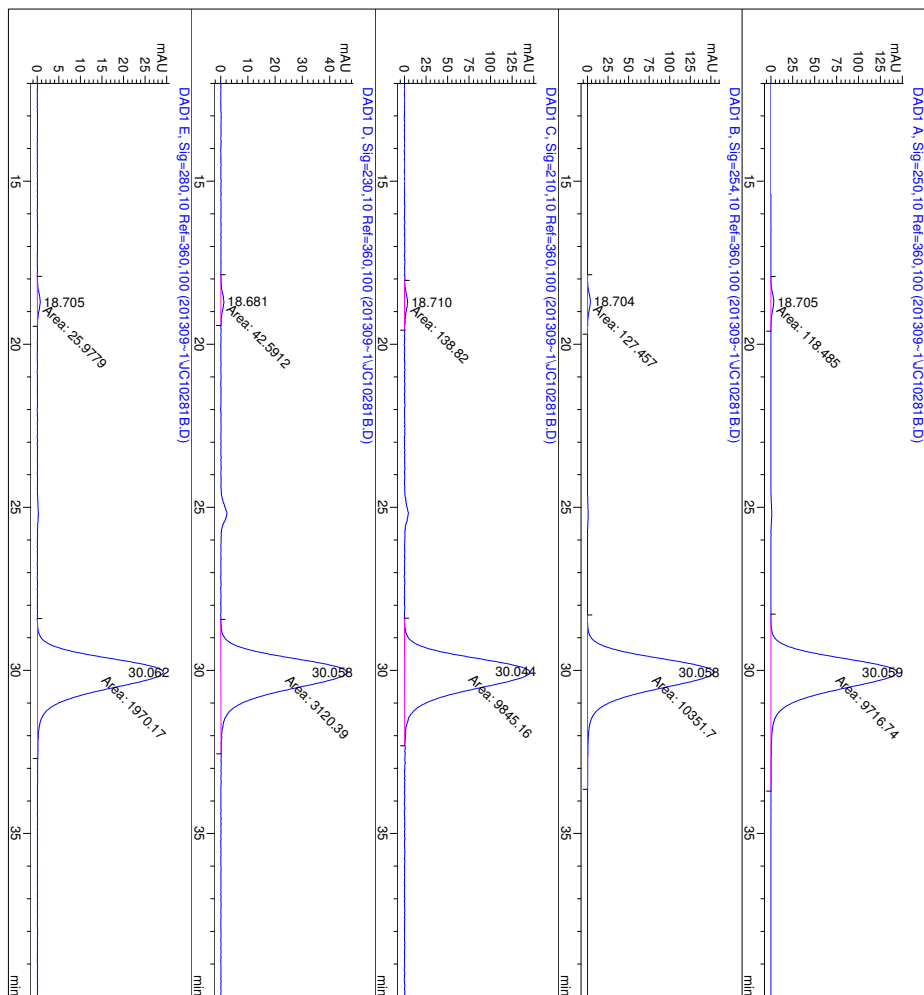

=====  
 Area Percent Report  
 =====  
 Sorted By : Signal  
 Multiplier : 1.0000  
 Dilution : 1.0000  
 Use Multiplier & Dilution Factor with ISTDs

Signal 1: DADI A, Sig=250,10 Ref=360,100

| Peak #   | RetTime [min] | Type | Width [min] | Area [mAU*s] | Height [mAU] | Area %  |
|----------|---------------|------|-------------|--------------|--------------|---------|
| 1        | 18.705        | MM   | 0.6218      | 118.48459    | 3.17571      | 1.2047  |
| 2        | 30.059        | MM   | 1.1259      | 9716.74219   | 143.83633    | 98.7953 |
| Totals : |               |      |             | 9835.22678   | 147.01204    |         |

Results obtained with enhanced integrator!

Signal 2: DADI B, Sig=254,10 Ref=360,100

| Peak #   | RetTime [min] | Type | Width [min] | Area [mAU*s] | Height [mAU] | Area %  |
|----------|---------------|------|-------------|--------------|--------------|---------|
| 1        | 18.704        | MM   | 0.6262      | 127.45731    | 3.39228      | 1.2163  |
| 2        | 30.058        | MM   | 1.1261      | 1.03517e4    | 153.21146    | 98.7837 |
| Totals : |               |      |             | 1.04792e4    | 156.60374    |         |

Results obtained with enhanced integrator!

Signal 3: DADI C, Sig=210,10 Ref=360,100

| Peak #   | RetTime [min] | Type | Width [min] | Area [mAU*s] | Height [mAU] | Area %  |
|----------|---------------|------|-------------|--------------|--------------|---------|
| 1        | 18.710        | MM   | 0.6299      | 138.81970    | 3.67318      | 1.3904  |
| 2        | 30.044        | MM   | 1.1245      | 9845.16113   | 145.92497    | 98.6096 |
| Totals : |               |      |             | 9983.98083   | 149.59815    |         |

Results obtained with enhanced integrator!

Signal 4: DADI D, Sig=230,10 Ref=360,100

| Peak #   | RetTime [min] | Type | Width [min] | Area [mAU*s] | Height [mAU] | Area %  |
|----------|---------------|------|-------------|--------------|--------------|---------|
| 1        | 18.681        | MM   | 0.6396      | 42.59124     | 1.10979      | 1.3466  |
| 2        | 30.058        | MM   | 1.1261      | 3120.39331   | 46.18145     | 98.6534 |
| Totals : |               |      |             | 3162.98455   | 47.29125     |         |

Results obtained with enhanced integrator!

Signal 5: DADI E, Sig=280,10 Ref=360,100

| Peak #   | RetTime [min] | Type | Width [min] | Area [mAU*s] | Height [mAU] | Area %  |
|----------|---------------|------|-------------|--------------|--------------|---------|
| 1        | 18.705        | MM   | 0.6513      | 25.97787     | 6.64763e-1   | 1.3014  |
| 2        | 30.062        | MM   | 1.1250      | 1970.16589   | 29.18823     | 98.6986 |
| Totals : |               |      |             | 1996.14376   | 29.85299     |         |

Results obtained with enhanced integrator!

=====  
 \*\*\* End of Report \*\*\*

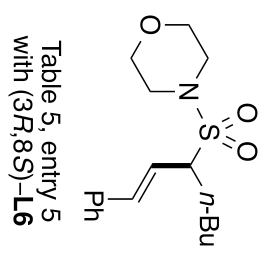

Injection Date : 9/17/2013 4:23:37 AM  
 Sample Name : JCI0281A  
 Acq. Operator : MK  
 Acq. Instrument : Instrument 1  
 Different Inj Volume from Sequence :  
 Last changed : 9/3/2013 3:07:57 PM by MK  
 Analysis Method : C:\HPCHEM\1\METHODS\AS-10-40.M  
 Last changed : 8/2/2014 12:27:30 AM by MK  
 (modified after loading)

Seq. Line : 23  
 Location : Vial 96  
 Inj : 1  
 Inj Volume : 15 µl  
 Actual Inj Volume : 3 µl

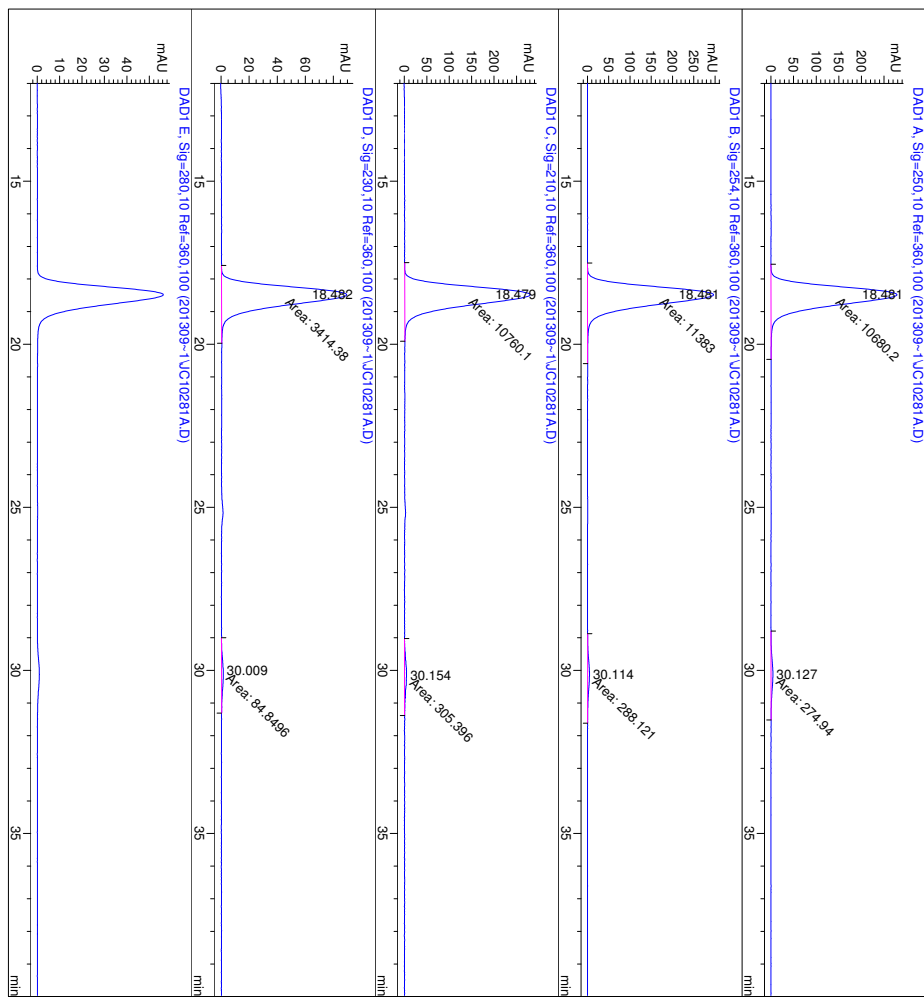

Area Percent Report  
 Sorted By : Signal  
 Multiplier : 1.0000  
 Dilution : 1.0000  
 Use Multiplier & Dilution Factor with ISTDs

| Signal   | Peak RetTime [min] | Type | Width [min] | Area [mAU*s] | Height [mAU] | Area %  |
|----------|--------------------|------|-------------|--------------|--------------|---------|
| 1        | 18.481             | MM   | 0.6395      | 1.06802e4    | 278.33743    | 97.4903 |
| 2        | 30.127             | MM   | 1.1077      | 274.94009    | 4.13675      | 2.5097  |
| Totals : |                    |      |             | 1.09552e4    | 282.47418    |         |

Results obtained with enhanced integrator!

| Signal   | Peak RetTime [min] | Type | Width [min] | Area [mAU*s] | Height [mAU] | Area %  |
|----------|--------------------|------|-------------|--------------|--------------|---------|
| 1        | 18.481             | MM   | 0.6401      | 1.13830e4    | 296.37387    | 97.5313 |
| 2        | 30.114             | MM   | 1.0968      | 288.12051    | 4.37829      | 2.4687  |
| Totals : |                    |      |             | 1.16711e4    | 300.75216    |         |

Results obtained with enhanced integrator!

| Signal   | Peak RetTime [min] | Type | Width [min] | Area [mAU*s] | Height [mAU] | Area %  |
|----------|--------------------|------|-------------|--------------|--------------|---------|
| 1        | 18.479             | MM   | 0.6415      | 1.07601e4    | 279.53766    | 97.2401 |
| 2        | 30.154             | MM   | 1.0830      | 305.39581    | 4.69971      | 2.7599  |
| Totals : |                    |      |             | 1.10655e4    | 284.23737    |         |

Results obtained with enhanced integrator!

| Signal   | Peak RetTime [min] | Type | Width [min] | Area [mAU*s] | Height [mAU] | Area %  |
|----------|--------------------|------|-------------|--------------|--------------|---------|
| 1        | 18.482             | MM   | 0.6382      | 3414.37500   | 89.16418     | 97.5752 |
| 2        | 30.009             | MM   | 1.0444      | 84.84958     | 1.35400      | 2.4248  |
| Totals : |                    |      |             | 3499.22458   | 90.51818     |         |

Results obtained with enhanced integrator!

Signal 5: DADI E, Sig=280,10 Ref=360,100  
 \*\*\* End of Report \*\*\*

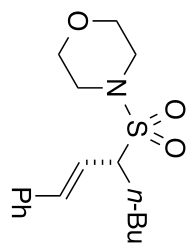

Table 5, entry 5 with (S,S)-L6

Injection Date : 2/5/2014 11:58:40 PM  
 Sample Name : JC11123  
 Acq. Operator : MK  
 Acq. Instrument : Instrument 1  
 Different Inj Volume from Sequence :  
 Last changed : 7/6/2013 9:54:10 AM by CE  
 Analysis Method : C:\HPCHEM\1\METHODS\IB-05-40.M  
 Last changed : 7/30/2014 10:42:05 PM by MK  
 (modified after loading)

Seq. Line : 2  
 Location : Vial 31  
 Inj : 1  
 Inj Volume : 15 µl  
 Actual Inj Volume : 5 µl

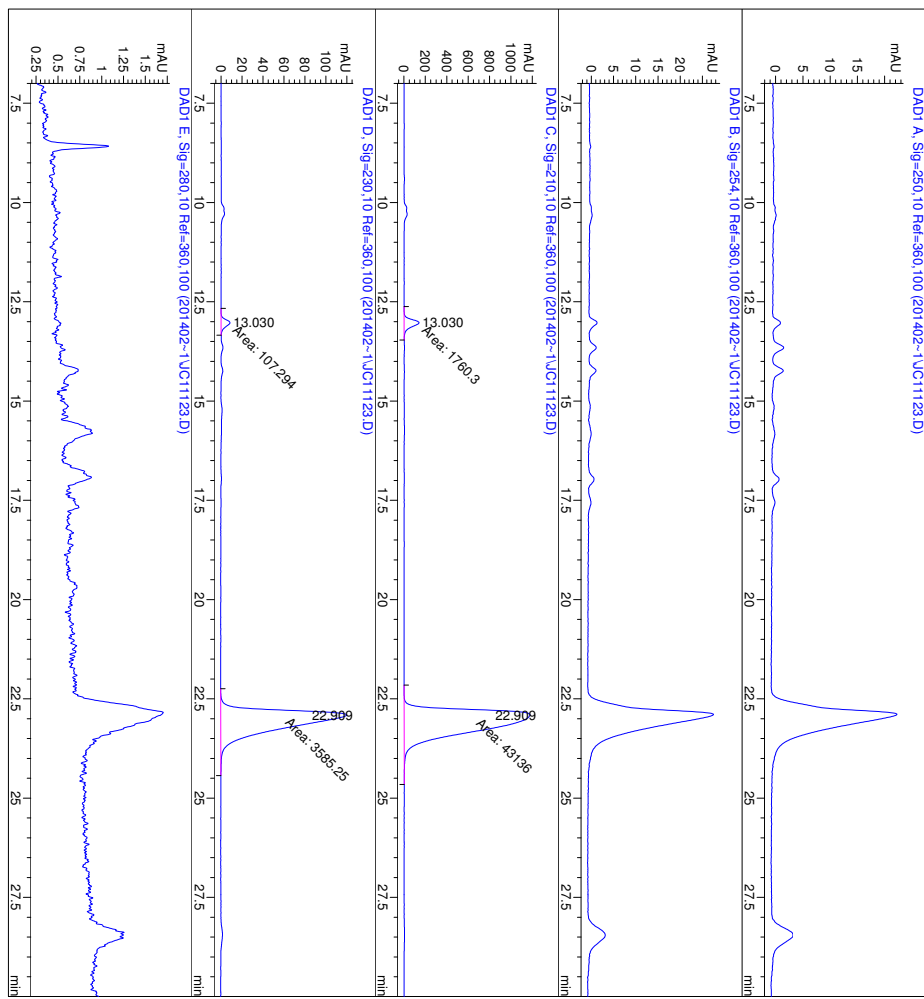

Area Percent Report

Sorted By : Signal  
 Multiplier : 1.0000  
 Dilution : 1.0000  
 Use Multiplier & Dilution Factor with ISTDs

Signal 1: DADI A, Sig=250,10 Ref=360,100

Signal 2: DADI B, Sig=254,10 Ref=360,100

Signal 3: DADI C, Sig=210,10 Ref=360,100

| Peak # | RetTime [min] | Type | Width [min] | Area [mAU*s] | Height [mAU] | Area %  |
|--------|---------------|------|-------------|--------------|--------------|---------|
| 1      | 13.030        | MF   | 0.2116      | 1760.29651   | 138.68036    | 3.9208  |
| 2      | 22.909        | MM   | 0.6103      | 4.31360e4    | 1177.93591   | 96.0792 |

Totals : 4.48962e4 1316.61627

Results obtained with enhanced integrator!

Signal 4: DADI D, Sig=230,10 Ref=360,100

| Peak # | RetTime [min] | Type | Width [min] | Area [mAU*s] | Height [mAU] | Area %  |
|--------|---------------|------|-------------|--------------|--------------|---------|
| 1      | 13.030        | MF   | 0.2092      | 107.29430    | 8.54649      | 2.9057  |
| 2      | 22.909        | MM   | 0.4974      | 3585.25415   | 120.13020    | 97.0943 |

Totals : 3692.54845 128.67670

Results obtained with enhanced integrator!

Signal 5: DADI E, Sig=280,10 Ref=360,100

\*\*\* End of Report \*\*\*

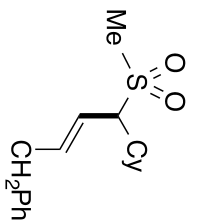

Table 5, entry 6  
 with (R,R)-L1

Injection Date : 2/6/2014 12:39:55 AM  
 Sample Name : JC11113  
 Acq. Operator : MK  
 Acq. Instrument : Instrument 1  
 Different Inj Volume from Sequence :  
 Actual Inj Volume : 15 µl  
 Inj Volume : 5 µl  
 Location : Vial 32  
 Seq. Line : 3  
 Last changed : 7/6/2013 9:54:10 AM by CE  
 Analysis Method : C:\HPCHEM\1\METHODS\IB-05-40.M  
 Last changed : 8/2/2014 12:33:23 AM by MK  
 (modified after loading)

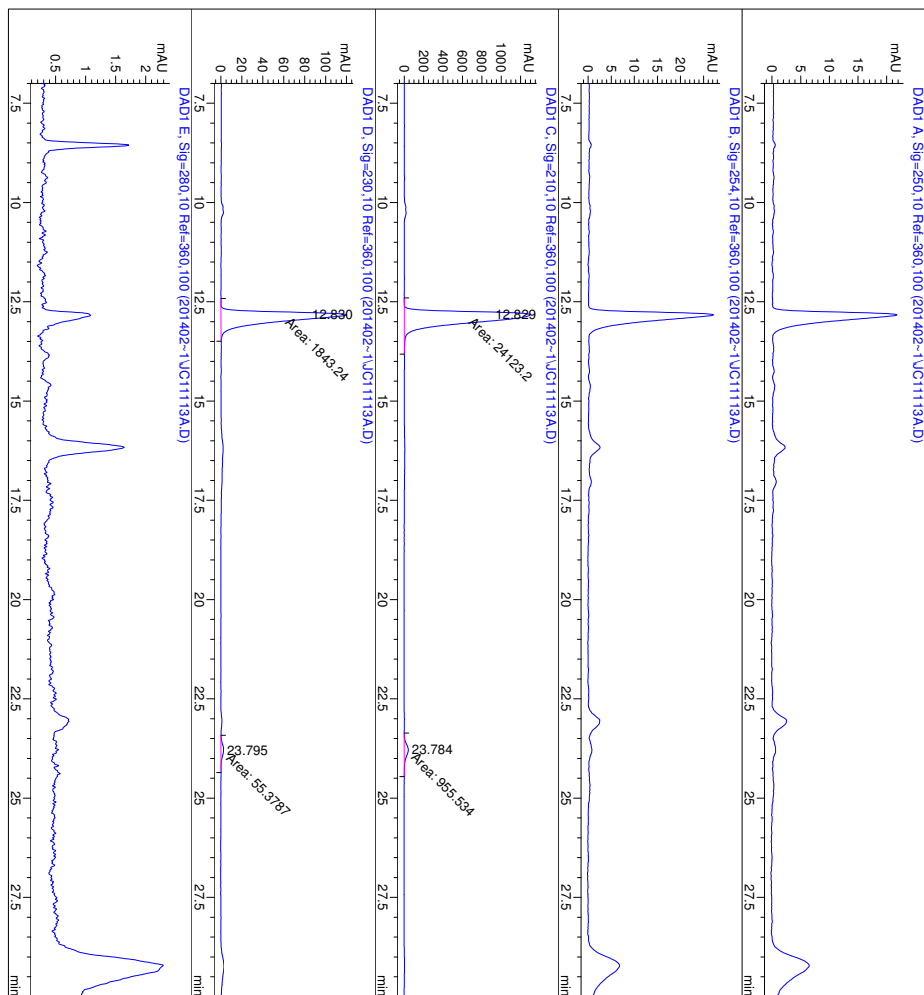

Area Percent Report  
 Sorted By : Signal  
 Multiplier : 1.0000  
 Dilution : 1.0000  
 Use Multiplier & Dilution Factor with ISTDs

| Signal                                   | RetTime [min] | Type | Width [min] | Area [mAU*s] | Height [mAU] | Area %  |
|------------------------------------------|---------------|------|-------------|--------------|--------------|---------|
| Signal 1: DADI A, Sig=250,10 Ref=360,100 | 12.829        | MF   | 0.3098      | 24123.2e4    | 1297.61914   | 96.1899 |
| Signal 2: DADI B, Sig=254,10 Ref=360,100 | 23.784        | FM   | 0.3747      | 955.53381    | 42.49660     | 3.8101  |
| Totals :                                 |               |      |             | 2.50787e4    | 1340.11574   |         |

Results obtained with enhanced integrator!

| Signal                                   | RetTime [min] | Type | Width [min] | Area [mAU*s] | Height [mAU] | Area %  |
|------------------------------------------|---------------|------|-------------|--------------|--------------|---------|
| Signal 4: DADI D, Sig=230,10 Ref=360,100 | 12.830        | MF   | 0.2556      | 1843.23779   | 120.16679    | 97.0832 |
|                                          | 23.795        | FM   | 0.3695      | 55.37868     | 2.49811      | 2.9168  |
| Totals :                                 |               |      |             | 1898.61647   | 122.66490    |         |

Results obtained with enhanced integrator!  
 Signal 5: DADI E, Sig=280,10 Ref=360,100  
 \*\*\* End of Report \*\*\*

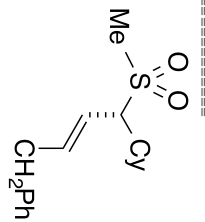

Table 5, entry 6 with (S,S)-L1
